# Supplementary material for: An algorithm for automatic fitting and formula assignment in atmospheric mass spectra
Source: Copernicus journal article supplement (doi:10.5194/amt-18-1537-2025), 2025-04-03

Free fit

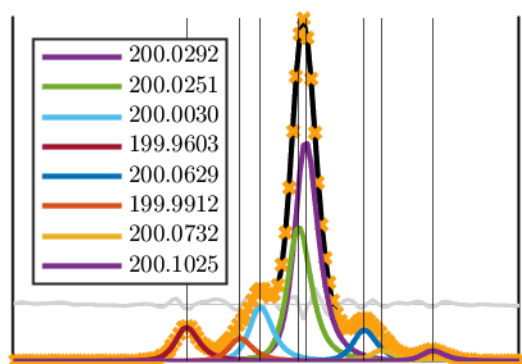

Final fit

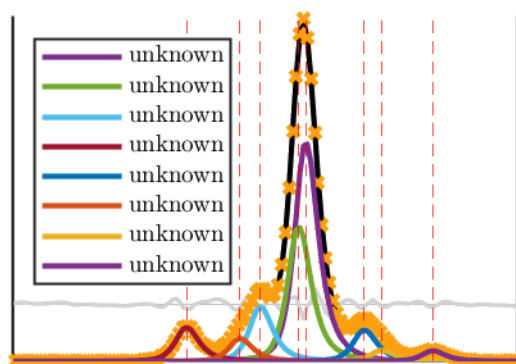

Manual fit

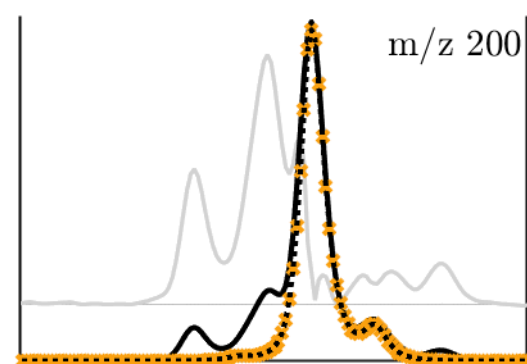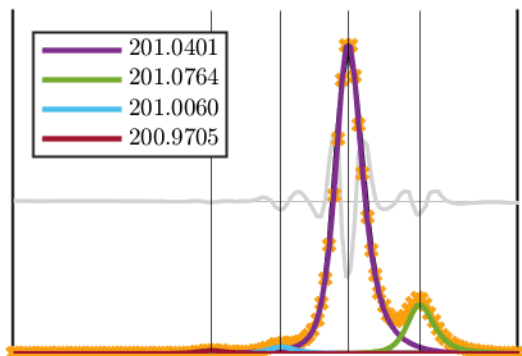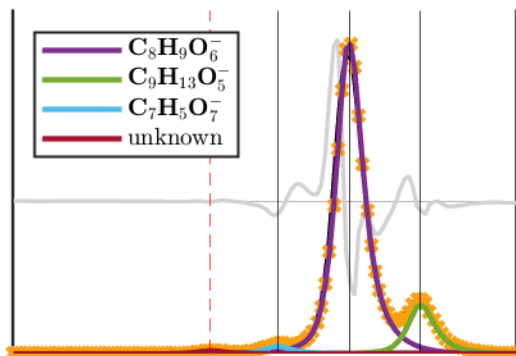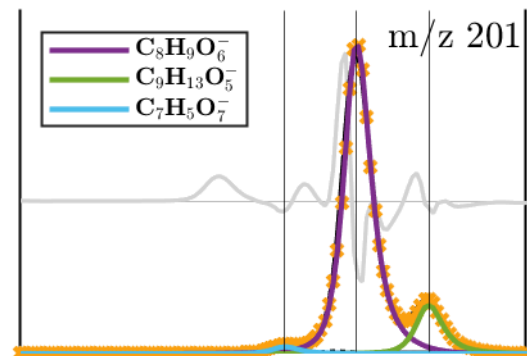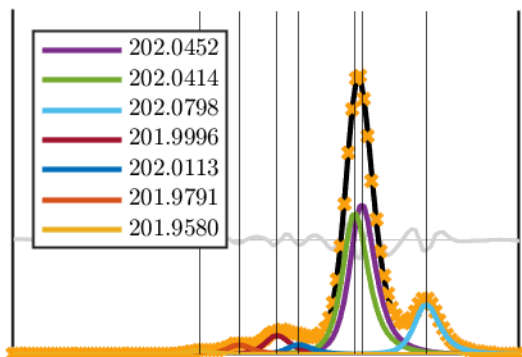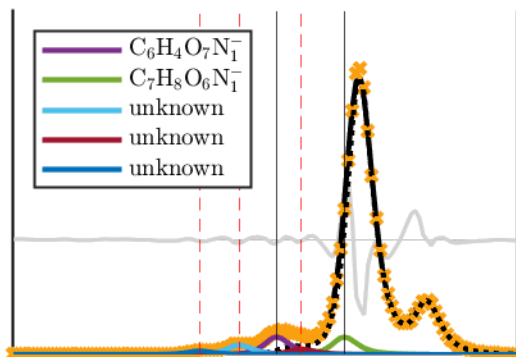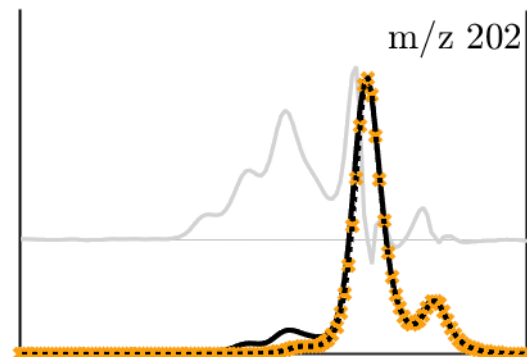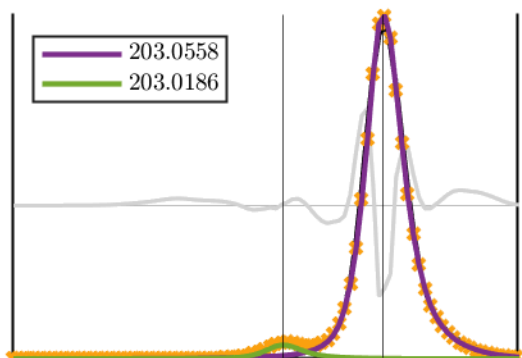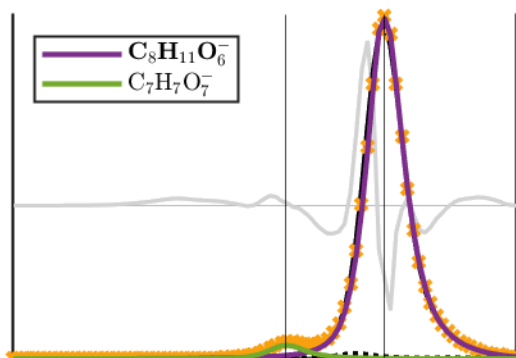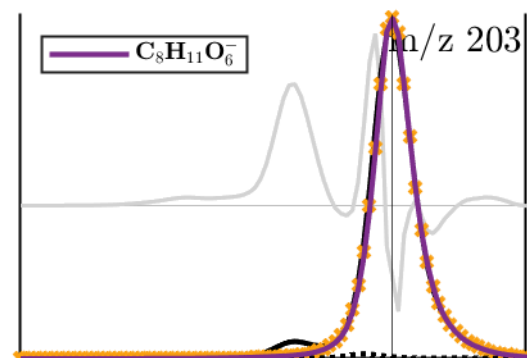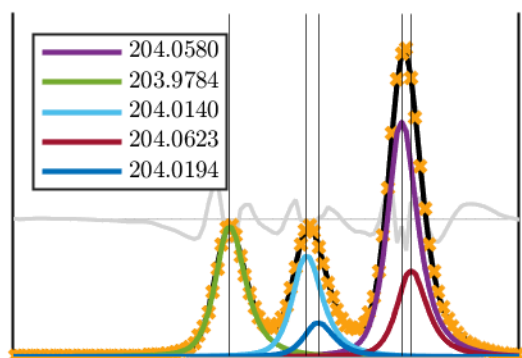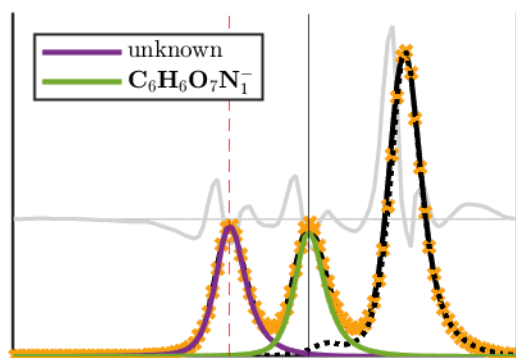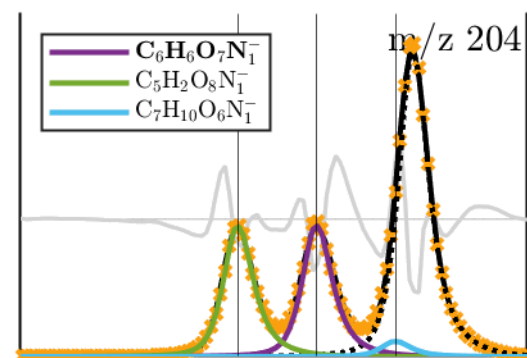

Free fit

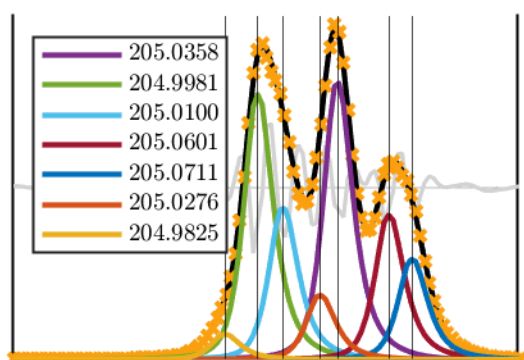

Final fit

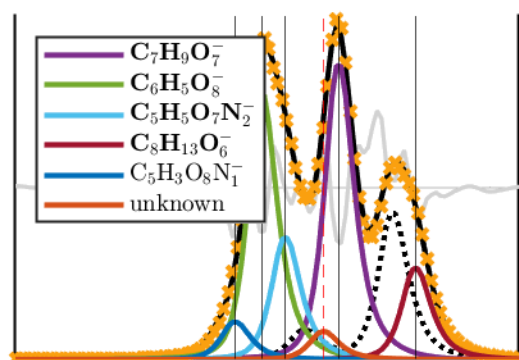

Manual fit

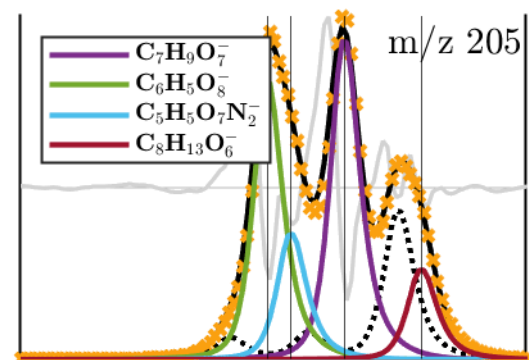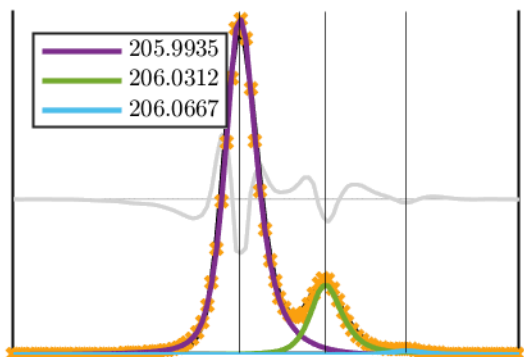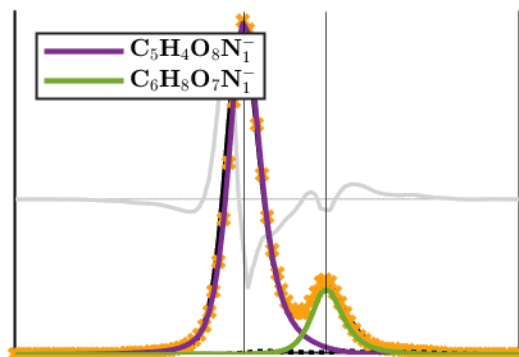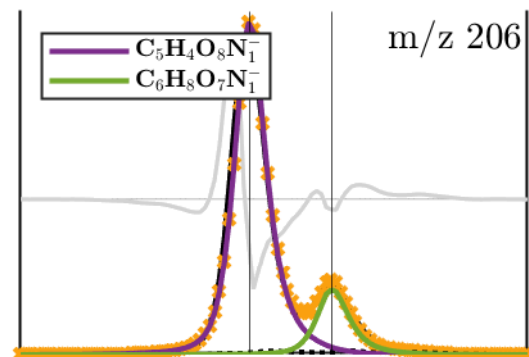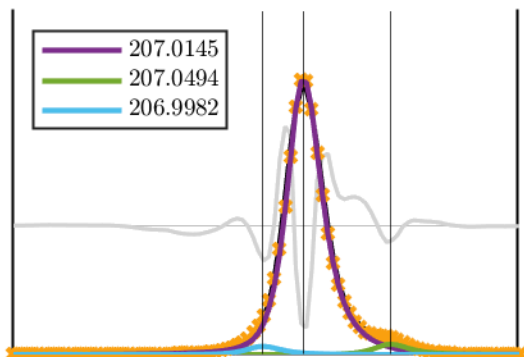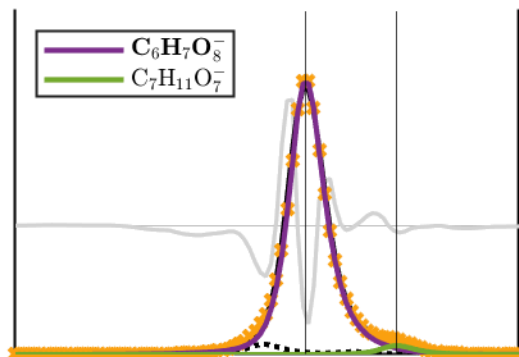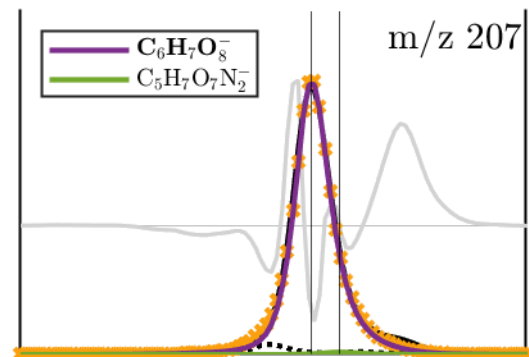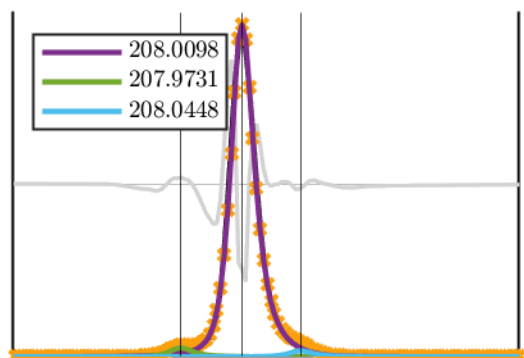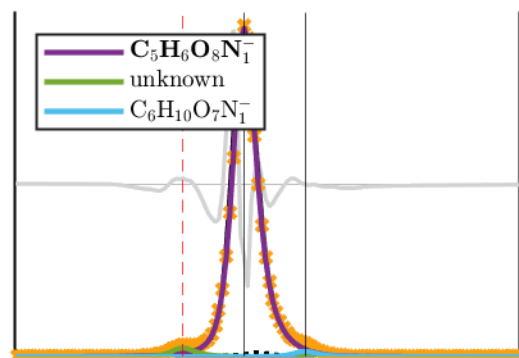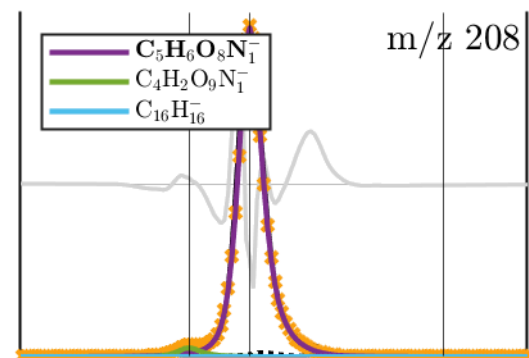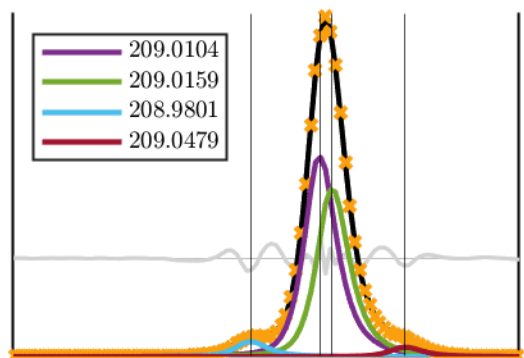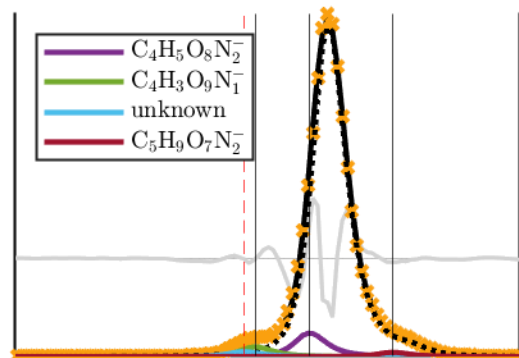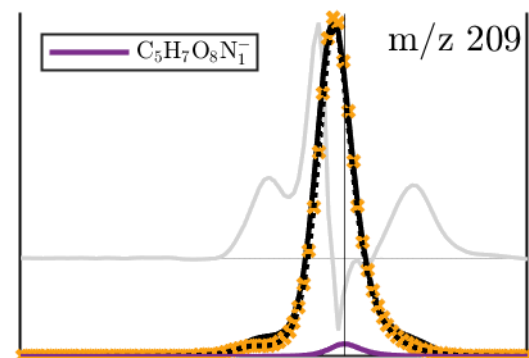

Free fit

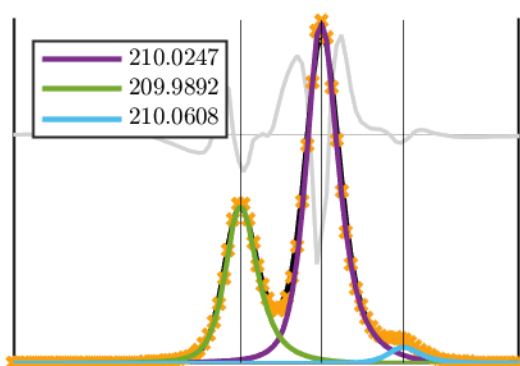

Final fit

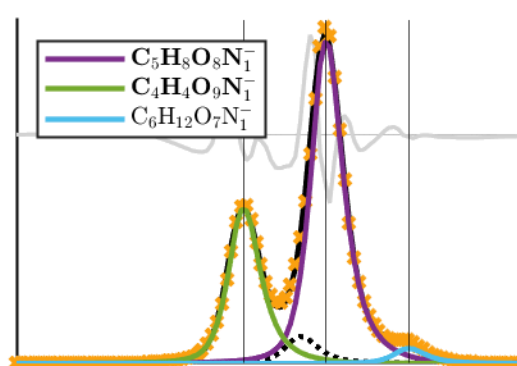

Manual fit

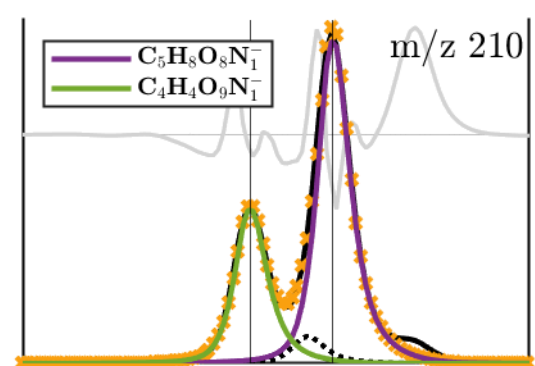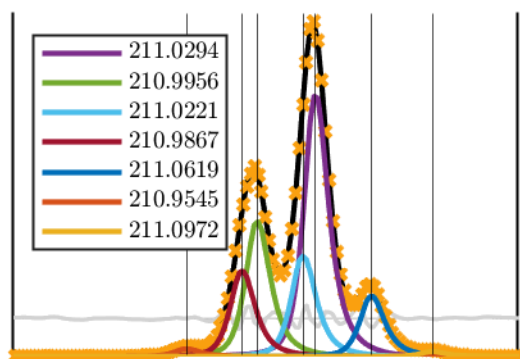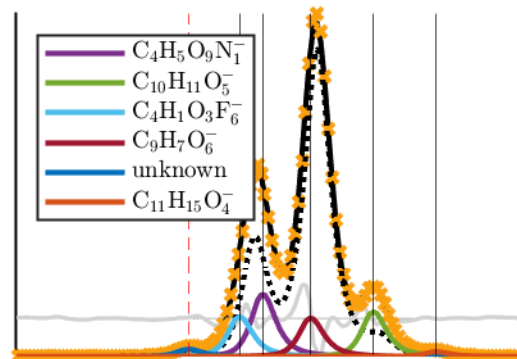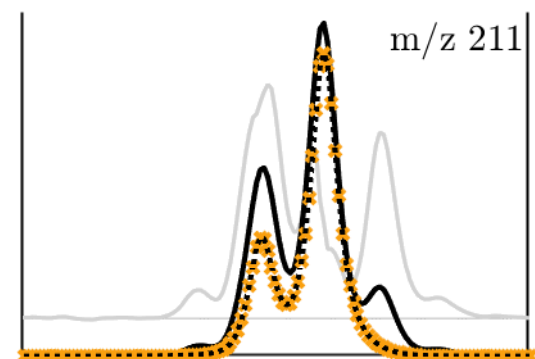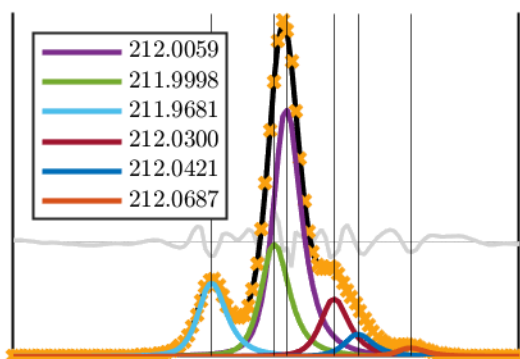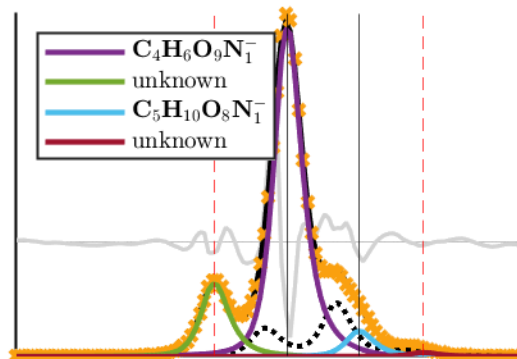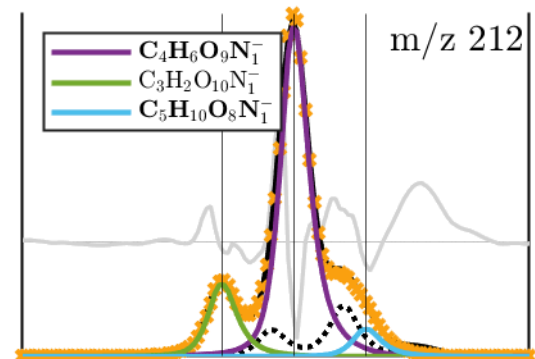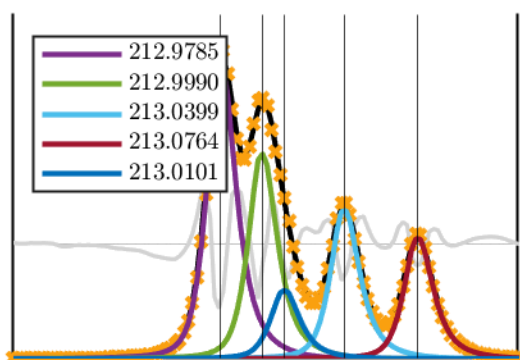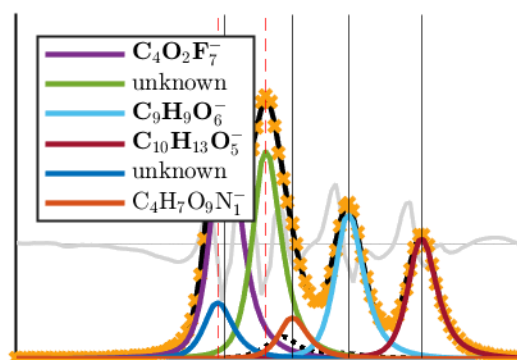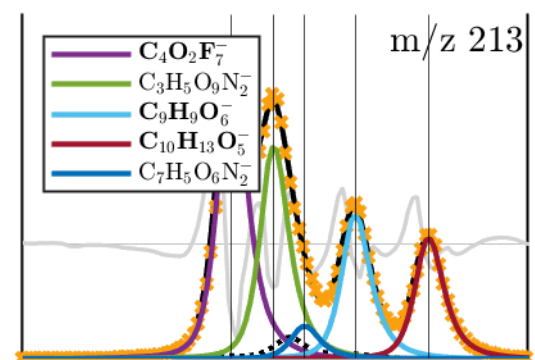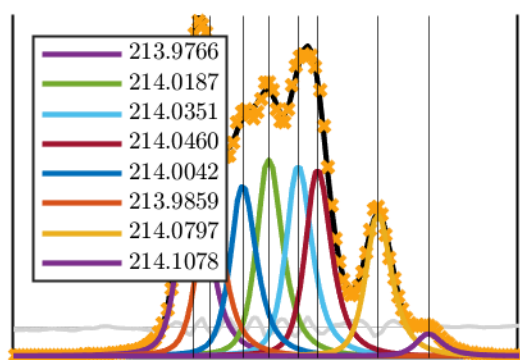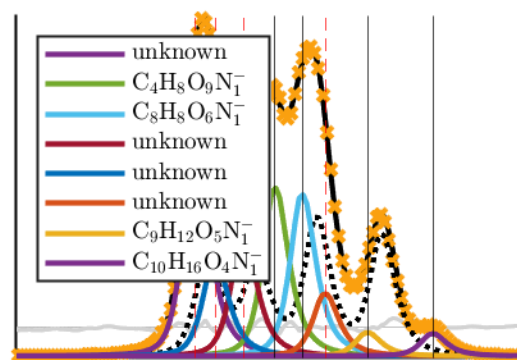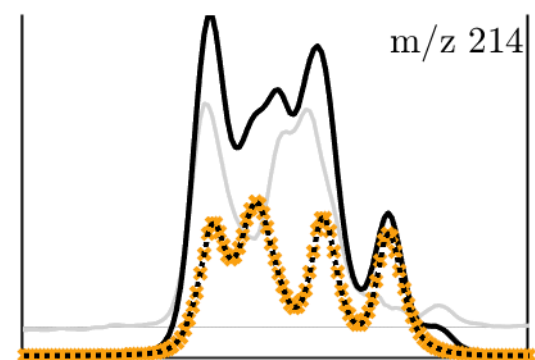

Free fit

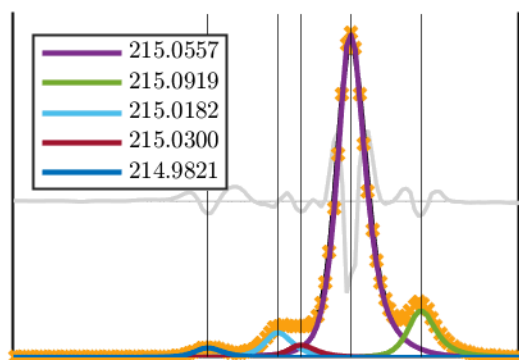

Final fit

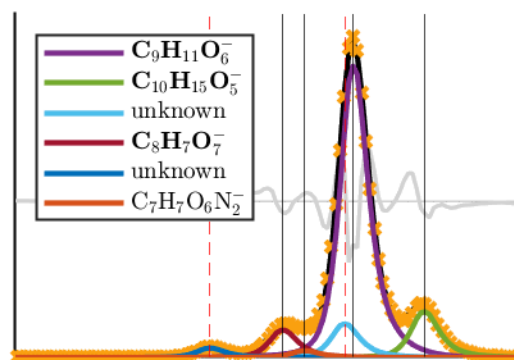

Manual fit

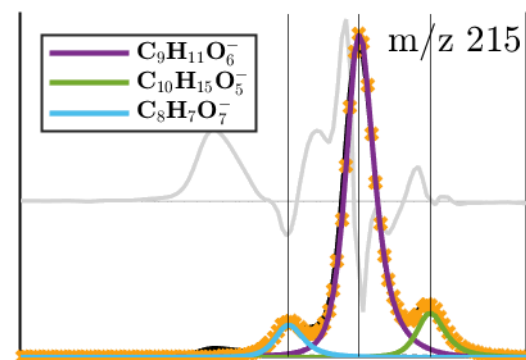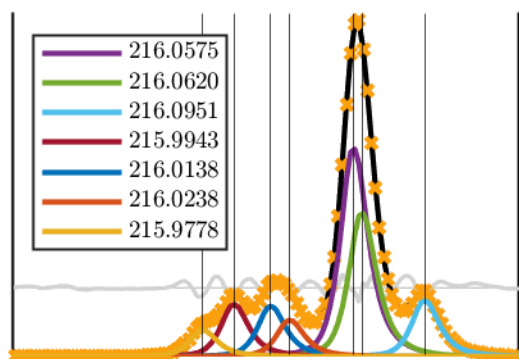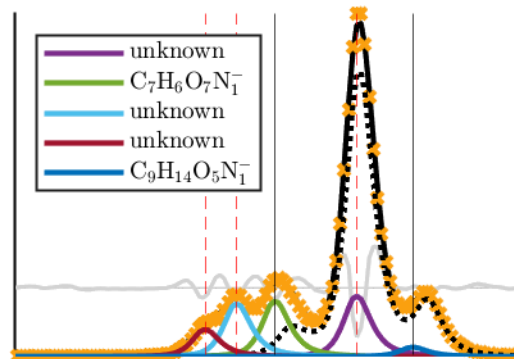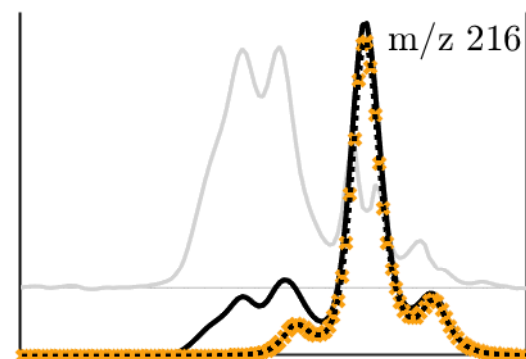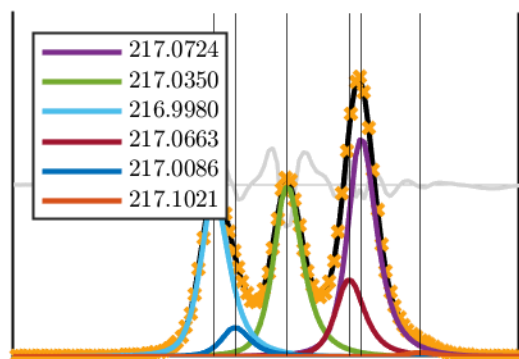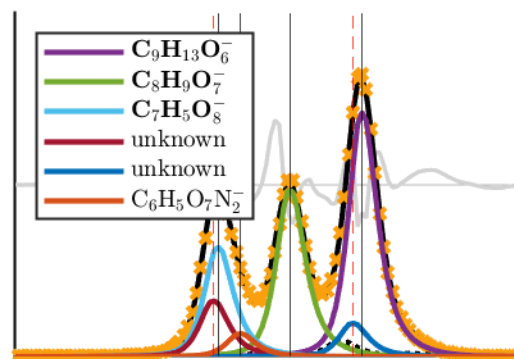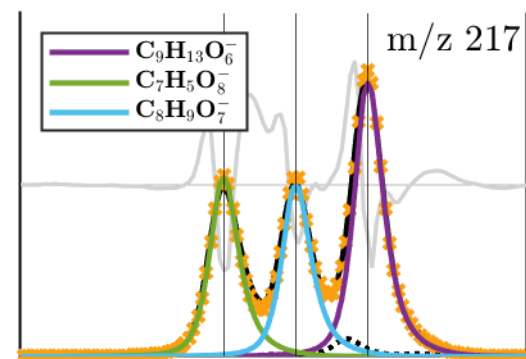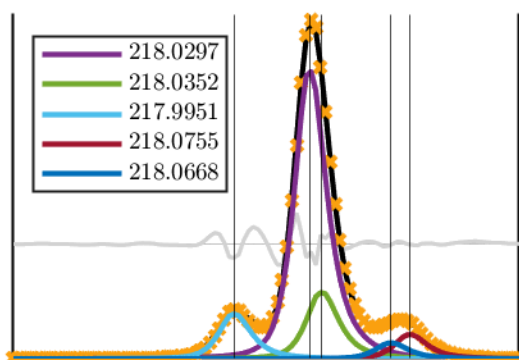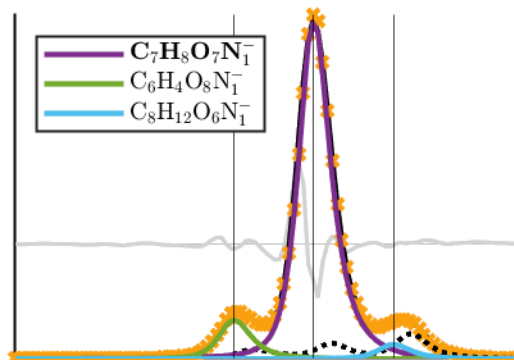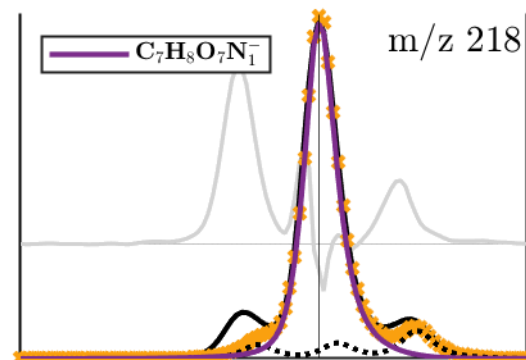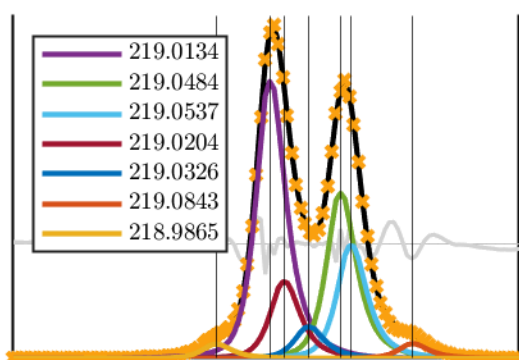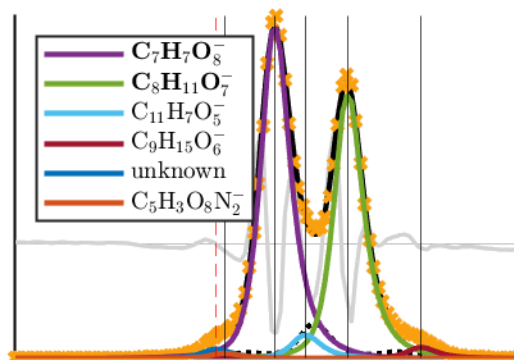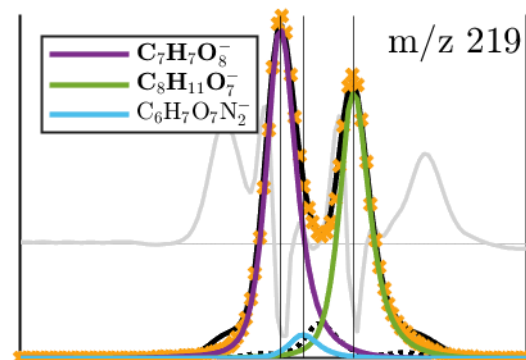



Free fit

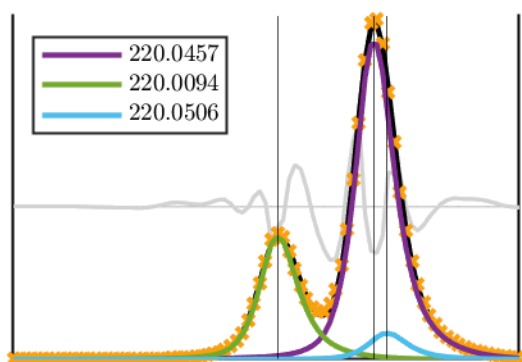

Final fit

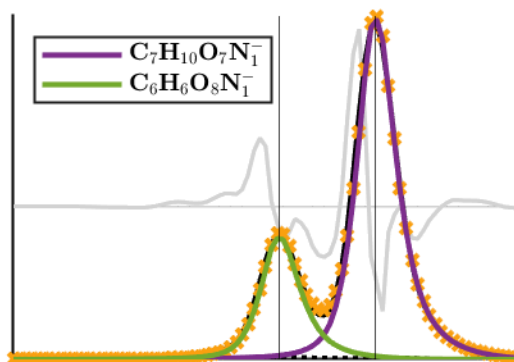

Manual fit

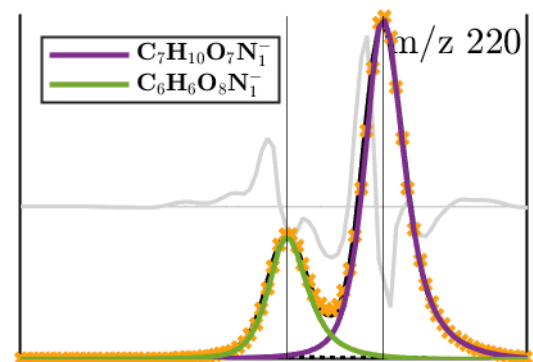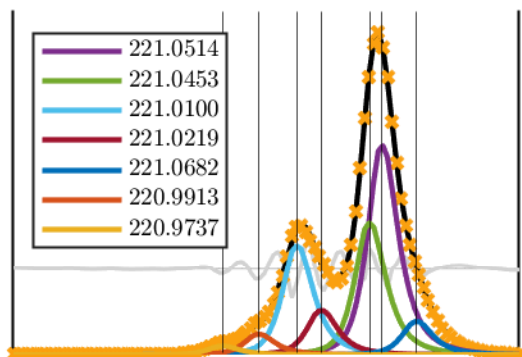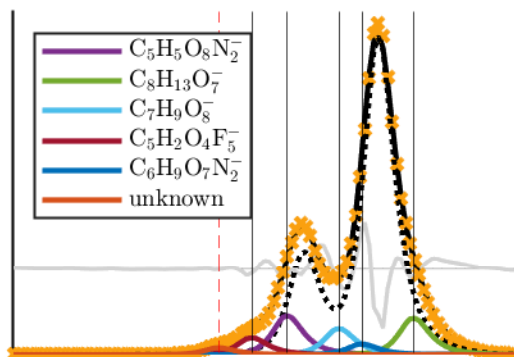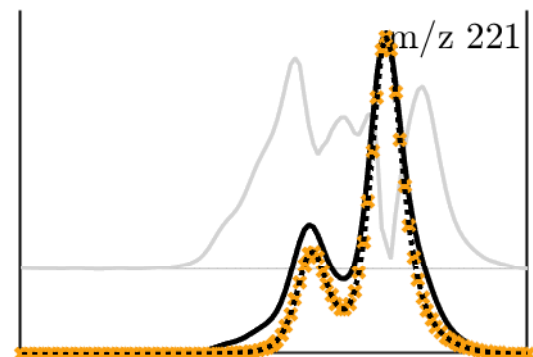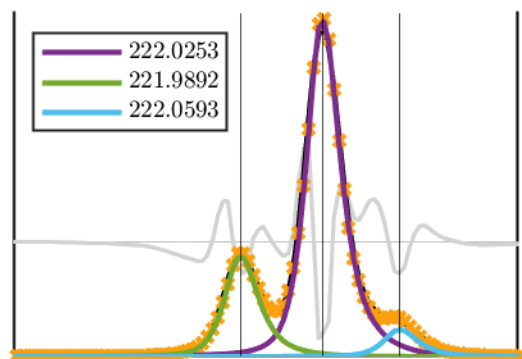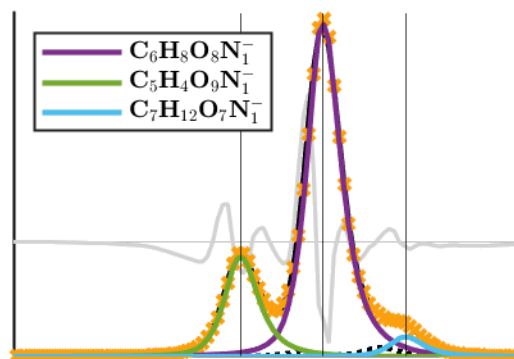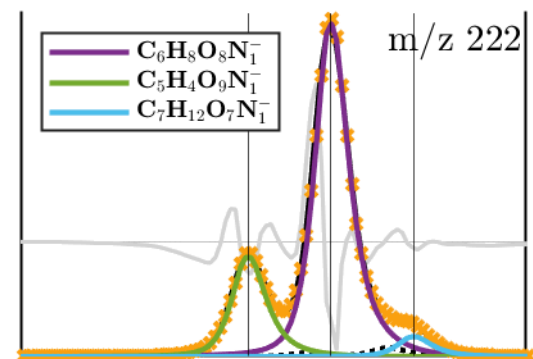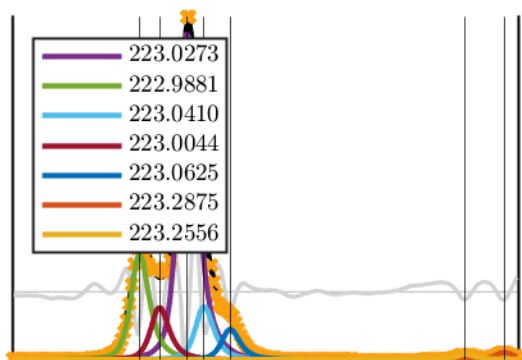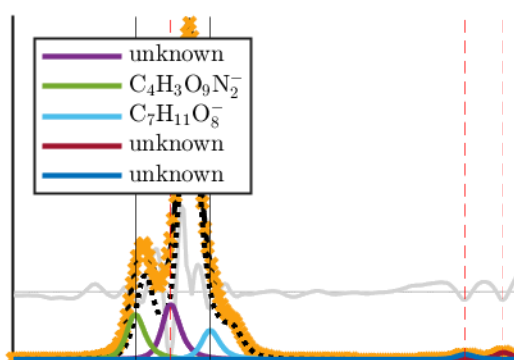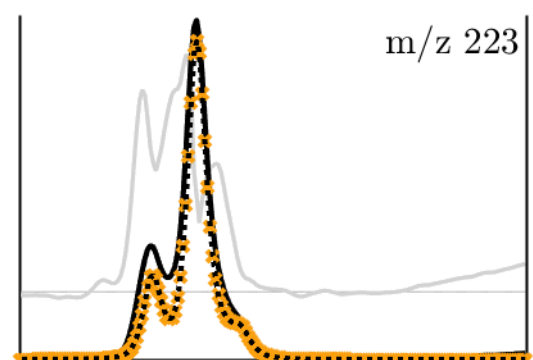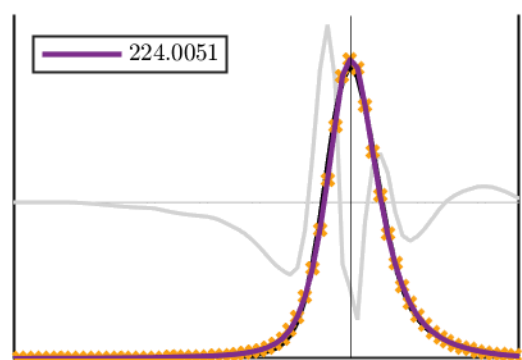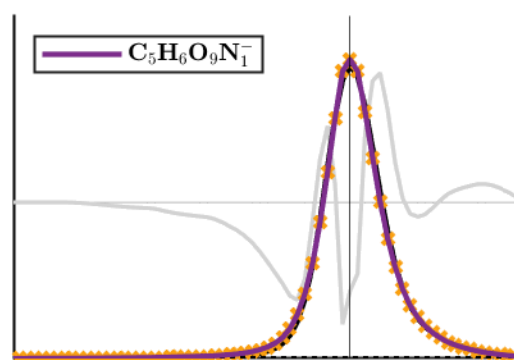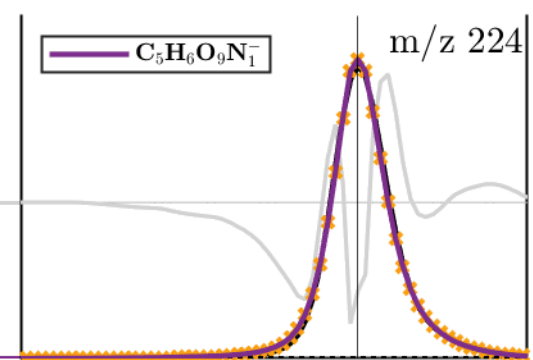

Free fit

Final fit

Manual fit

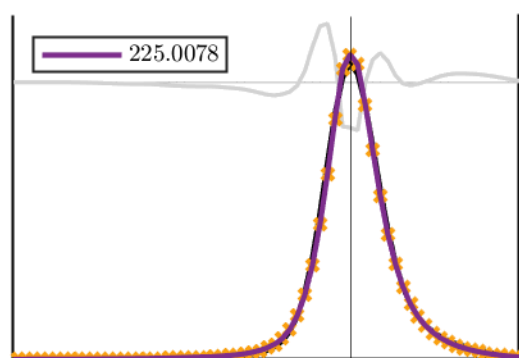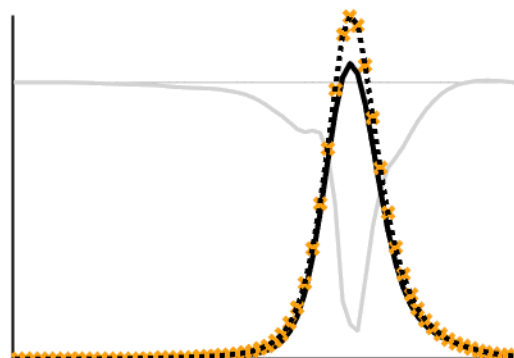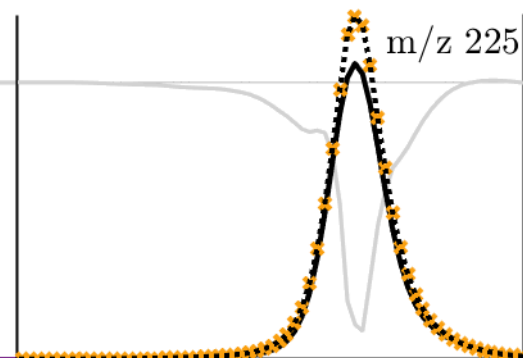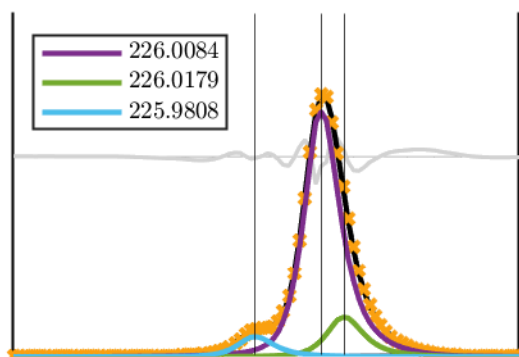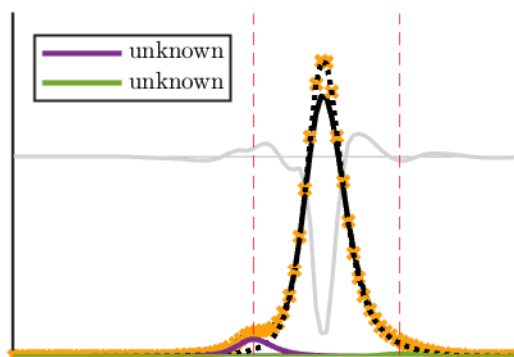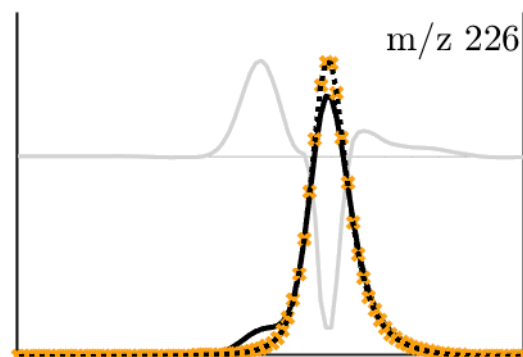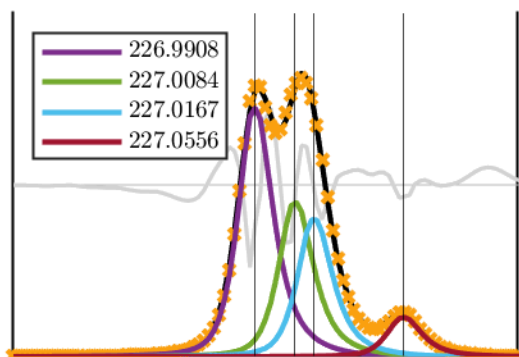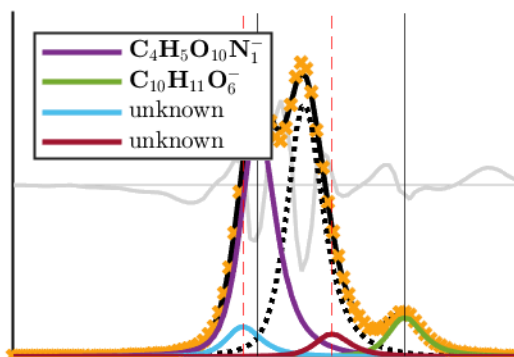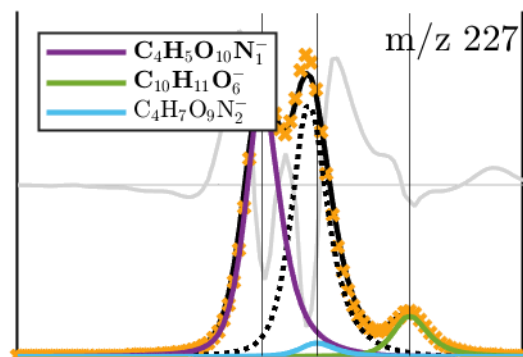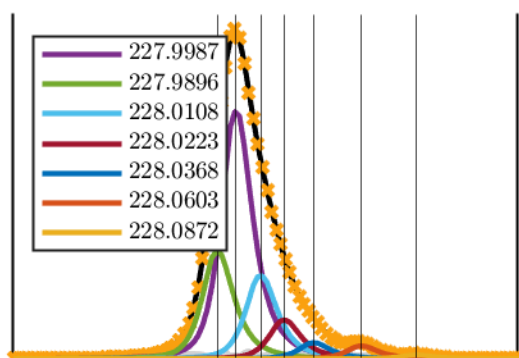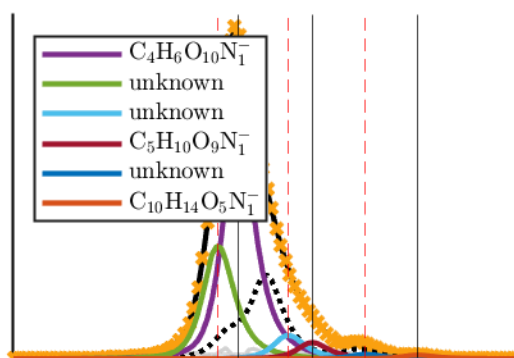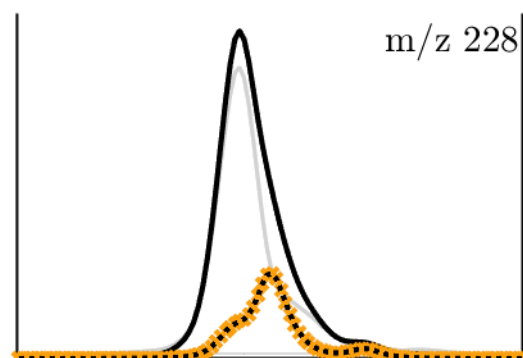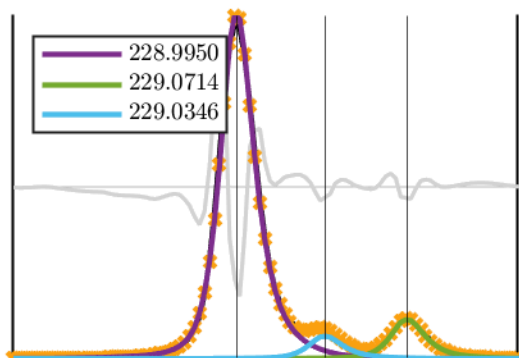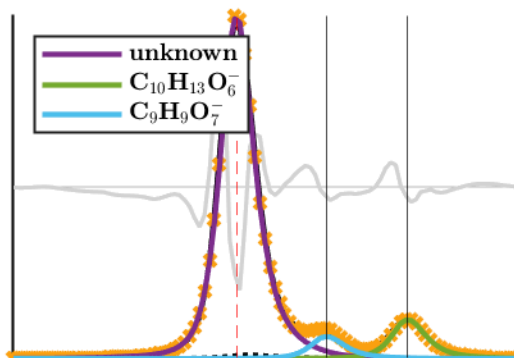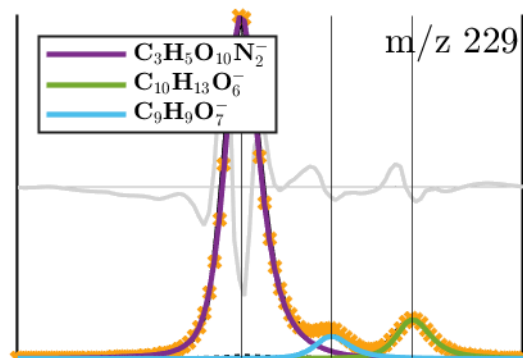

Free fit

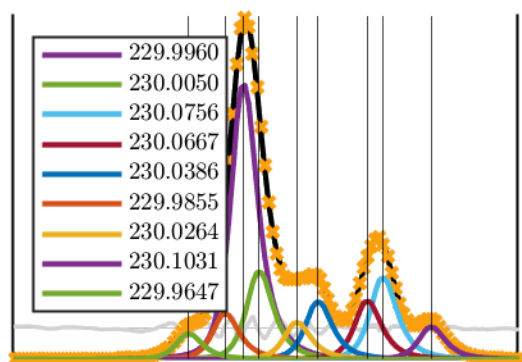

Final fit

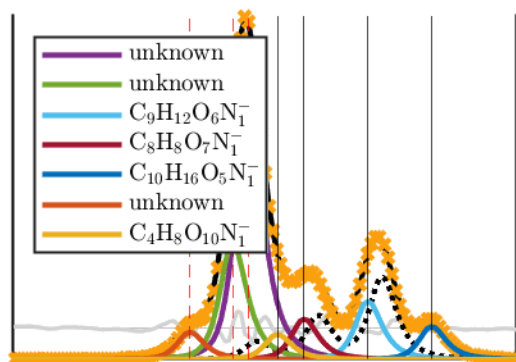

Manual fit

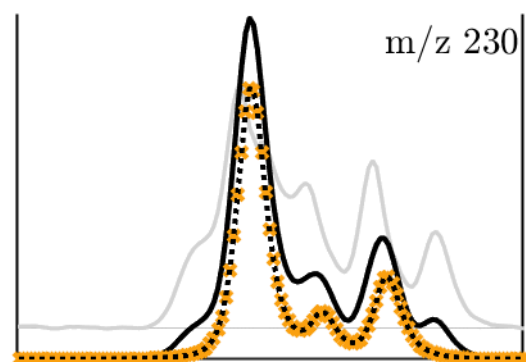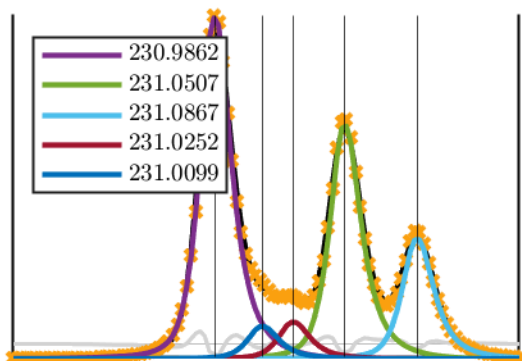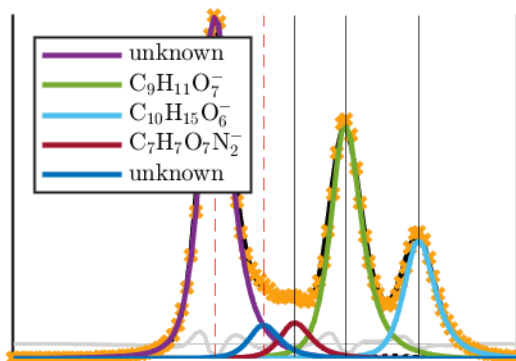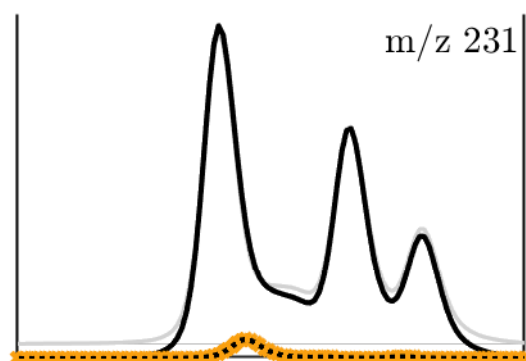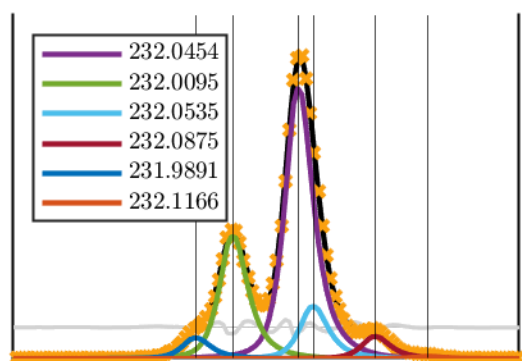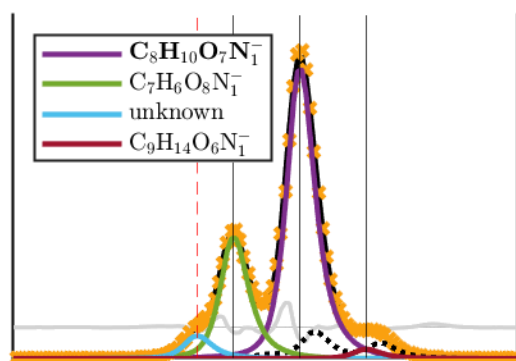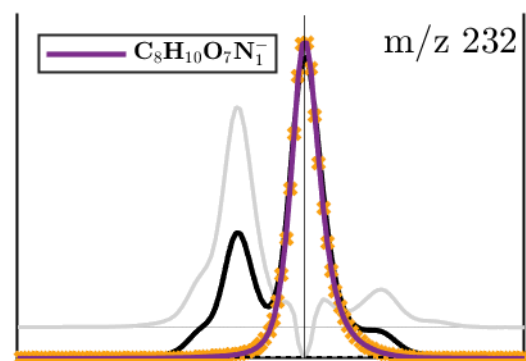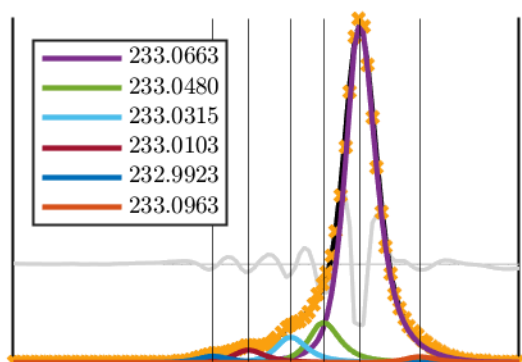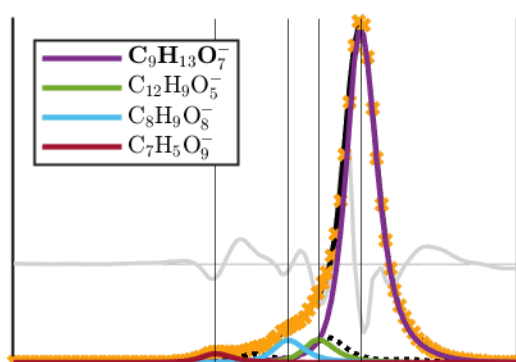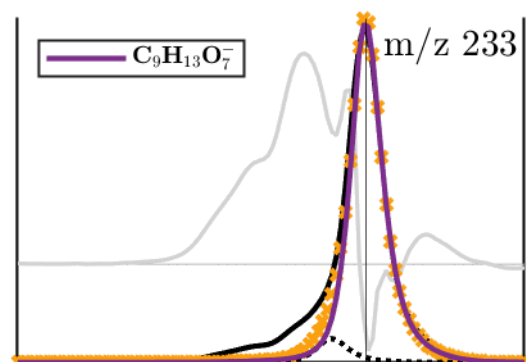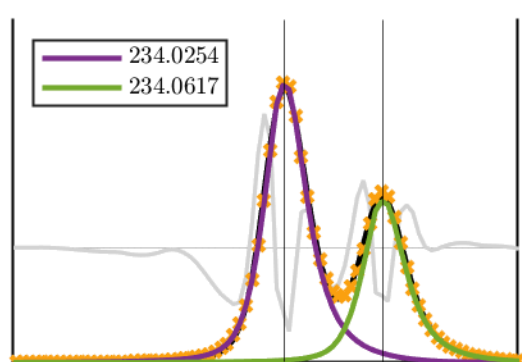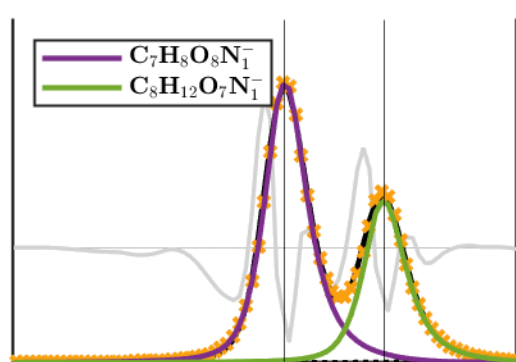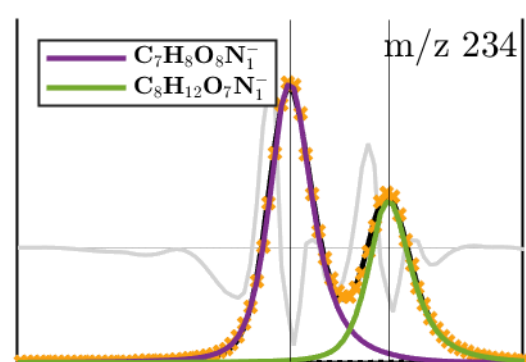

Free fit

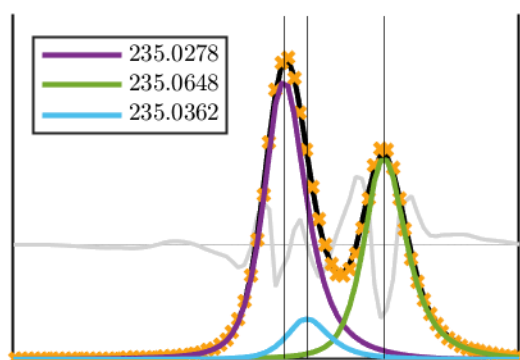

Final fit

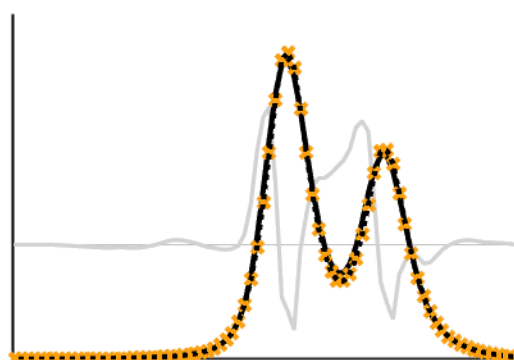

Manual fit

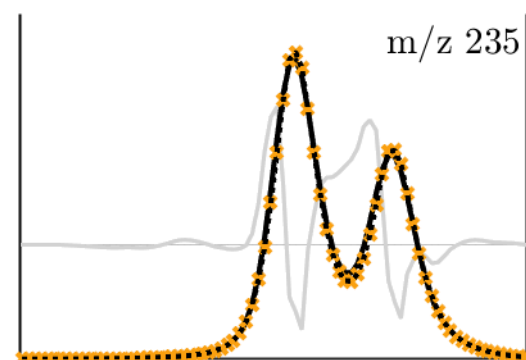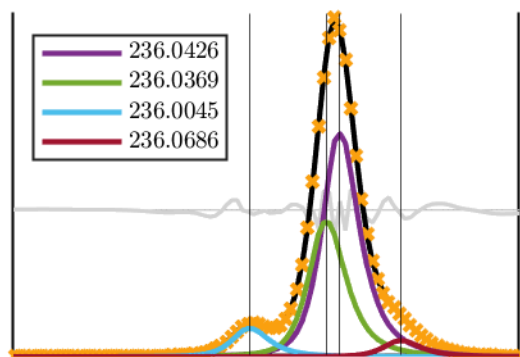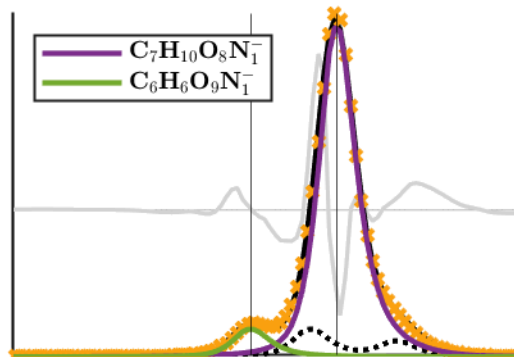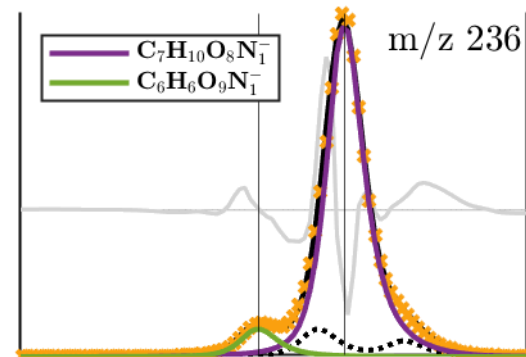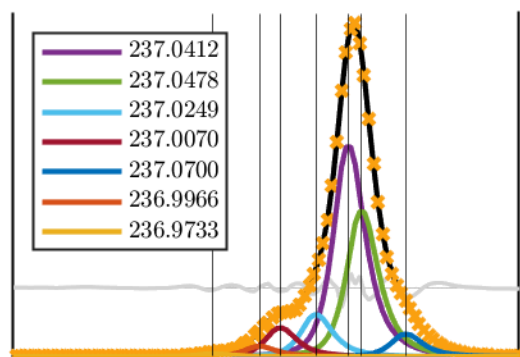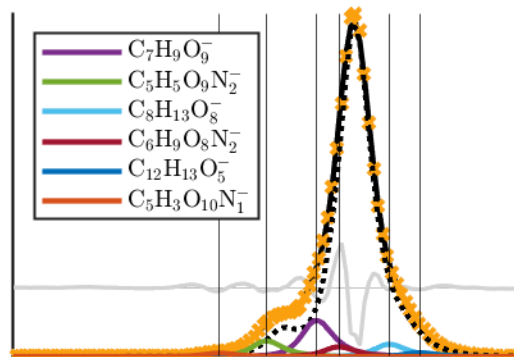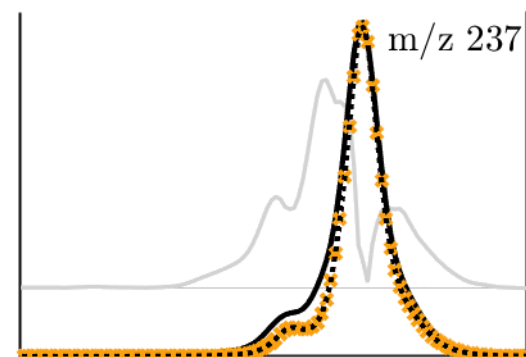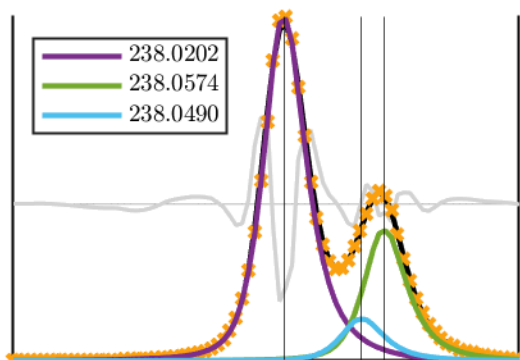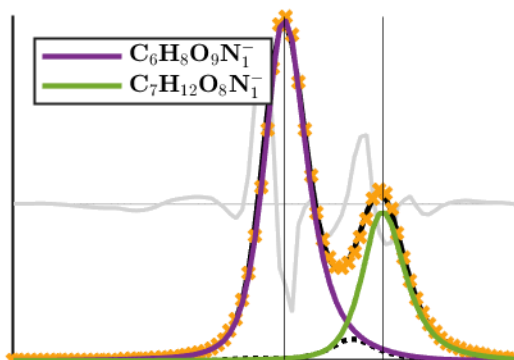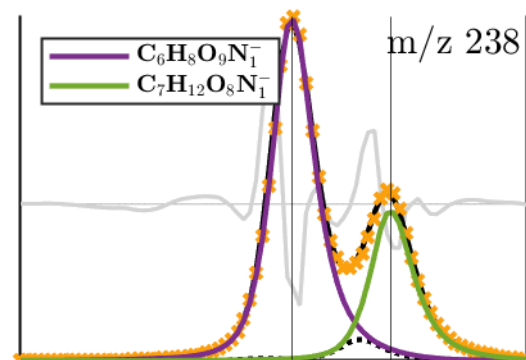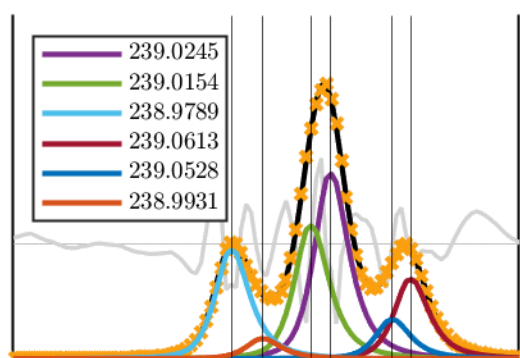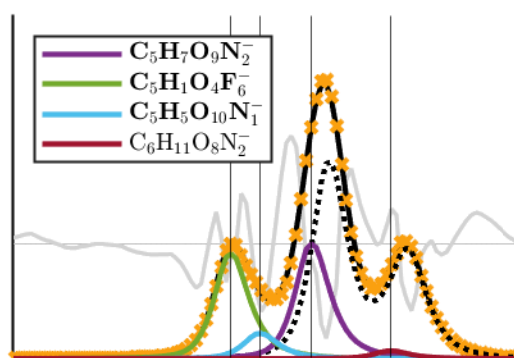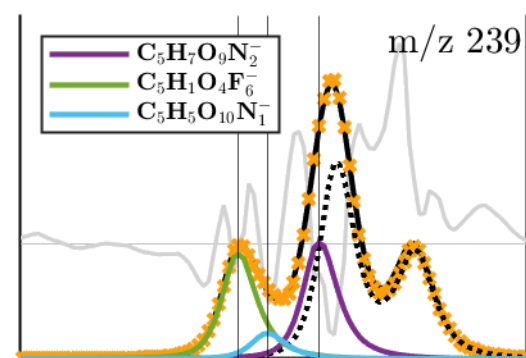



Free fit

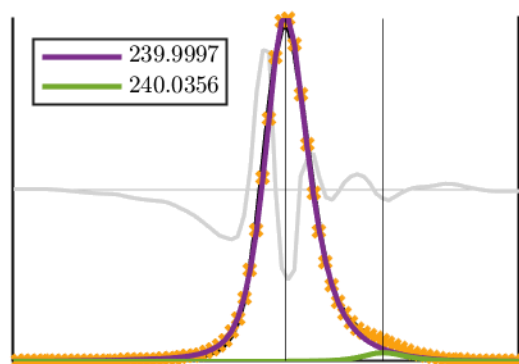

Final fit

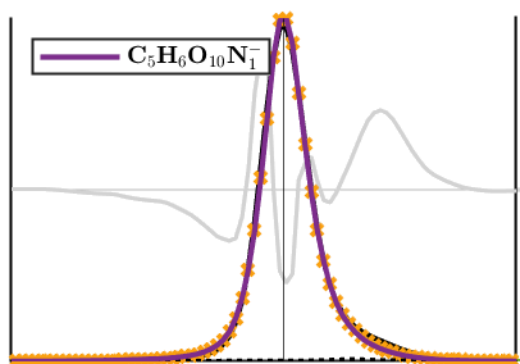

Manual fit

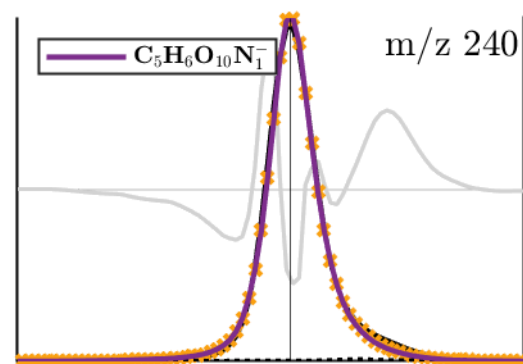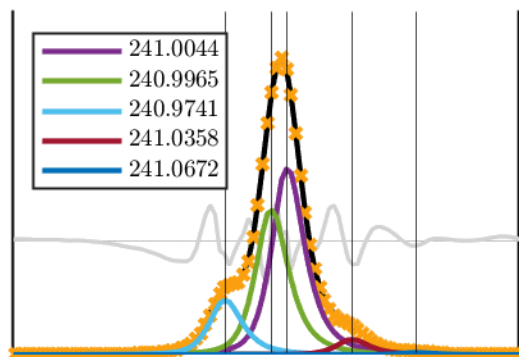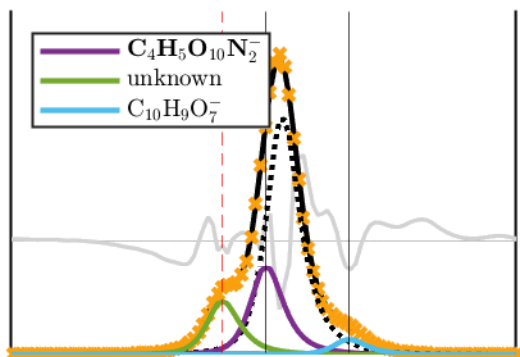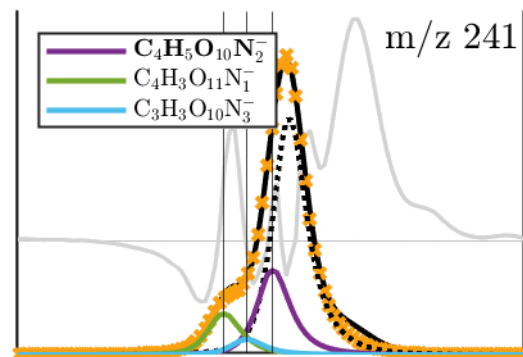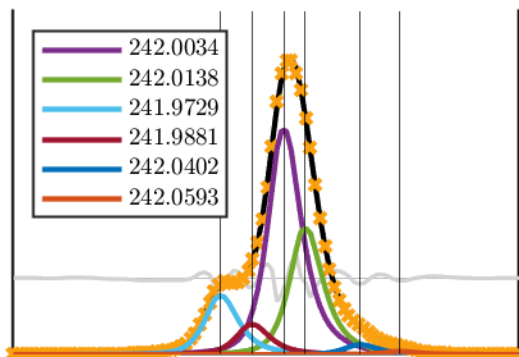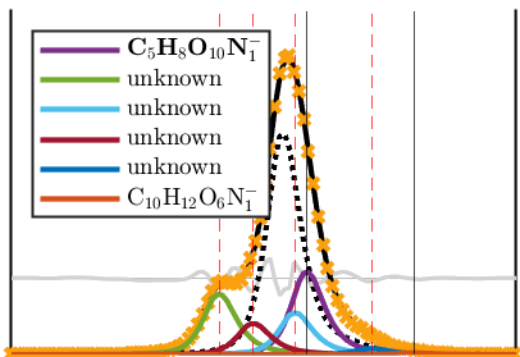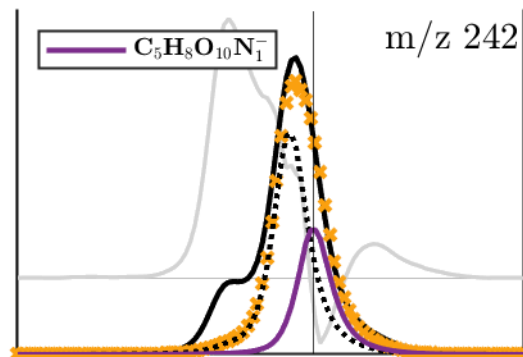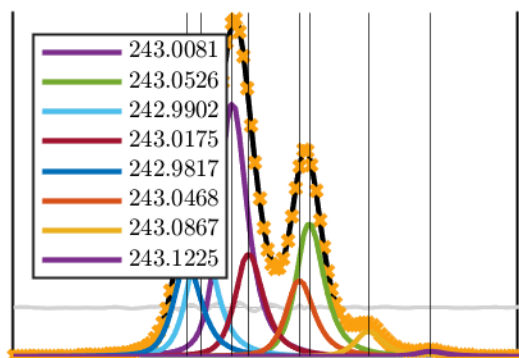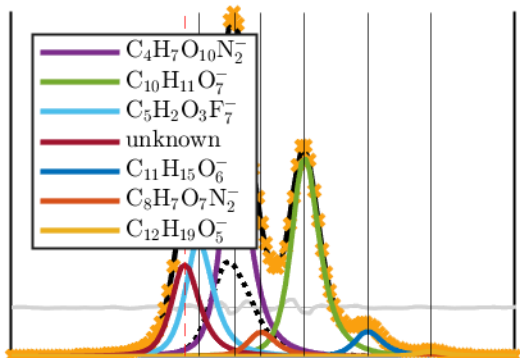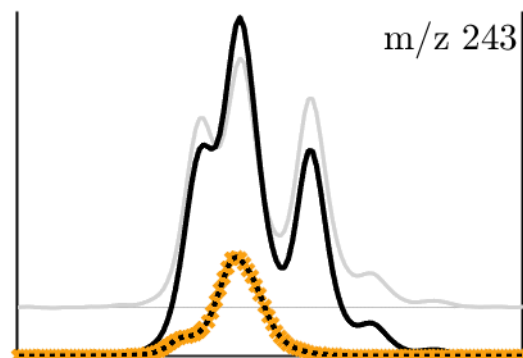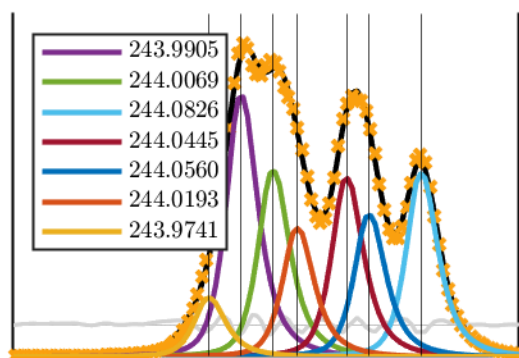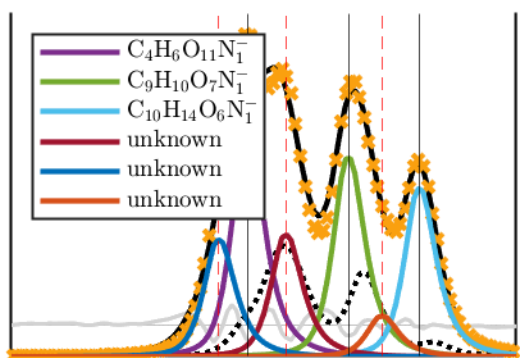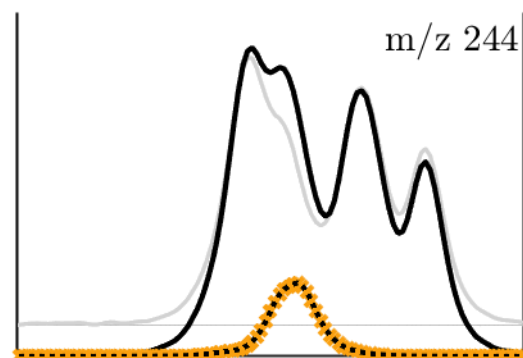

Free fit

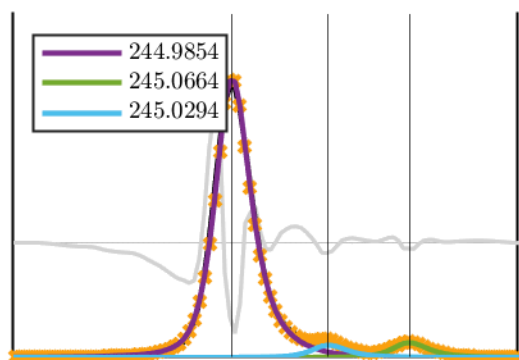

Final fit

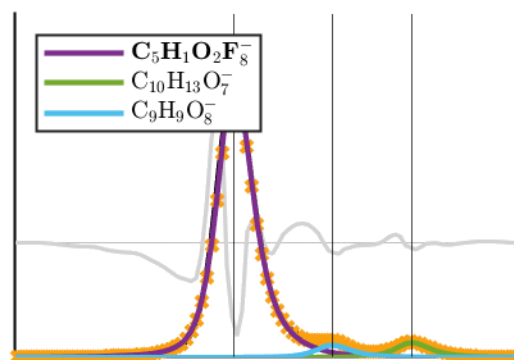

Manual fit

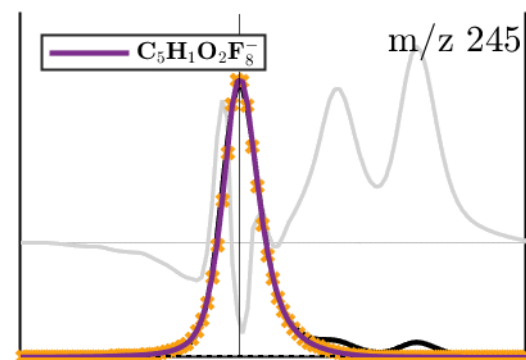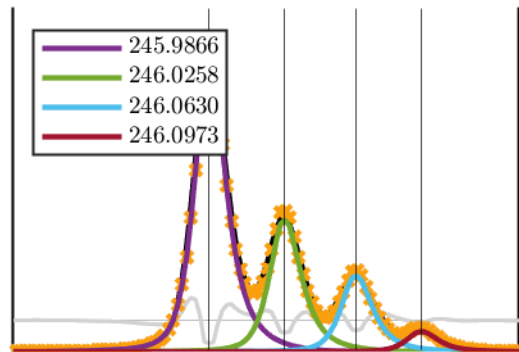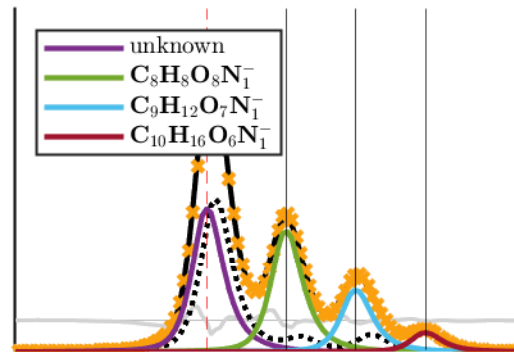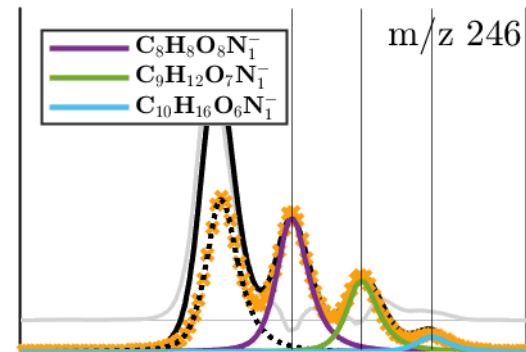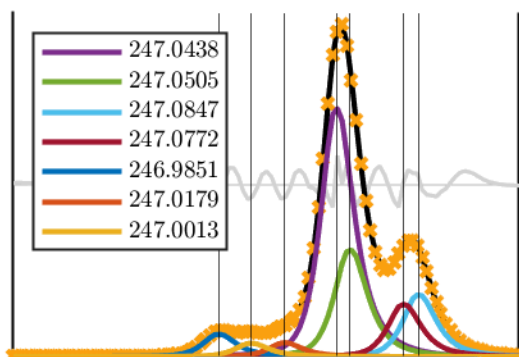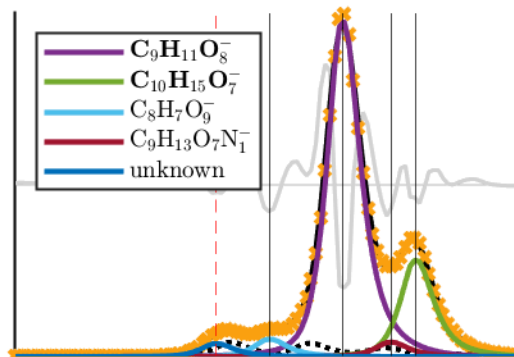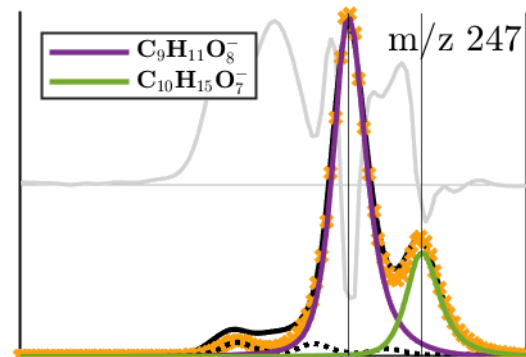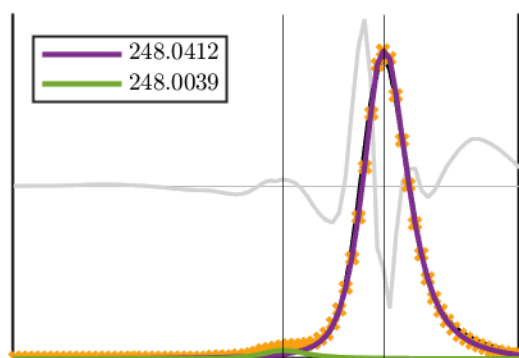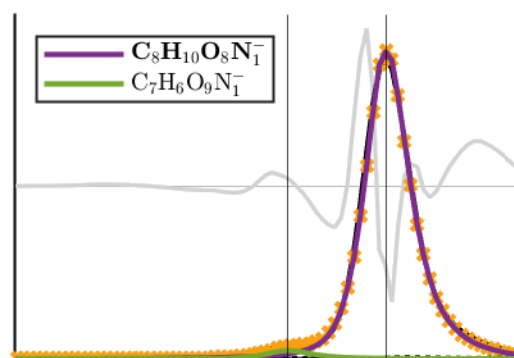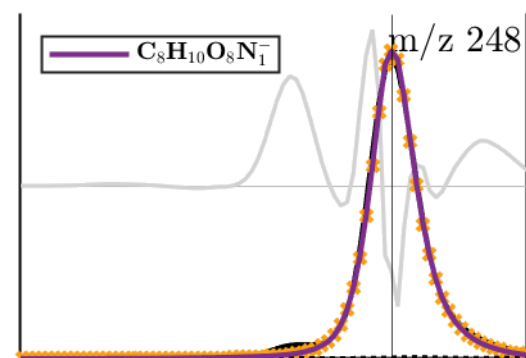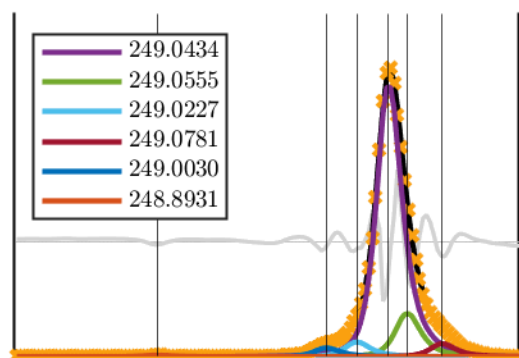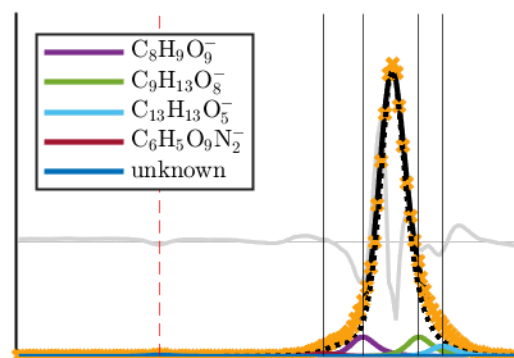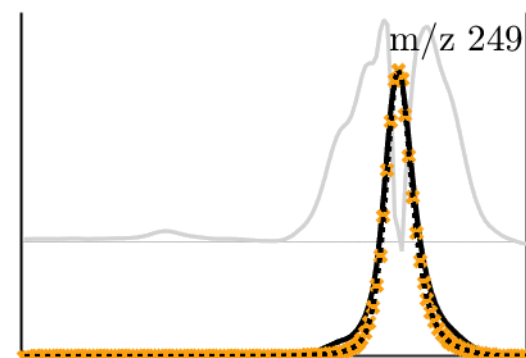

Free fit

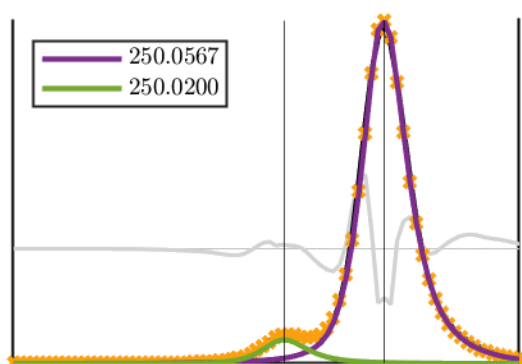

Final fit

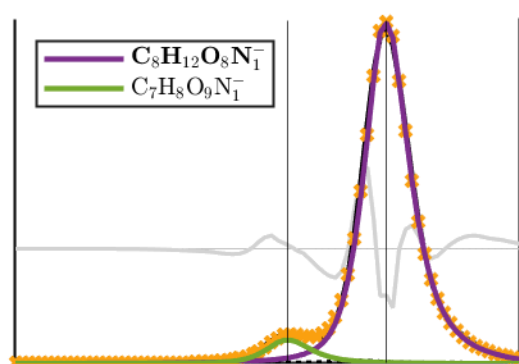

Manual fit

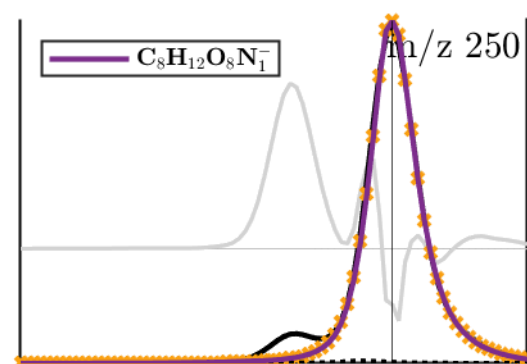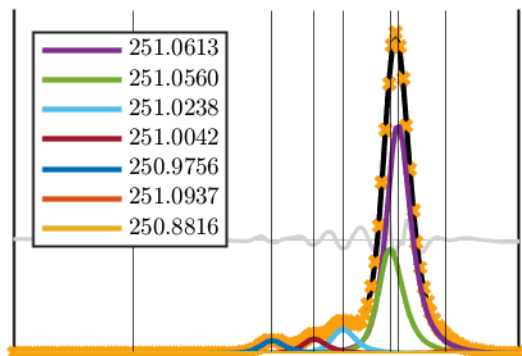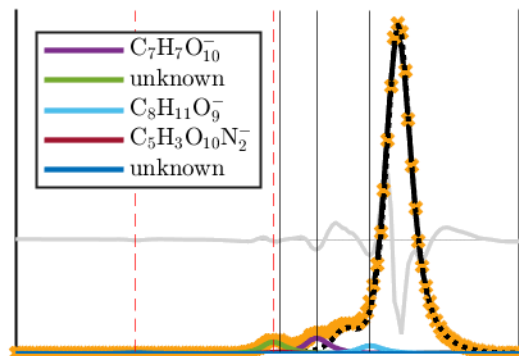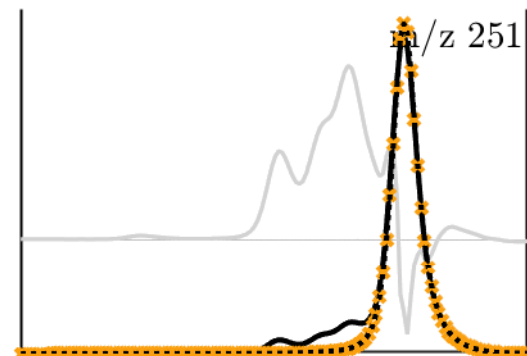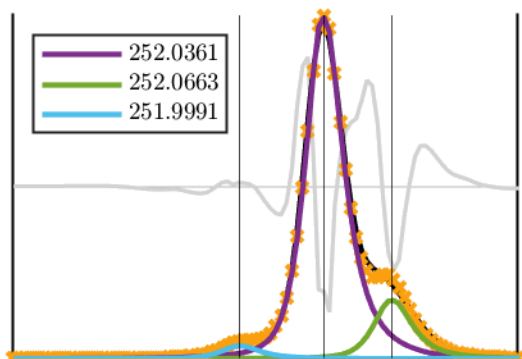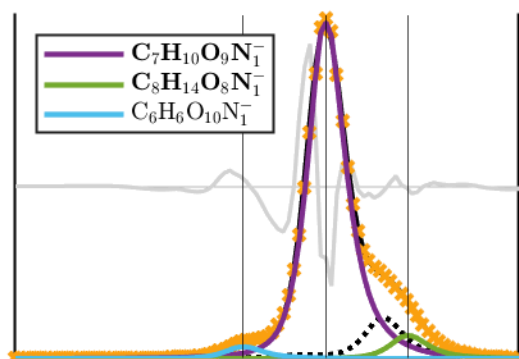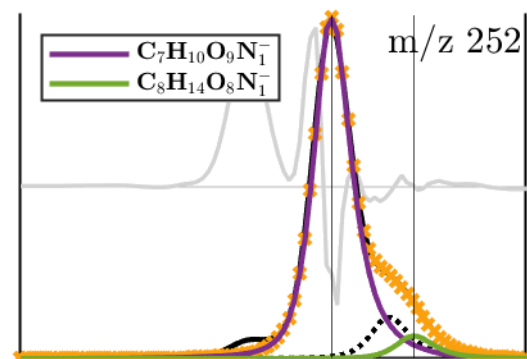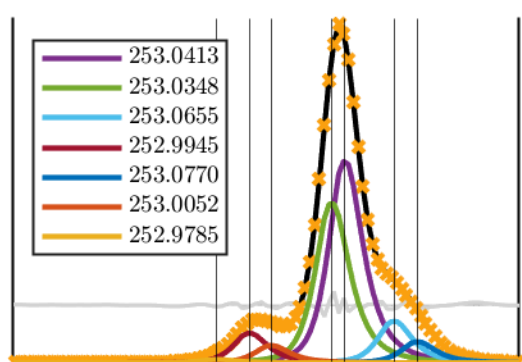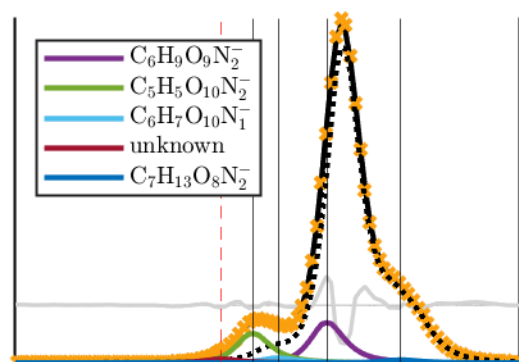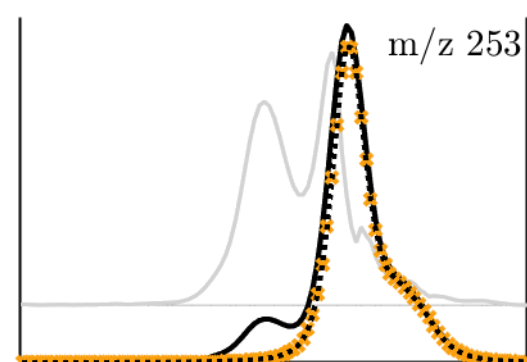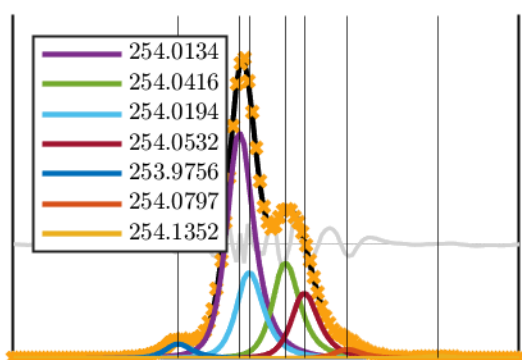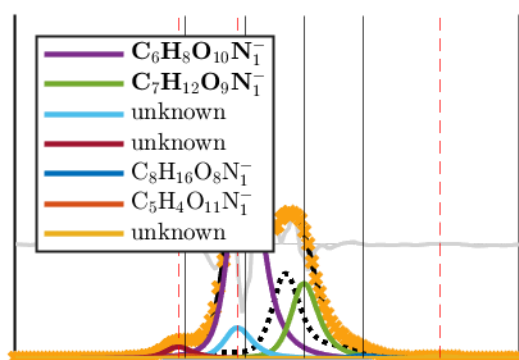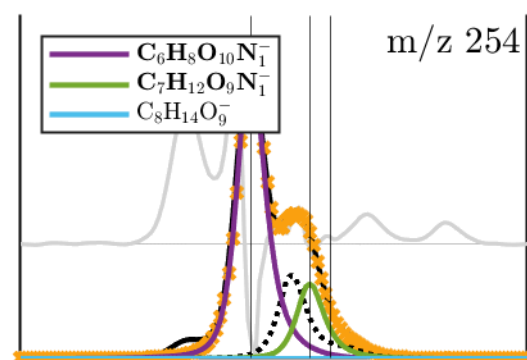

Free fit

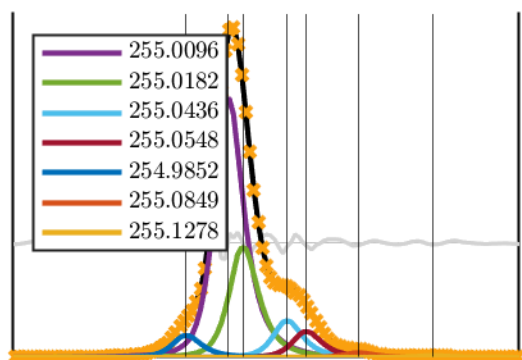

Final fit

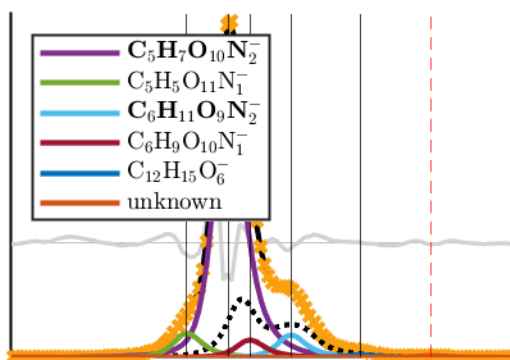

Manual fit

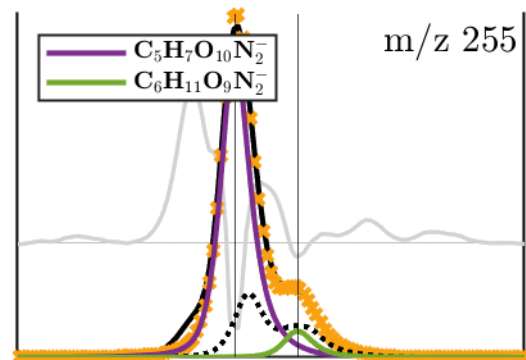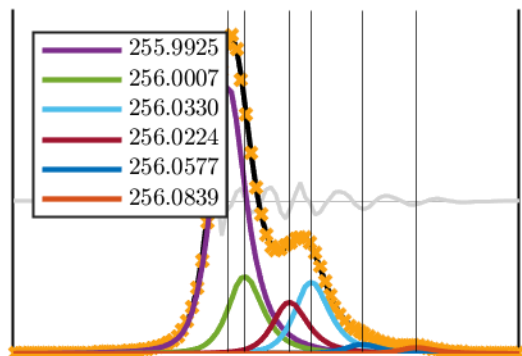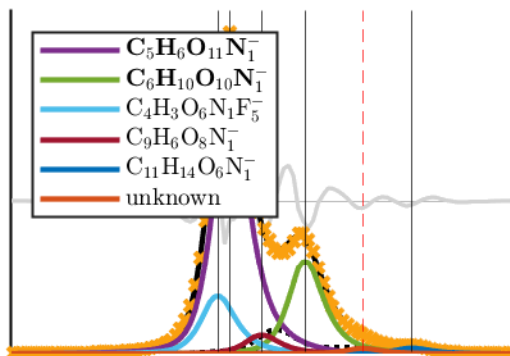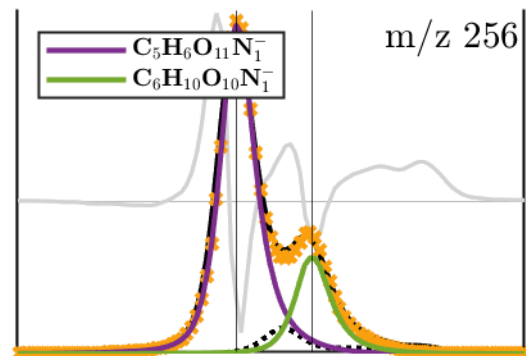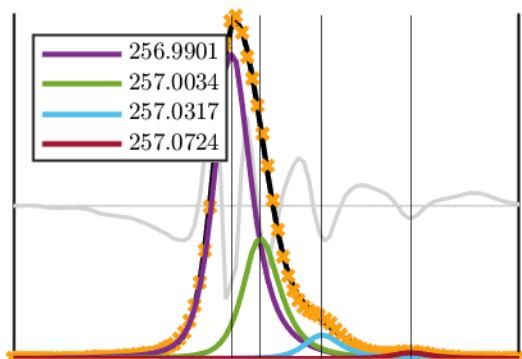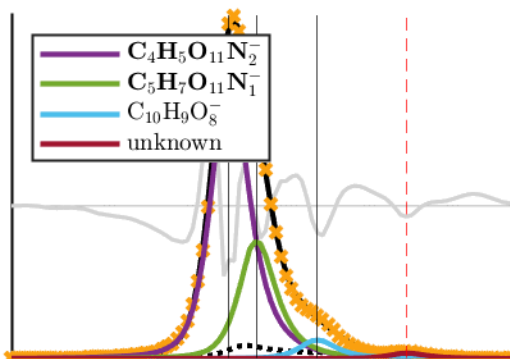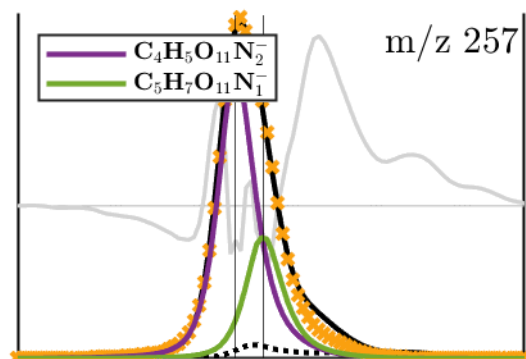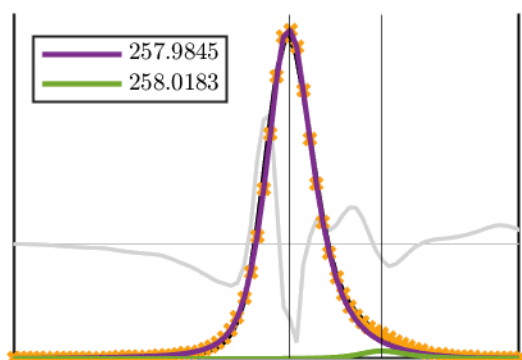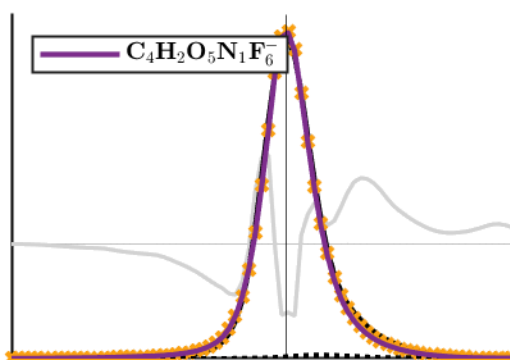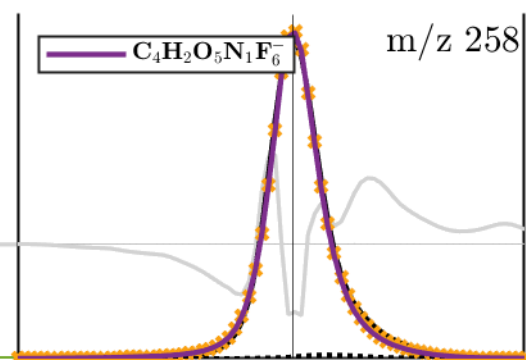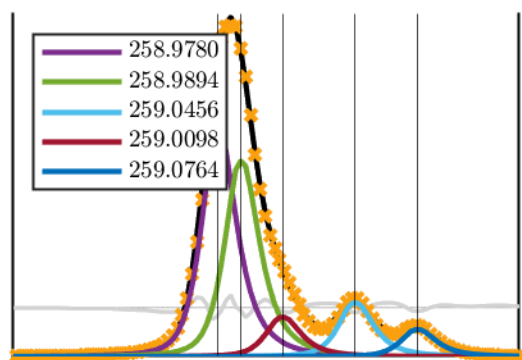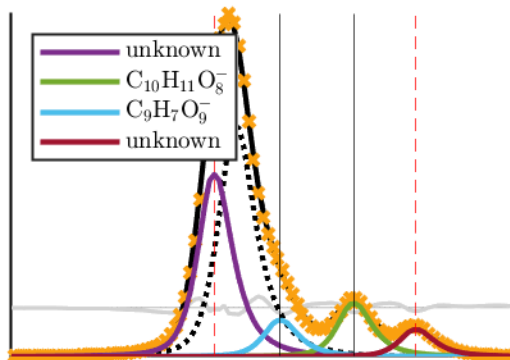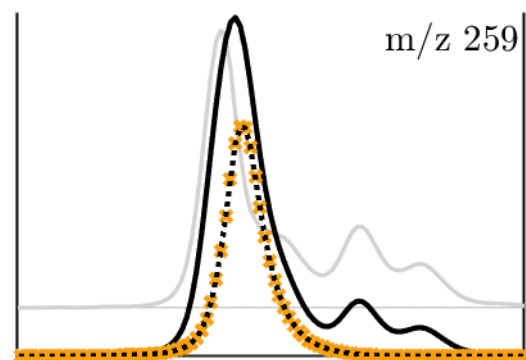



Free fit

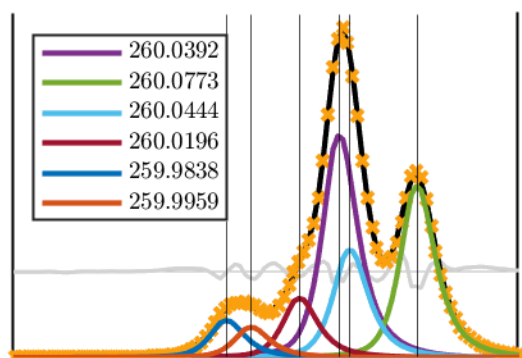

Final fit

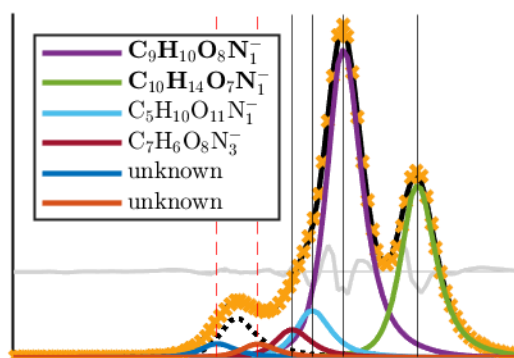

Manual fit

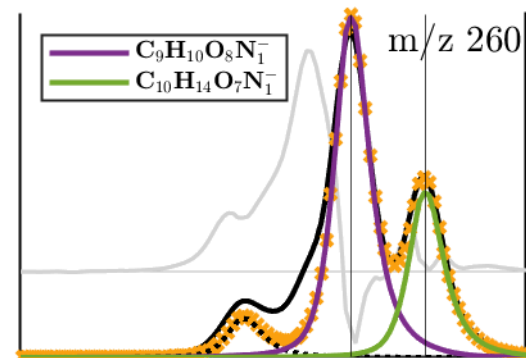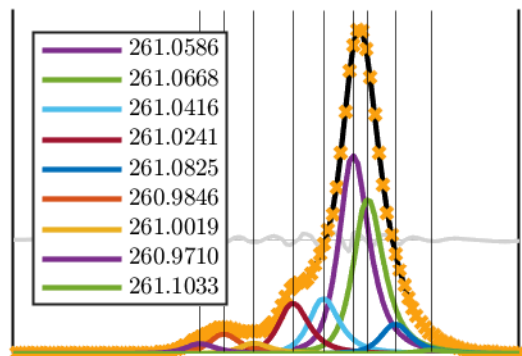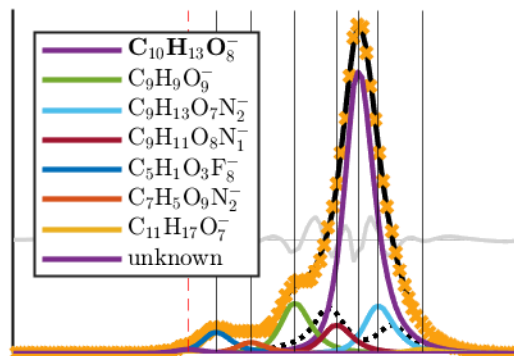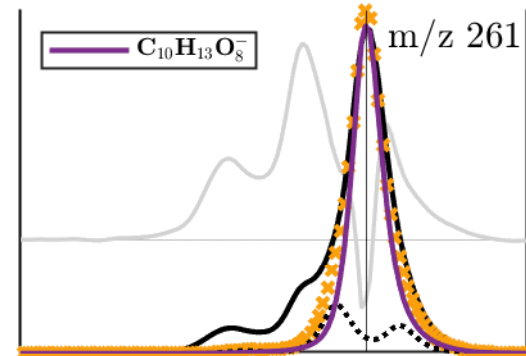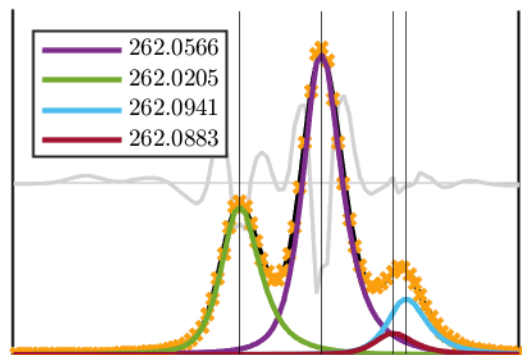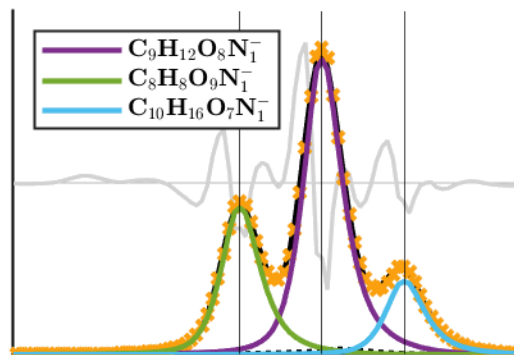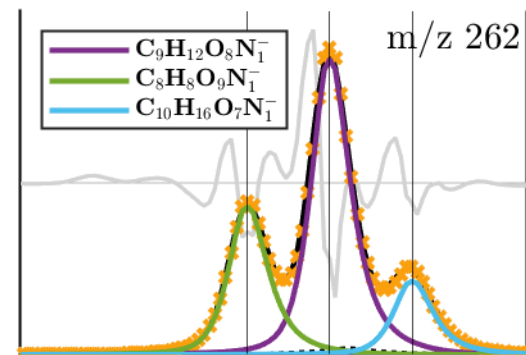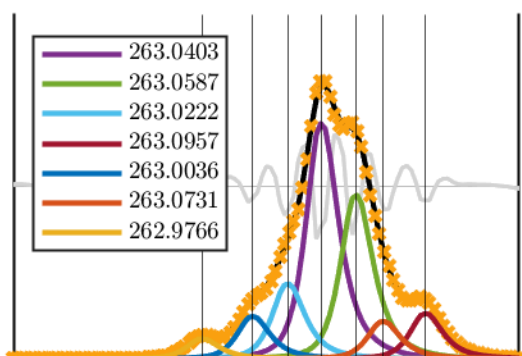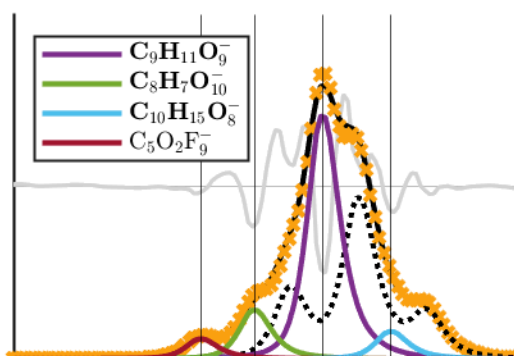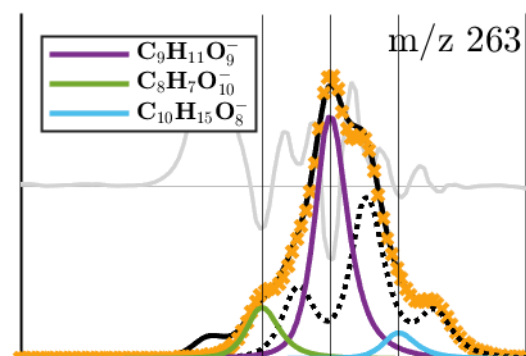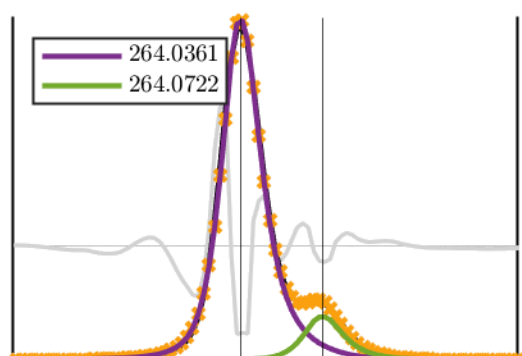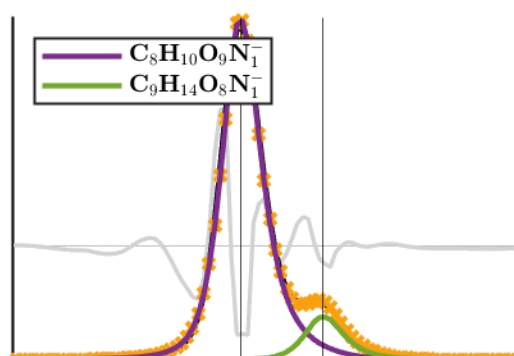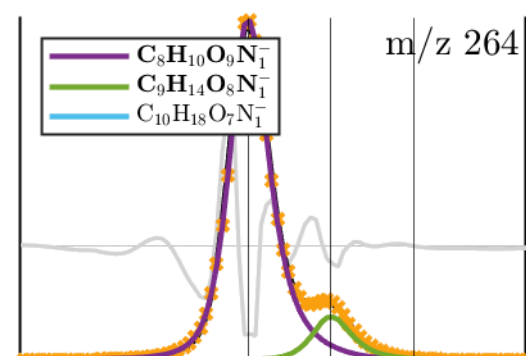

Free fit

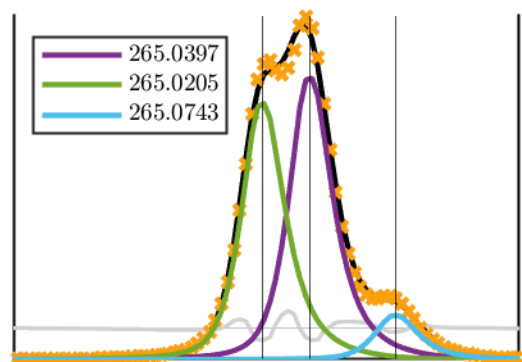

Final fit

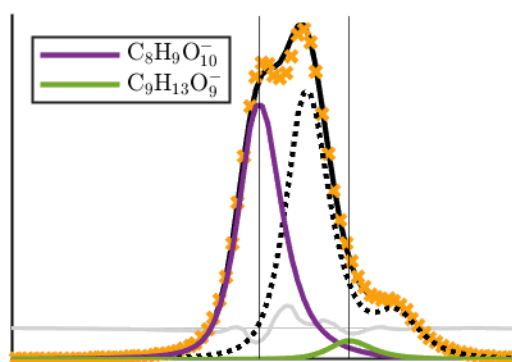

Manual fit

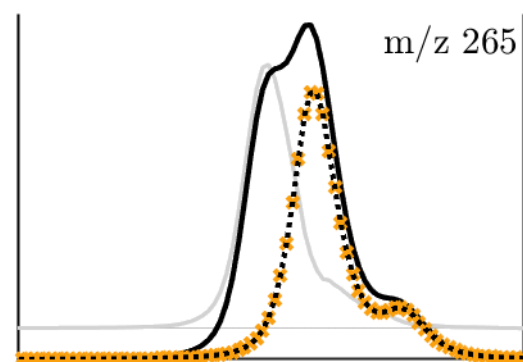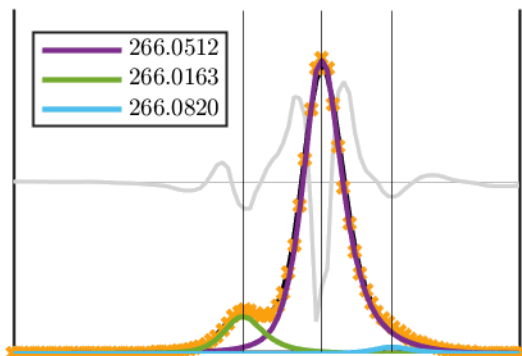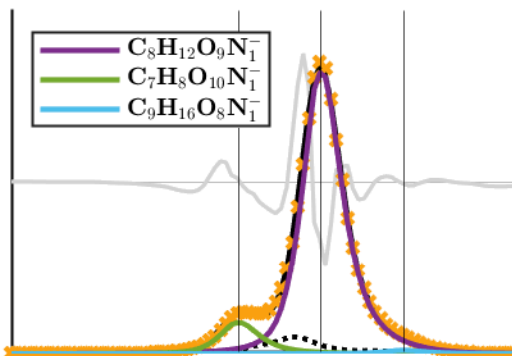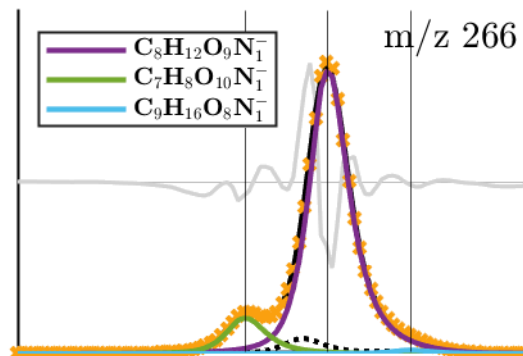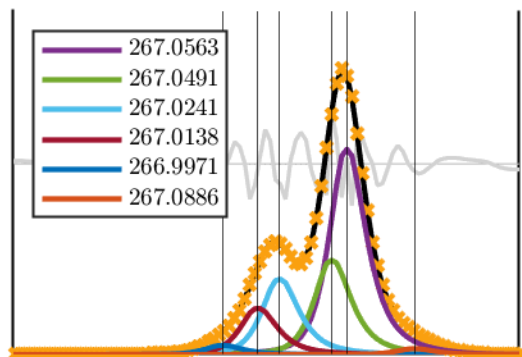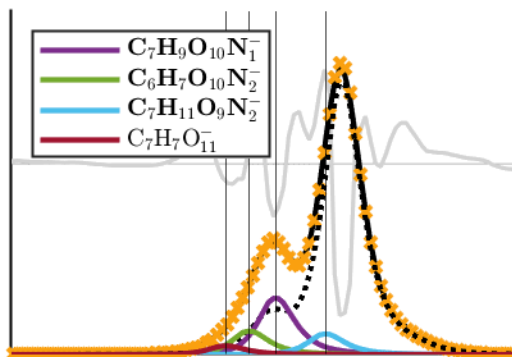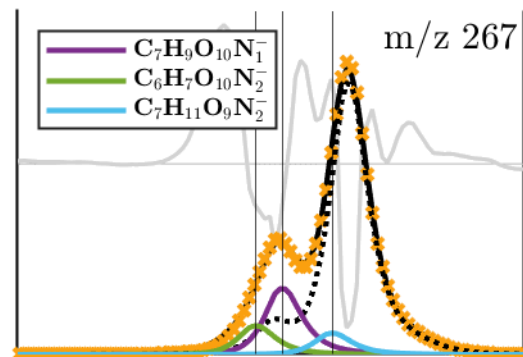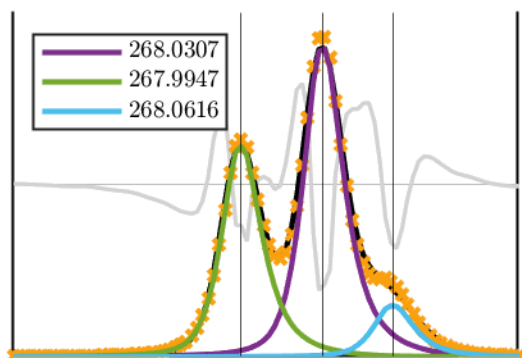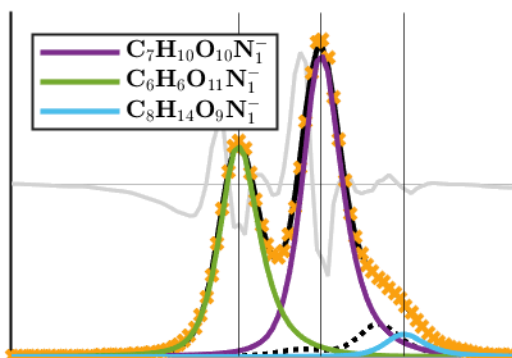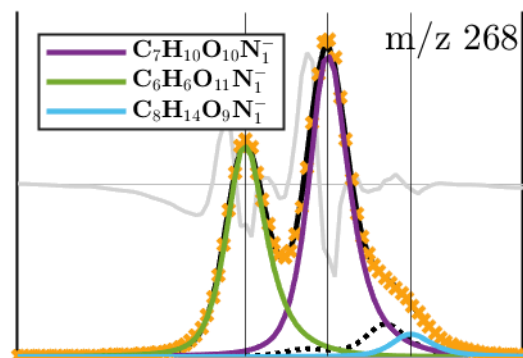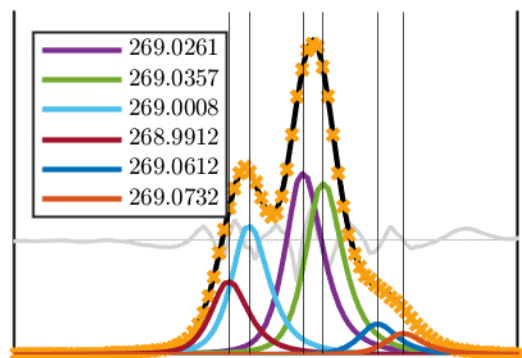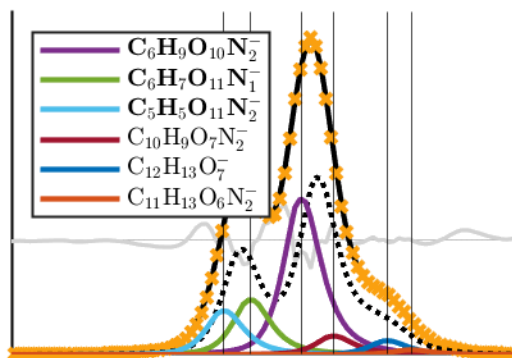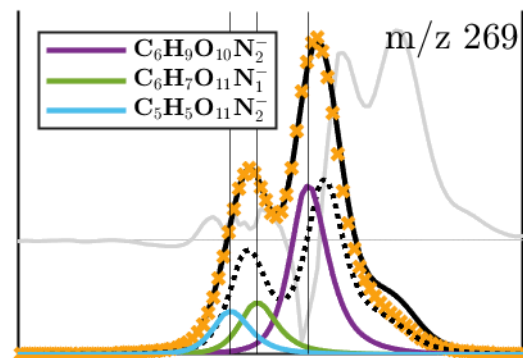

Free fit

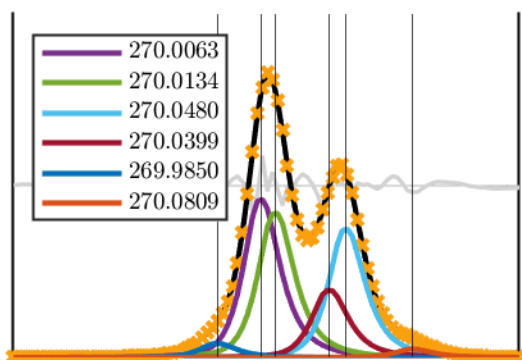

Final fit

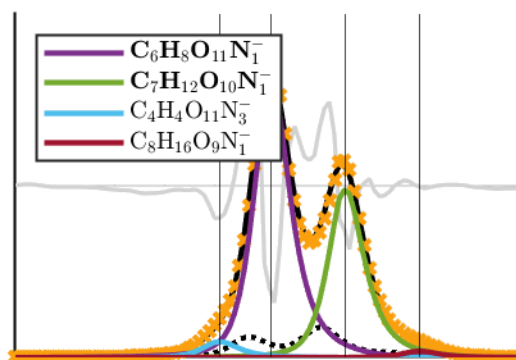

Manual fit

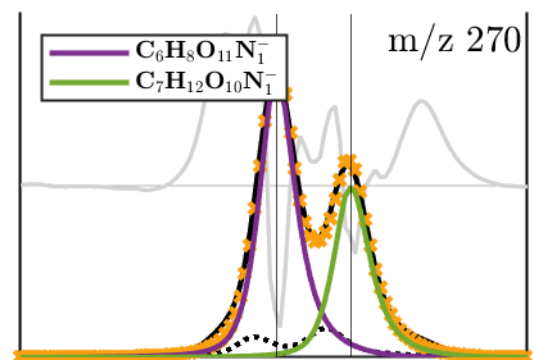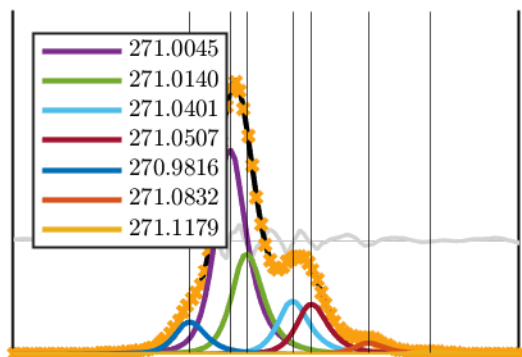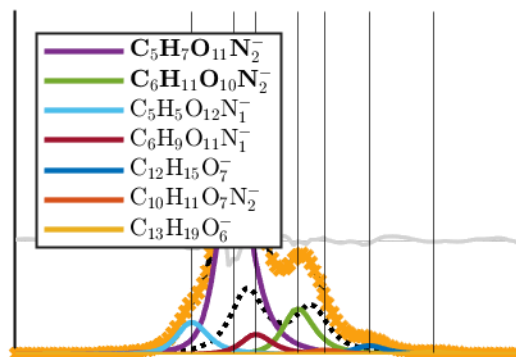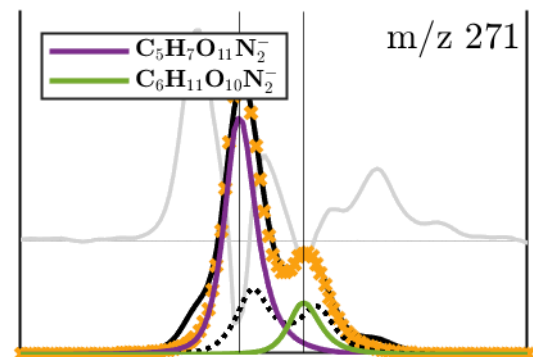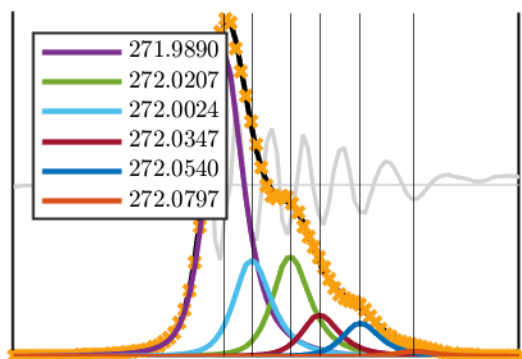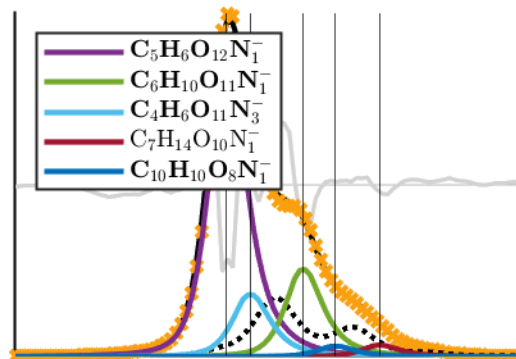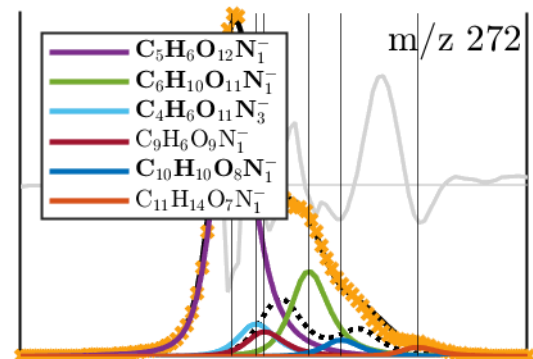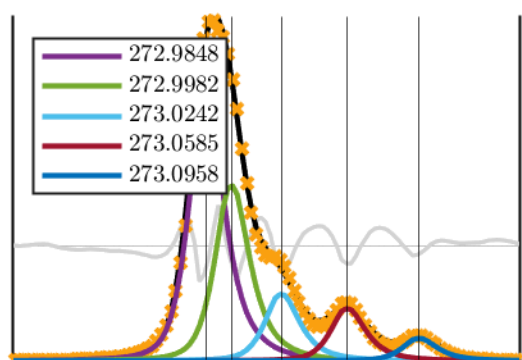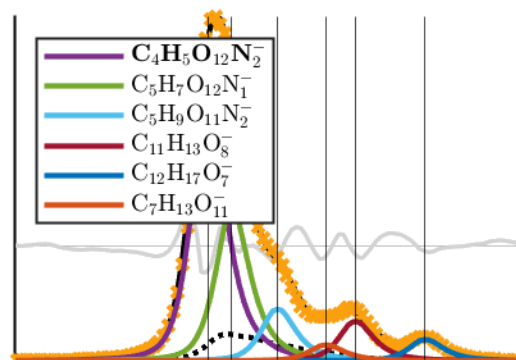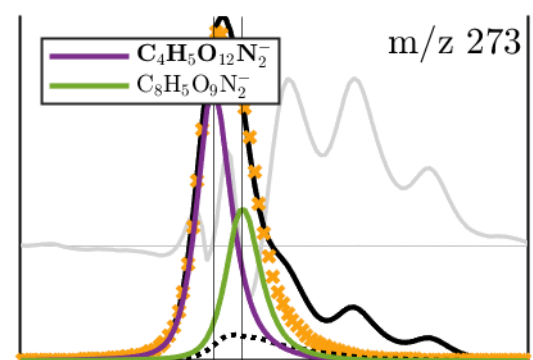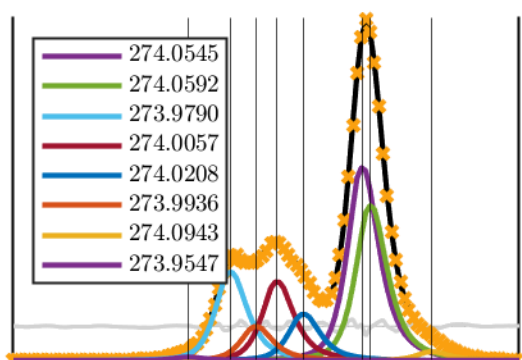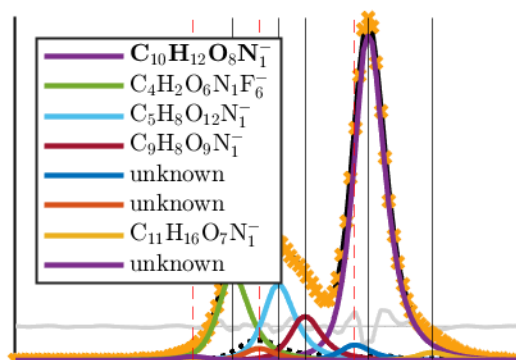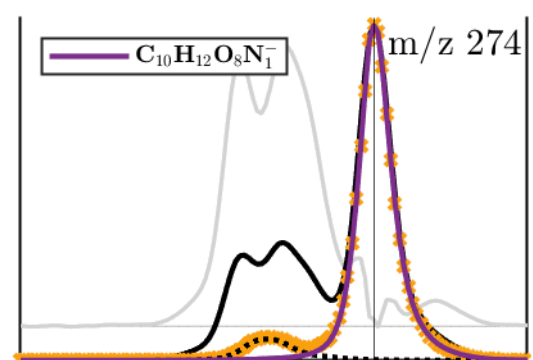

Free fit

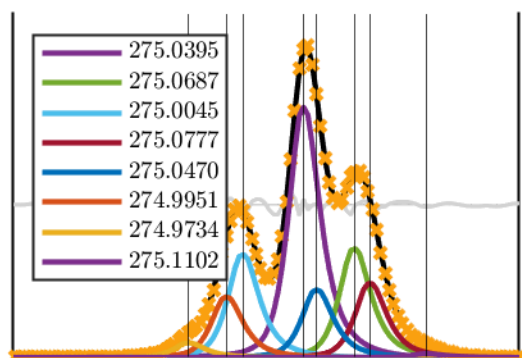

Final fit

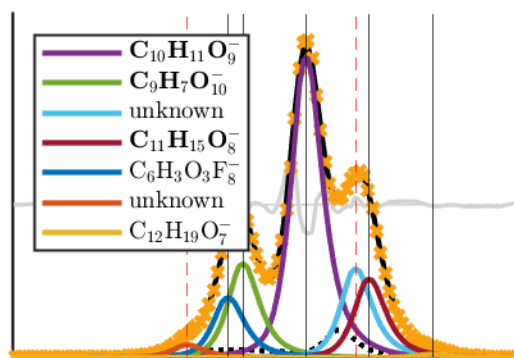

Manual fit

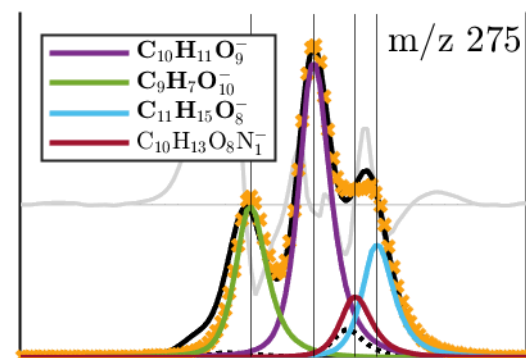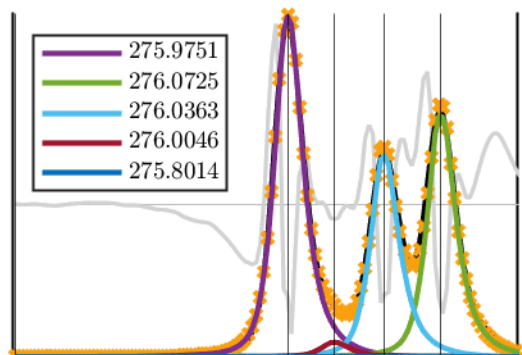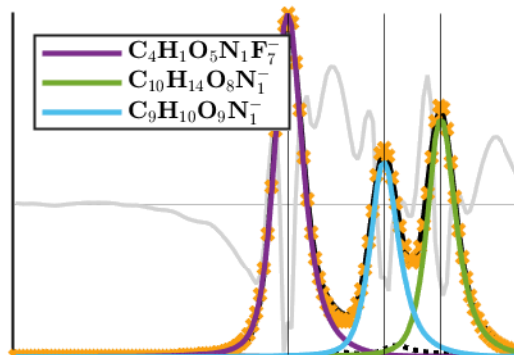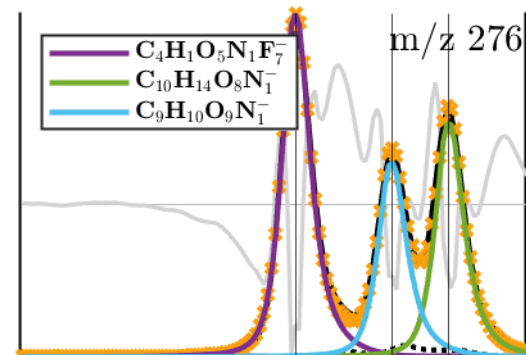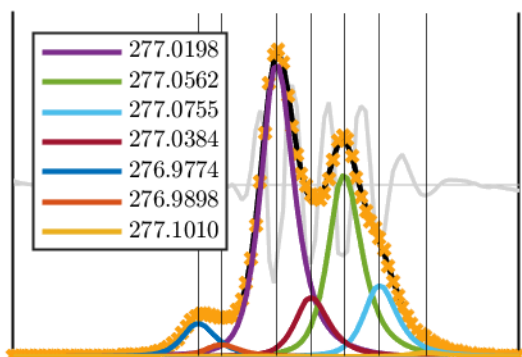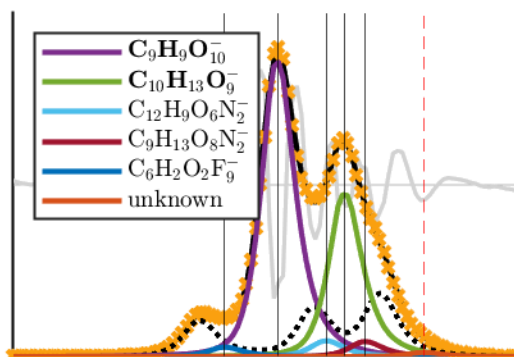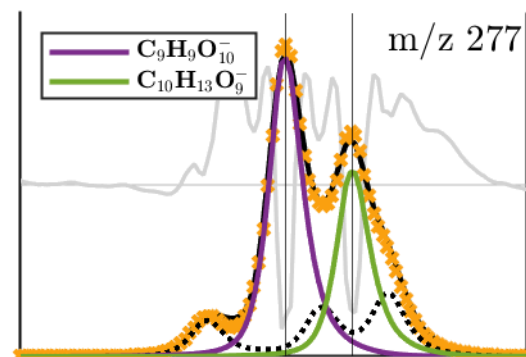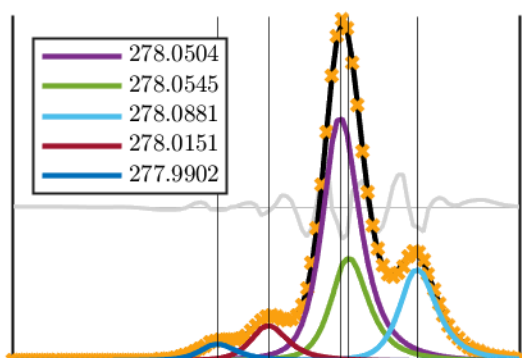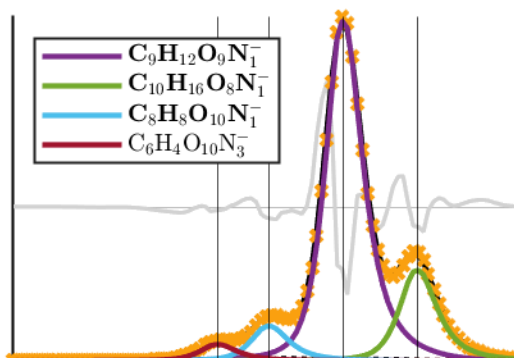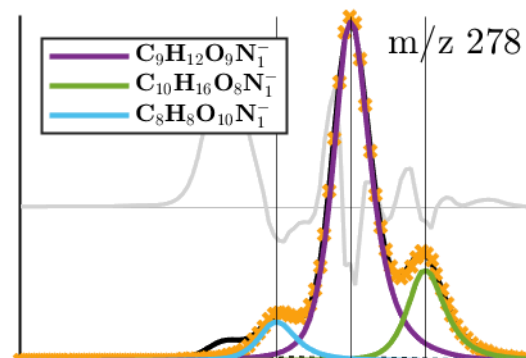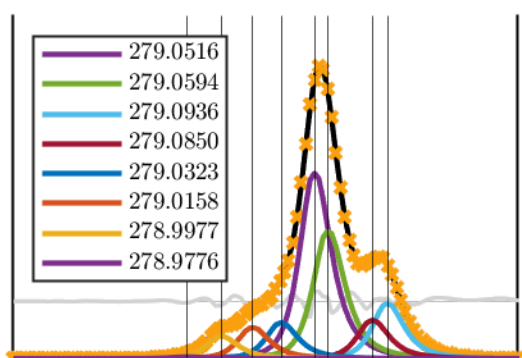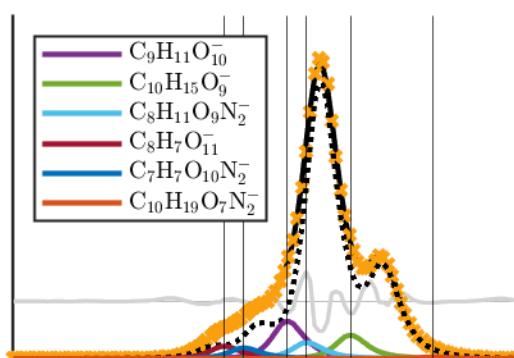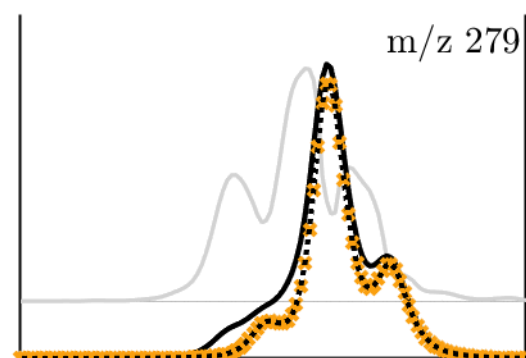



Free fit

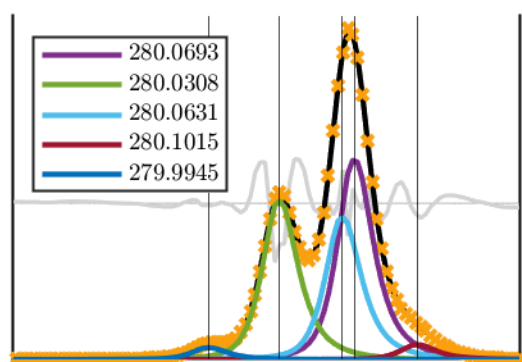

Final fit

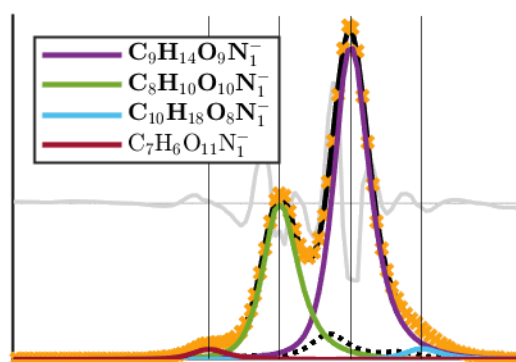

Manual fit

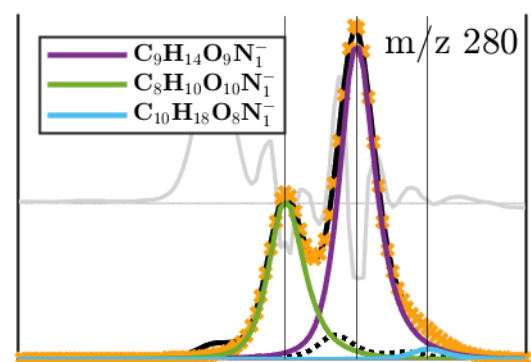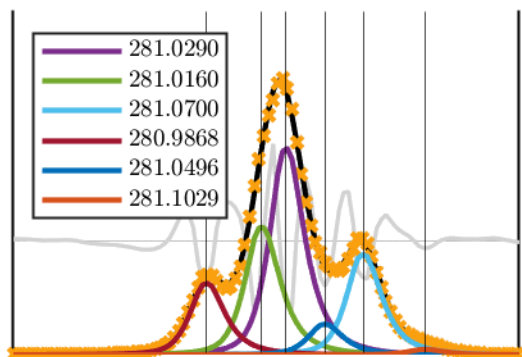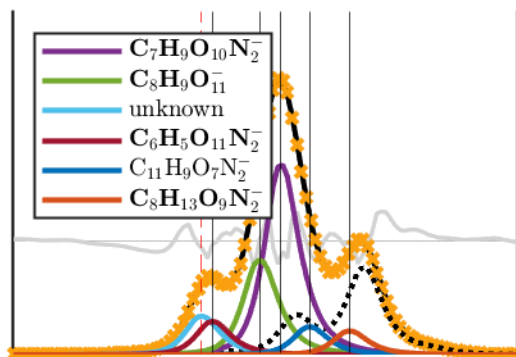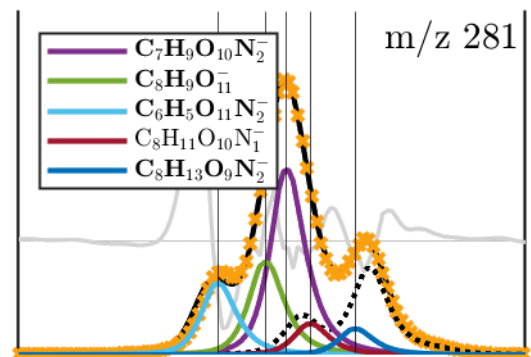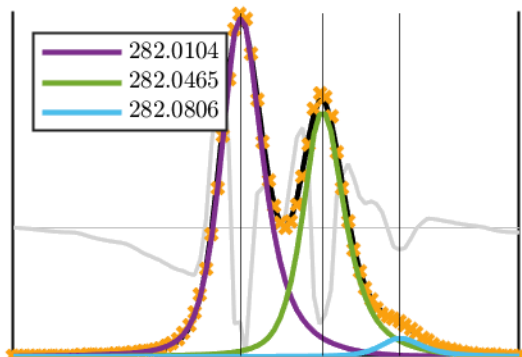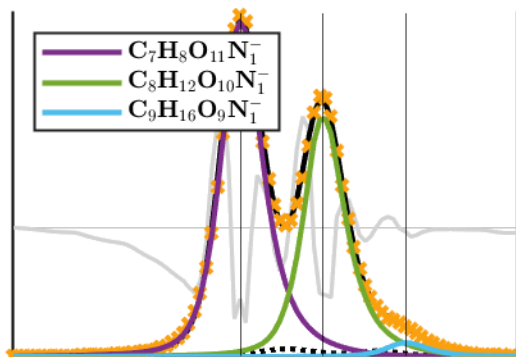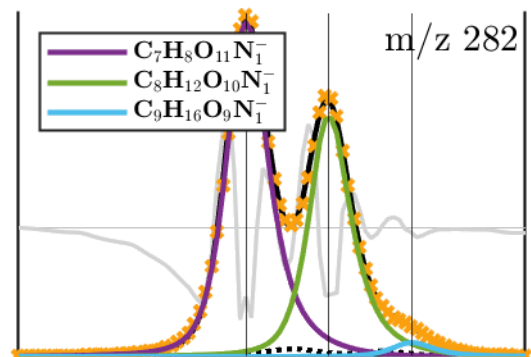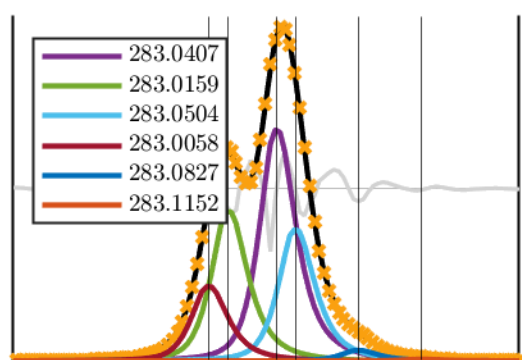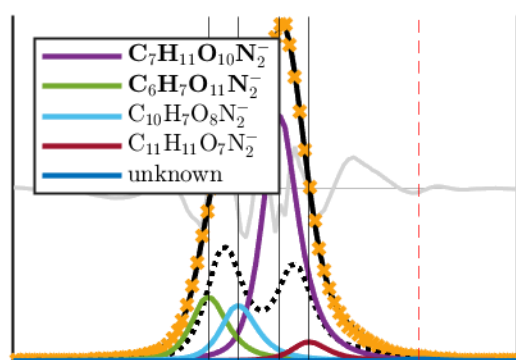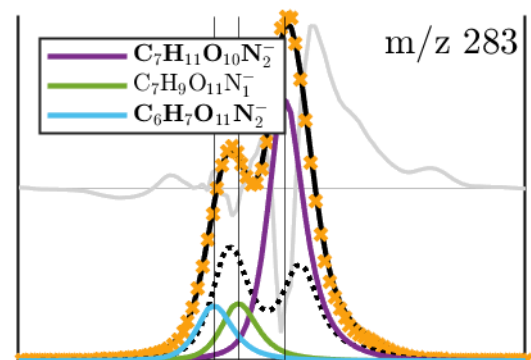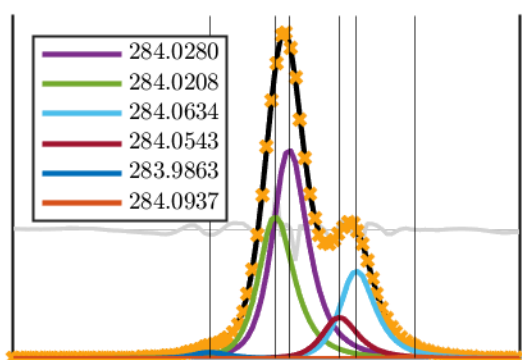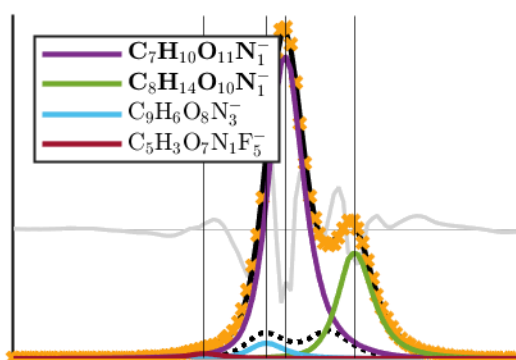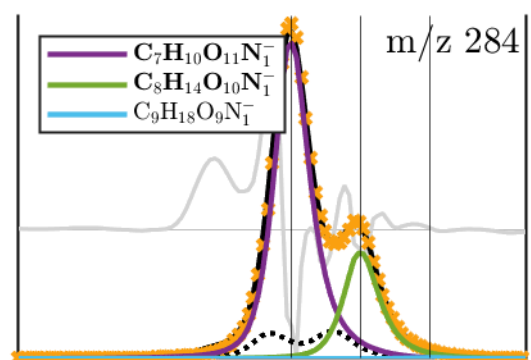

Free fit

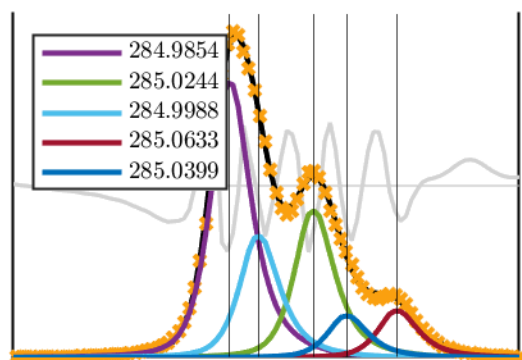

Final fit

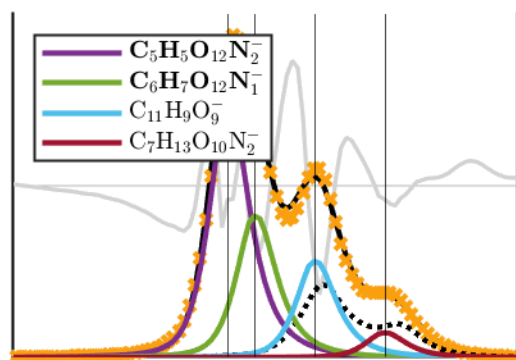

Manual fit

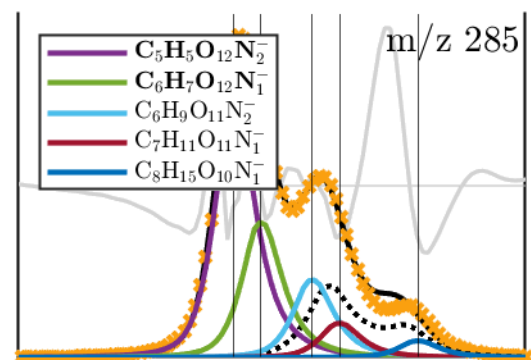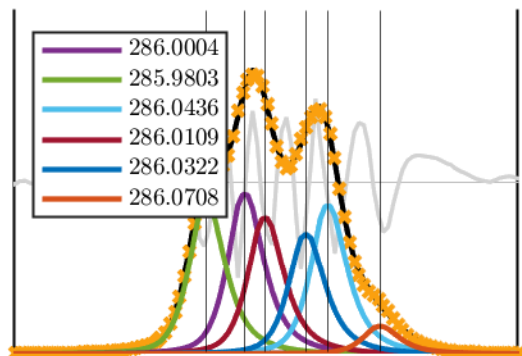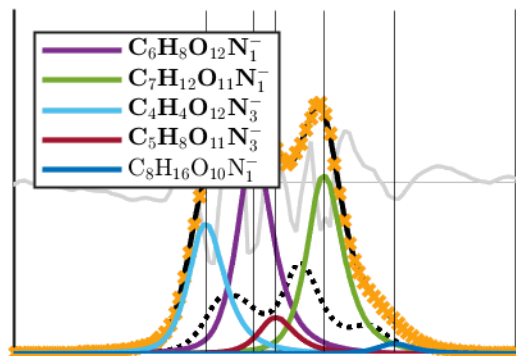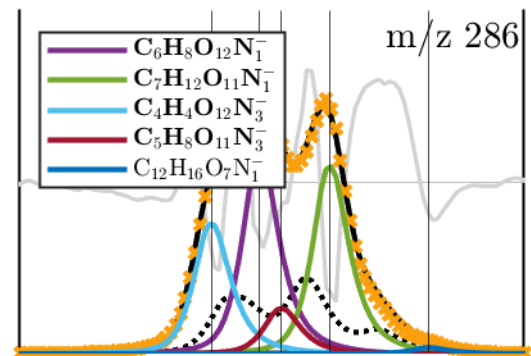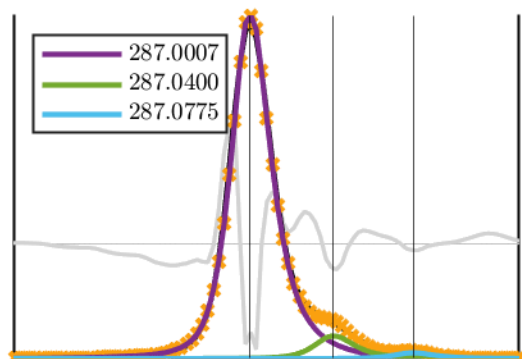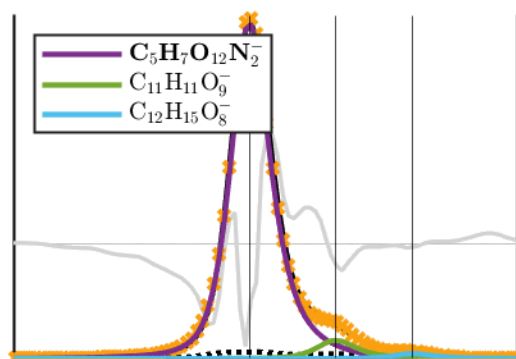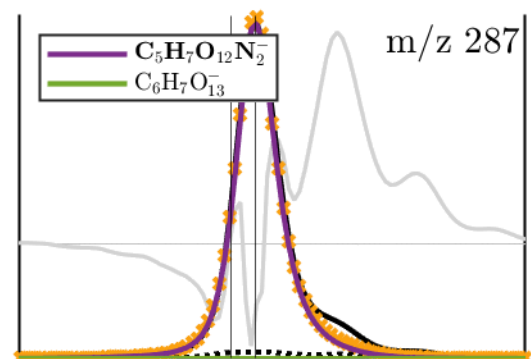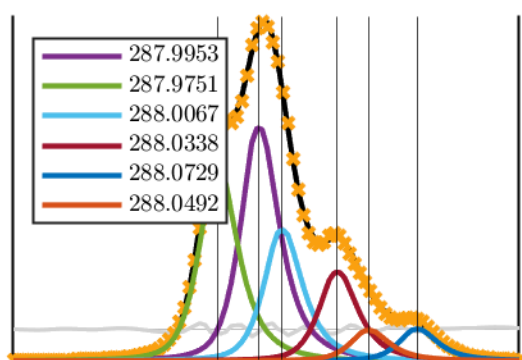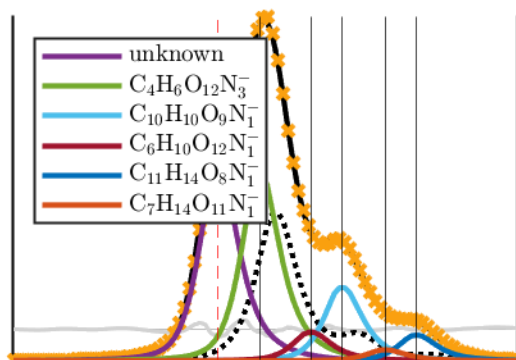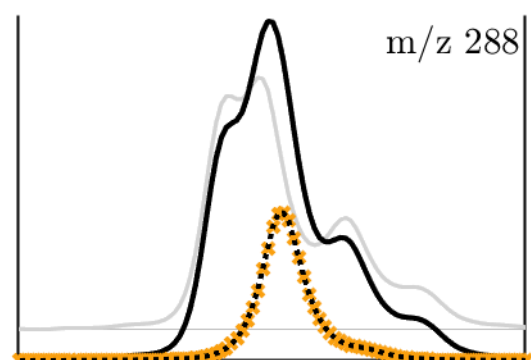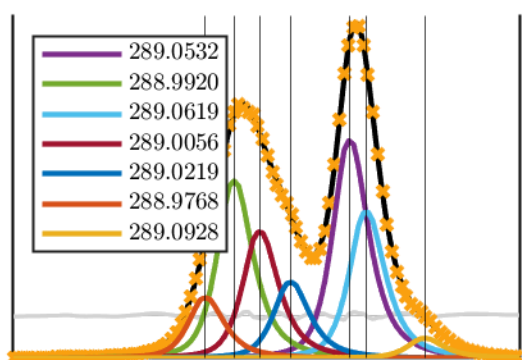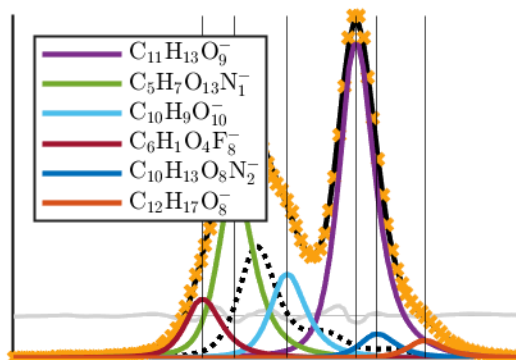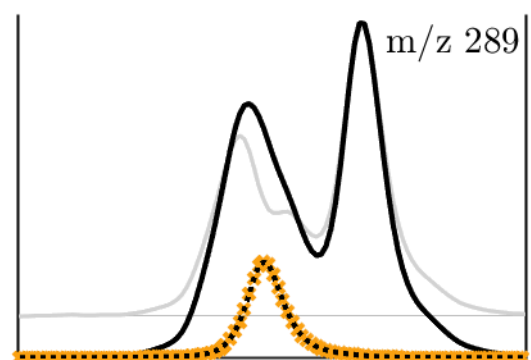

Free fit

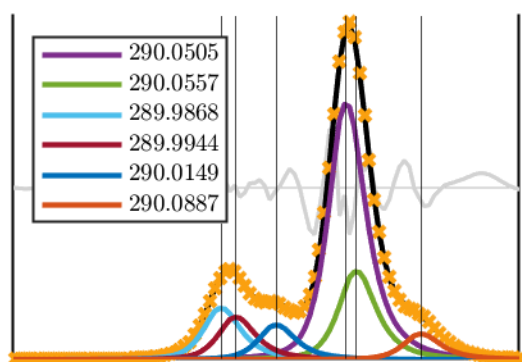

Final fit

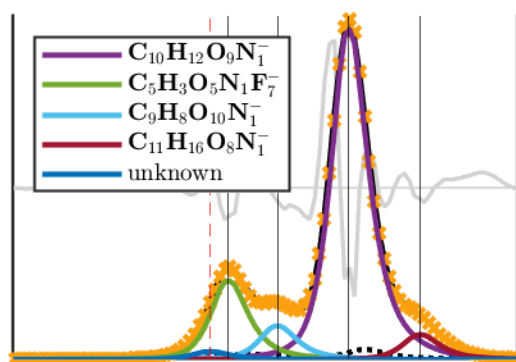

Manual fit

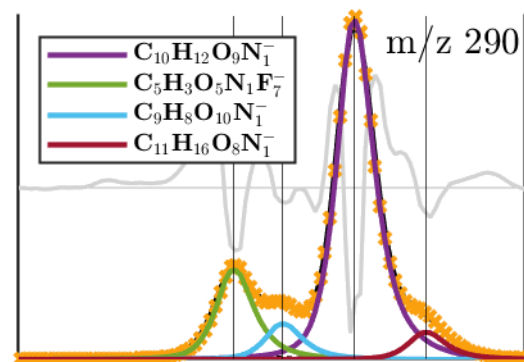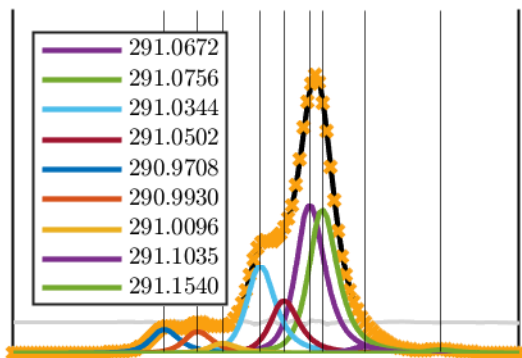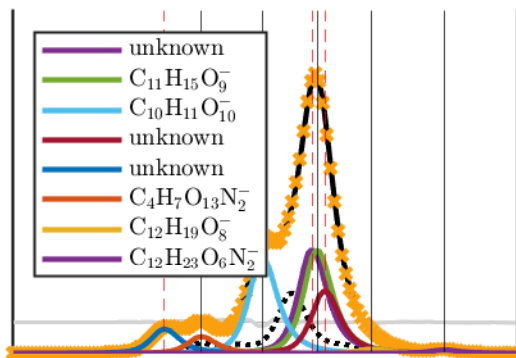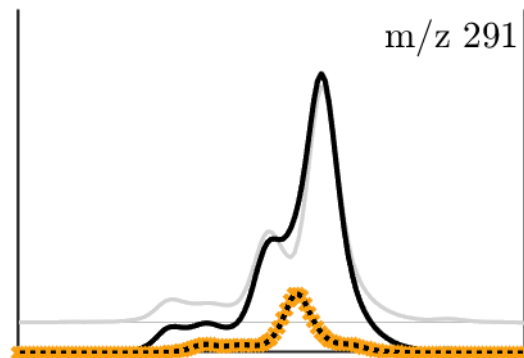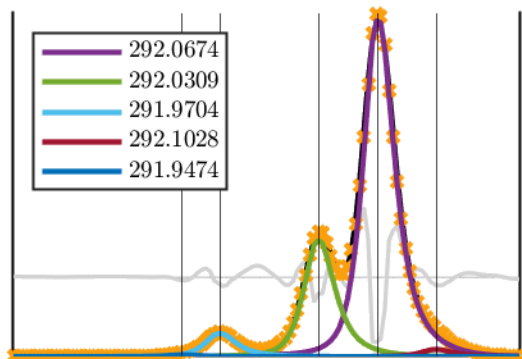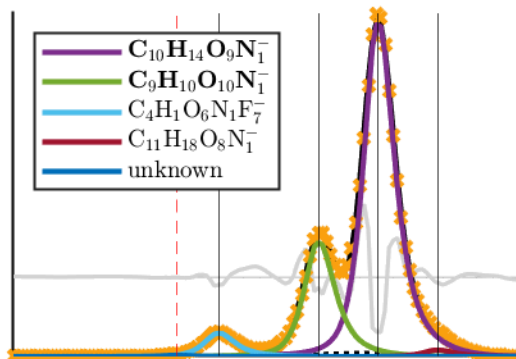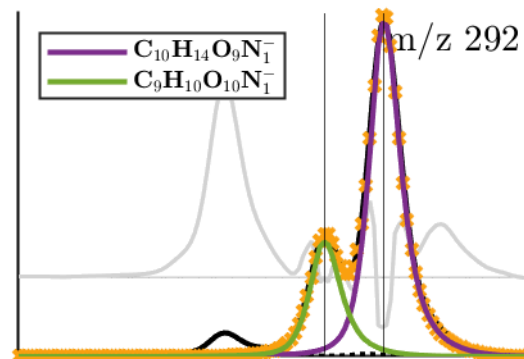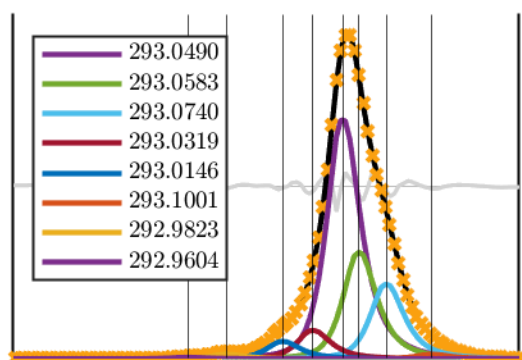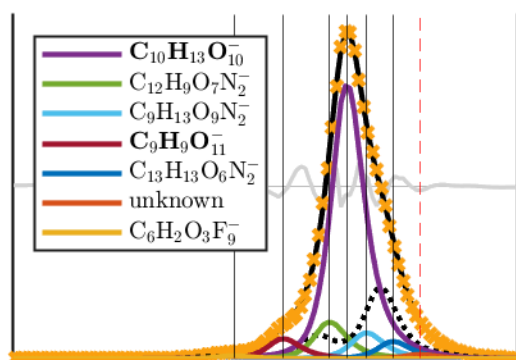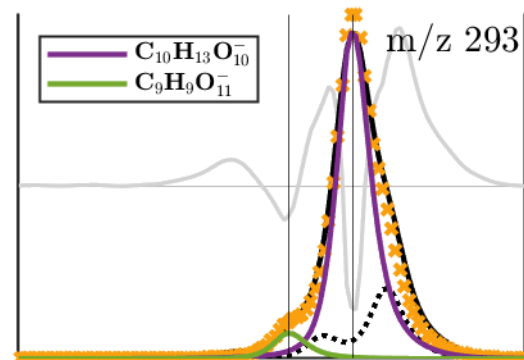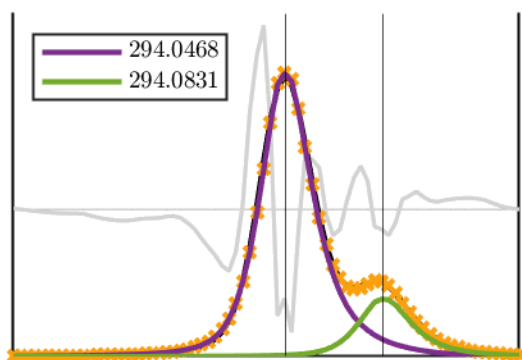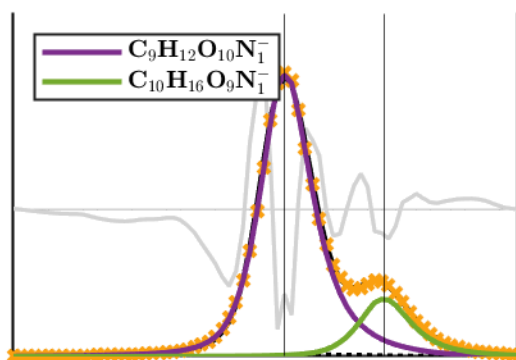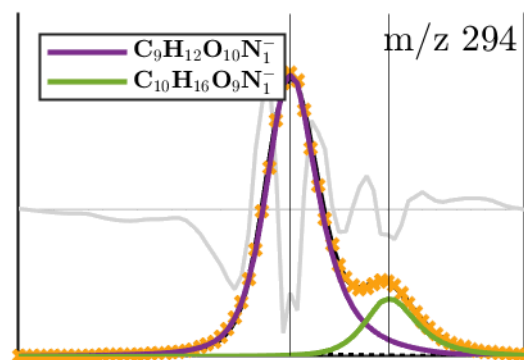



Free fit

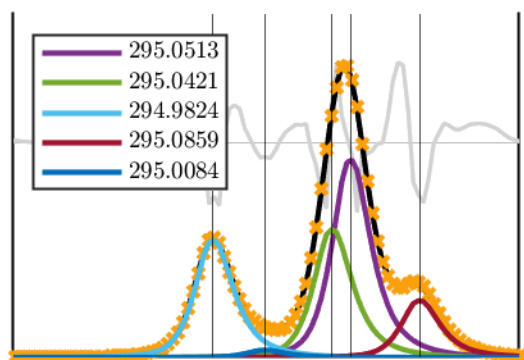

Final fit

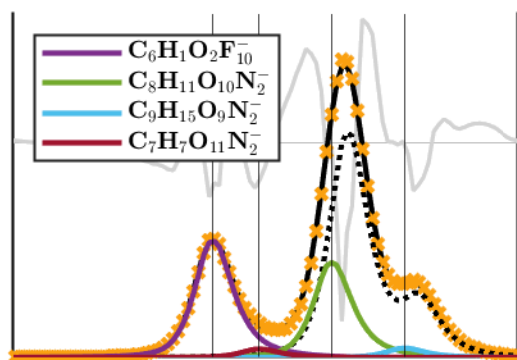

Manual fit

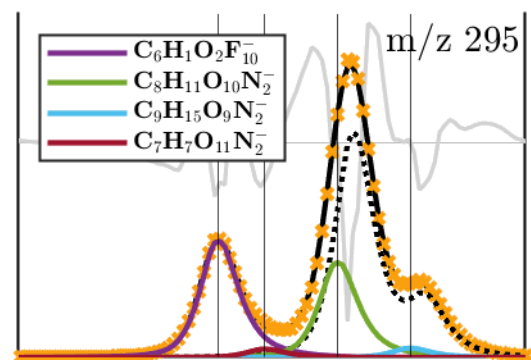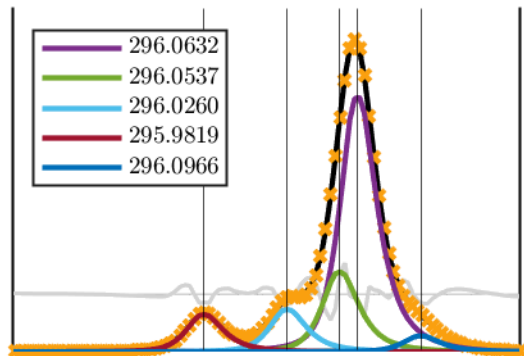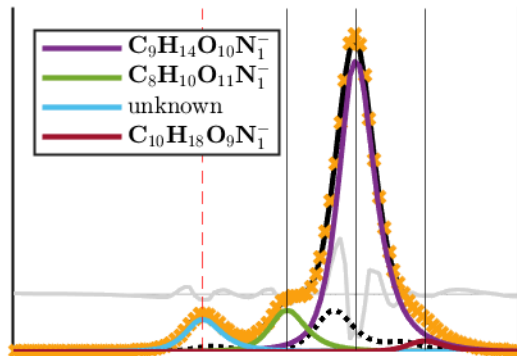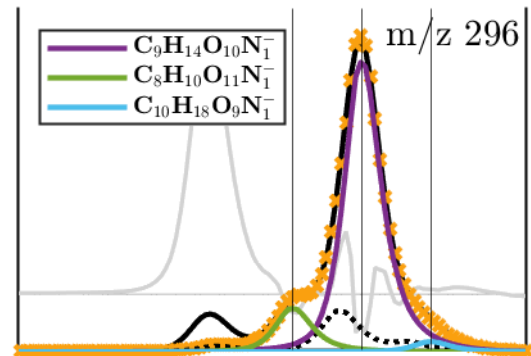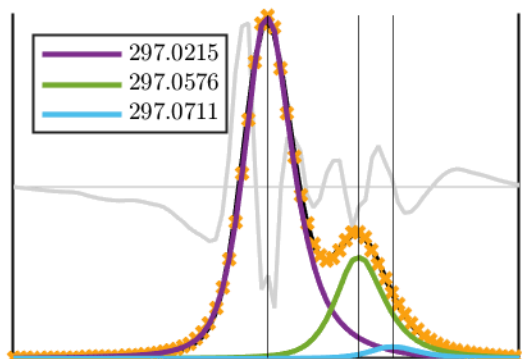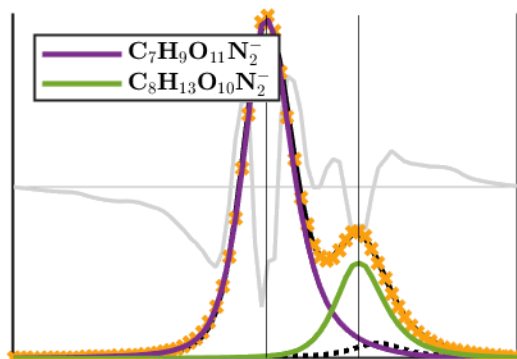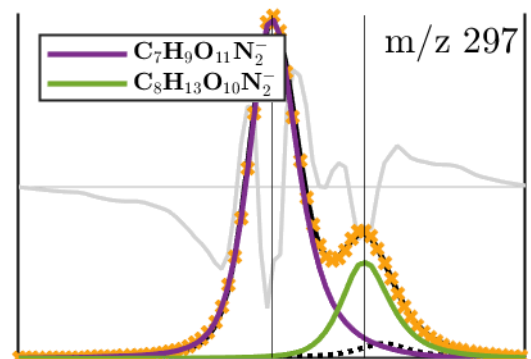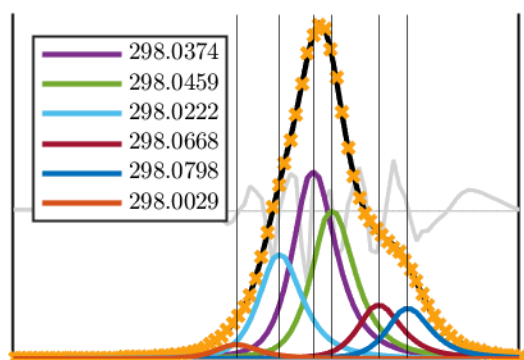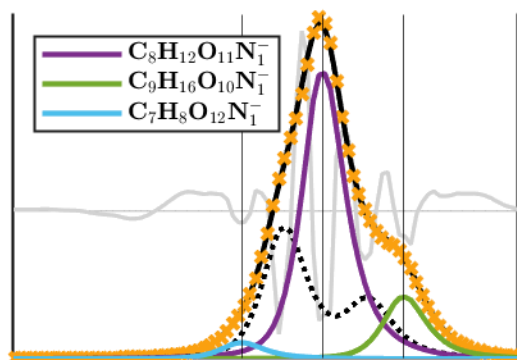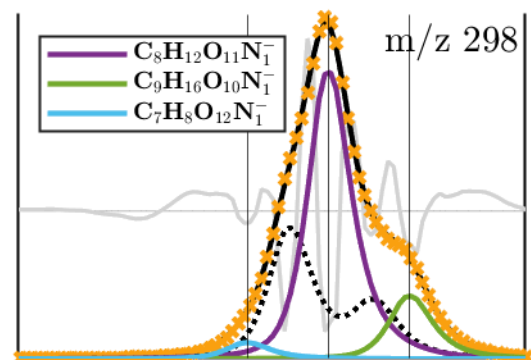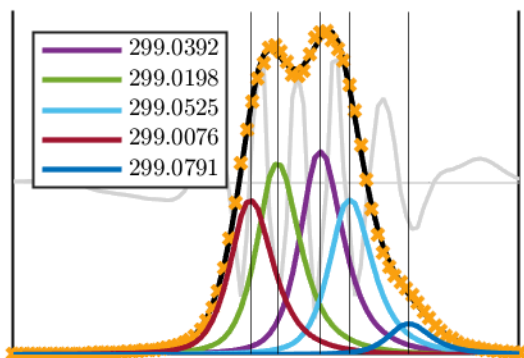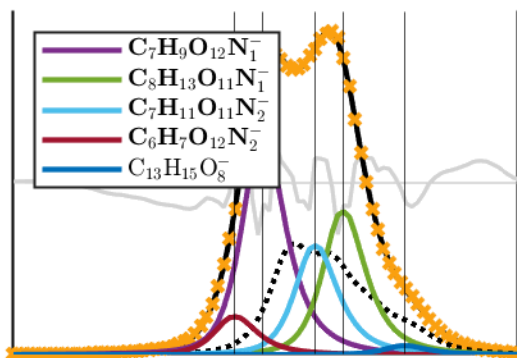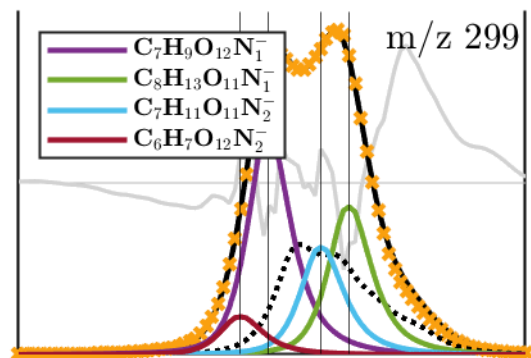



Free fit

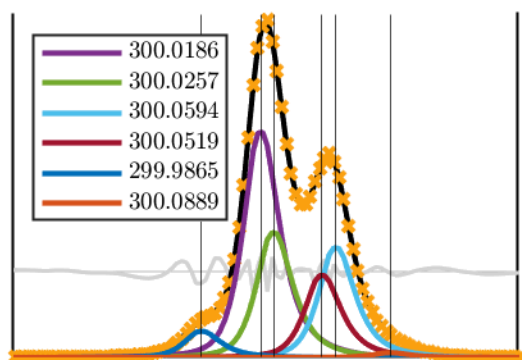

Final fit

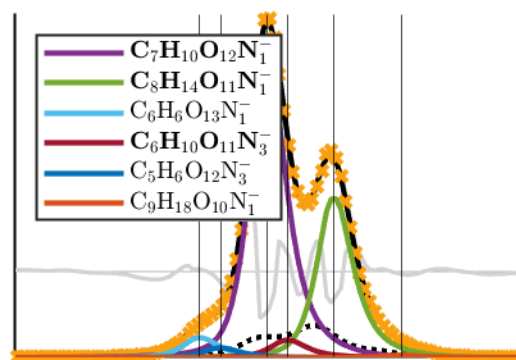

Manual fit

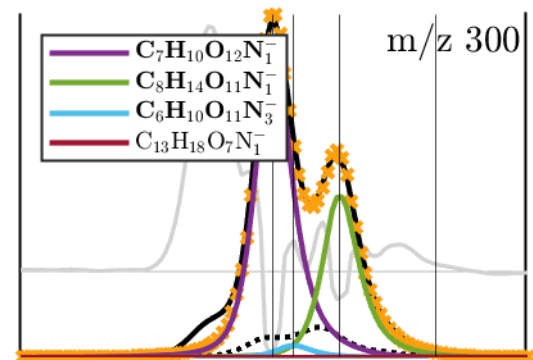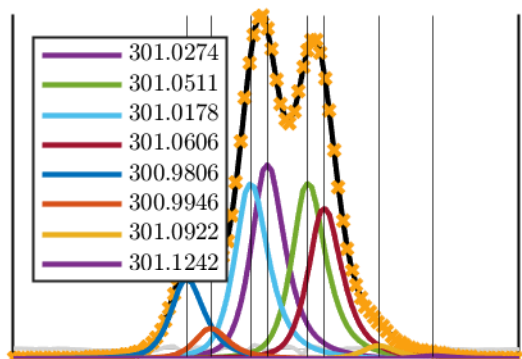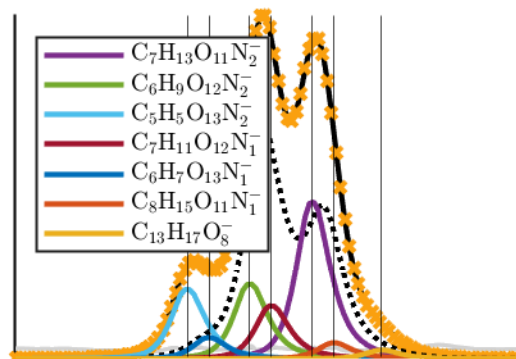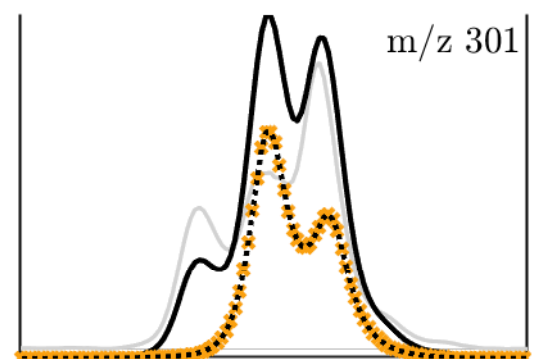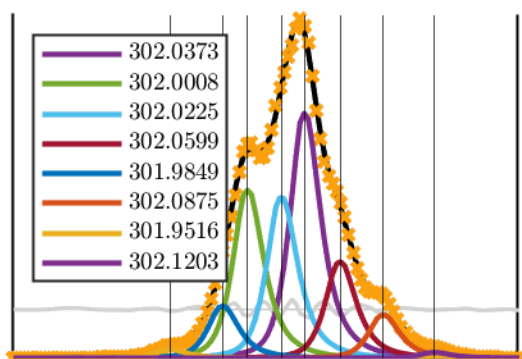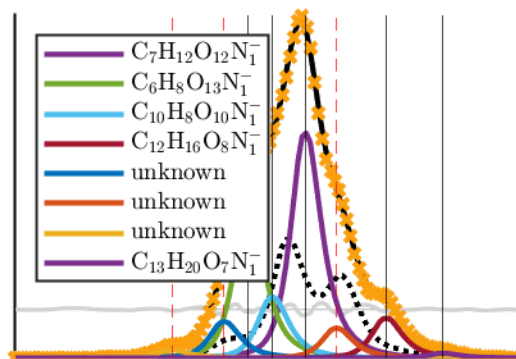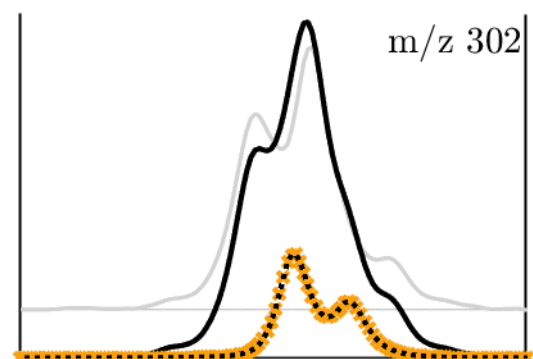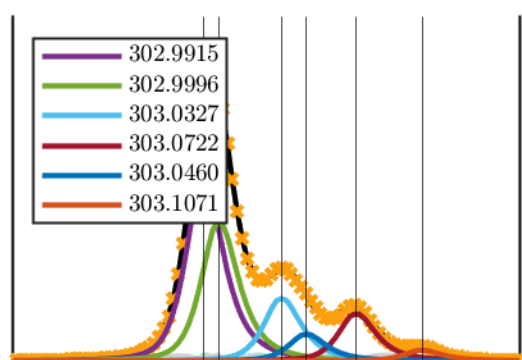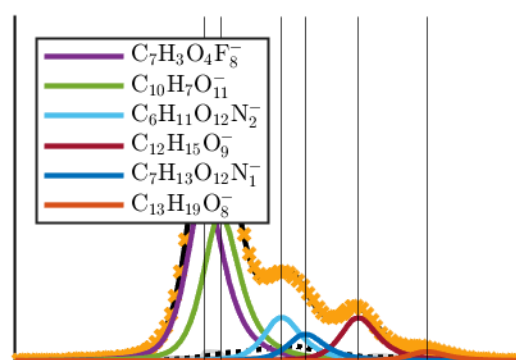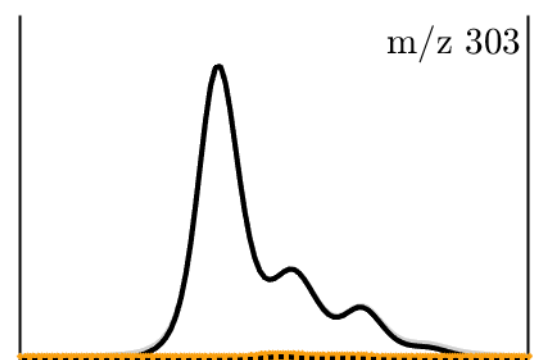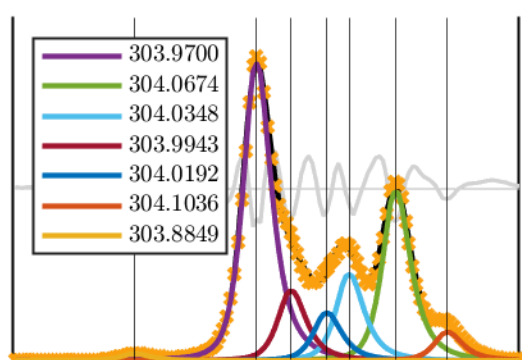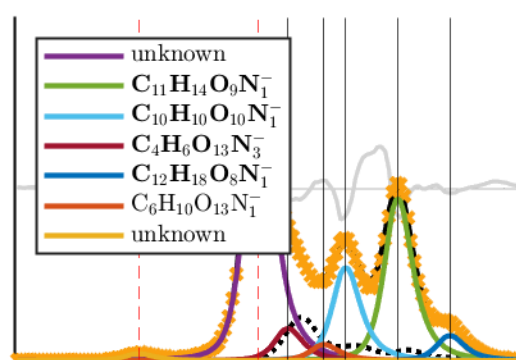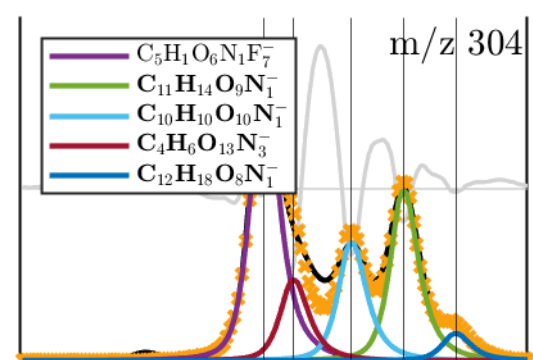

Free fit

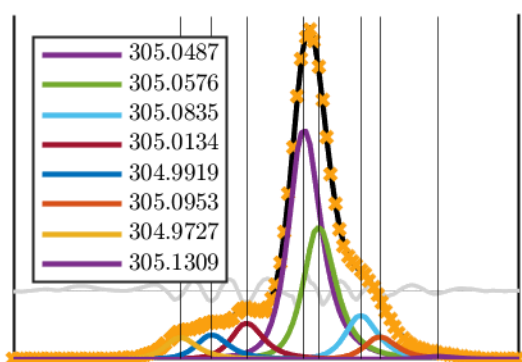

Final fit

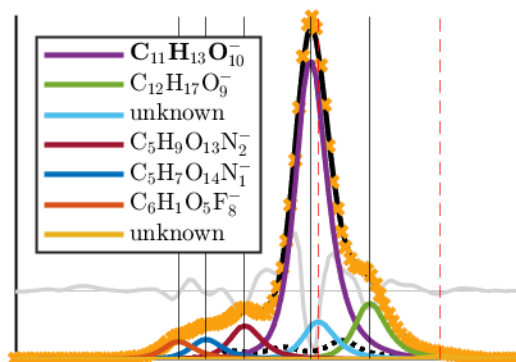

Manual fit

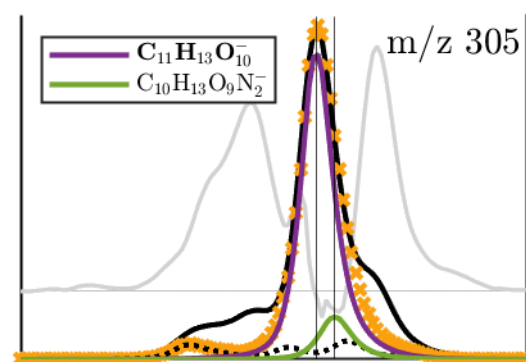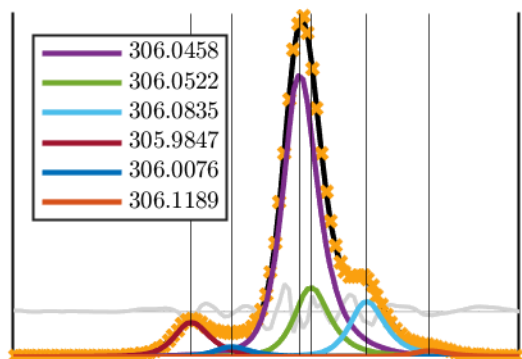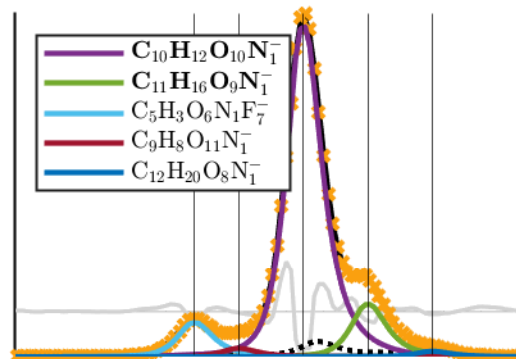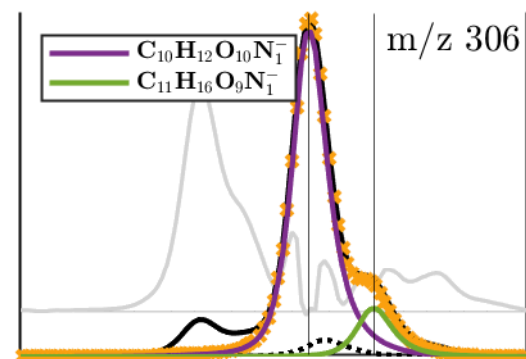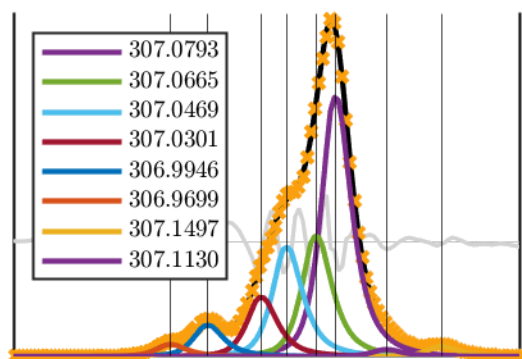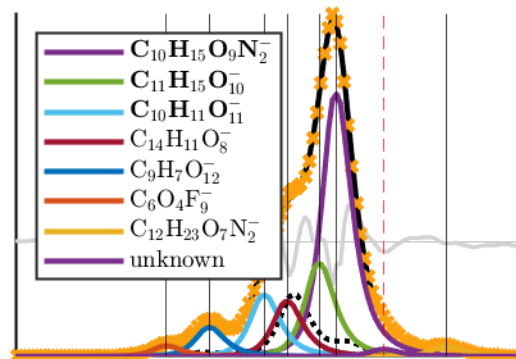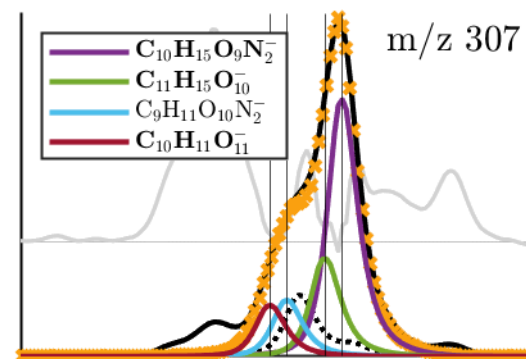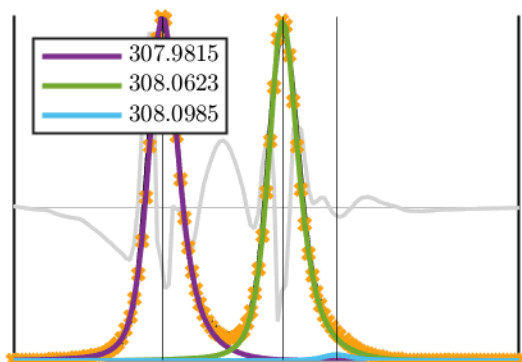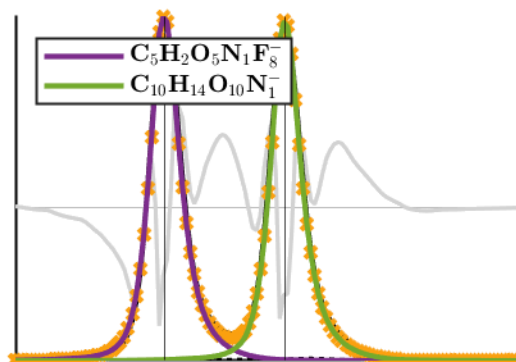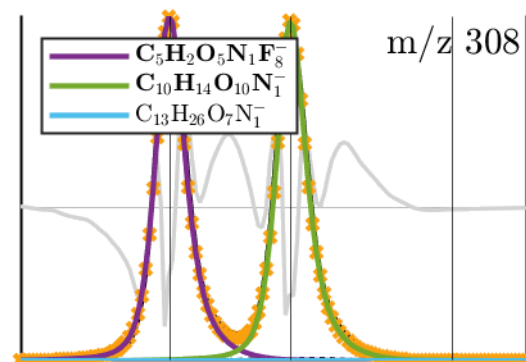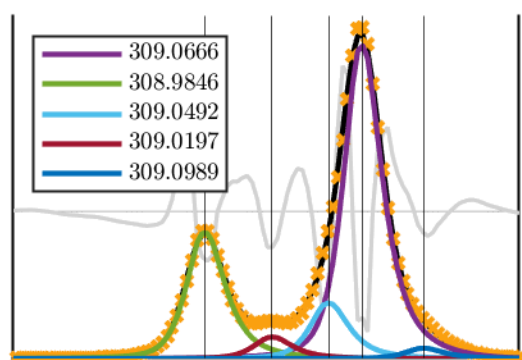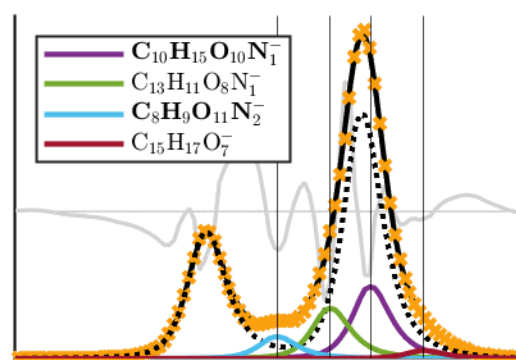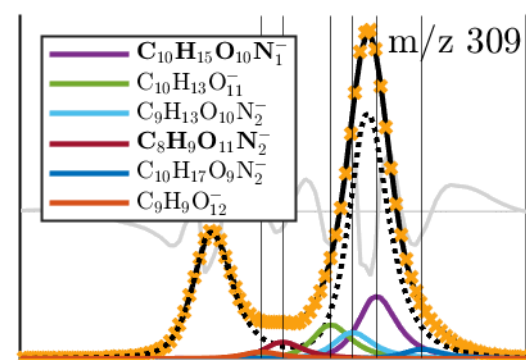

Free fit

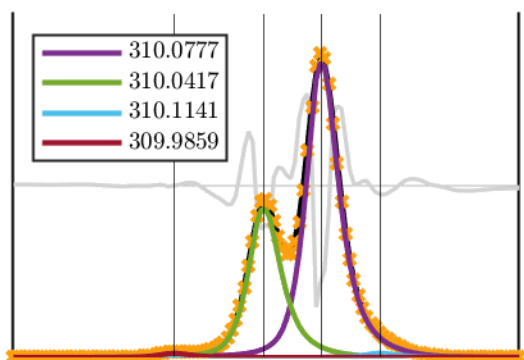

Final fit

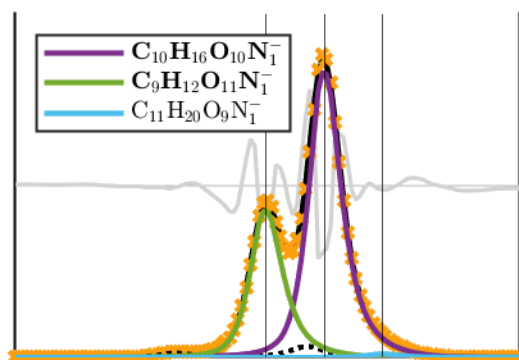

Manual fit

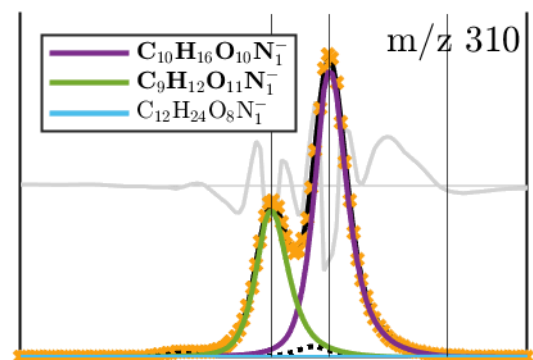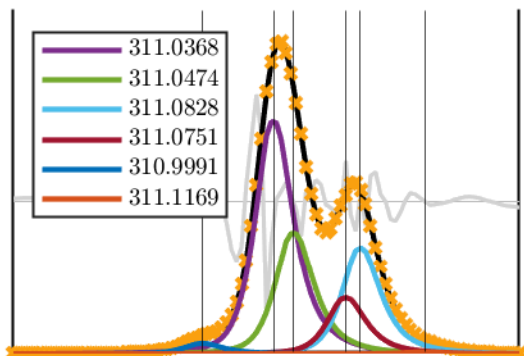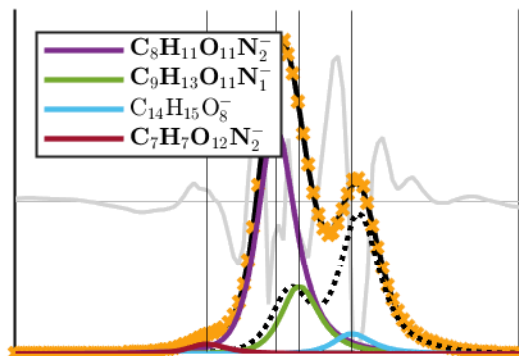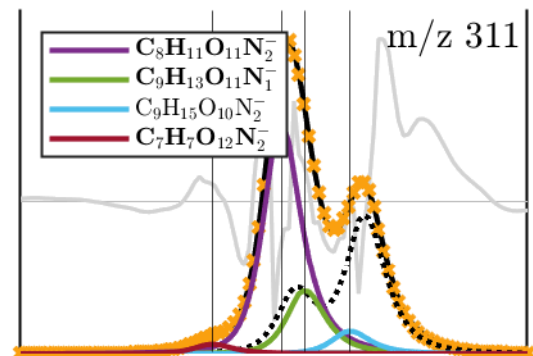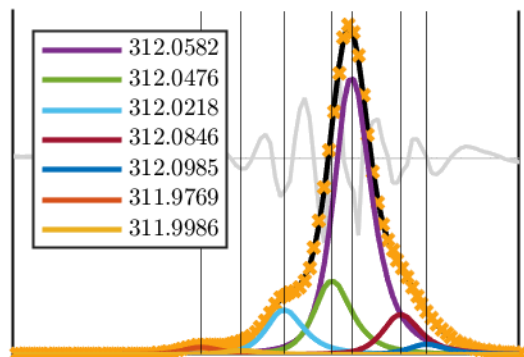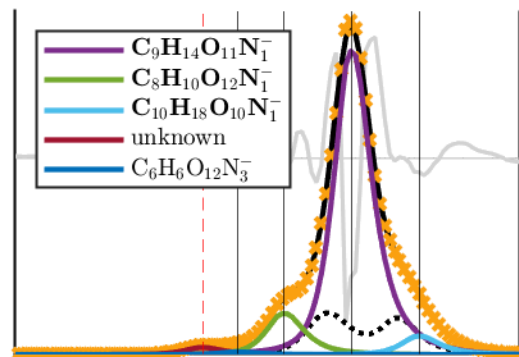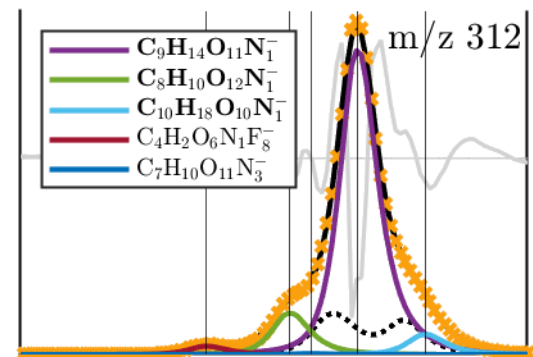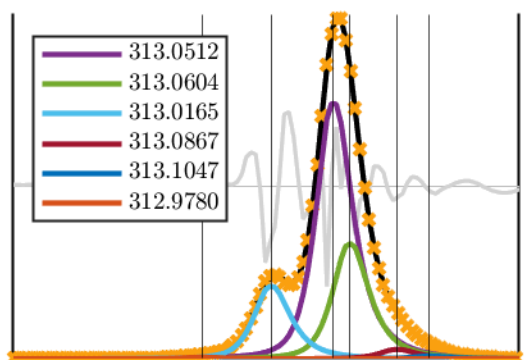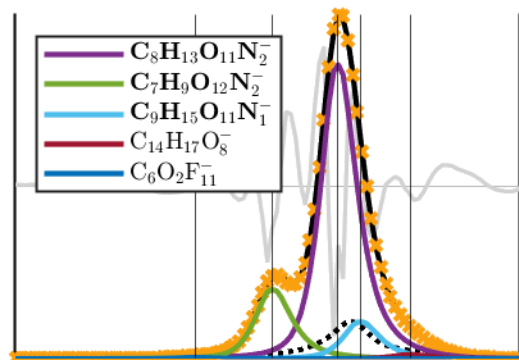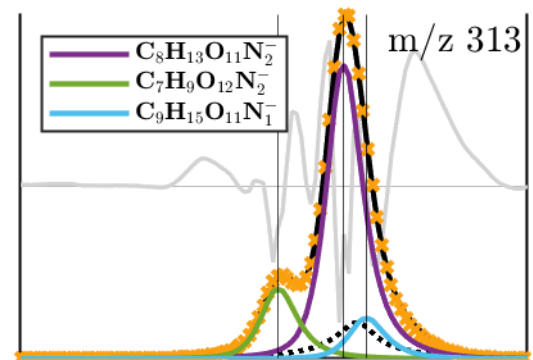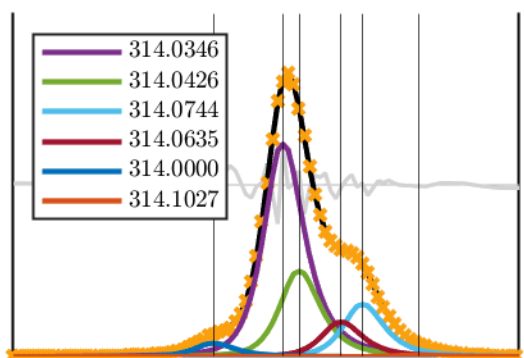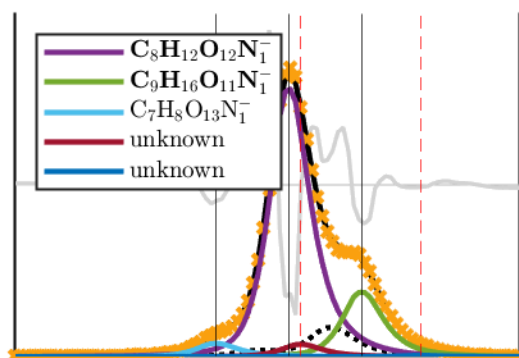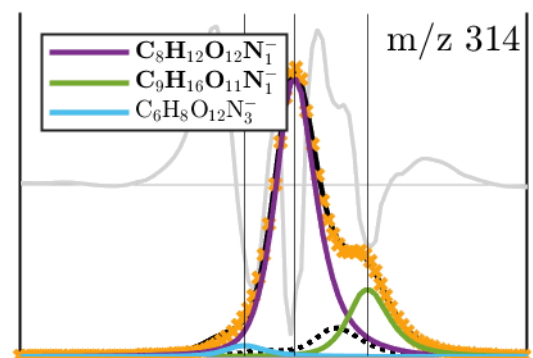



Free fit

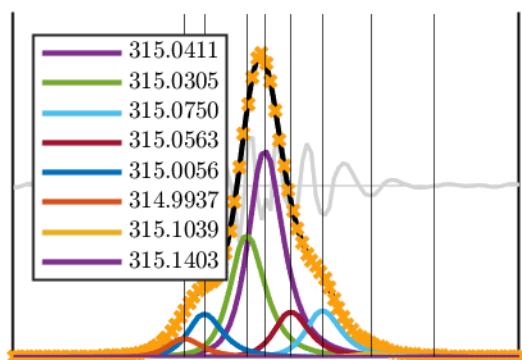

Final fit

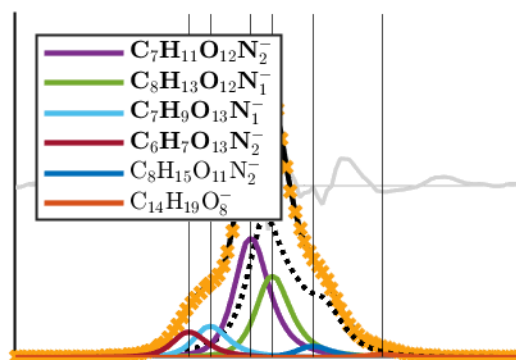

Manual fit

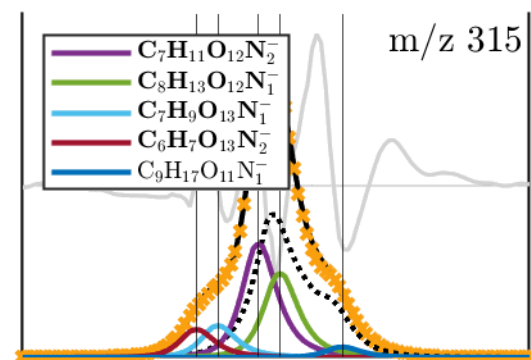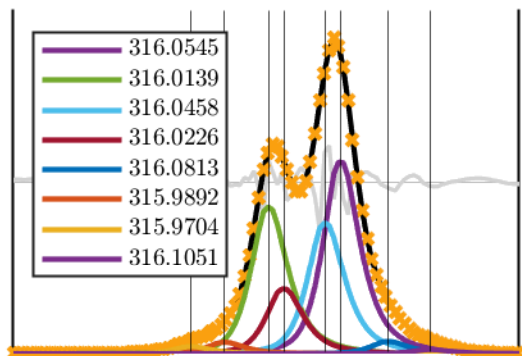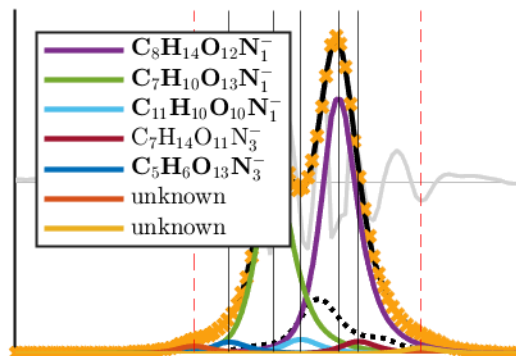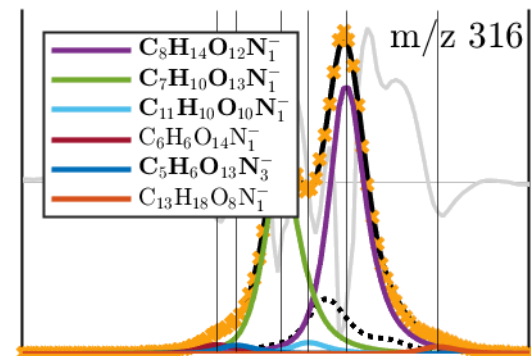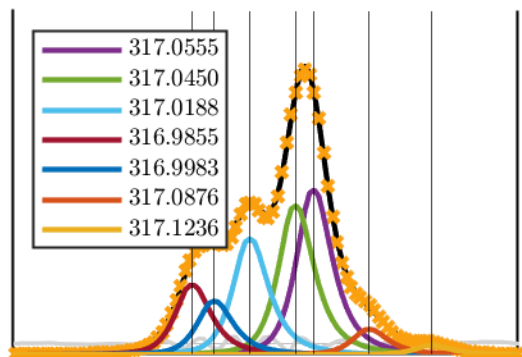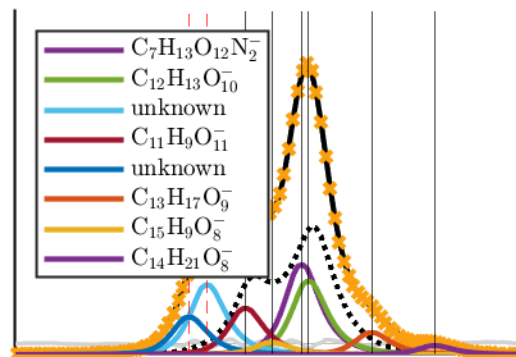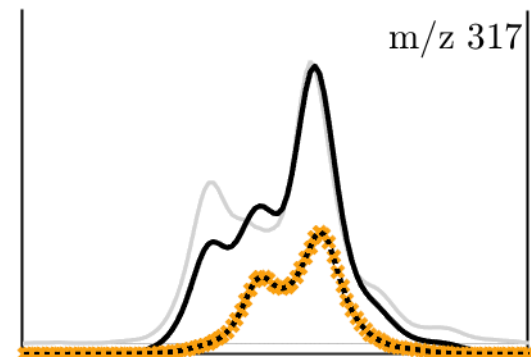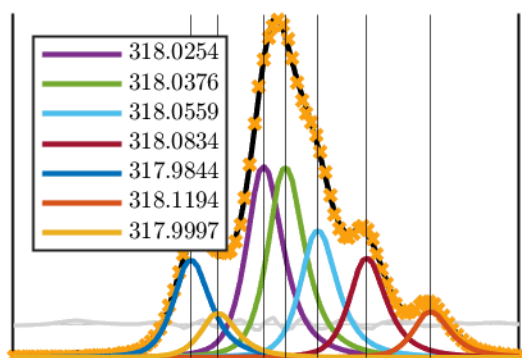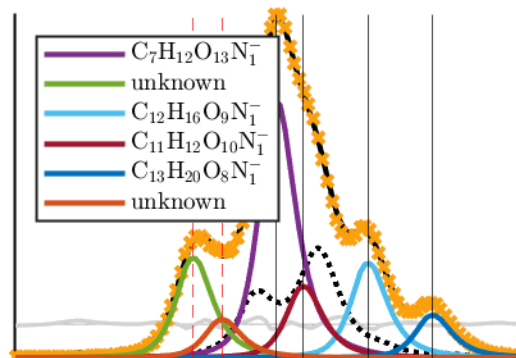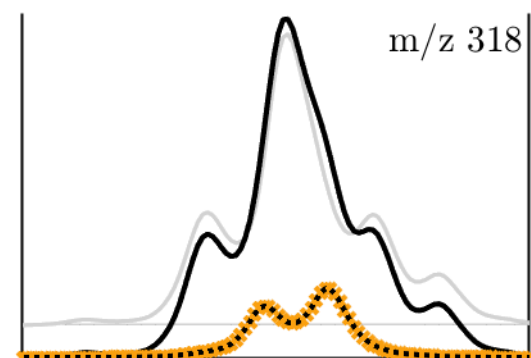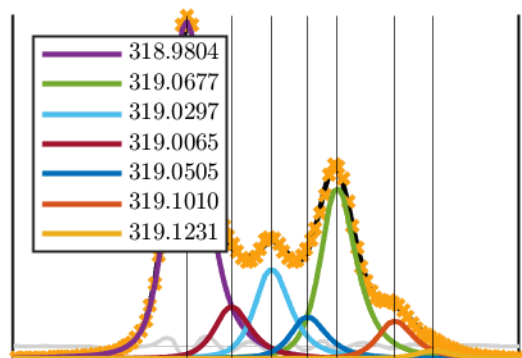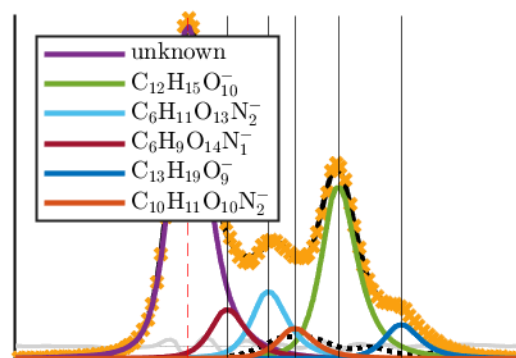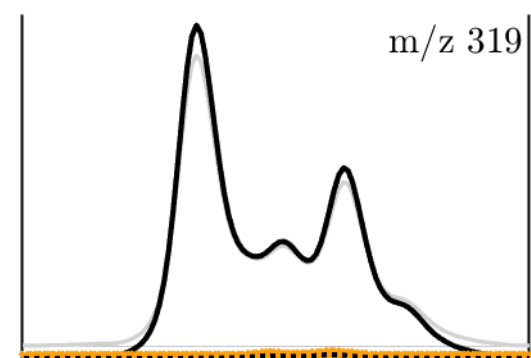



Free fit

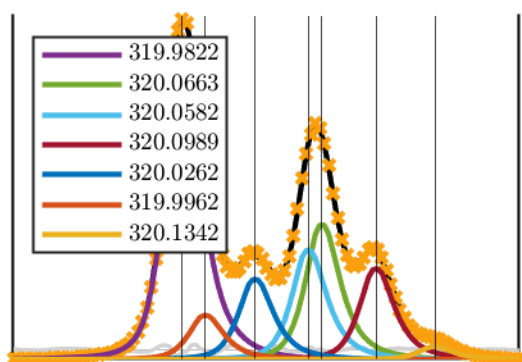

Final fit

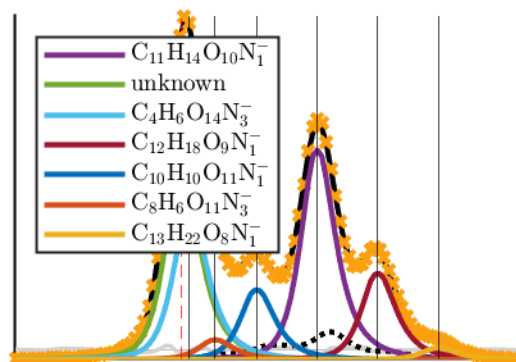

Manual fit

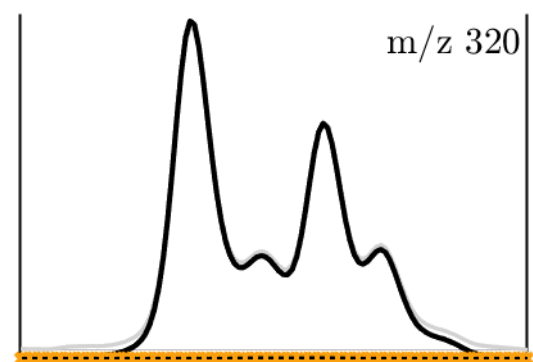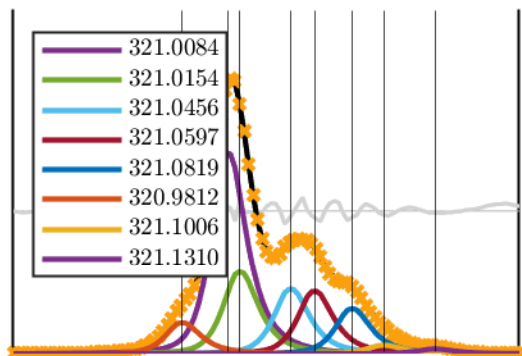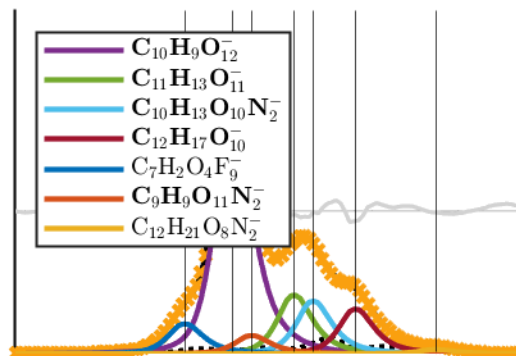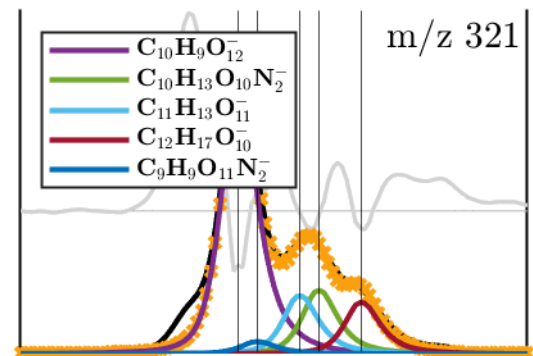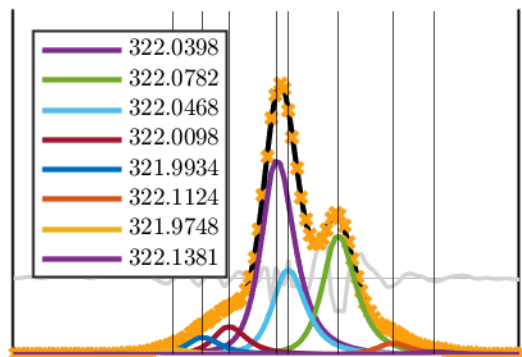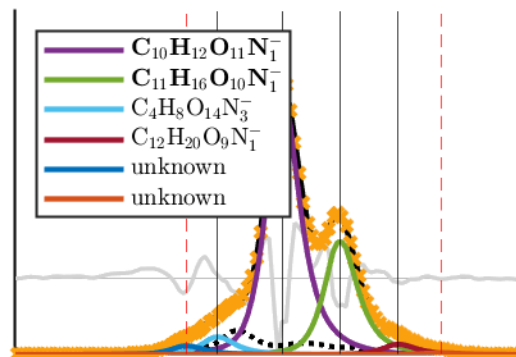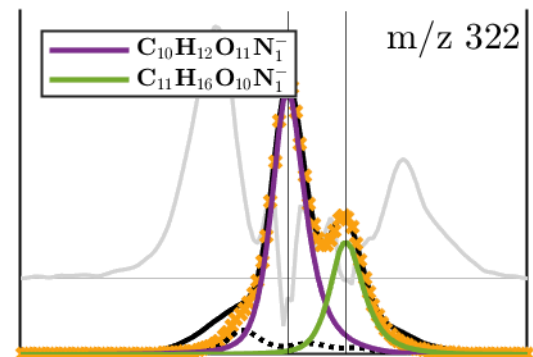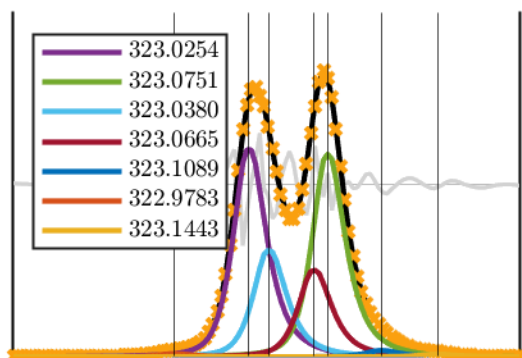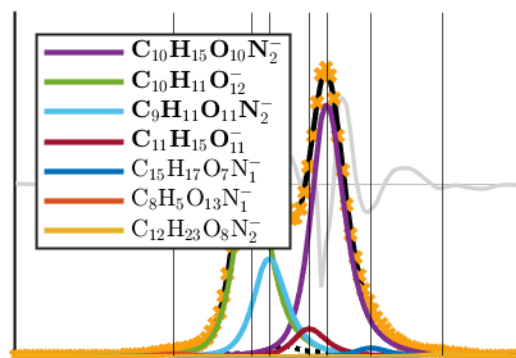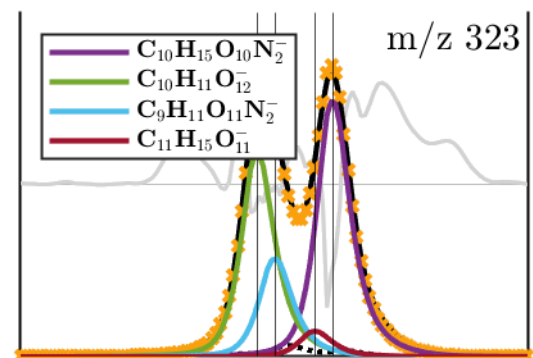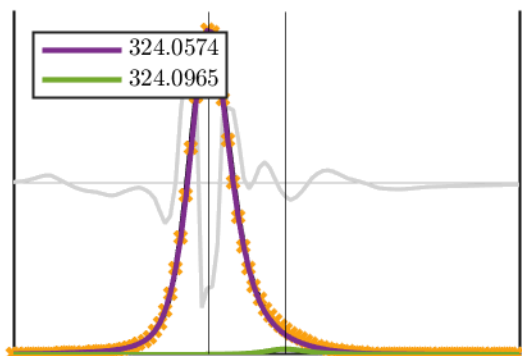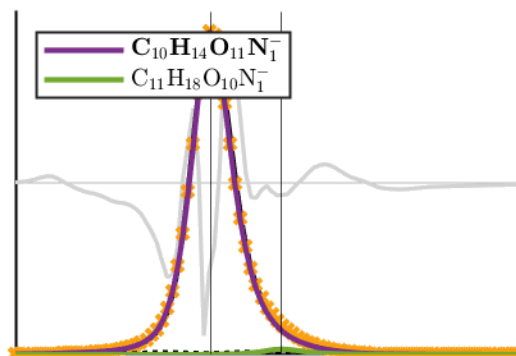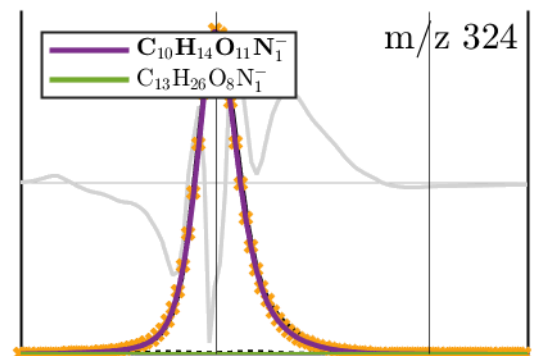

Free fit

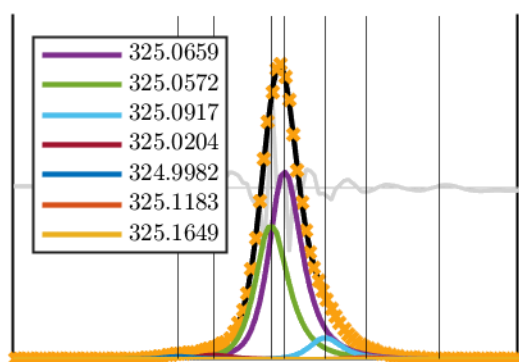

Final fit

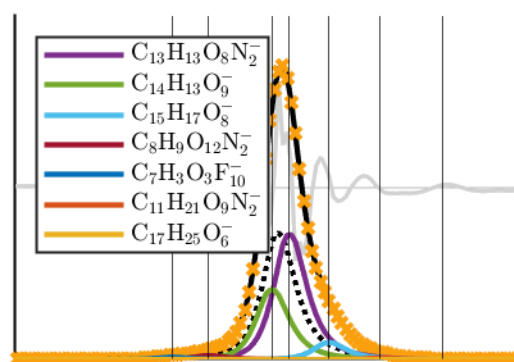

Manual fit

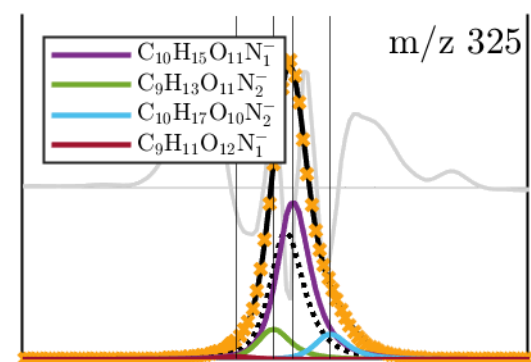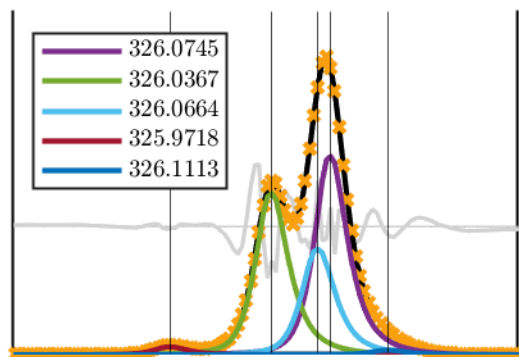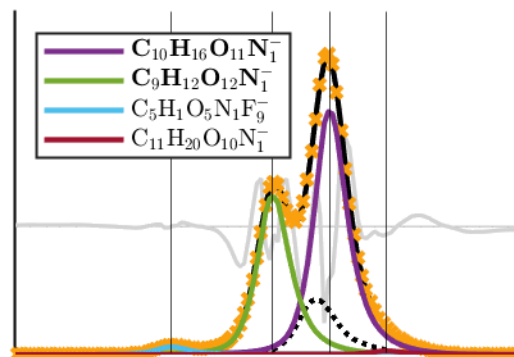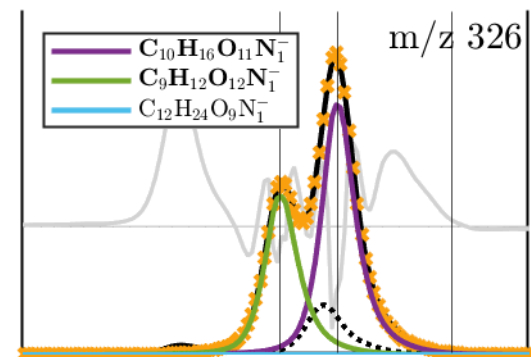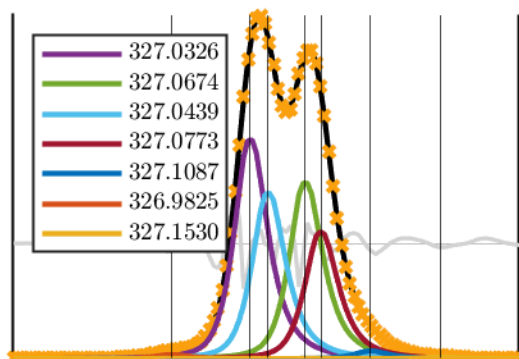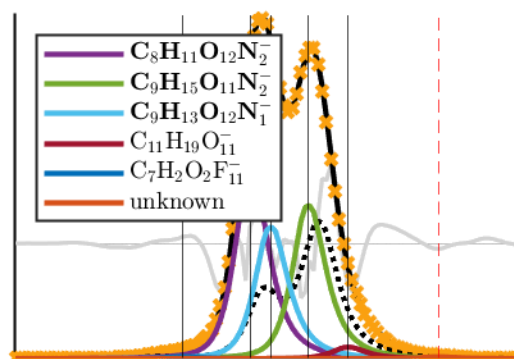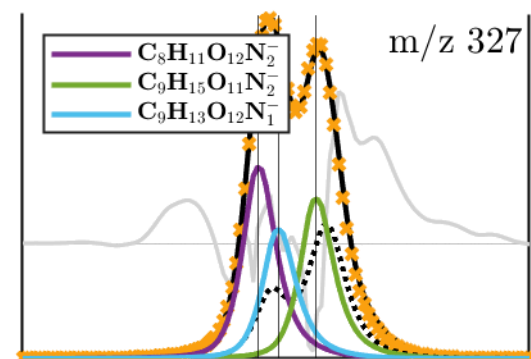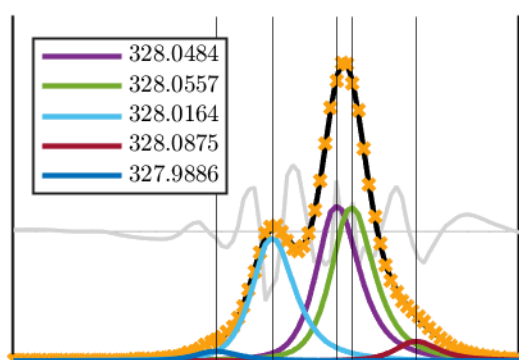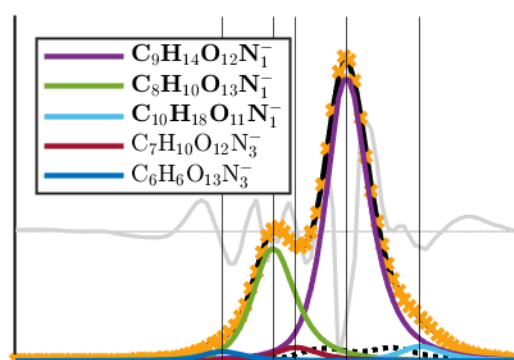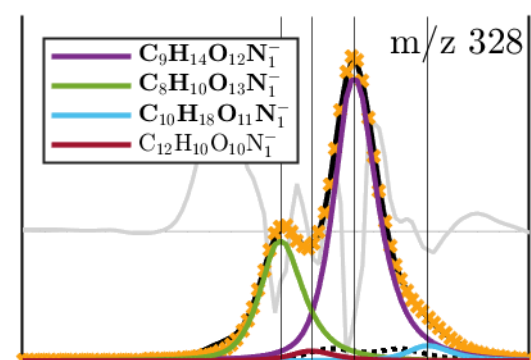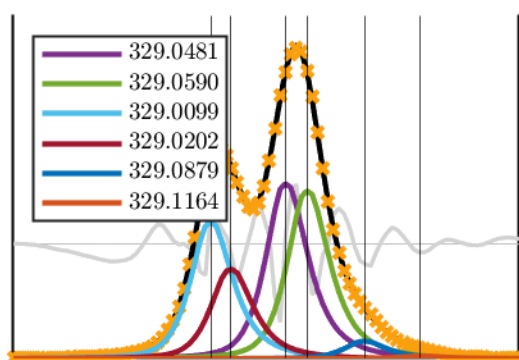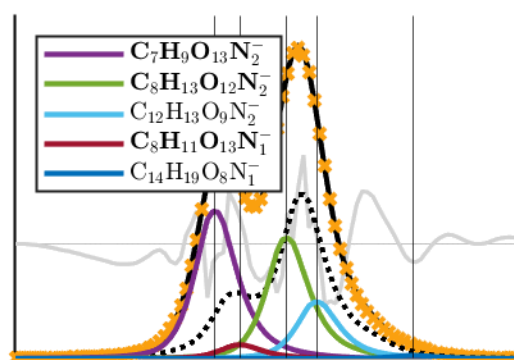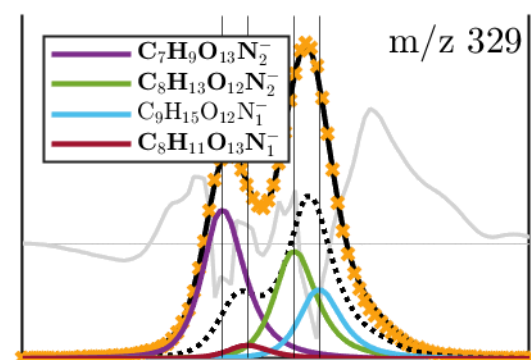

Free fit

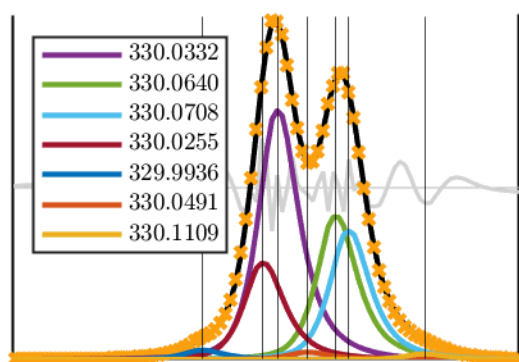

Final fit

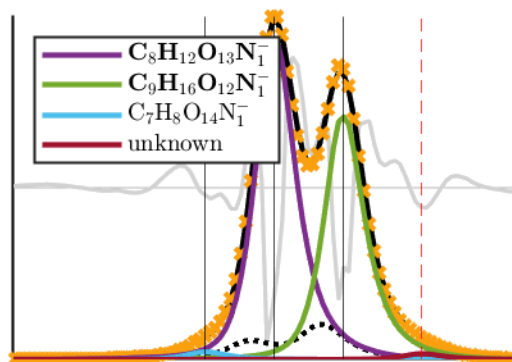

Manual fit

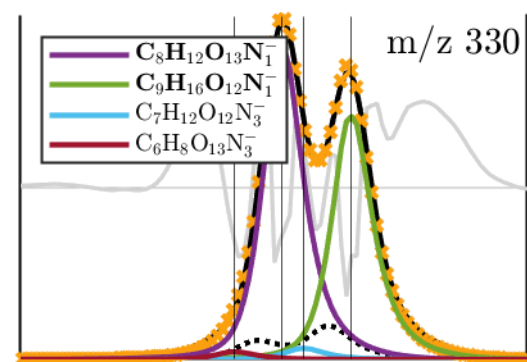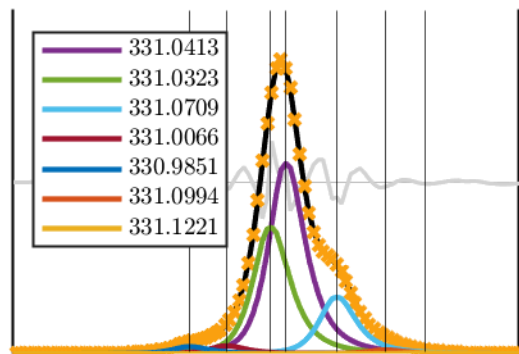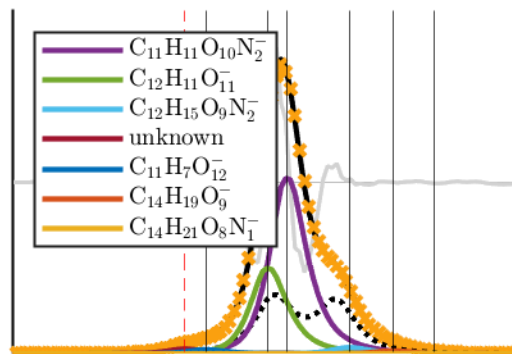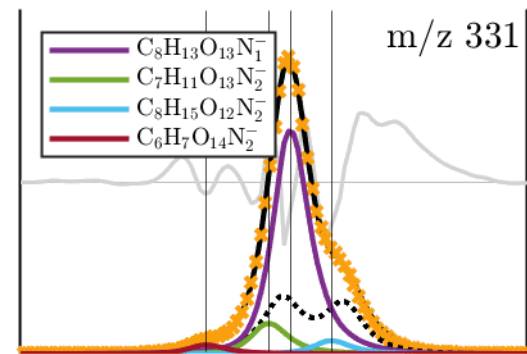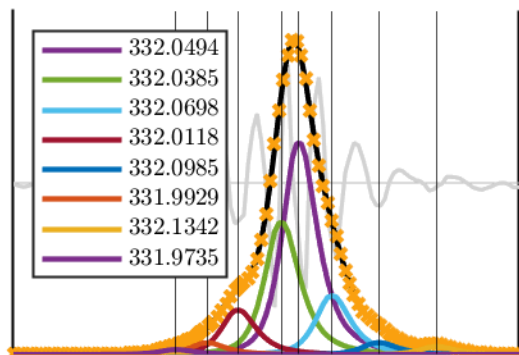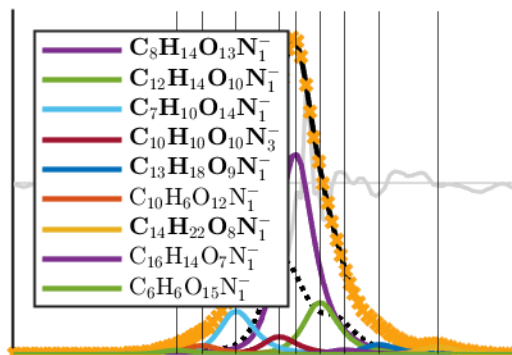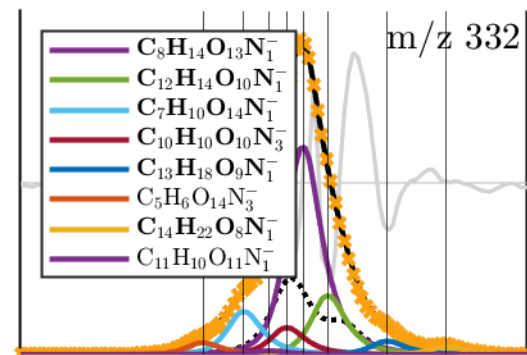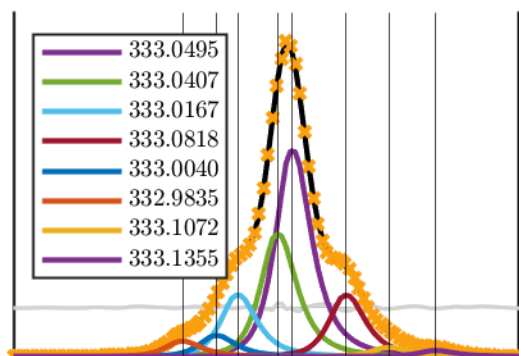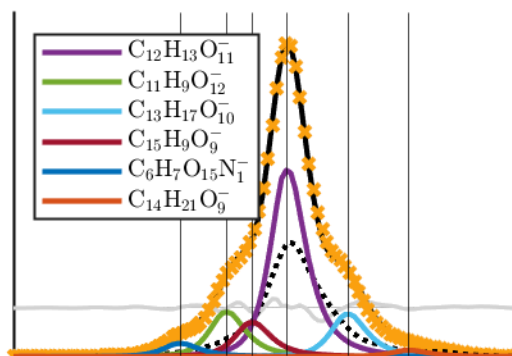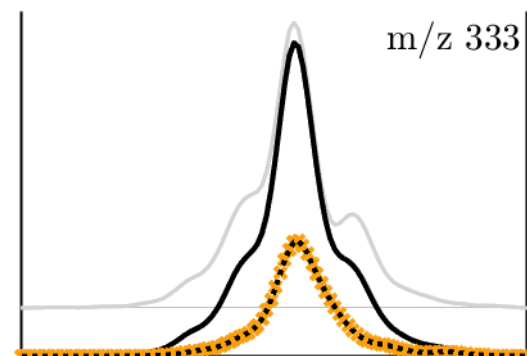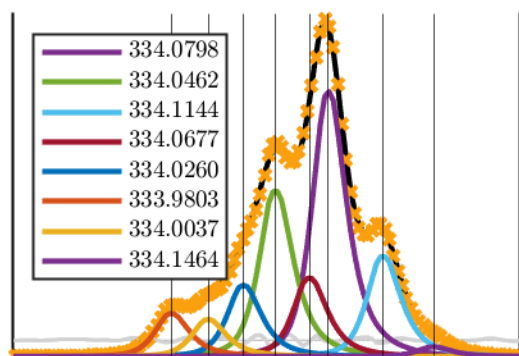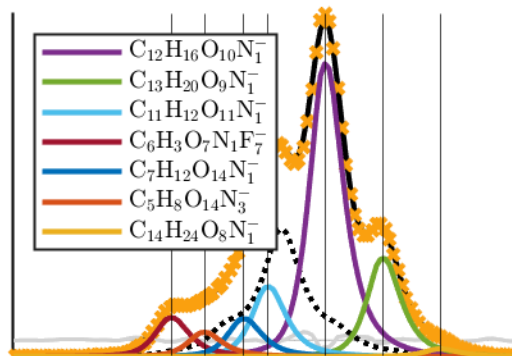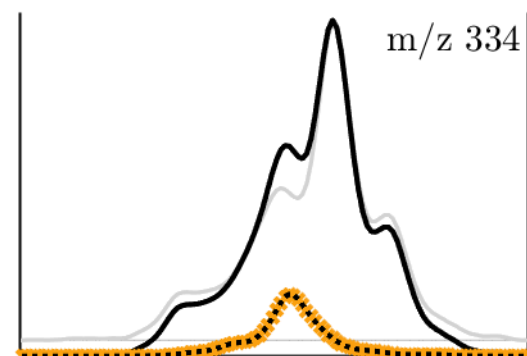



Free fit

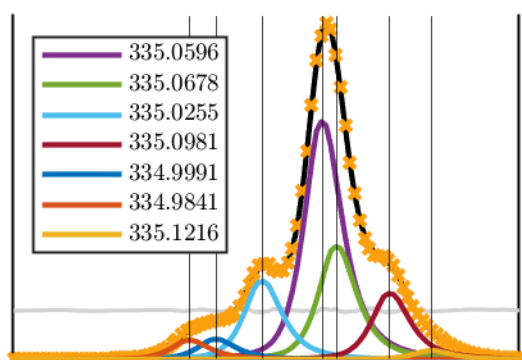

Final fit

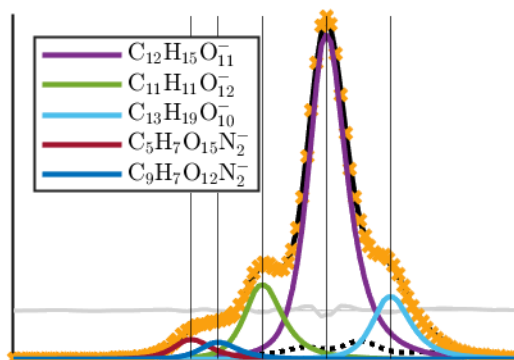

Manual fit

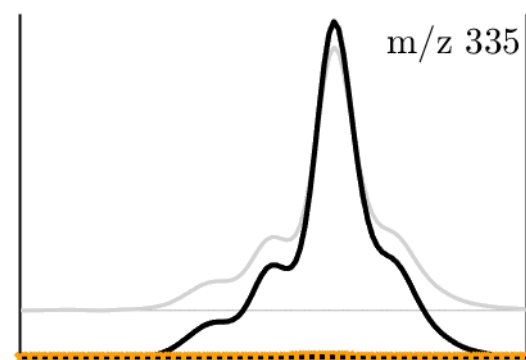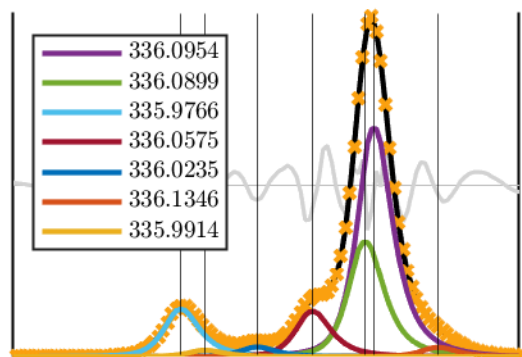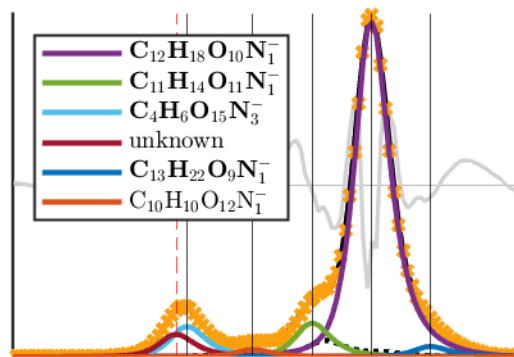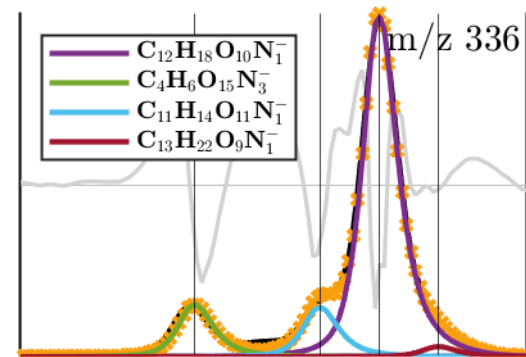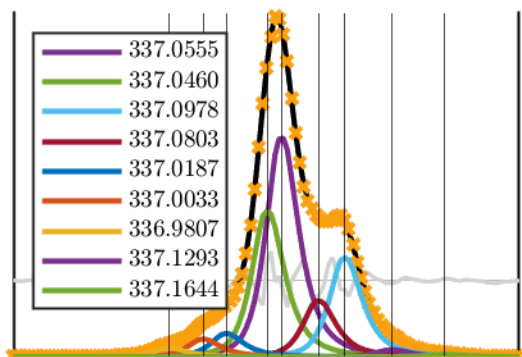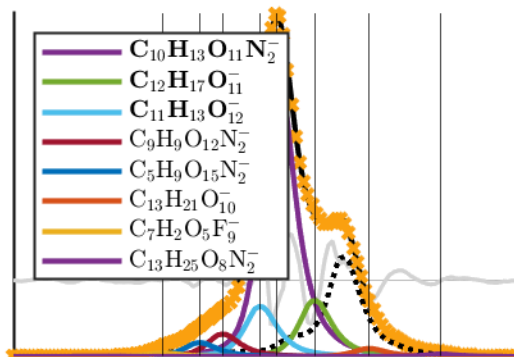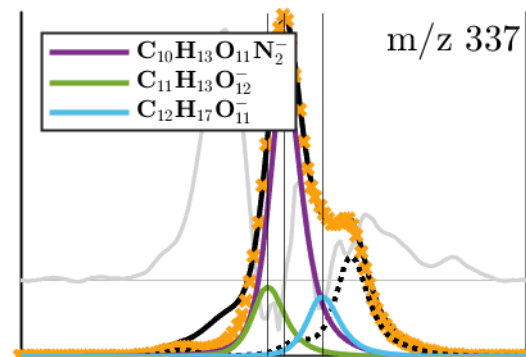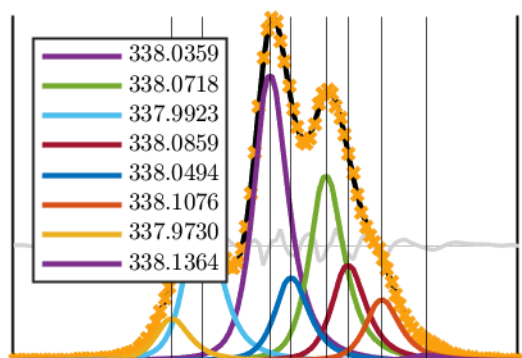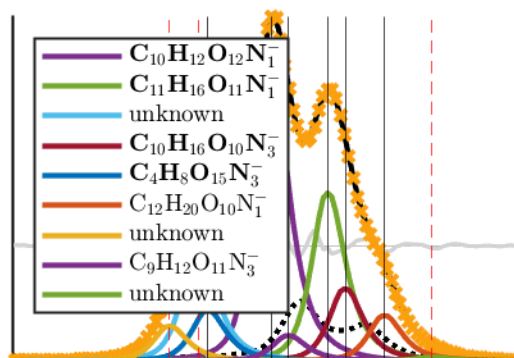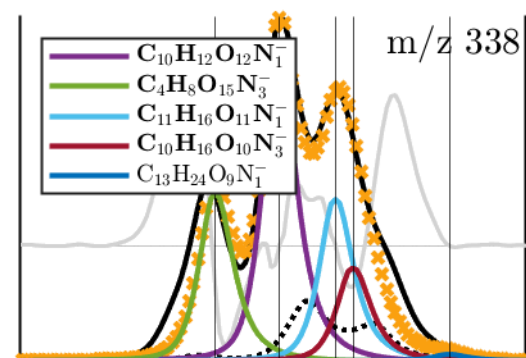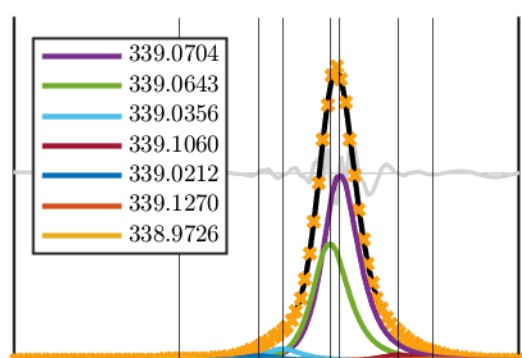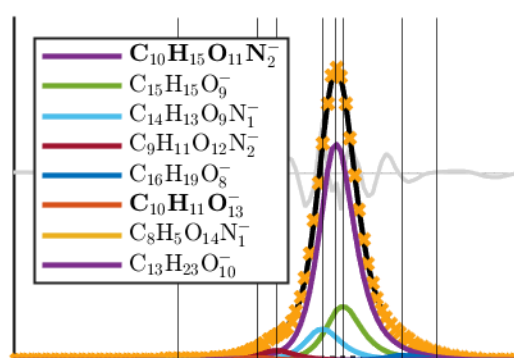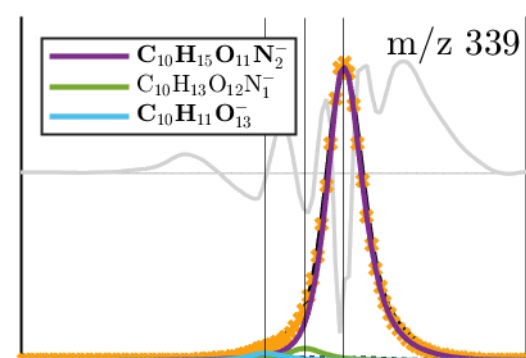



Free fit

Final fit

Manual fit

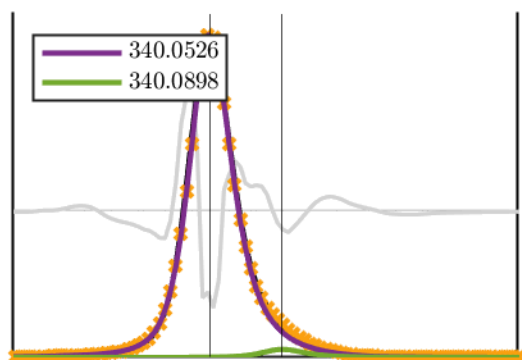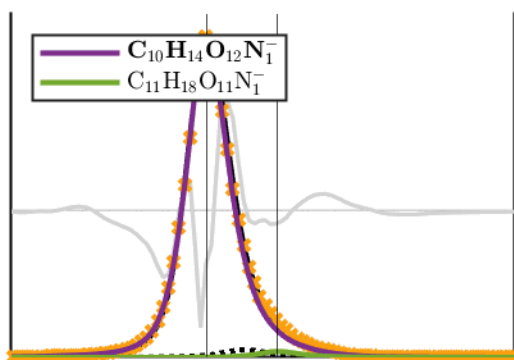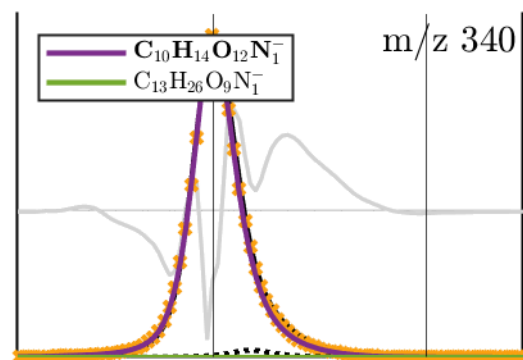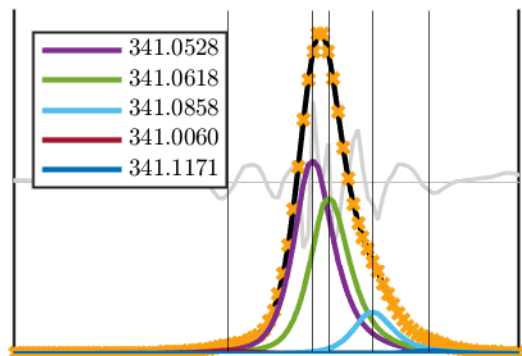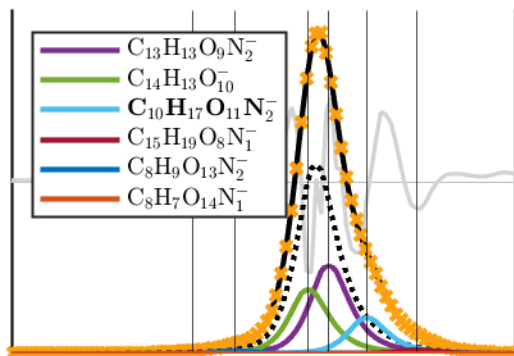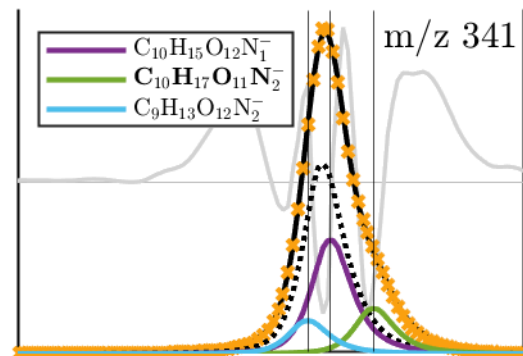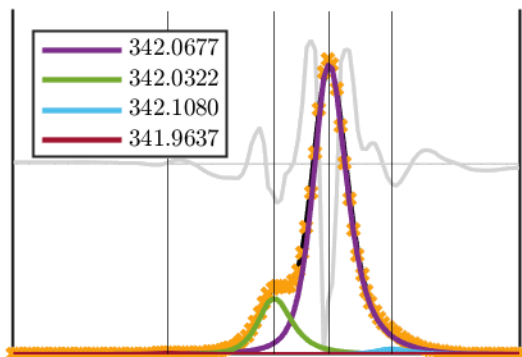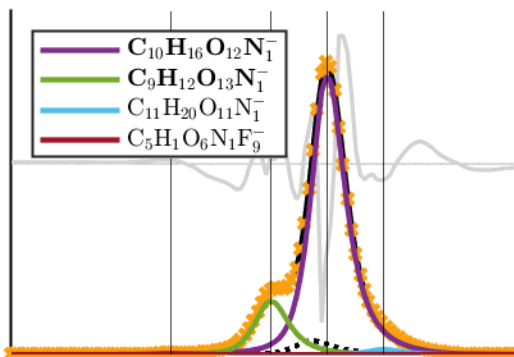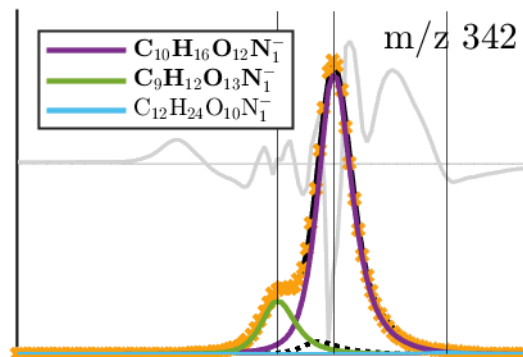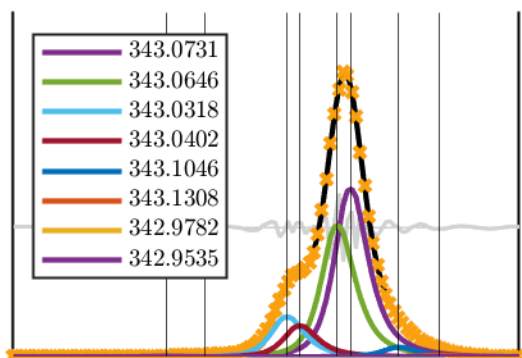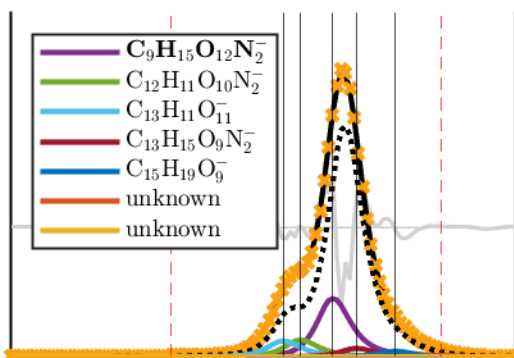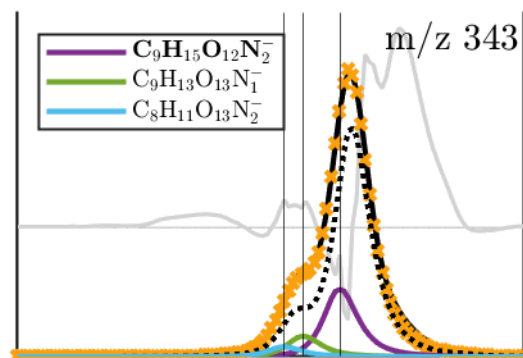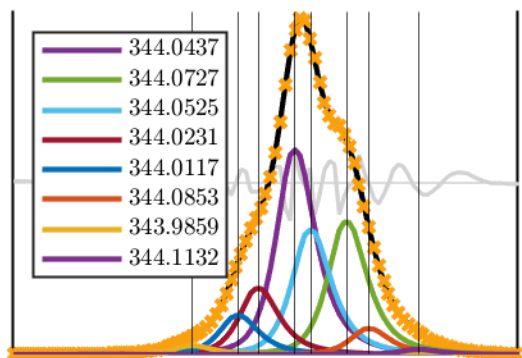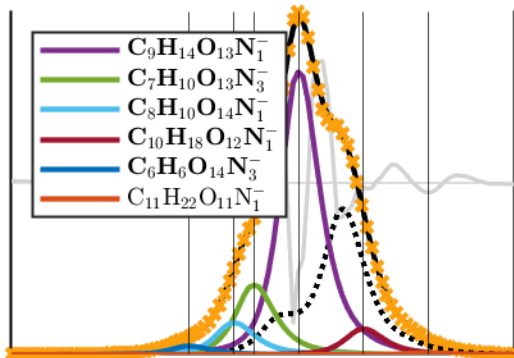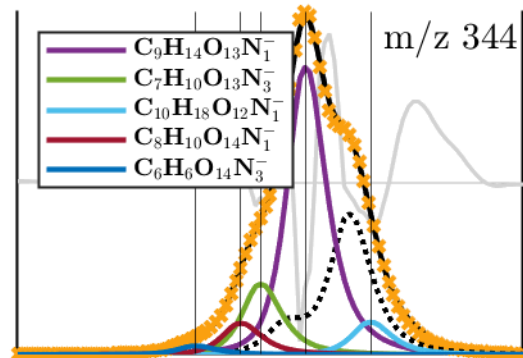

Free fit

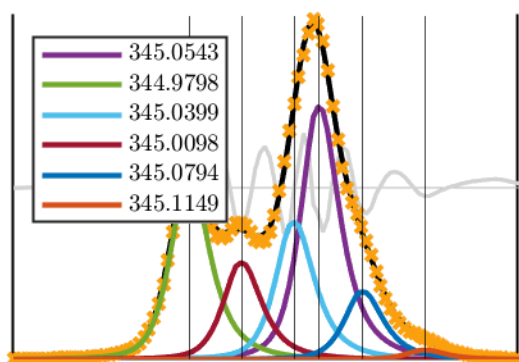

Final fit

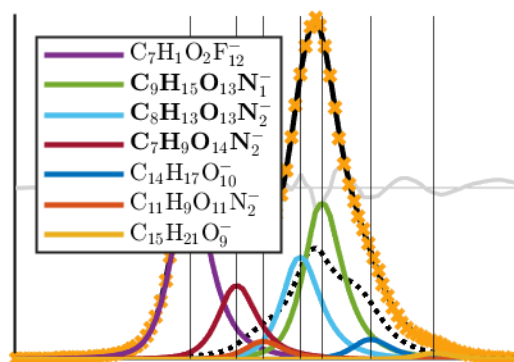

Manual fit

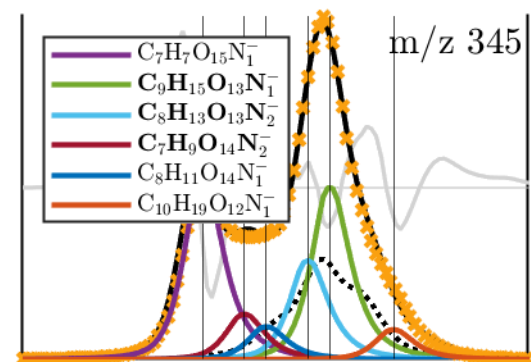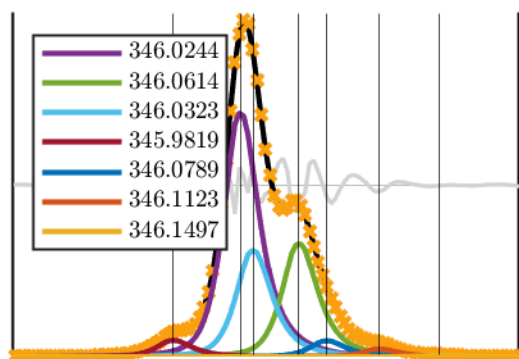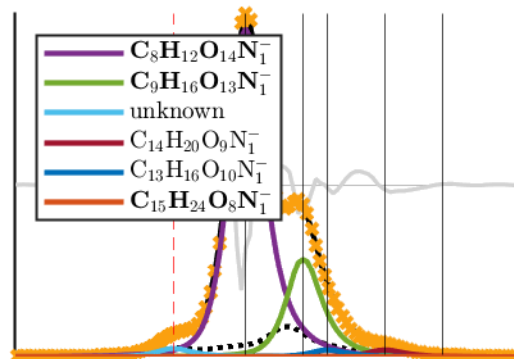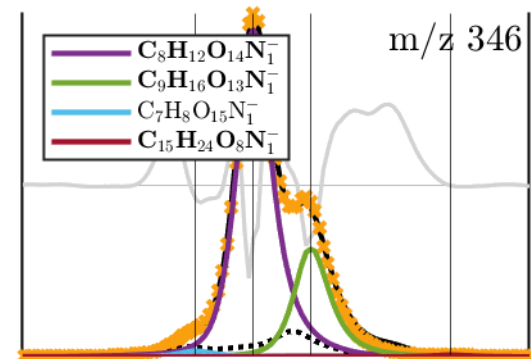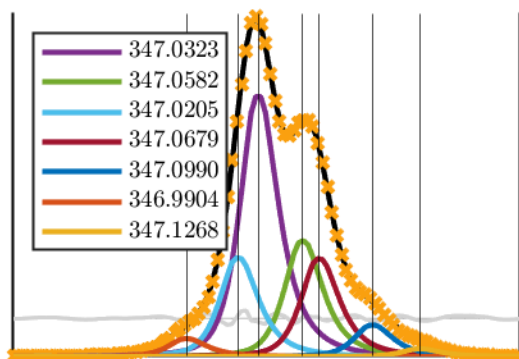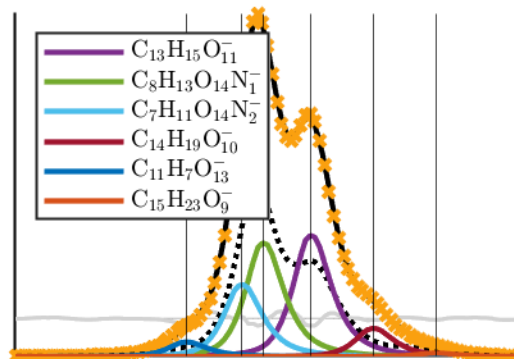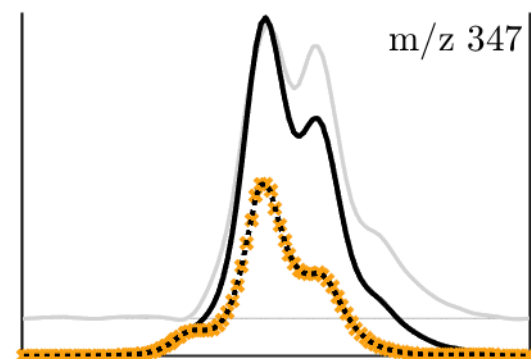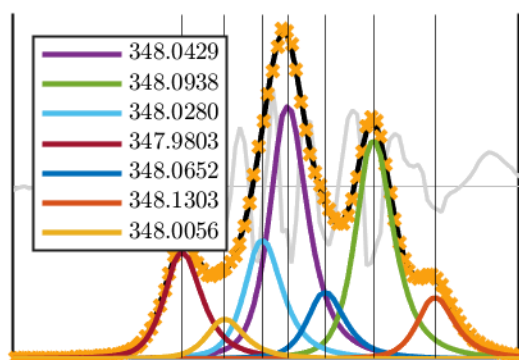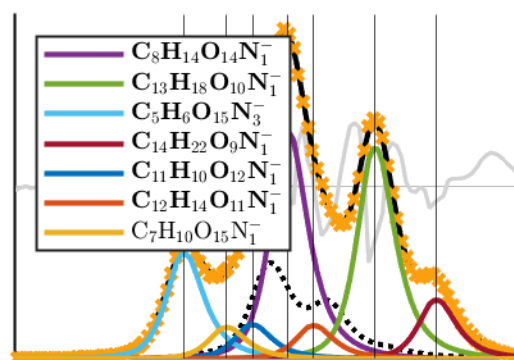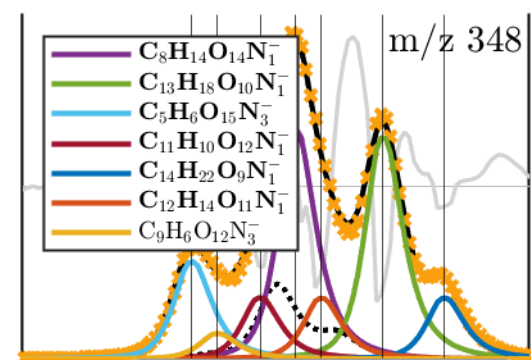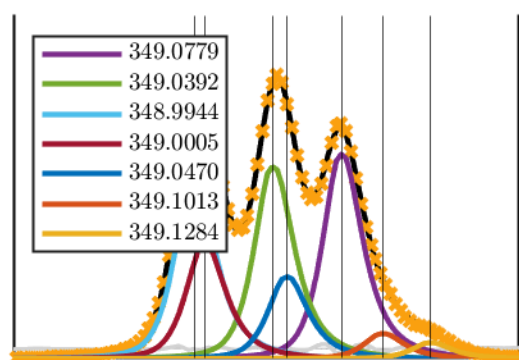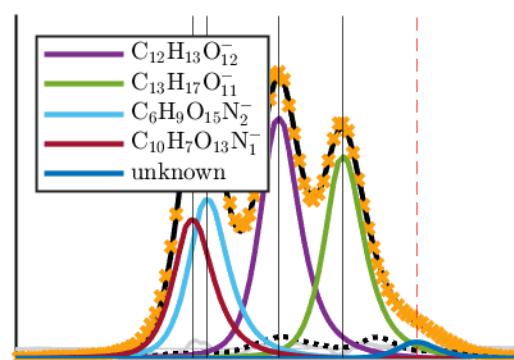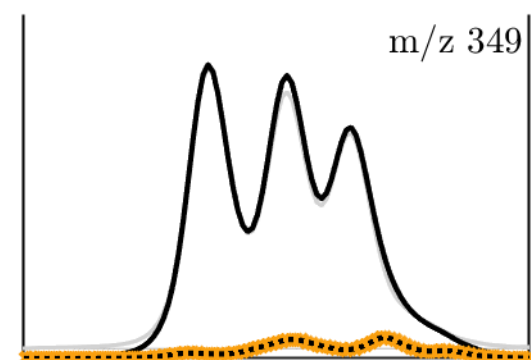

Free fit

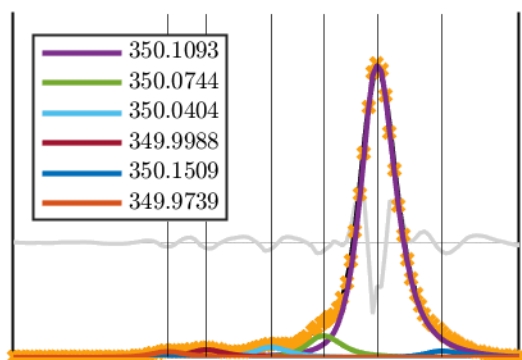

Final fit

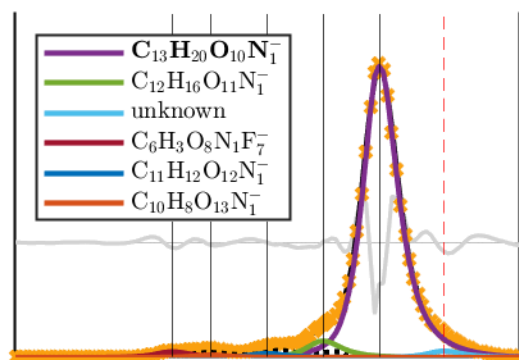

Manual fit

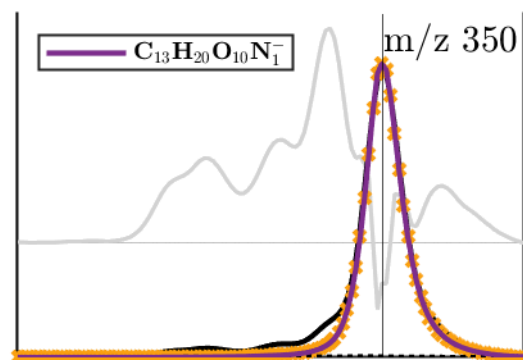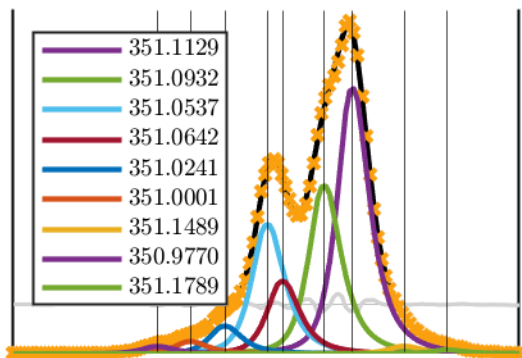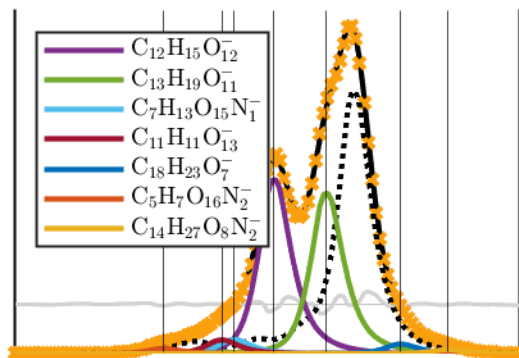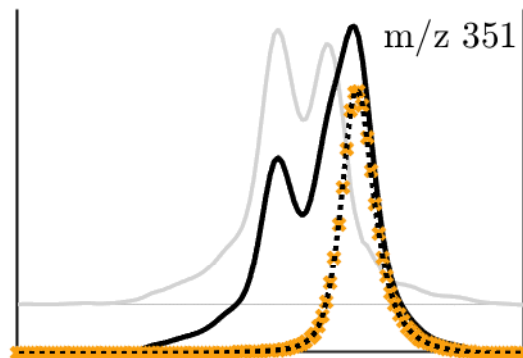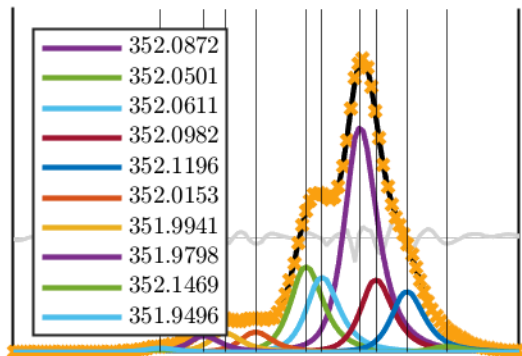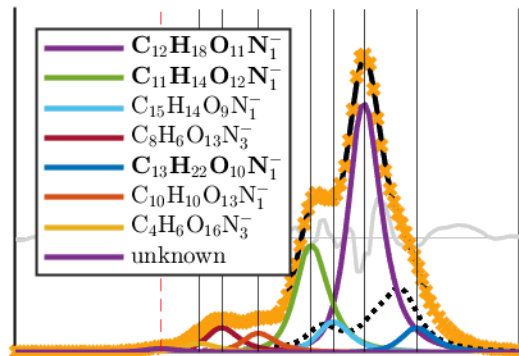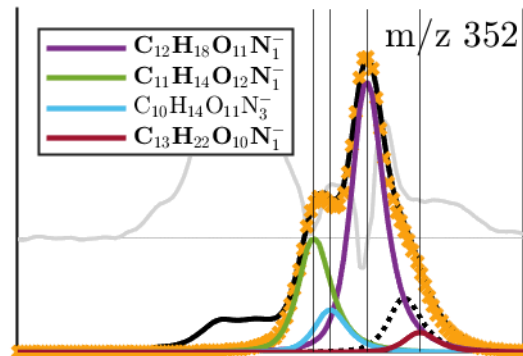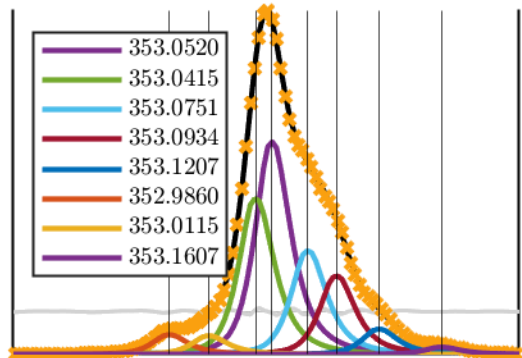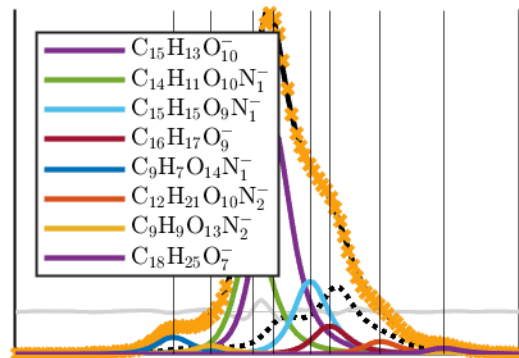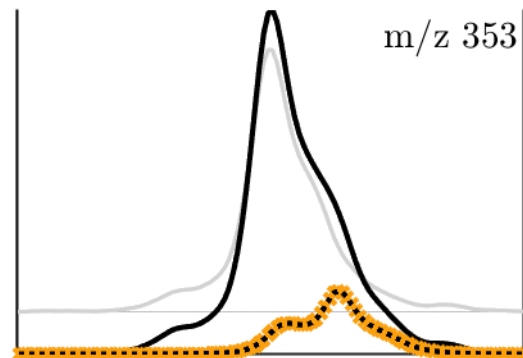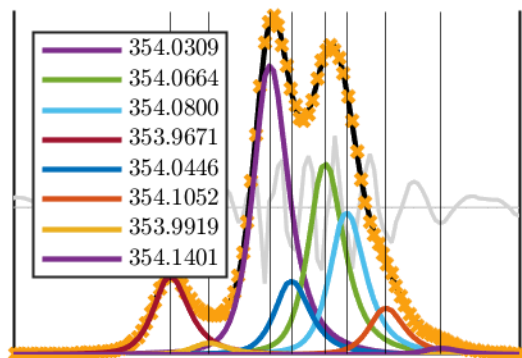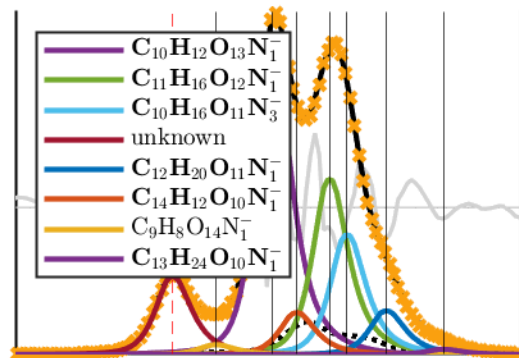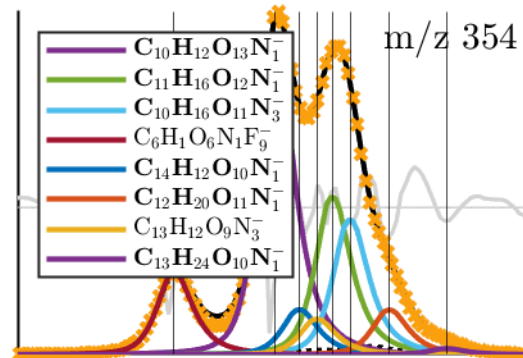



Free fit

Final fit

Manual fit

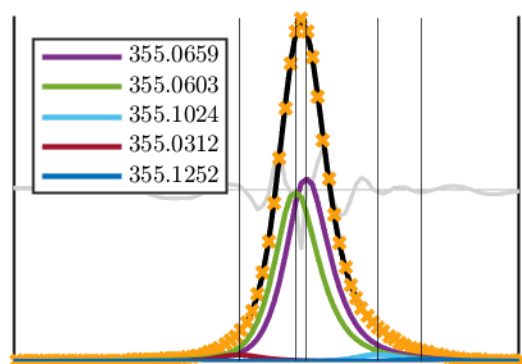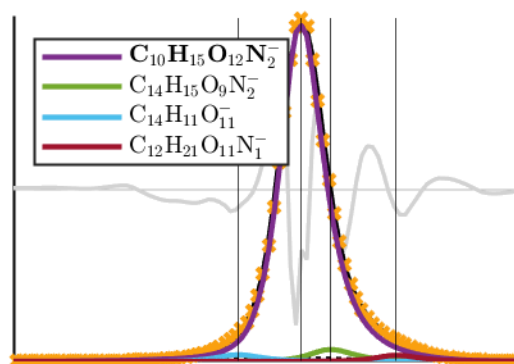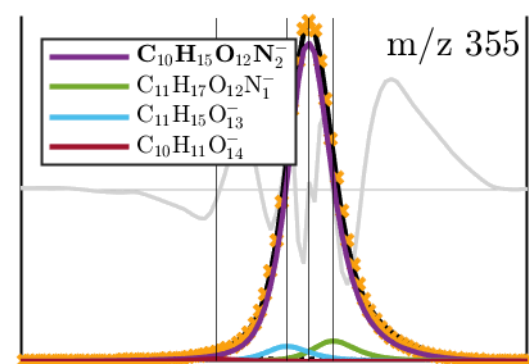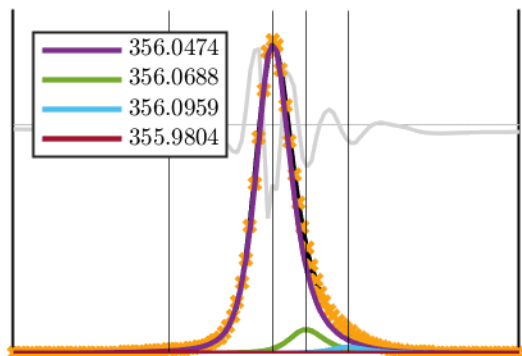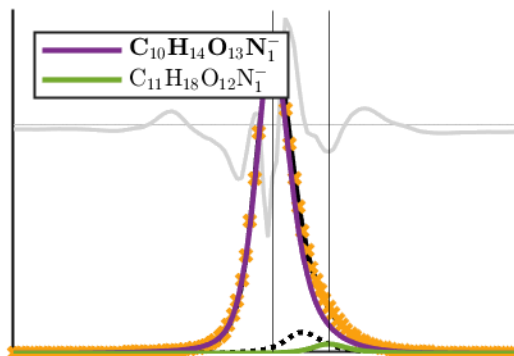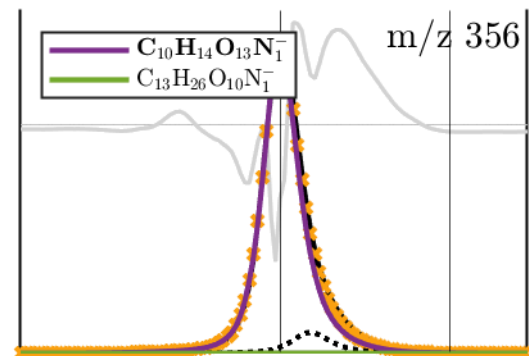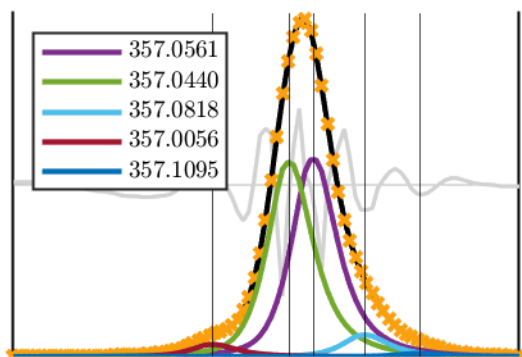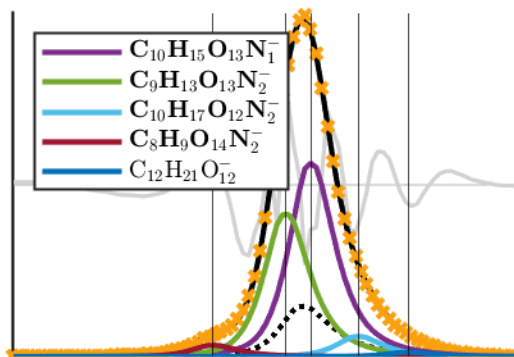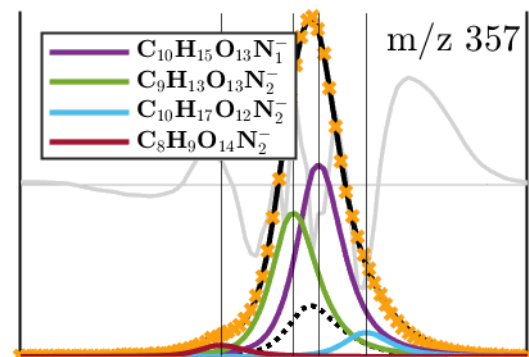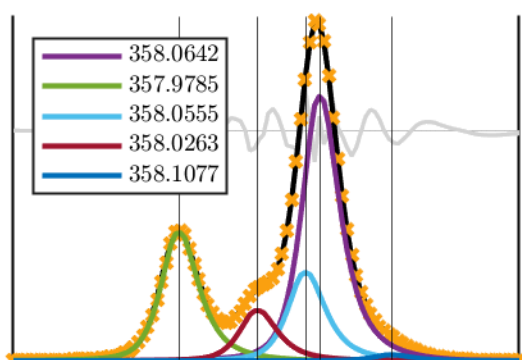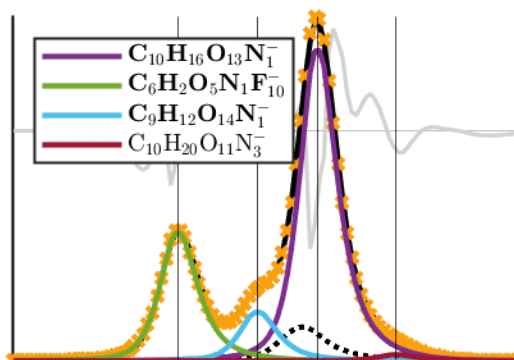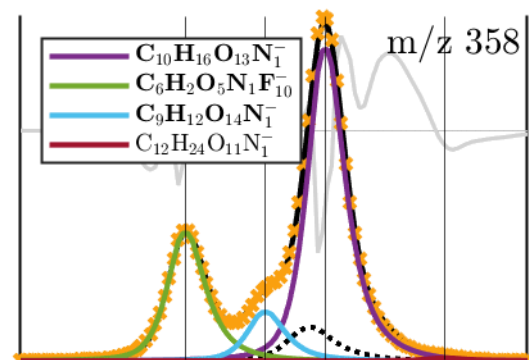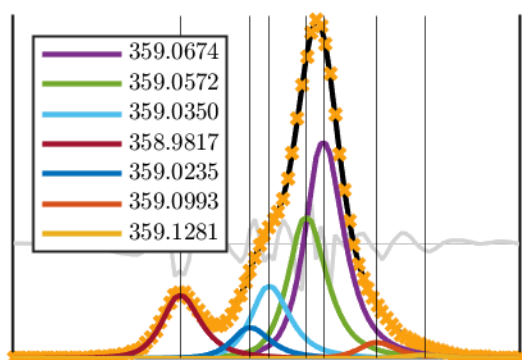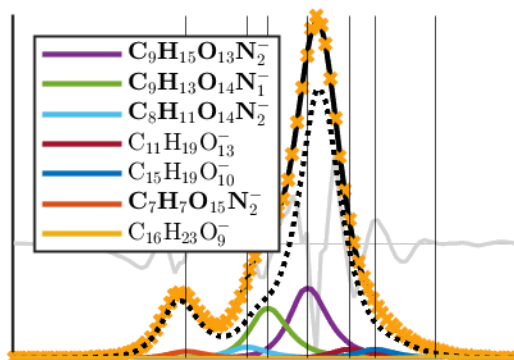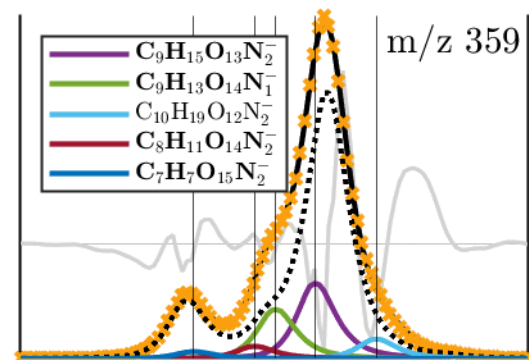



Free fit

Final fit

Manual fit

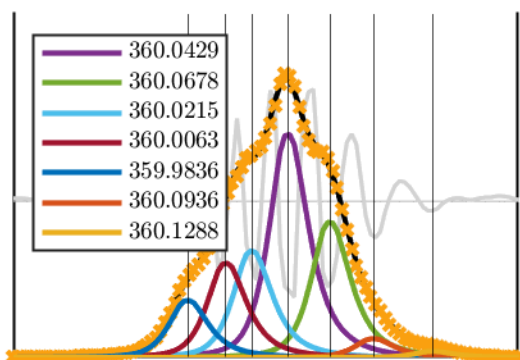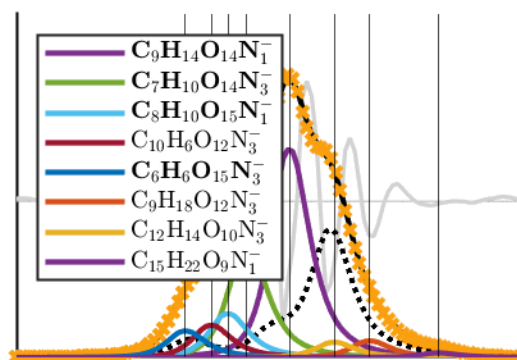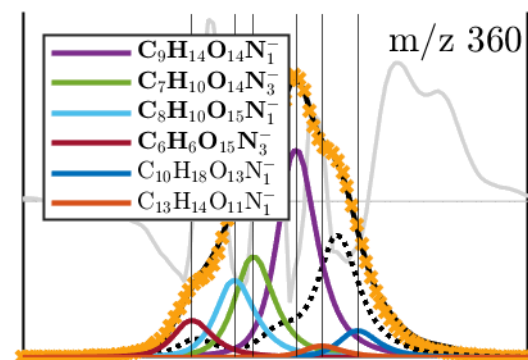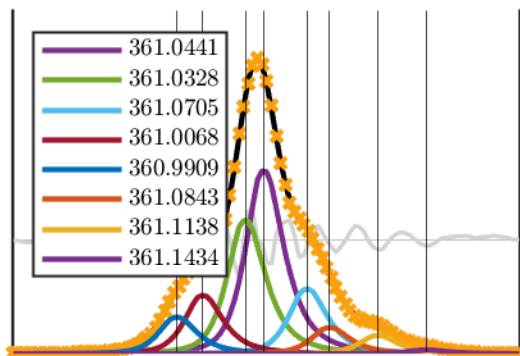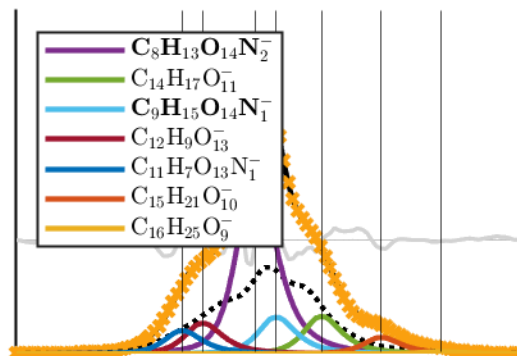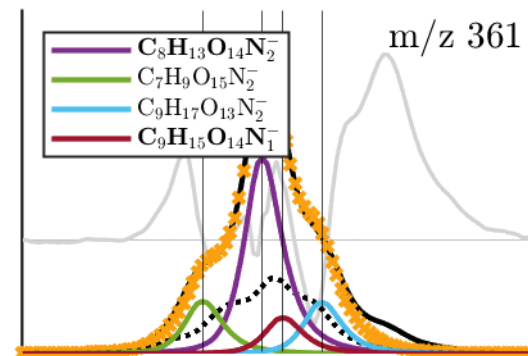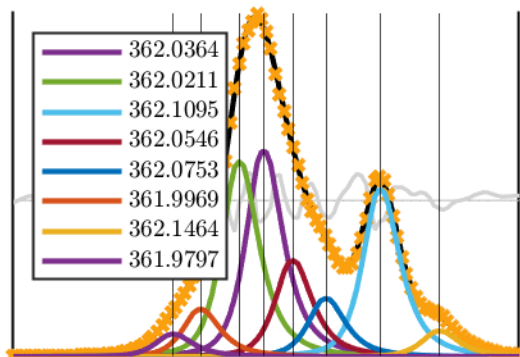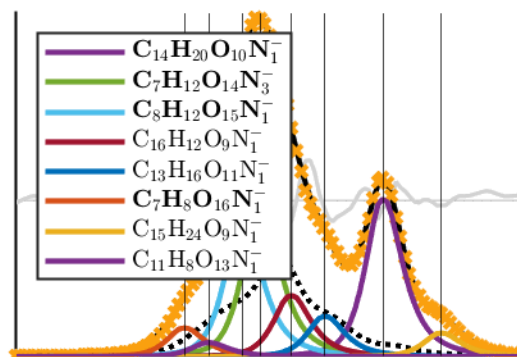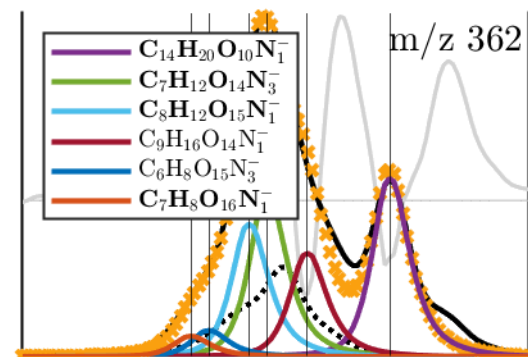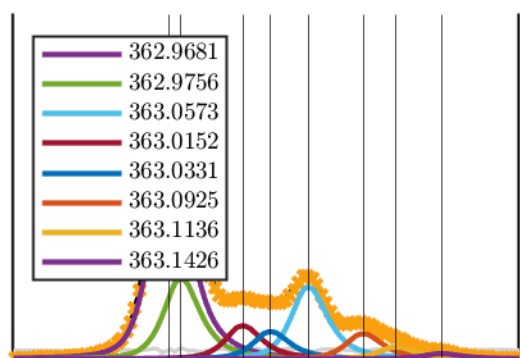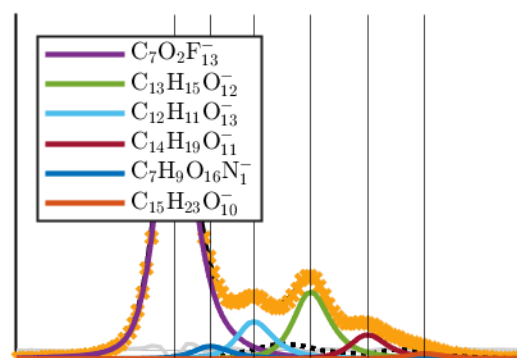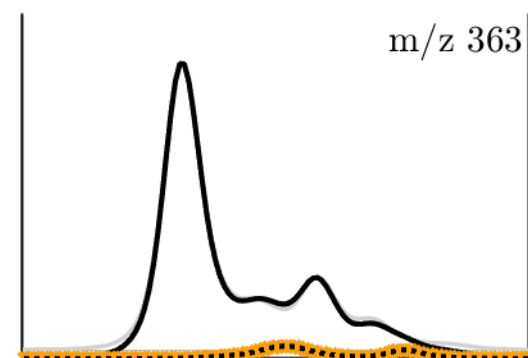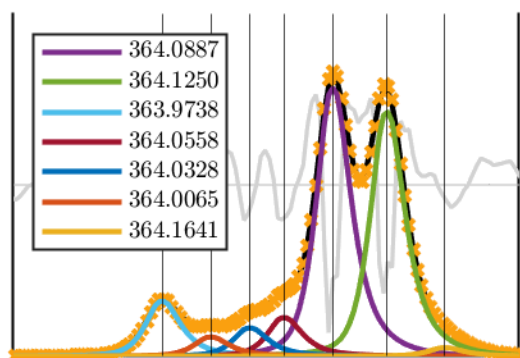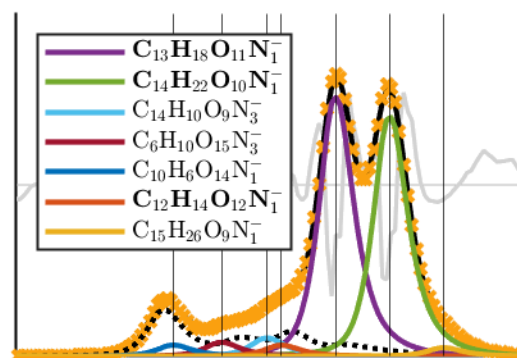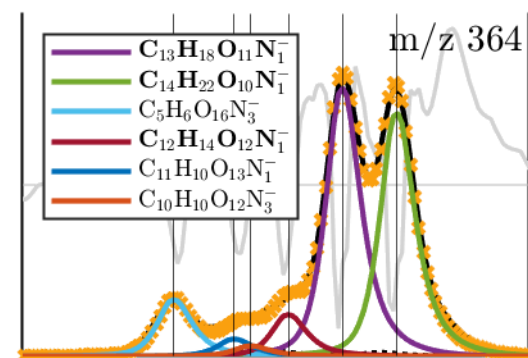

Free fit

Final fit

Manual fit

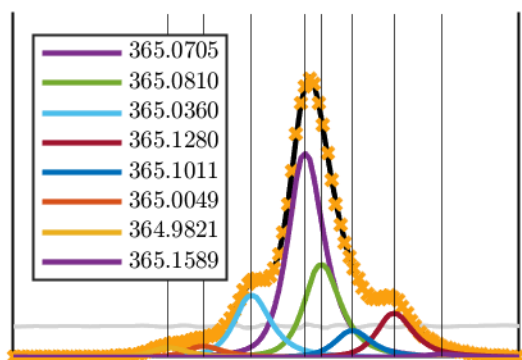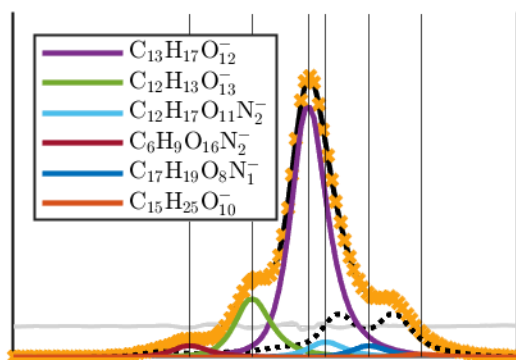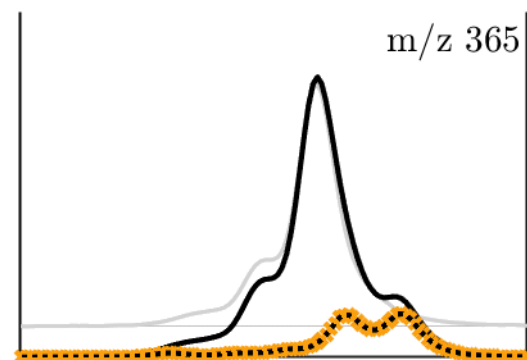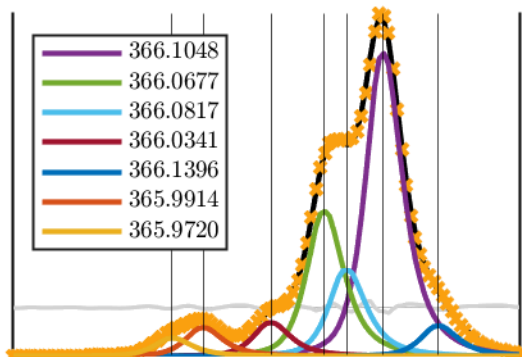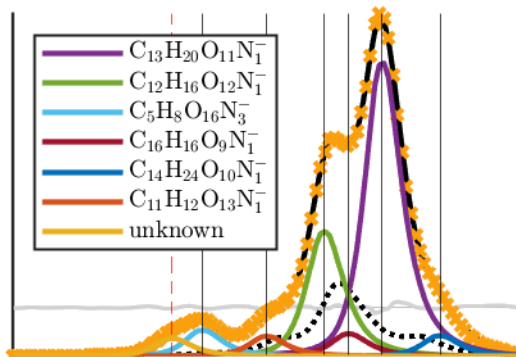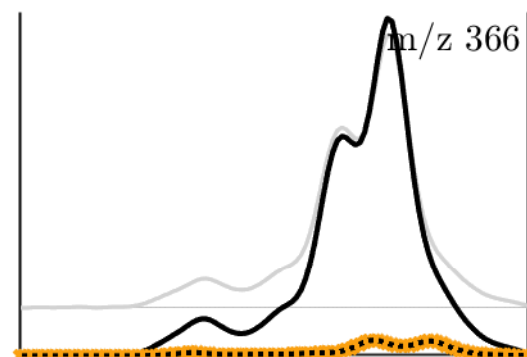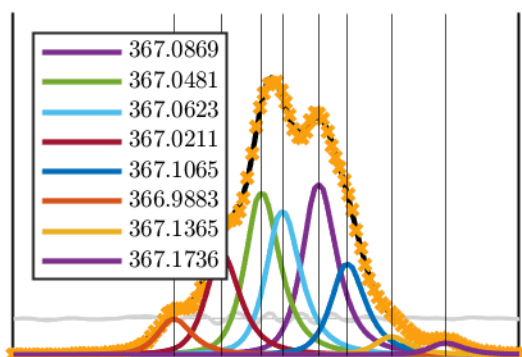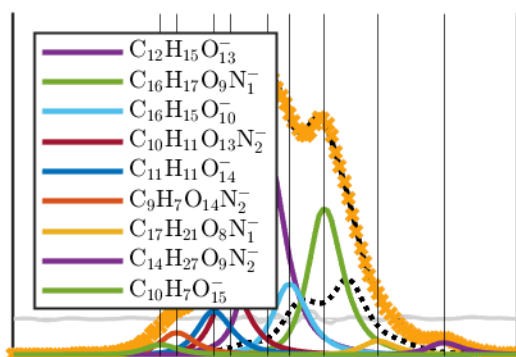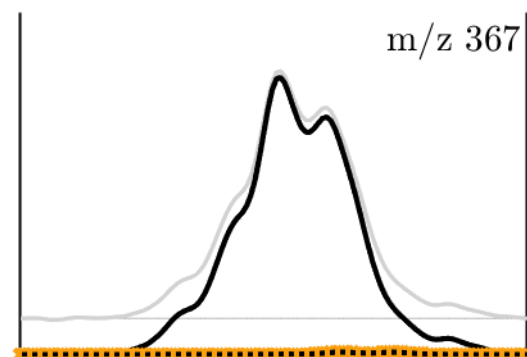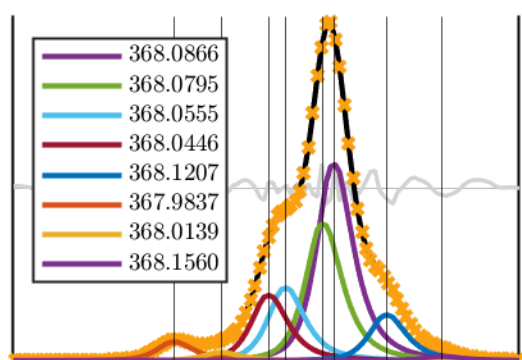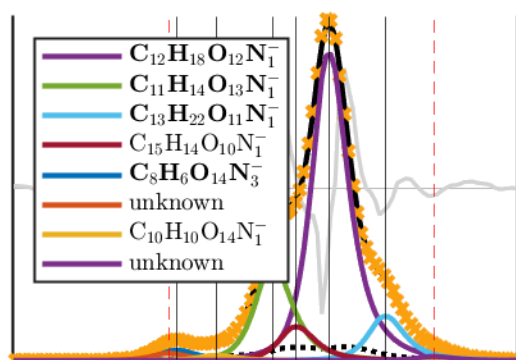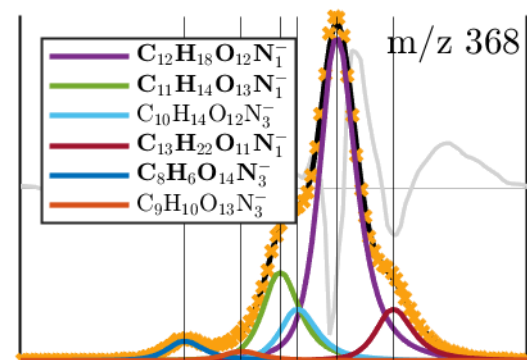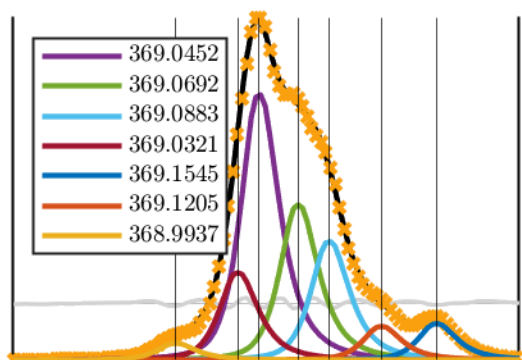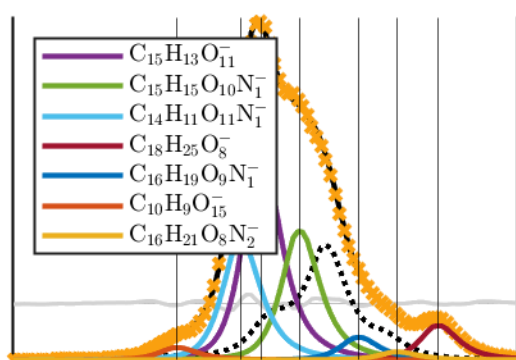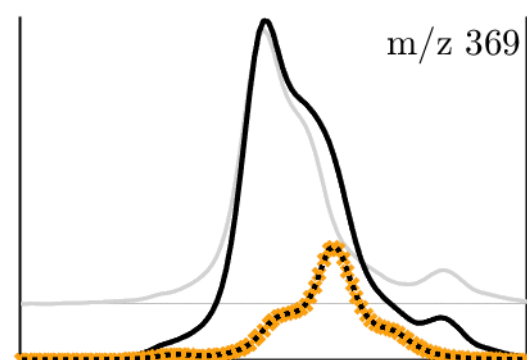

Free fit

Final fit

Manual fit

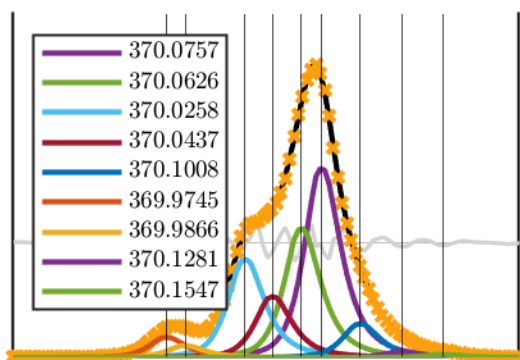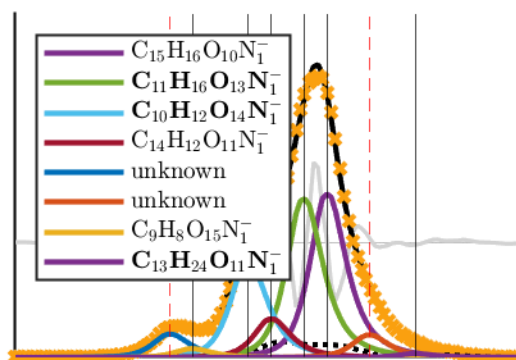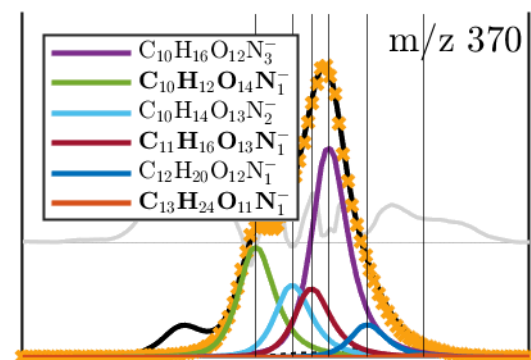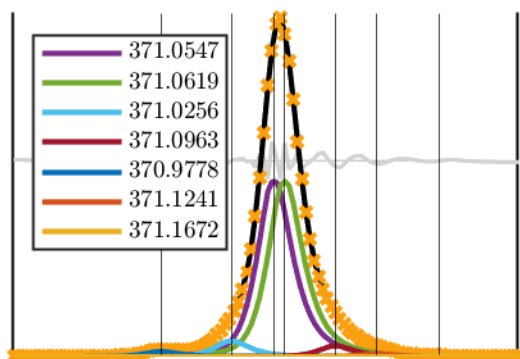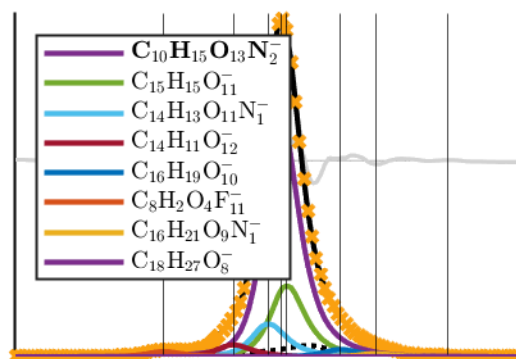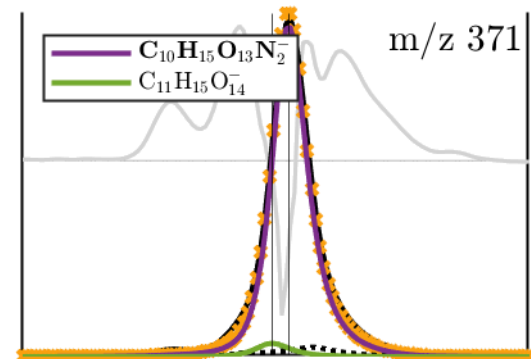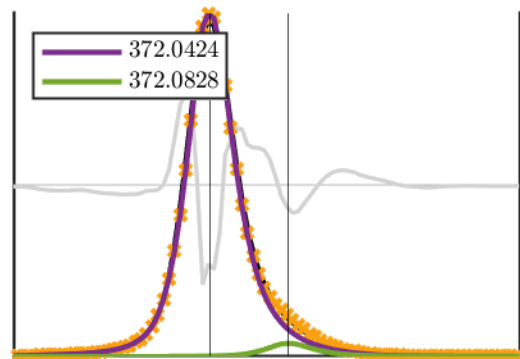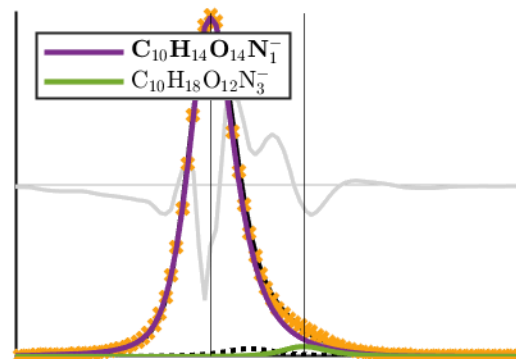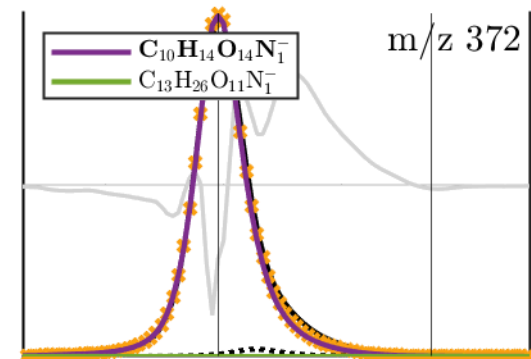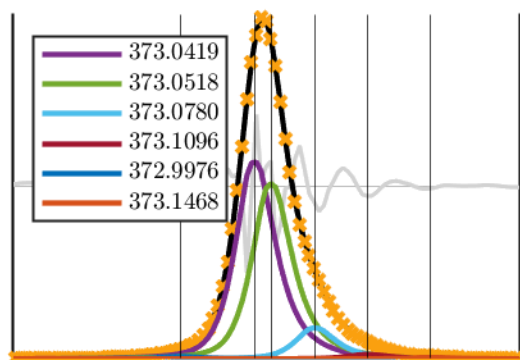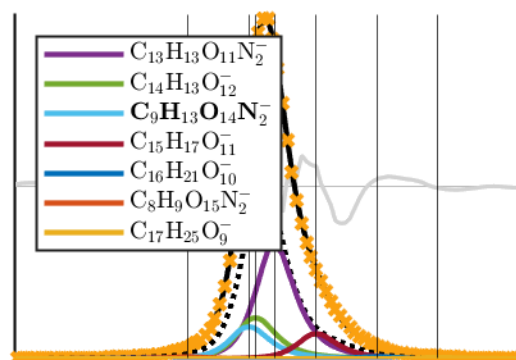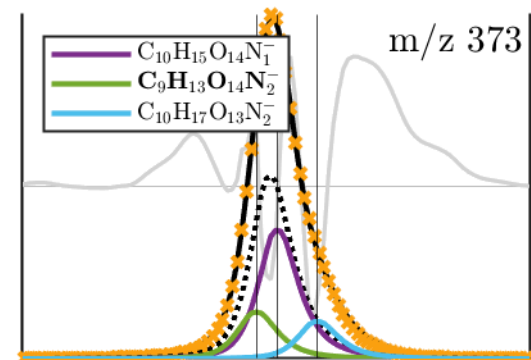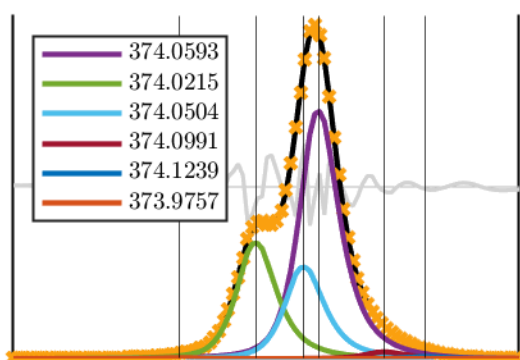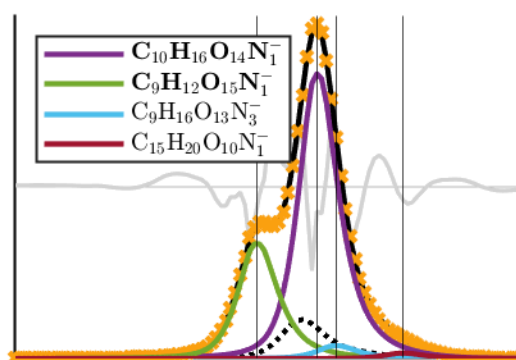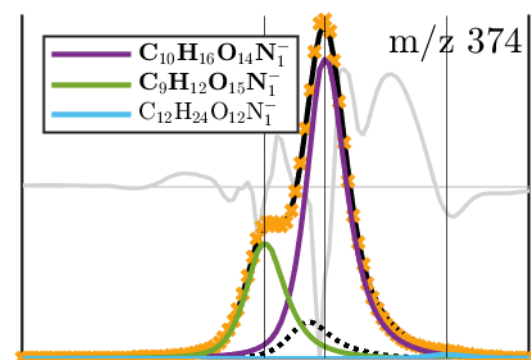



Free fit

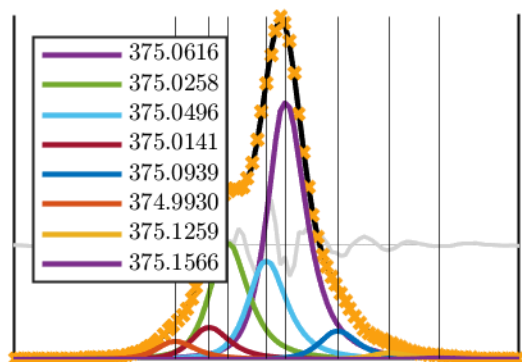

Final fit

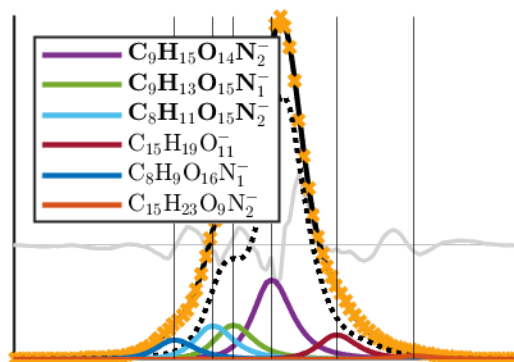

Manual fit

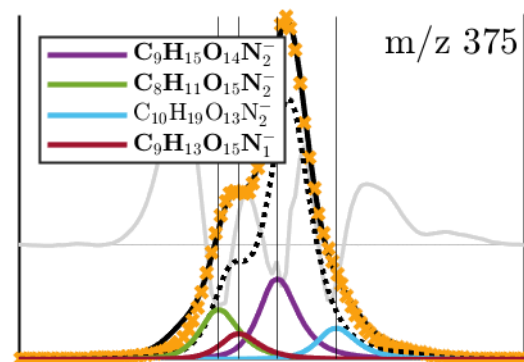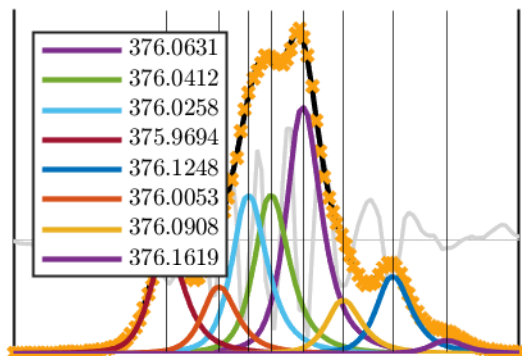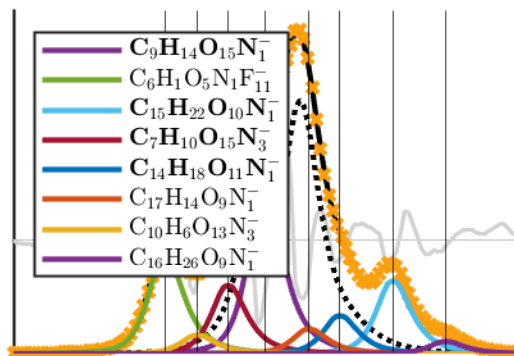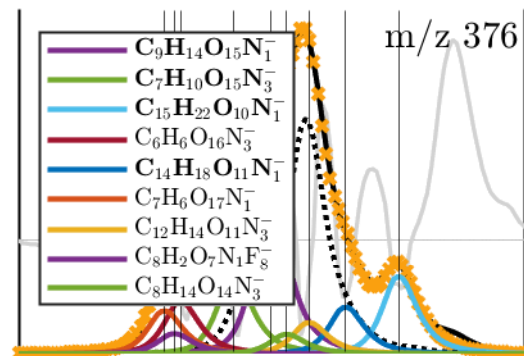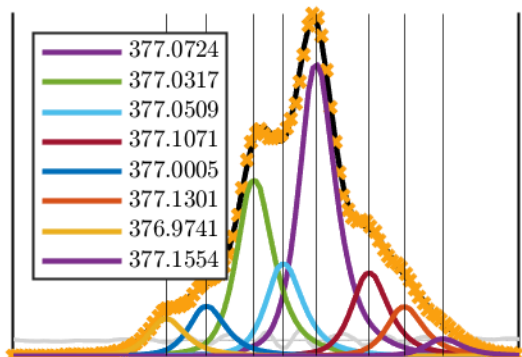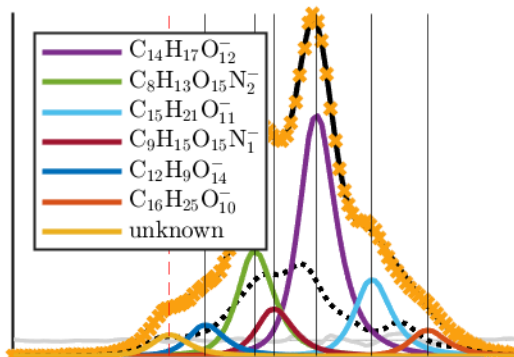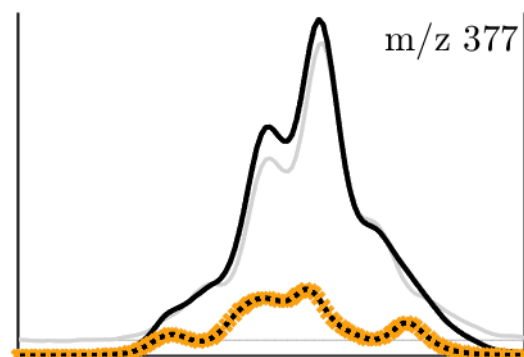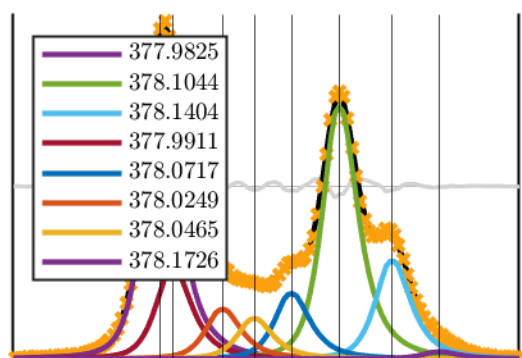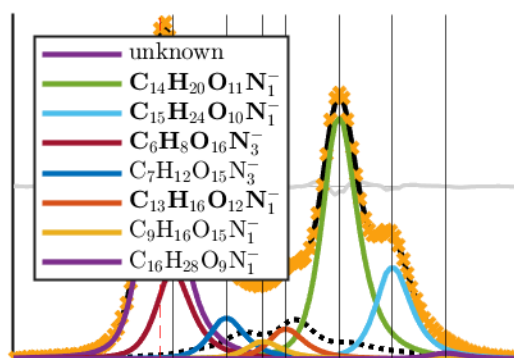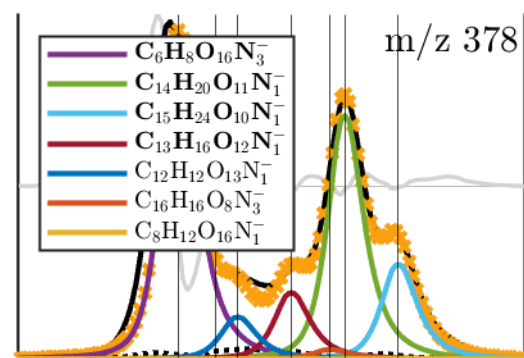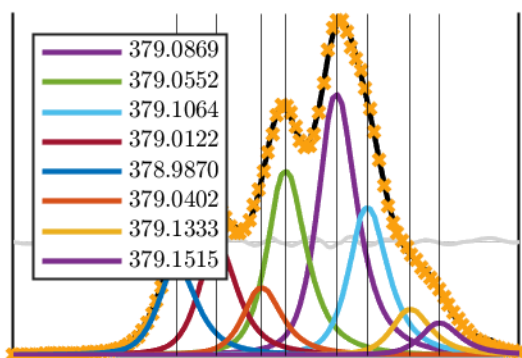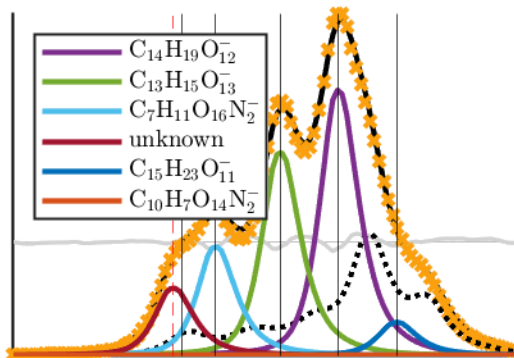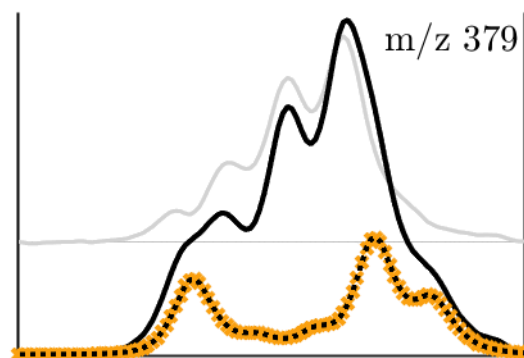



Free fit

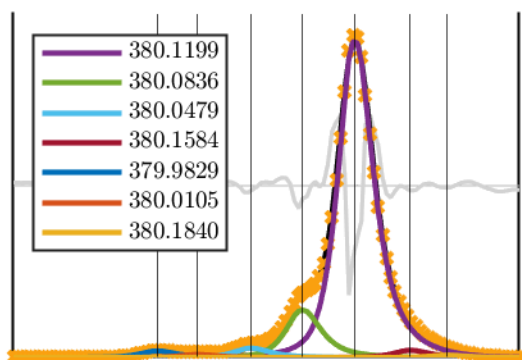

Final fit

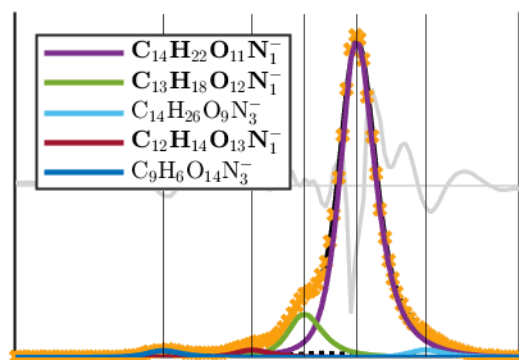

Manual fit

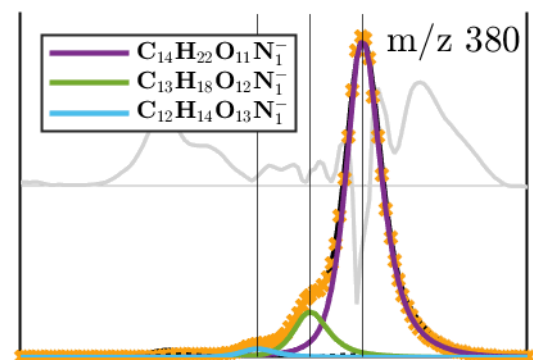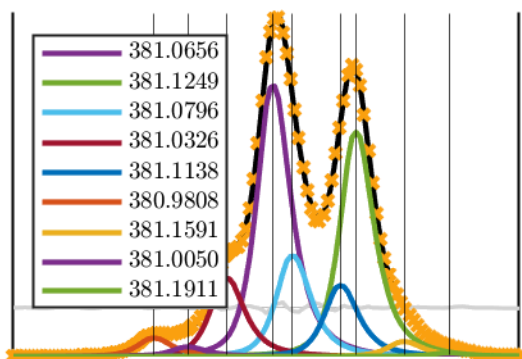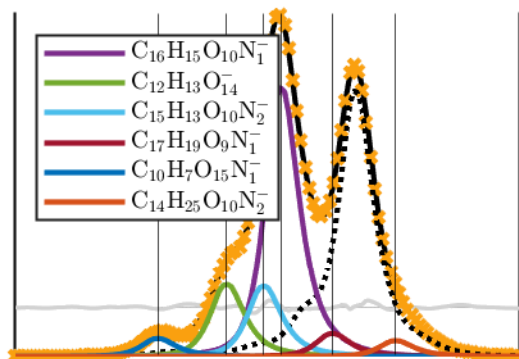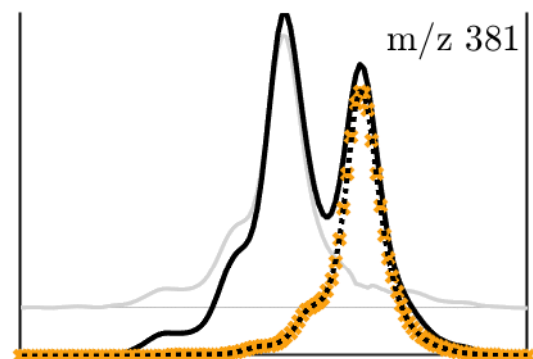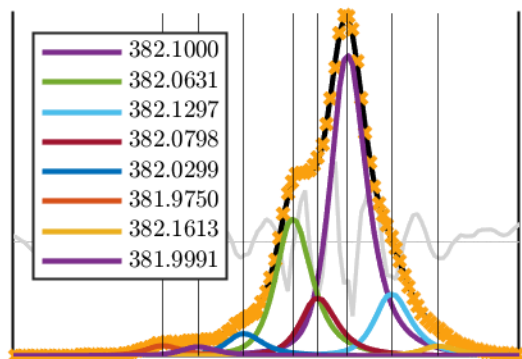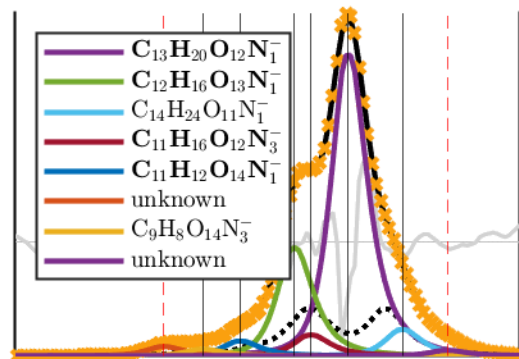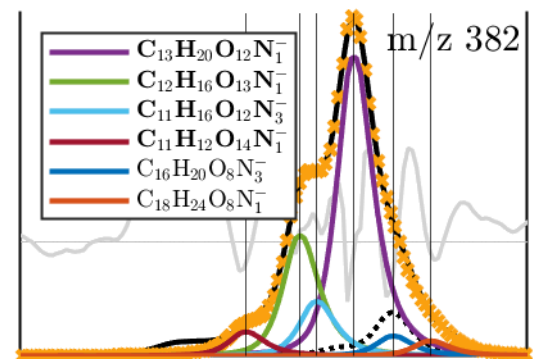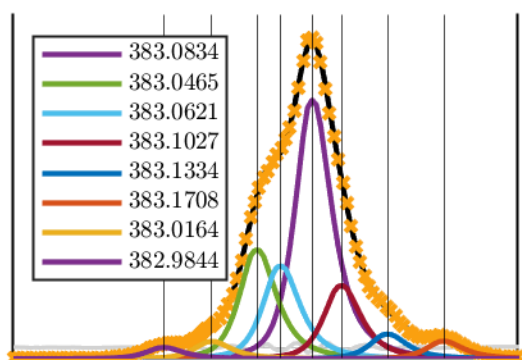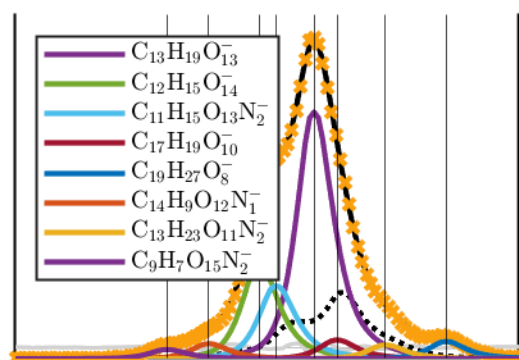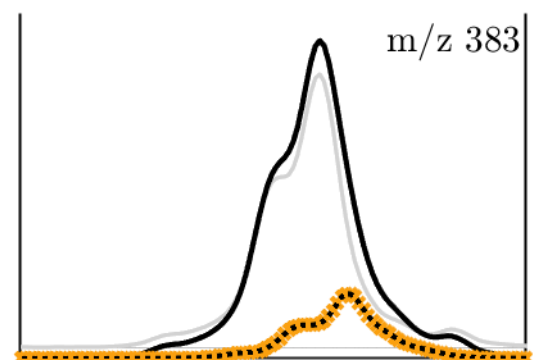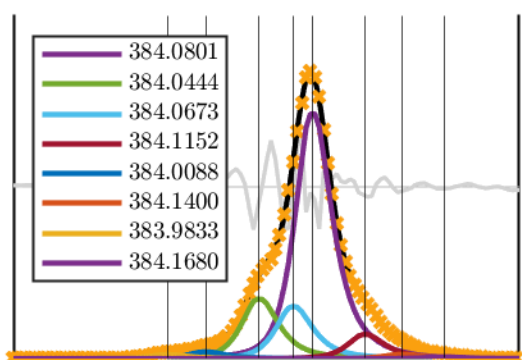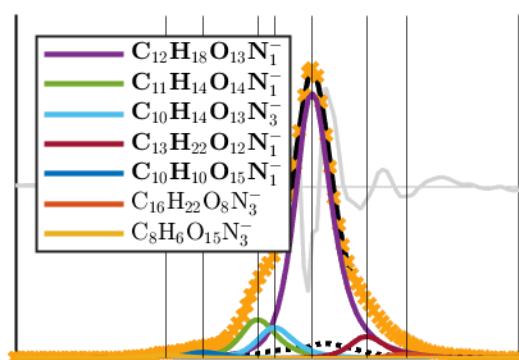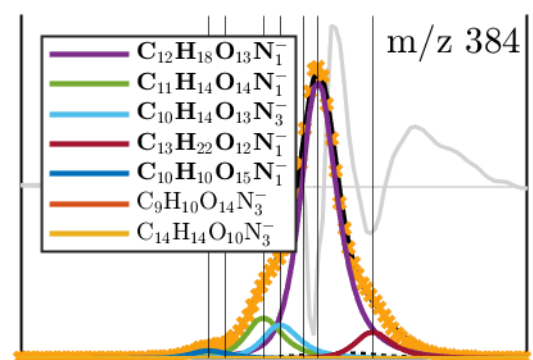

Free fit

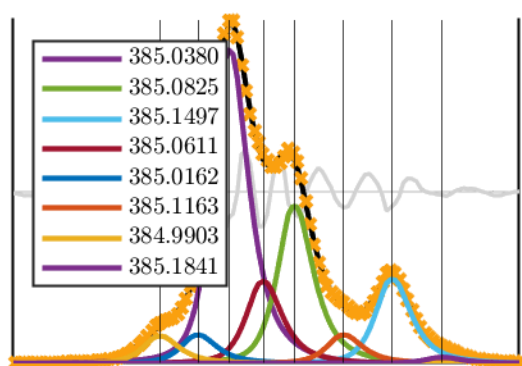

Final fit

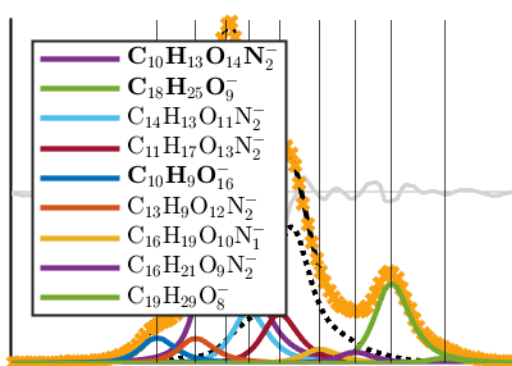

Manual fit

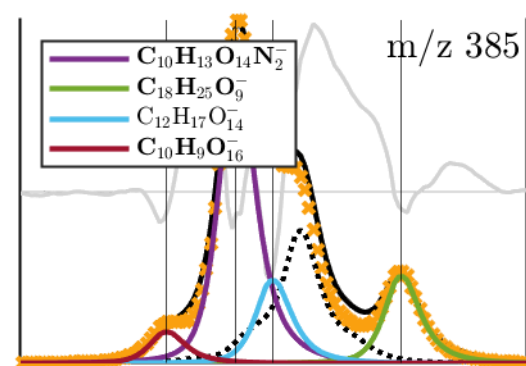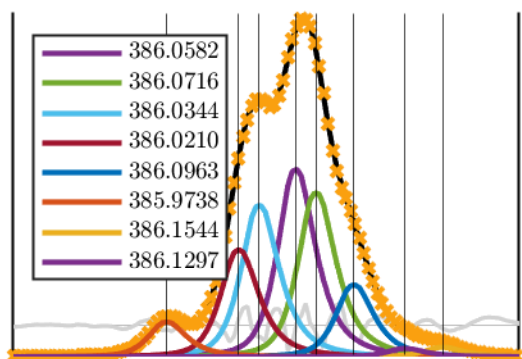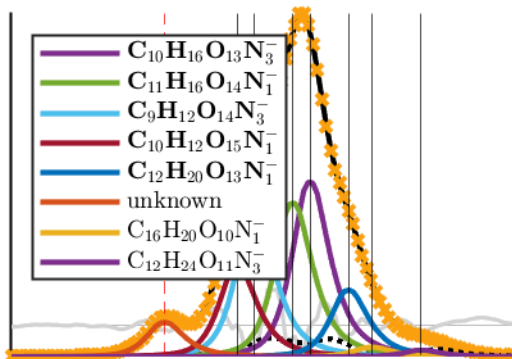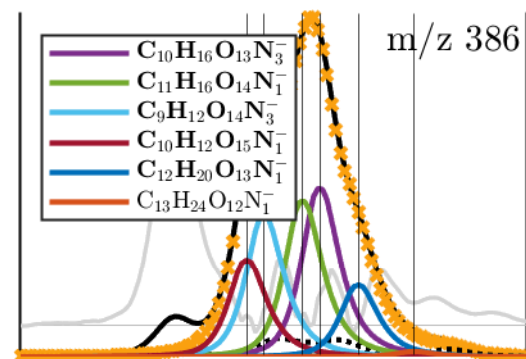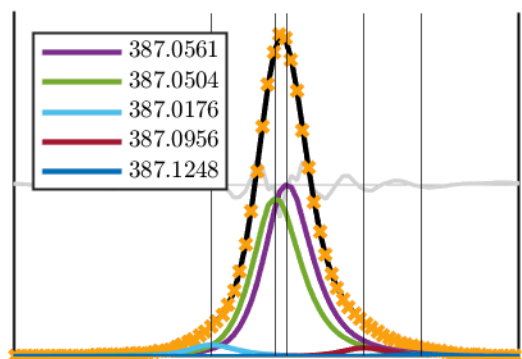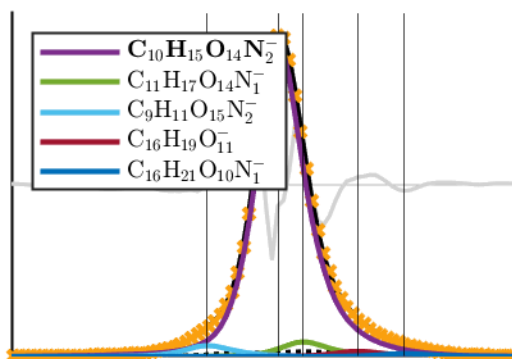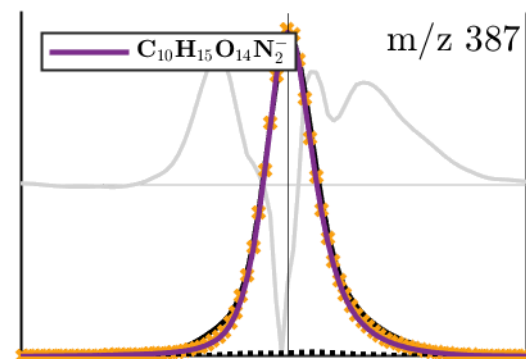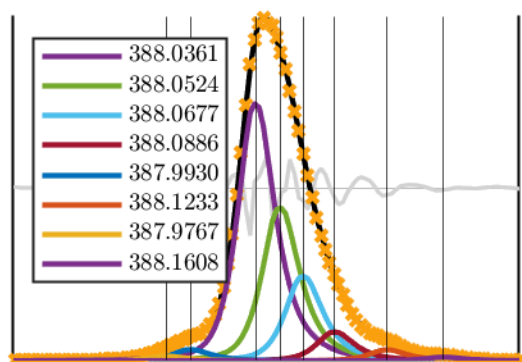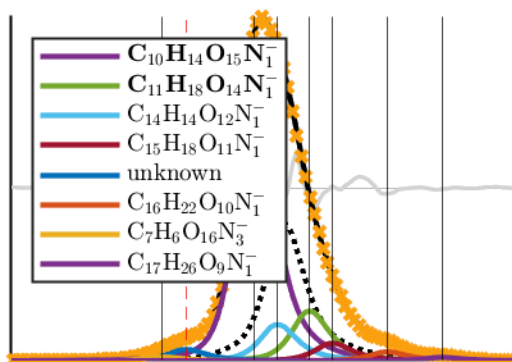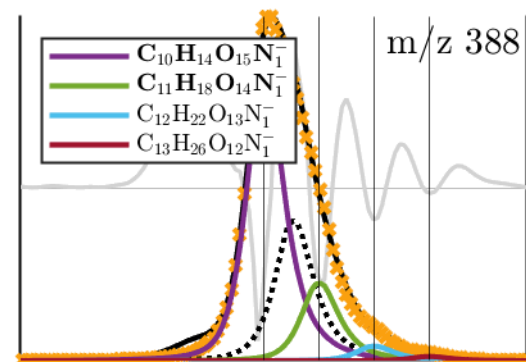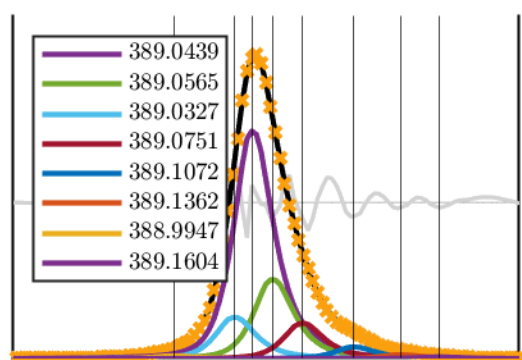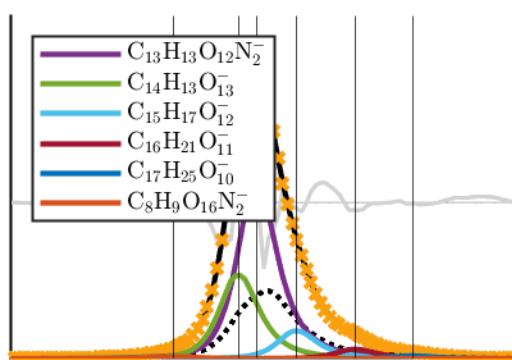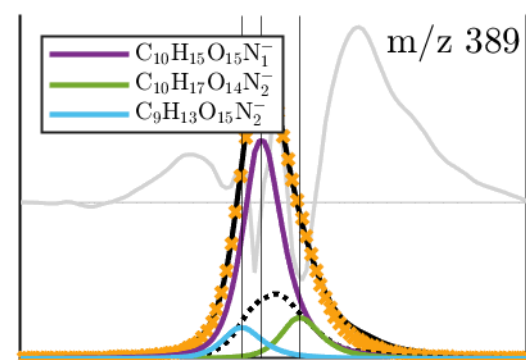

Free fit

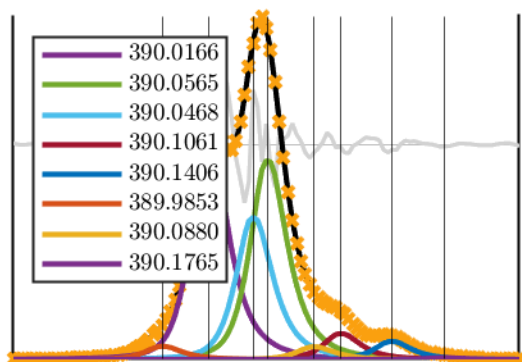

Final fit

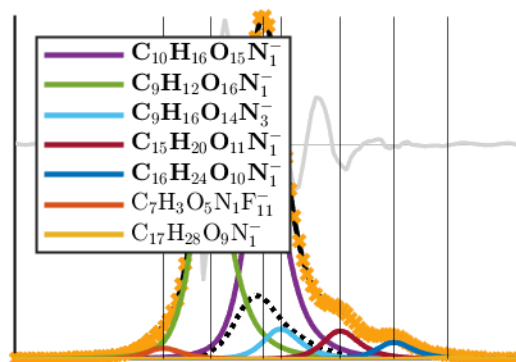

Manual fit

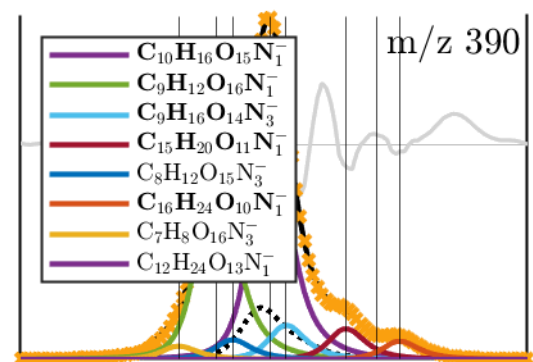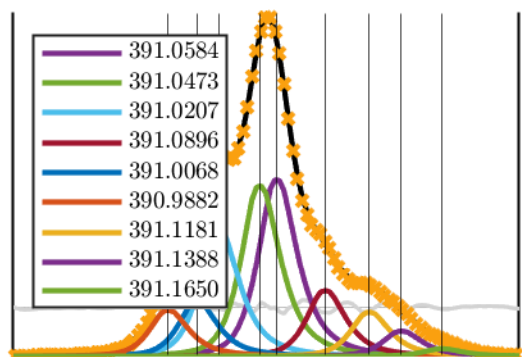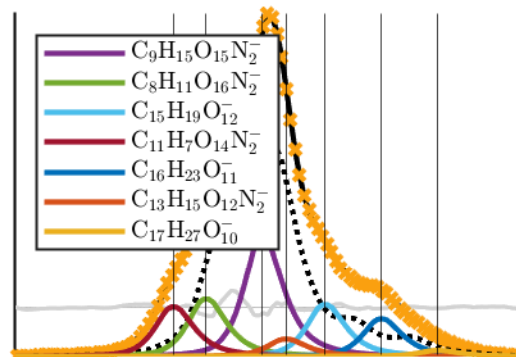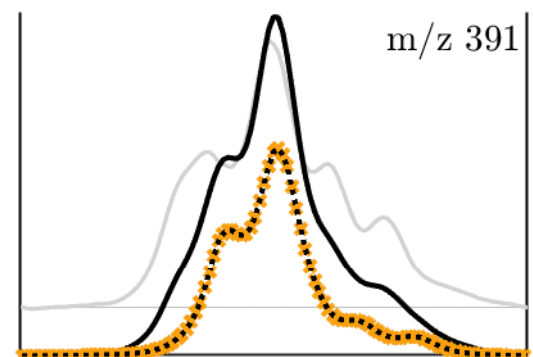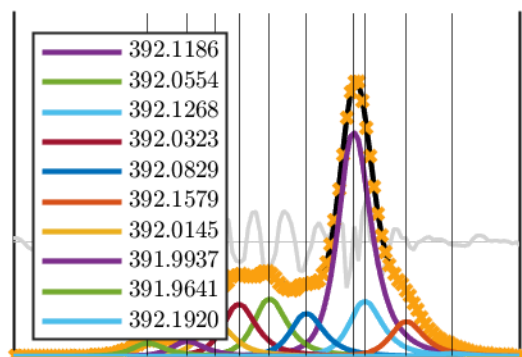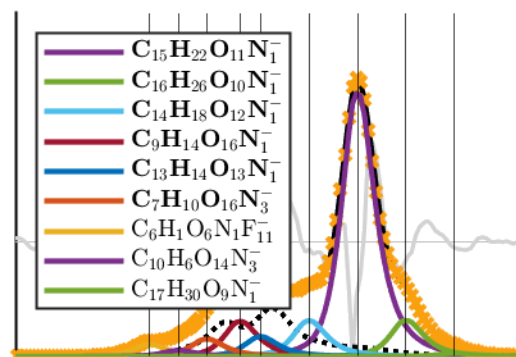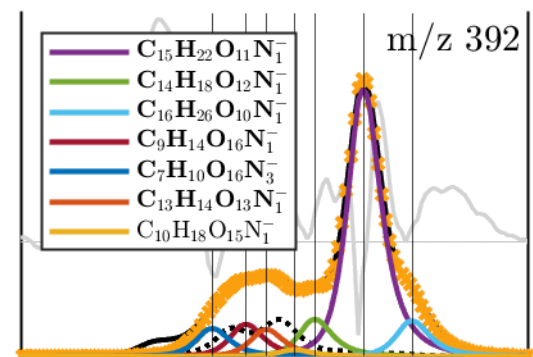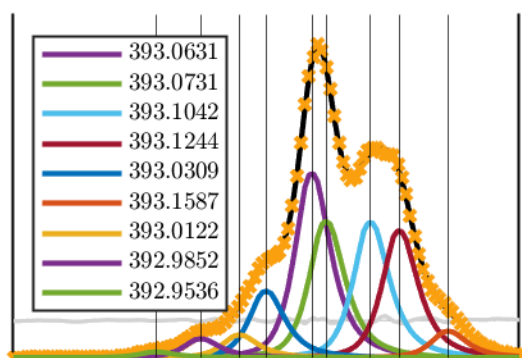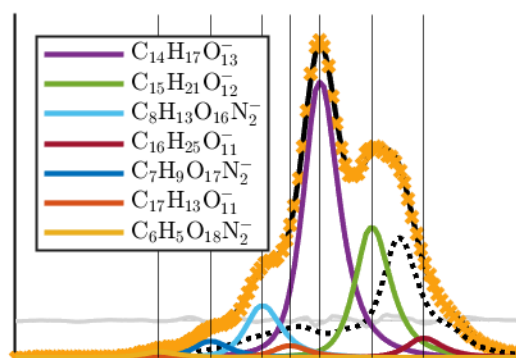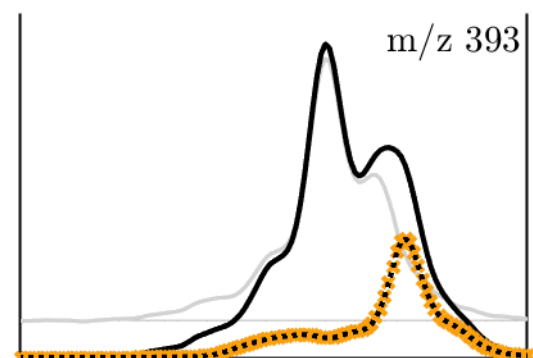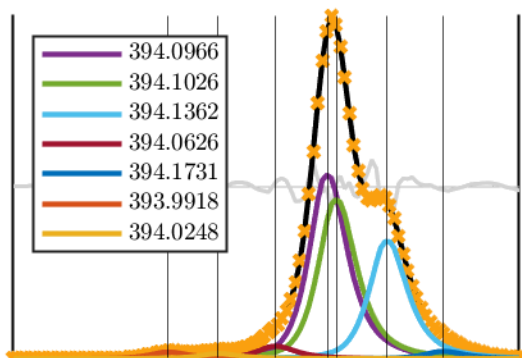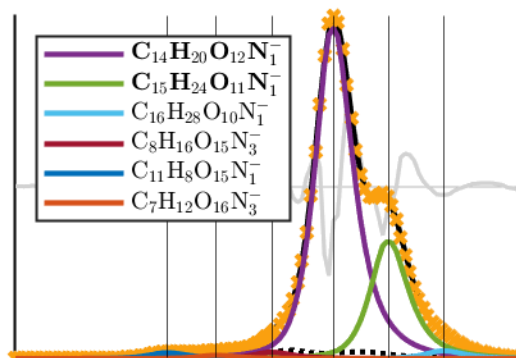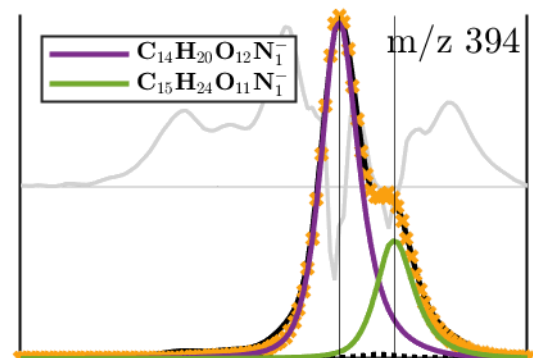



Free fit

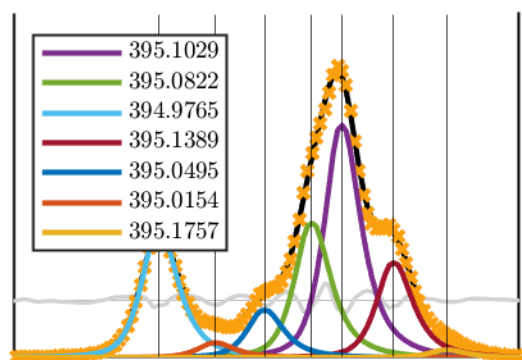

Final fit

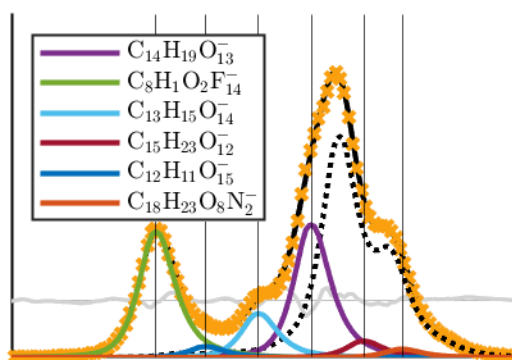

Manual fit

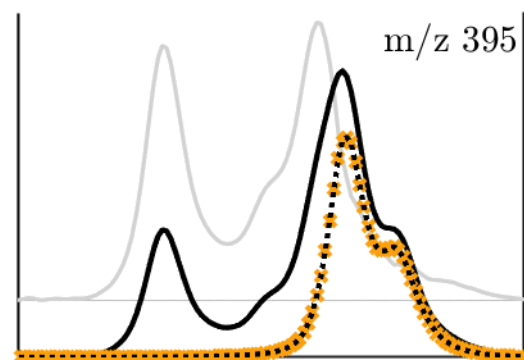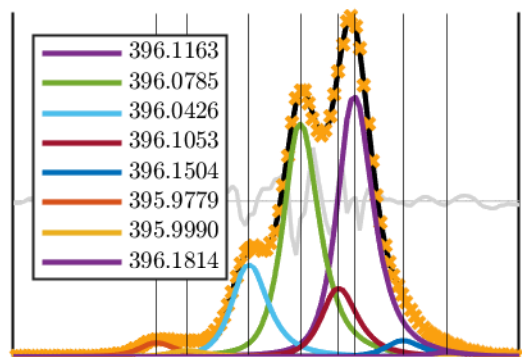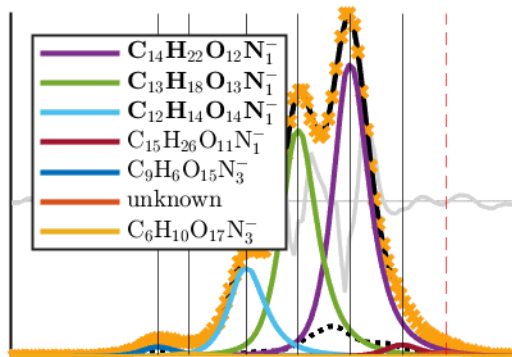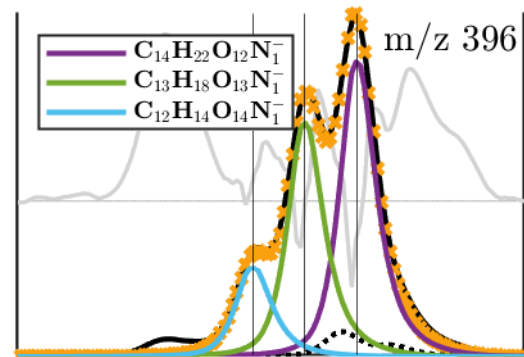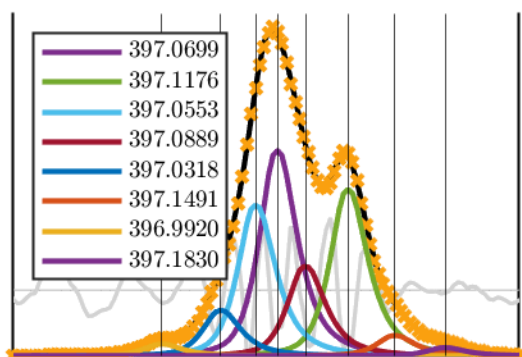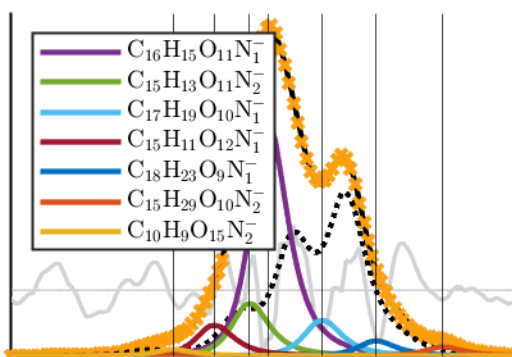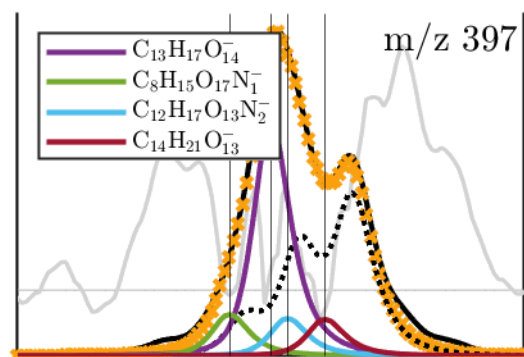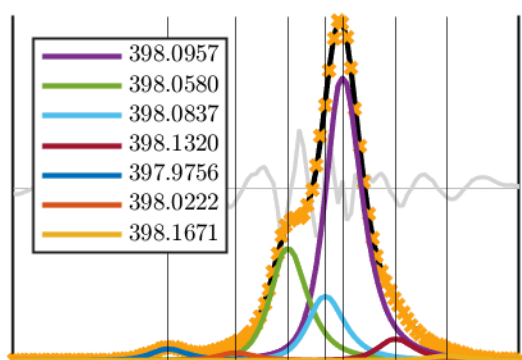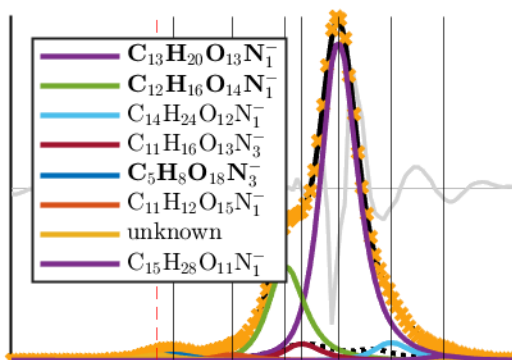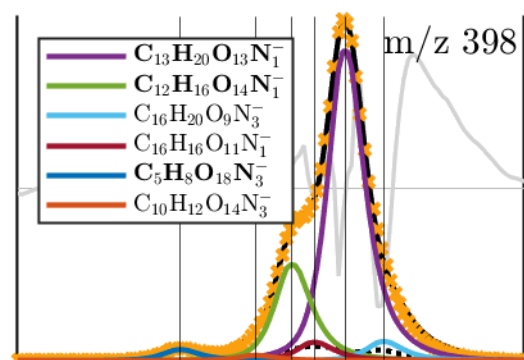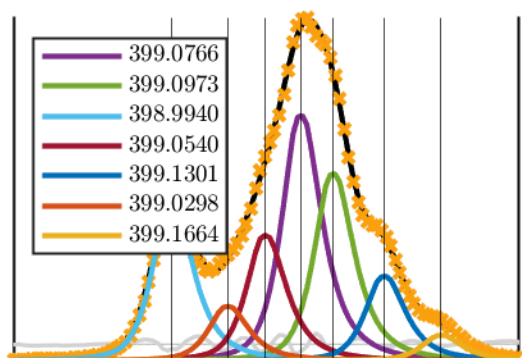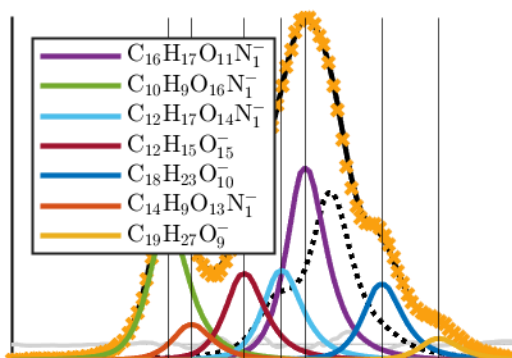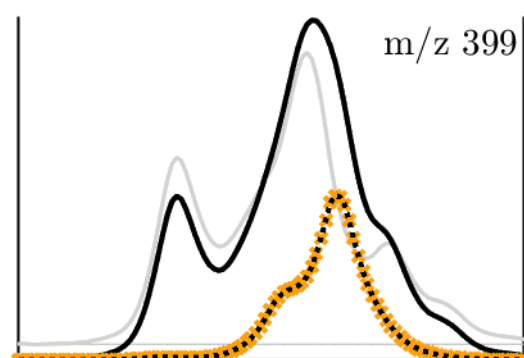



Free fit

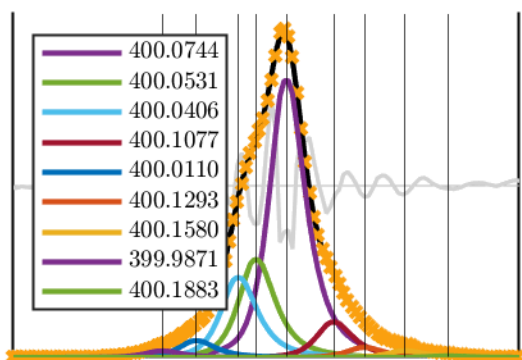

Final fit

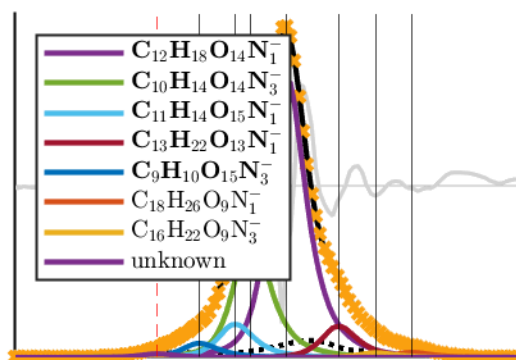

Manual fit

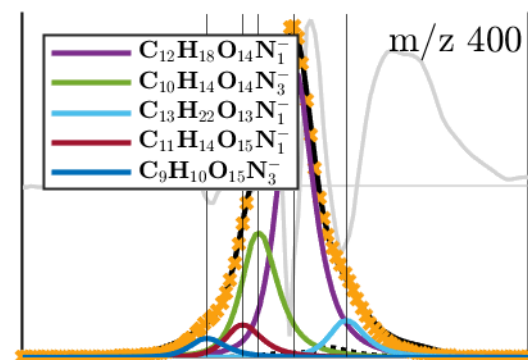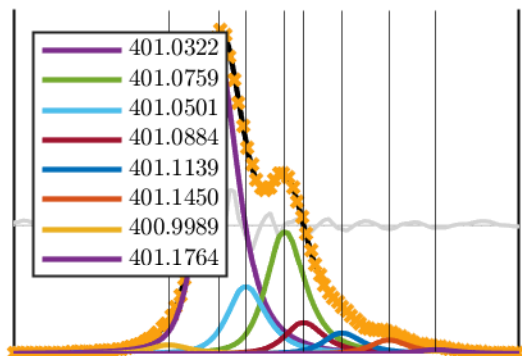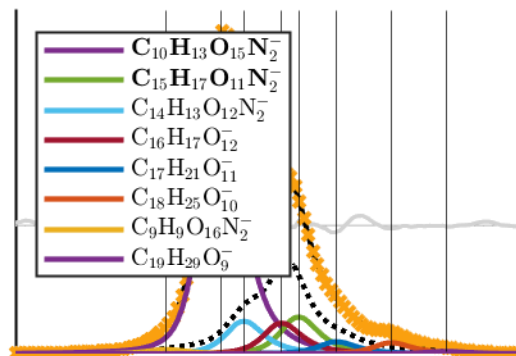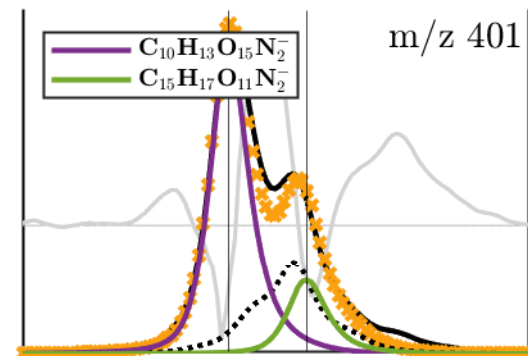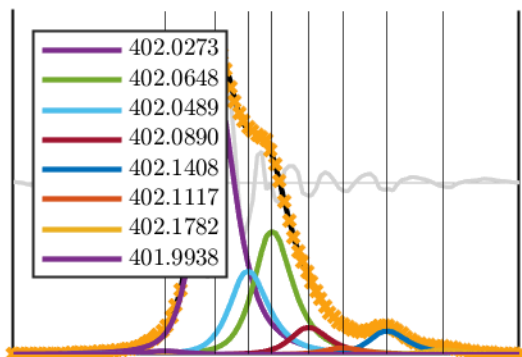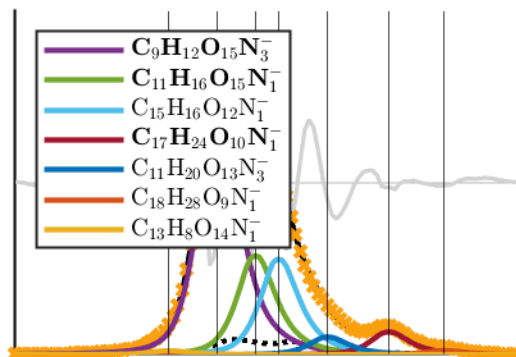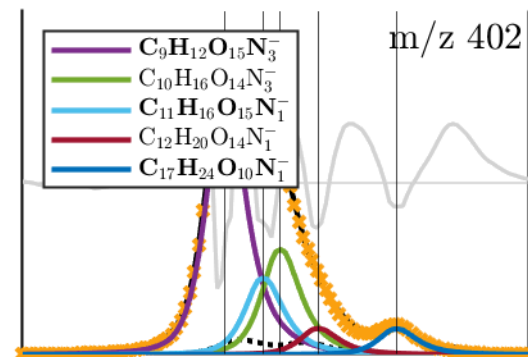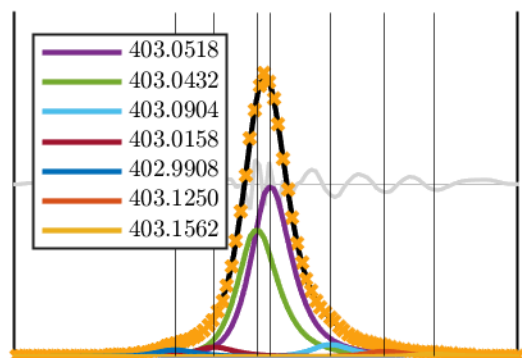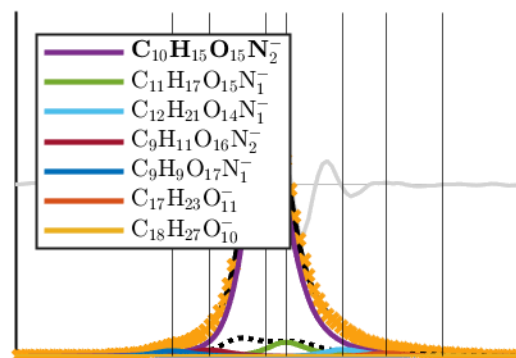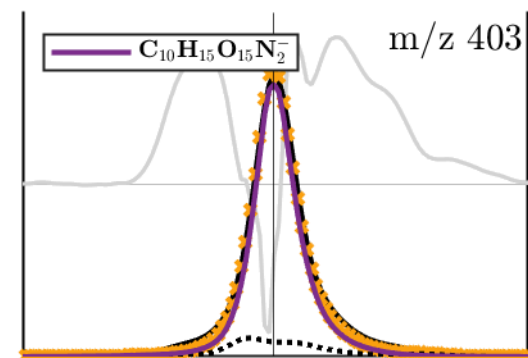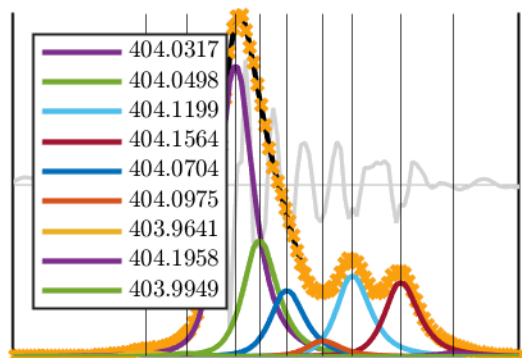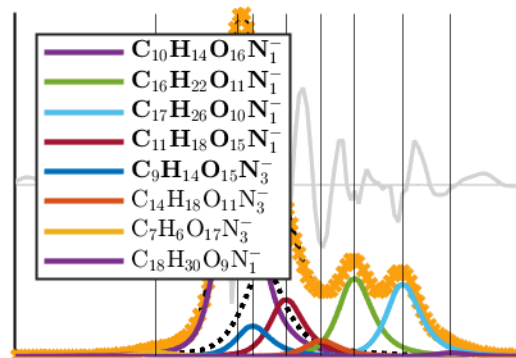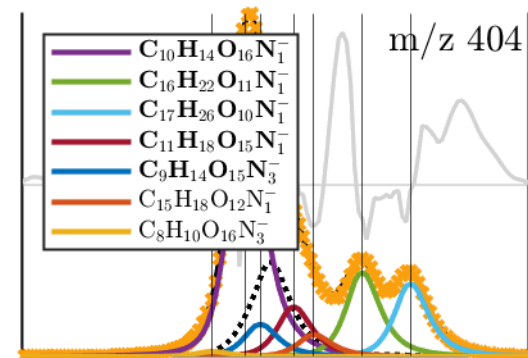

Free fit

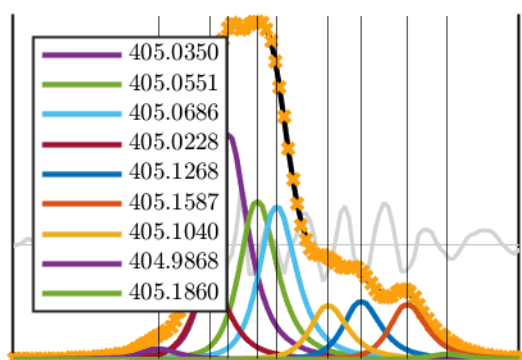

Final fit

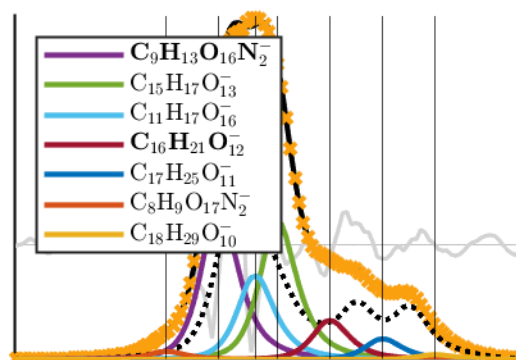

Manual fit

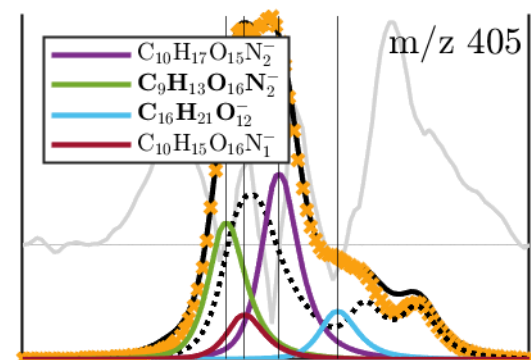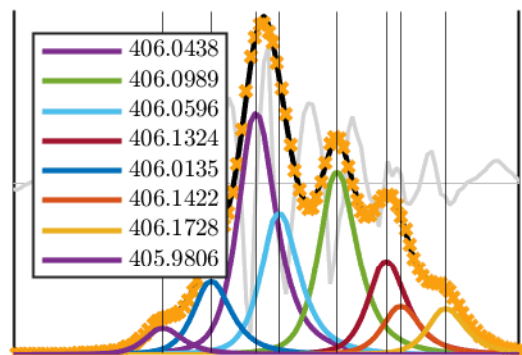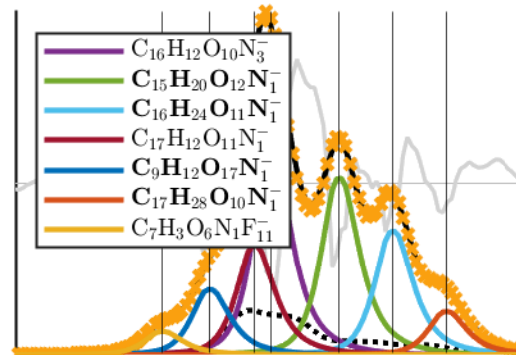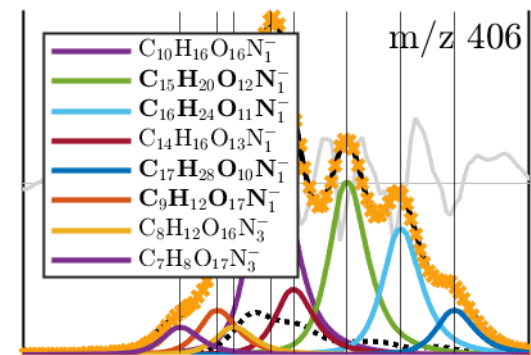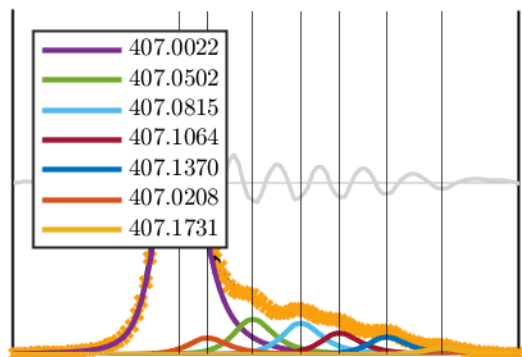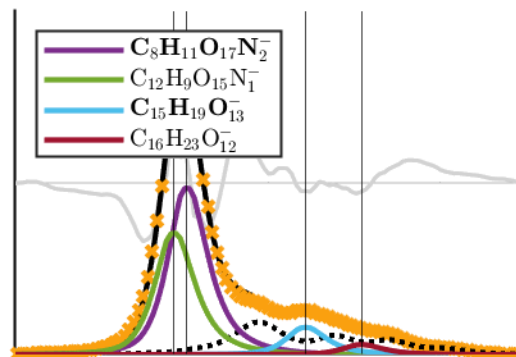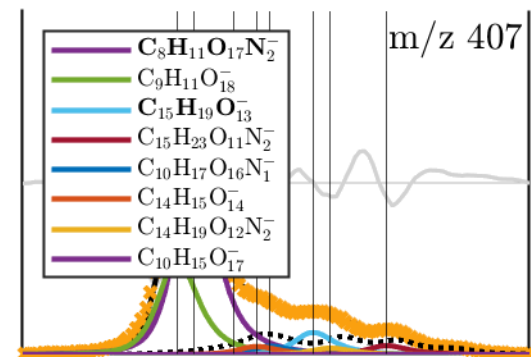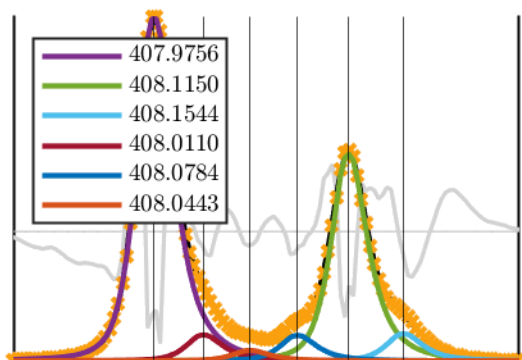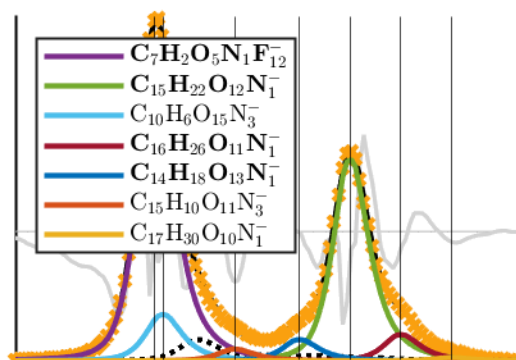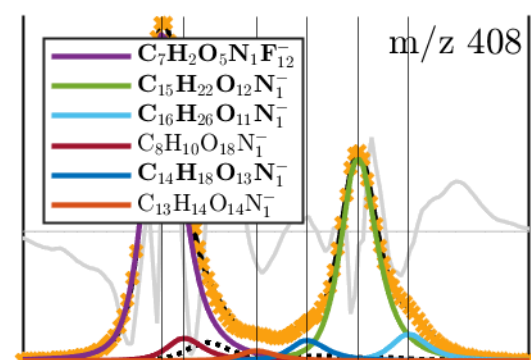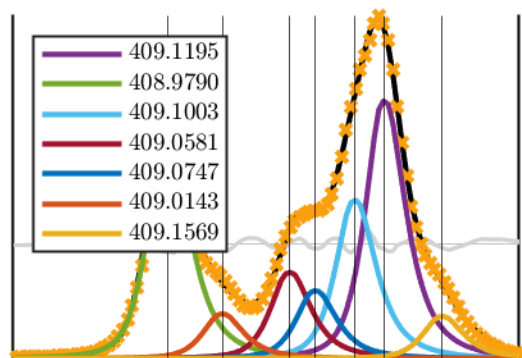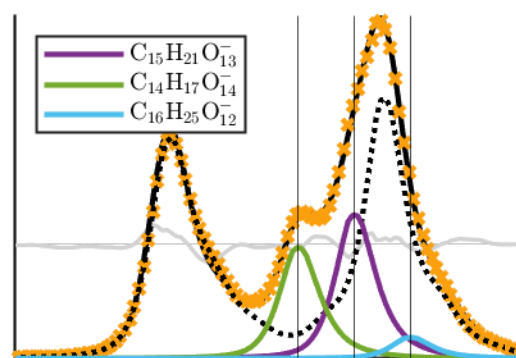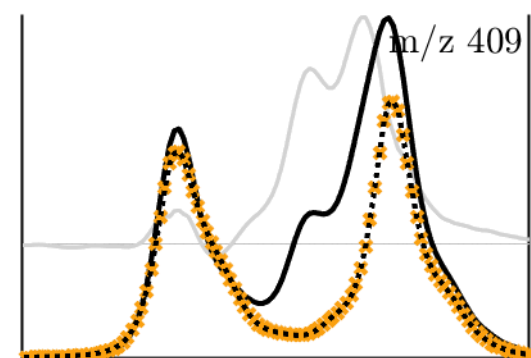

Free fit

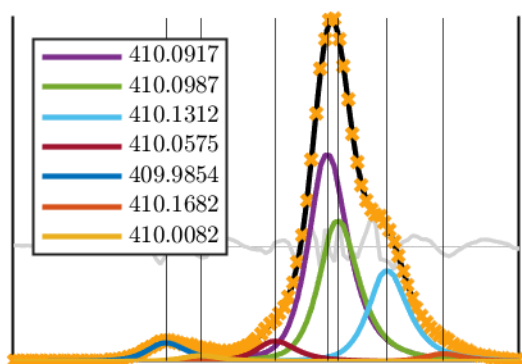

Final fit

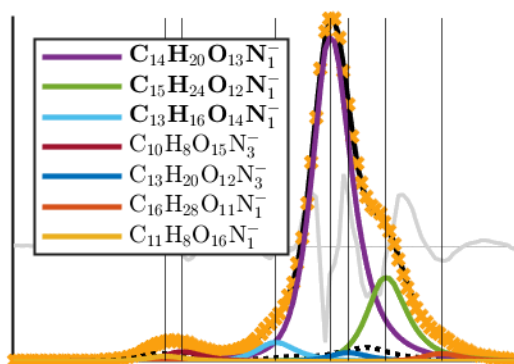

Manual fit

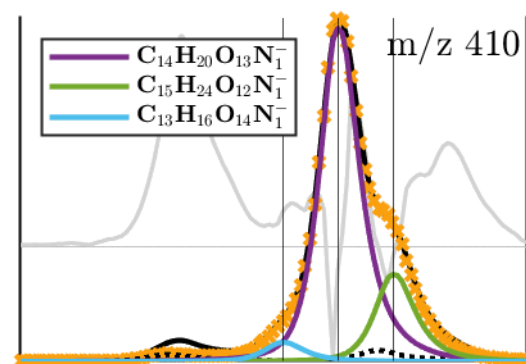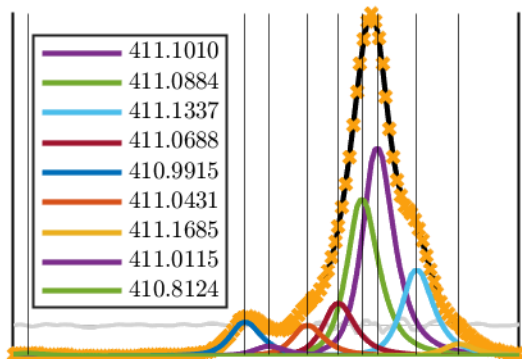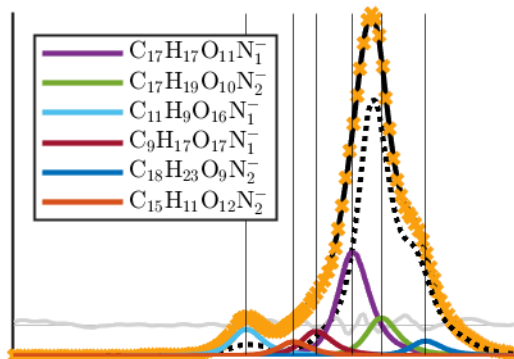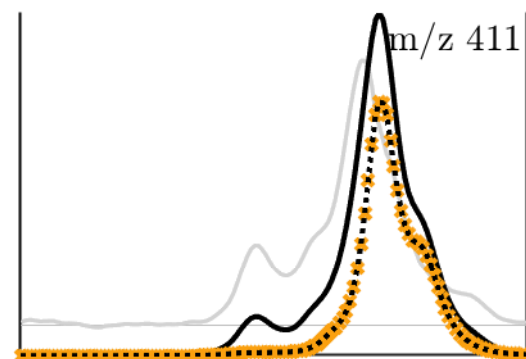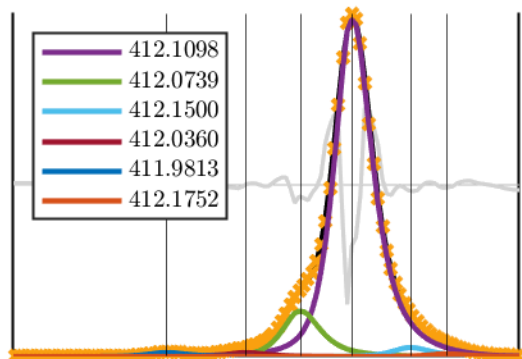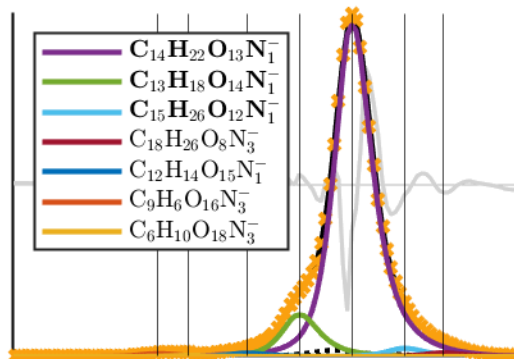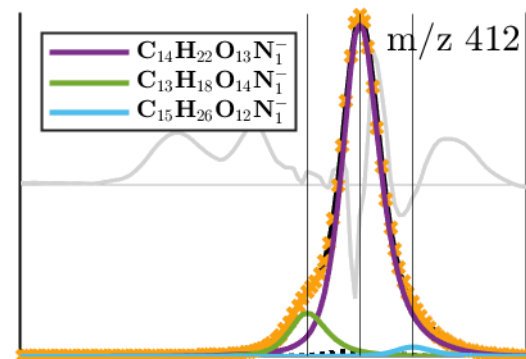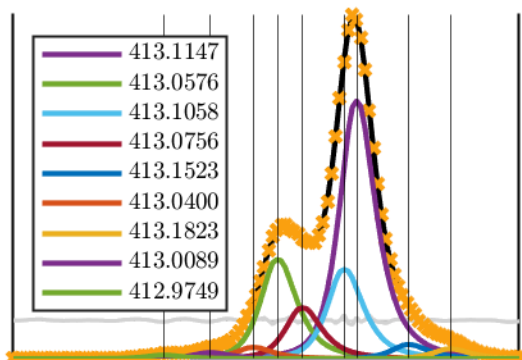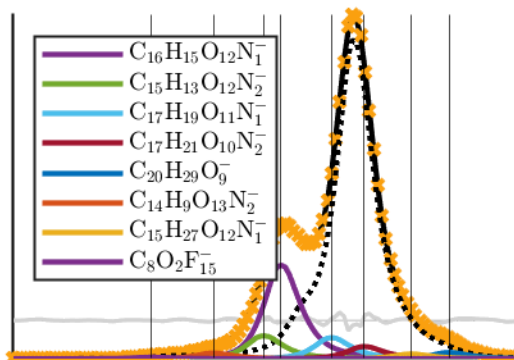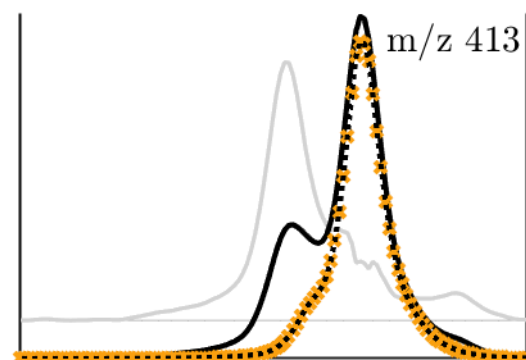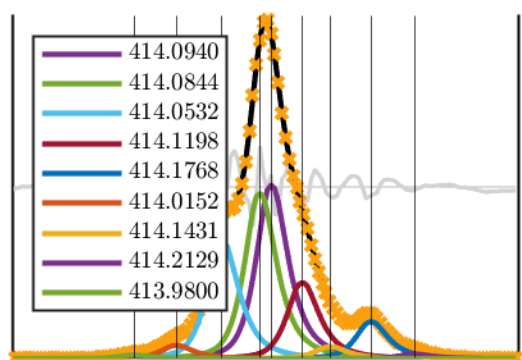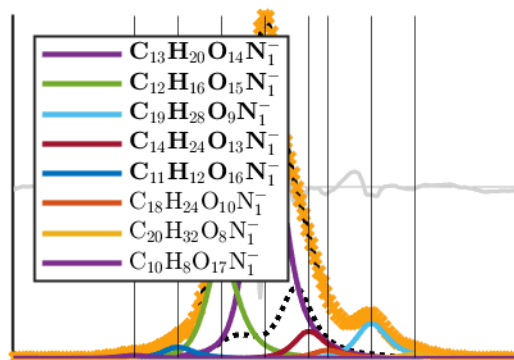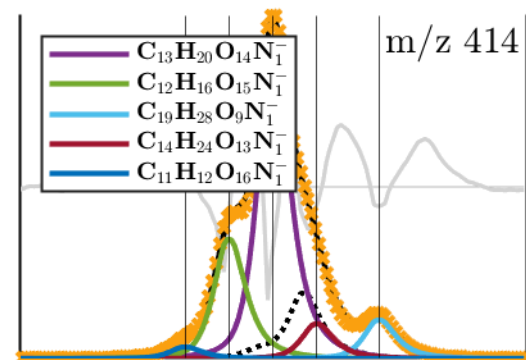



Free fit

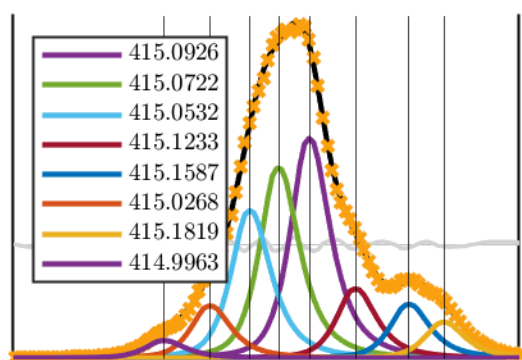

Final fit

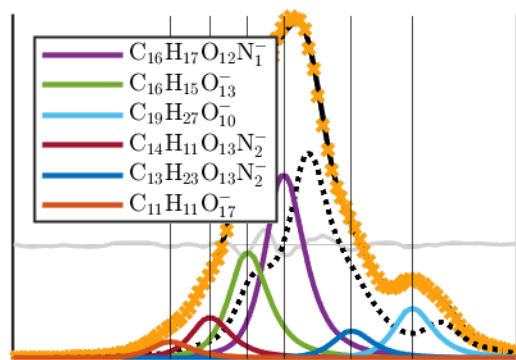

Manual fit

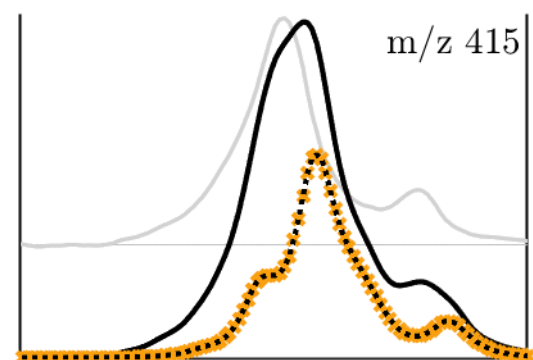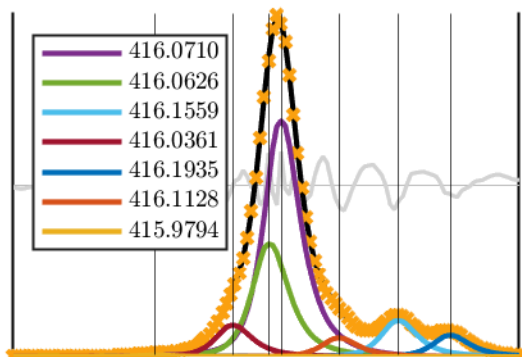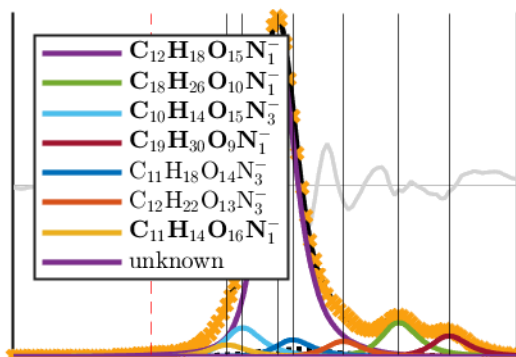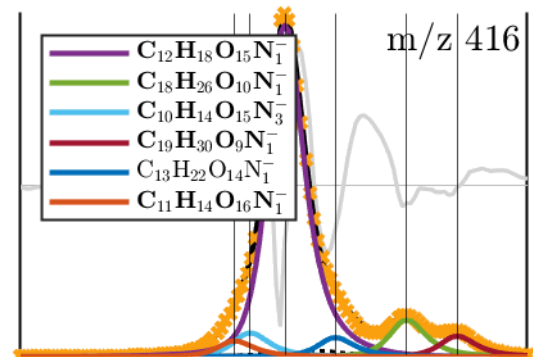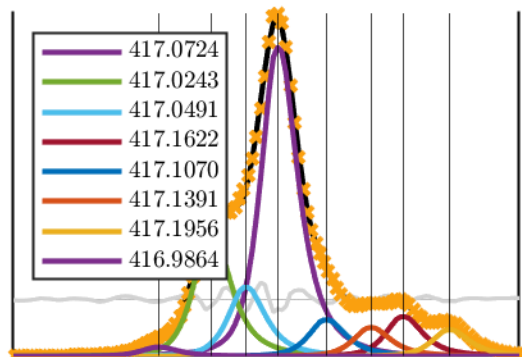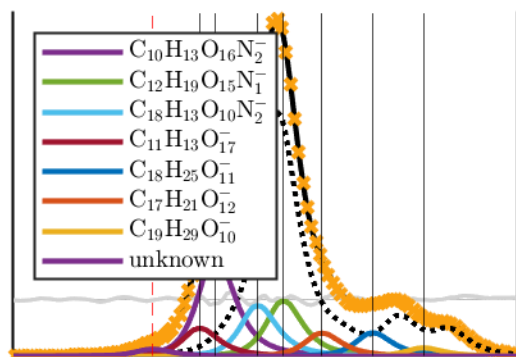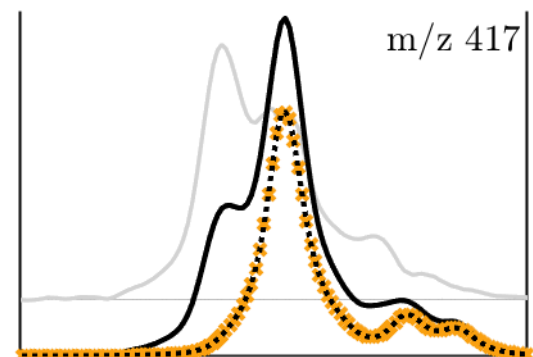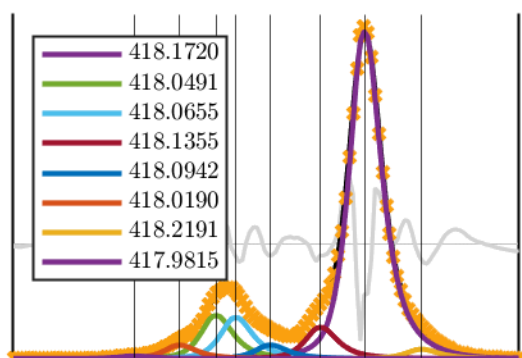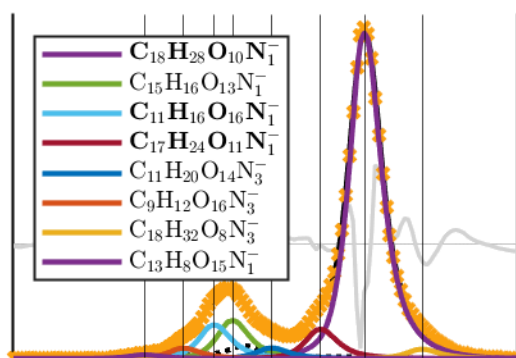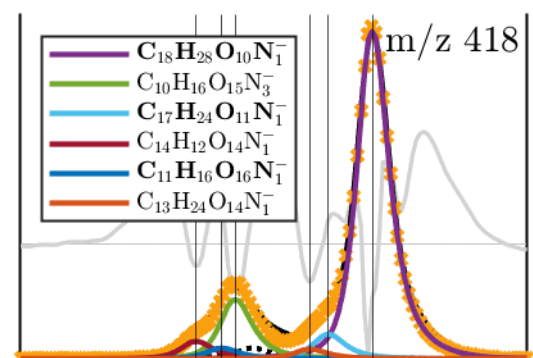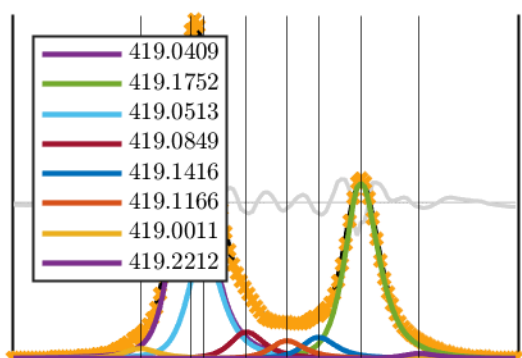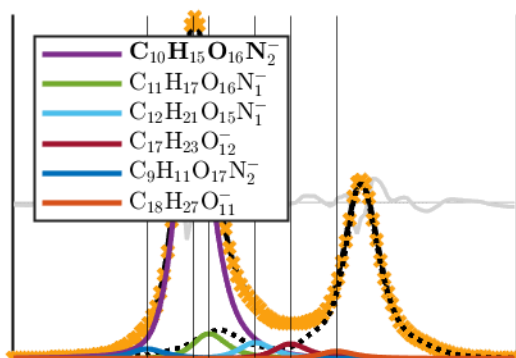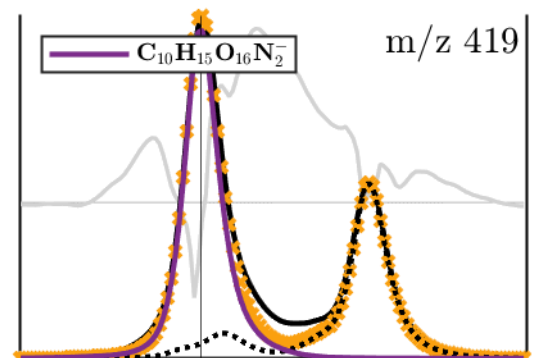



Free fit

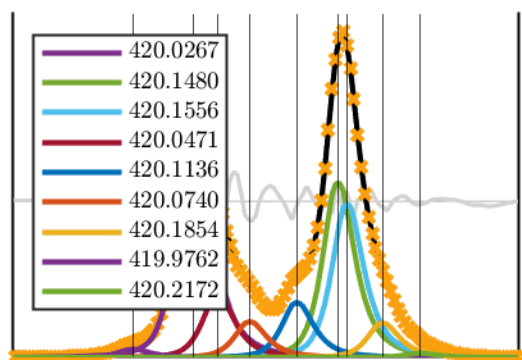

Final fit

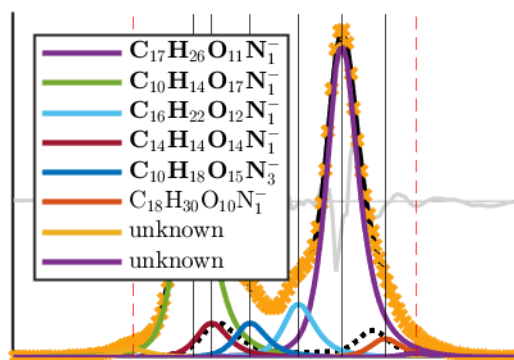

Manual fit

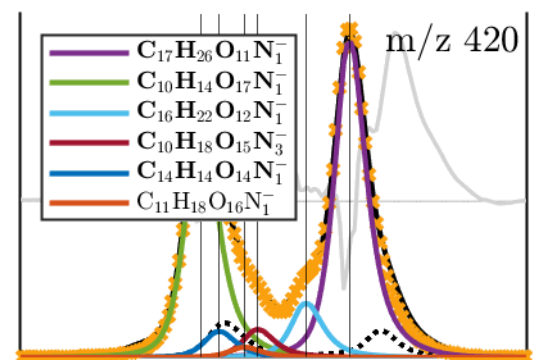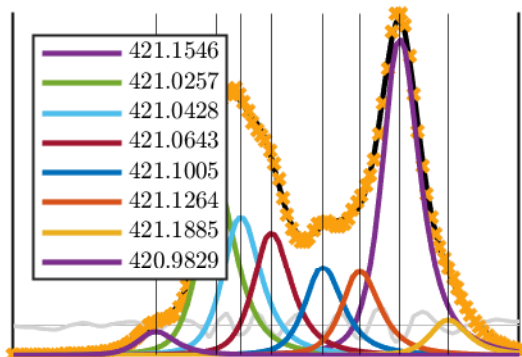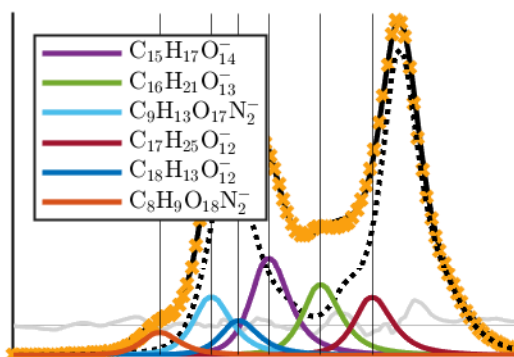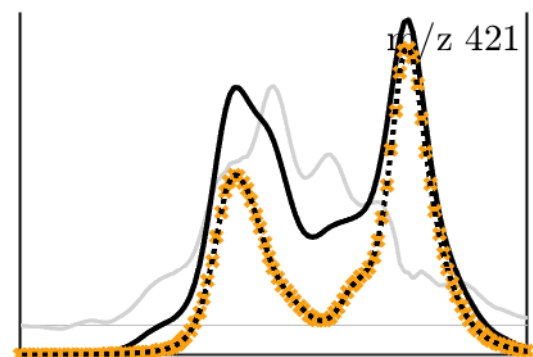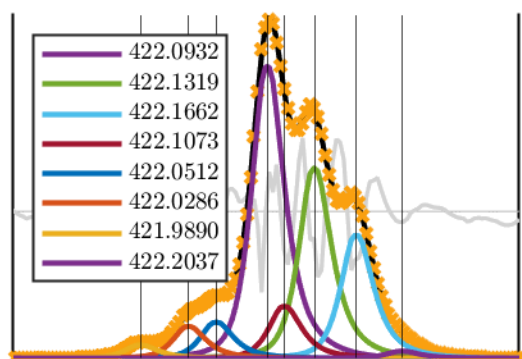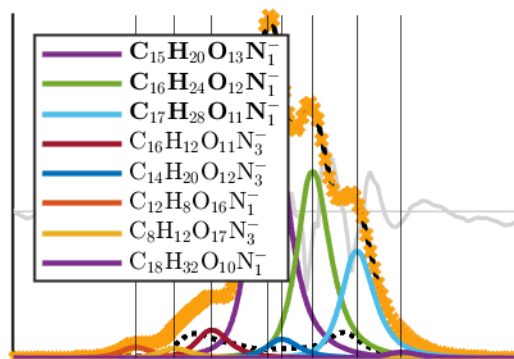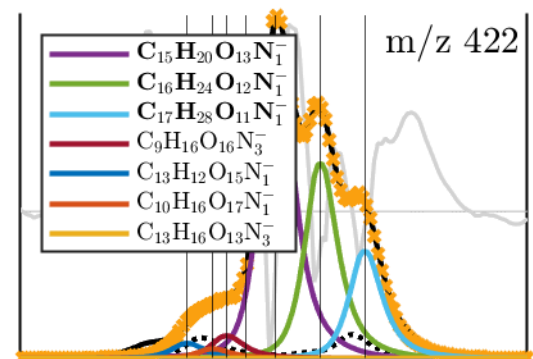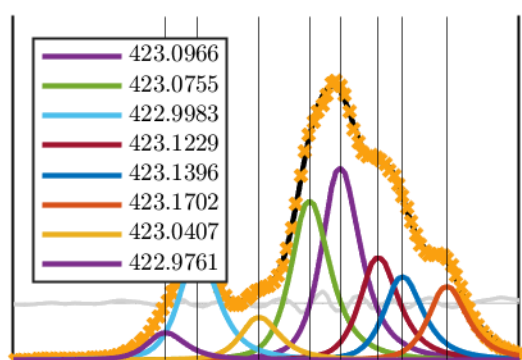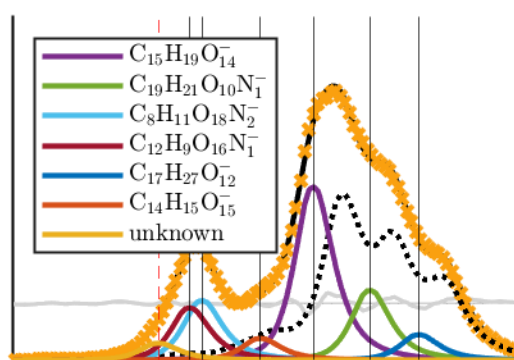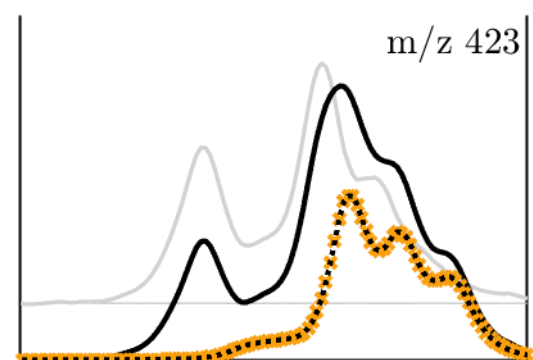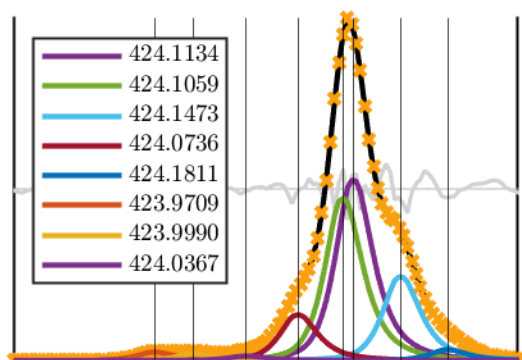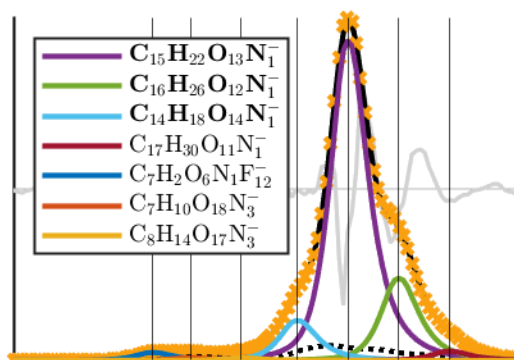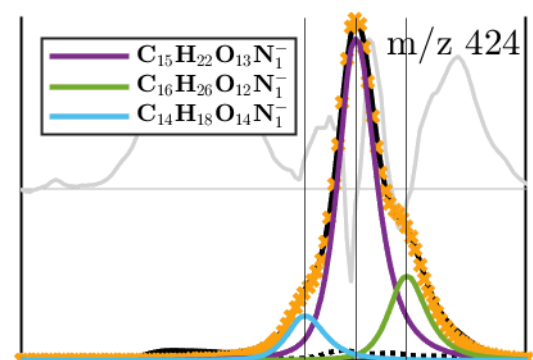

Free fit

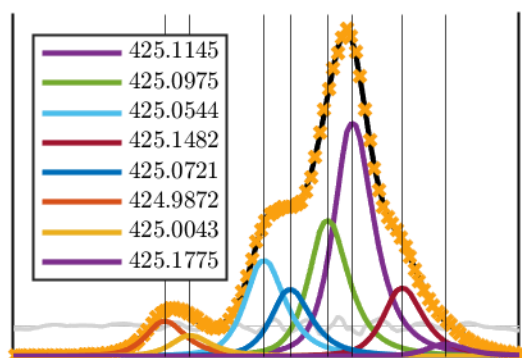

Final fit

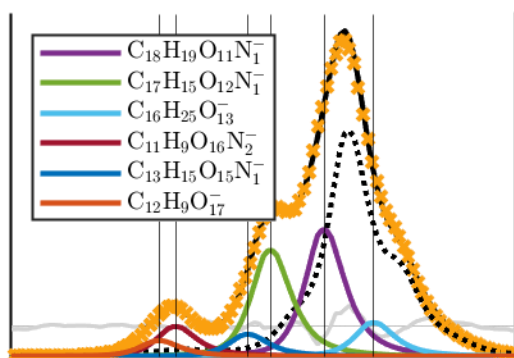

Manual fit

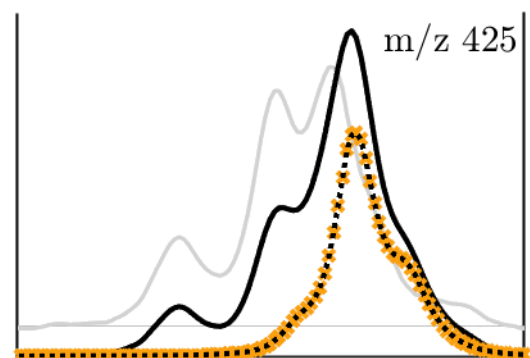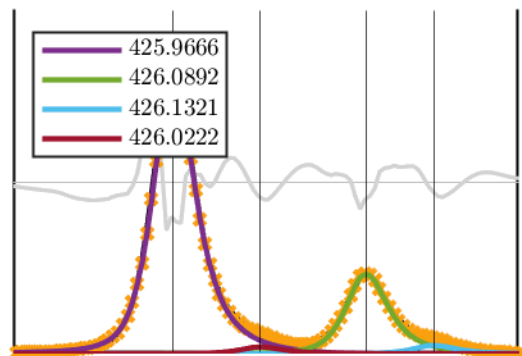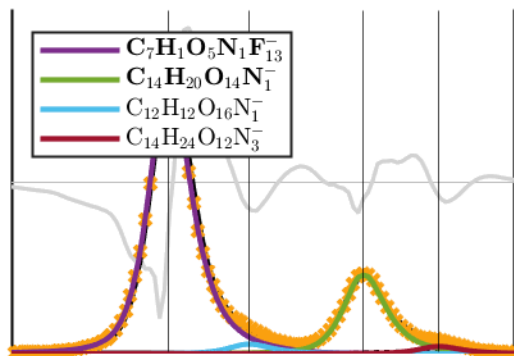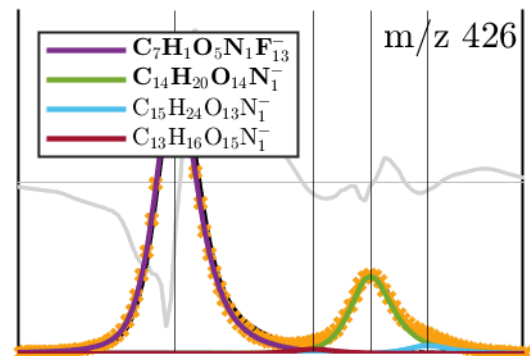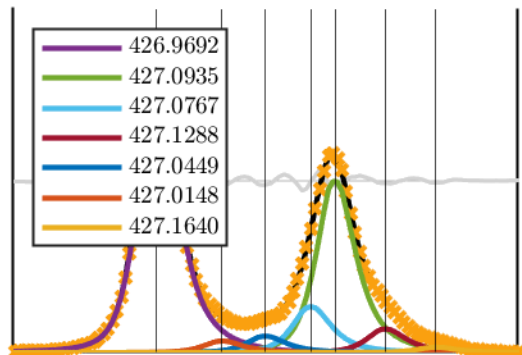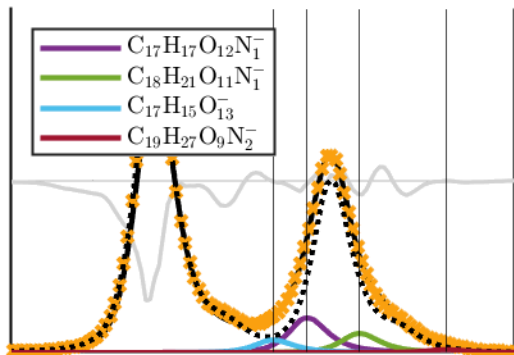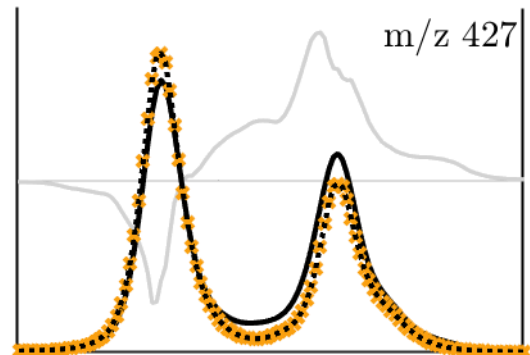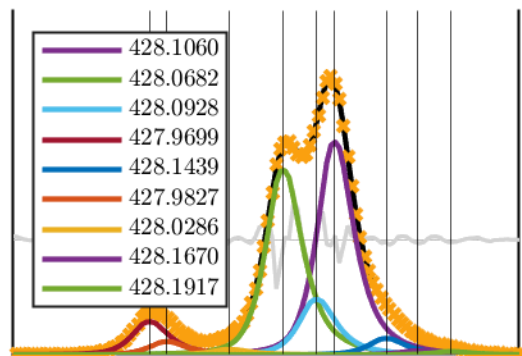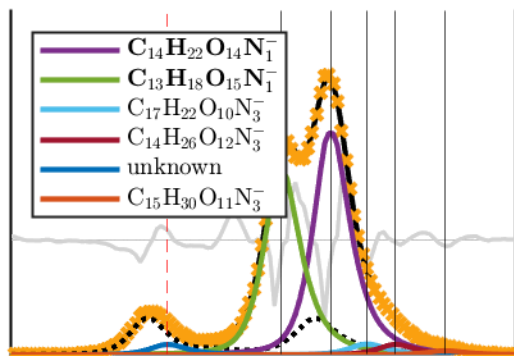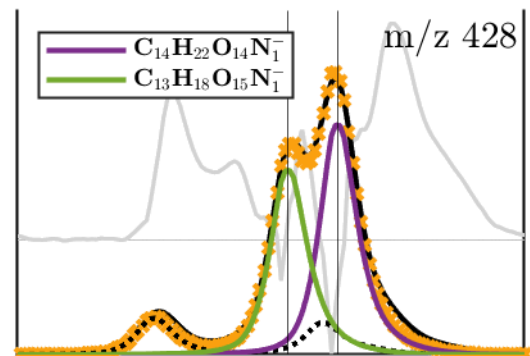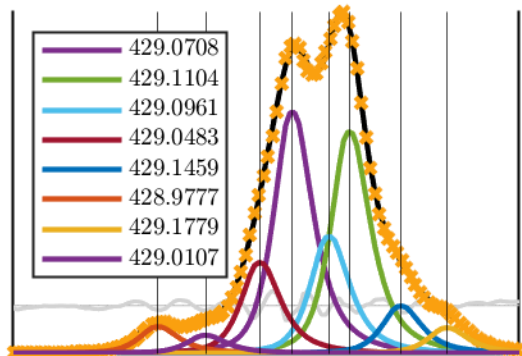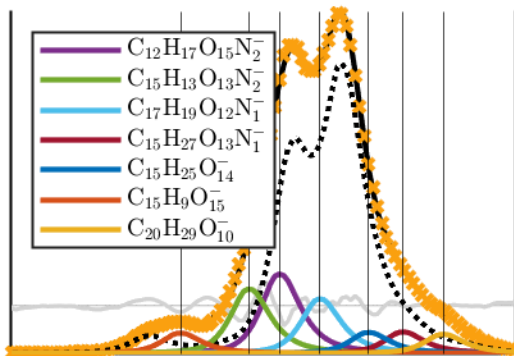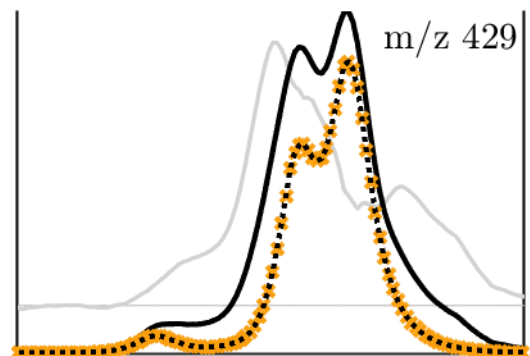

Free fit

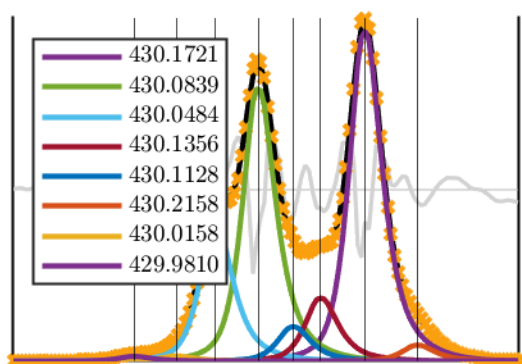

Final fit

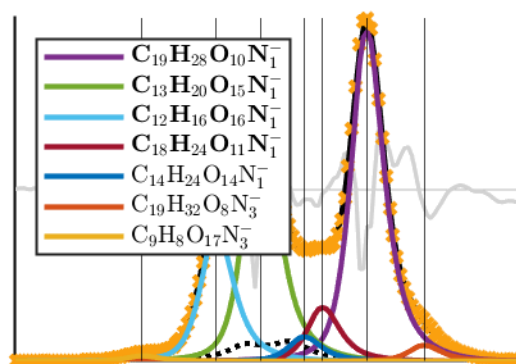

Manual fit

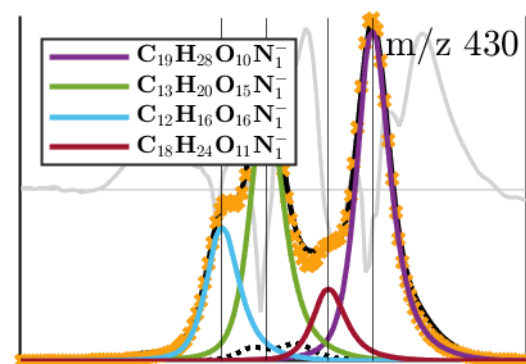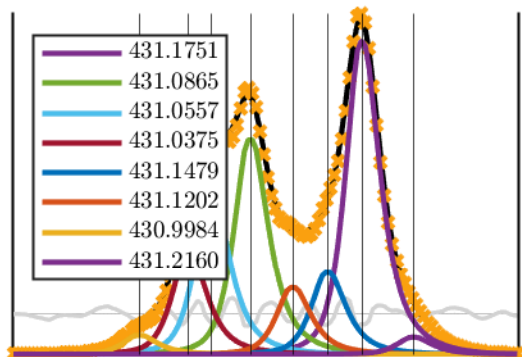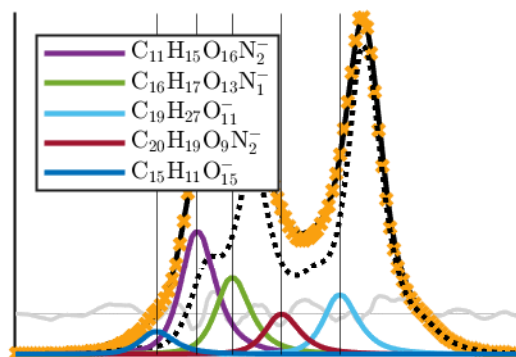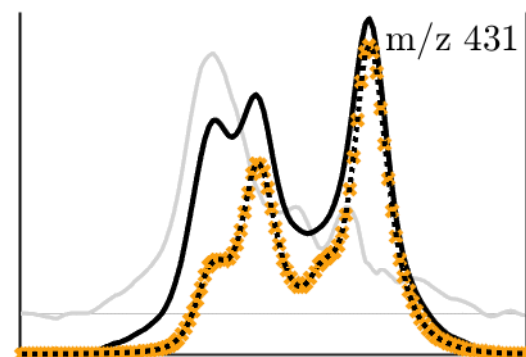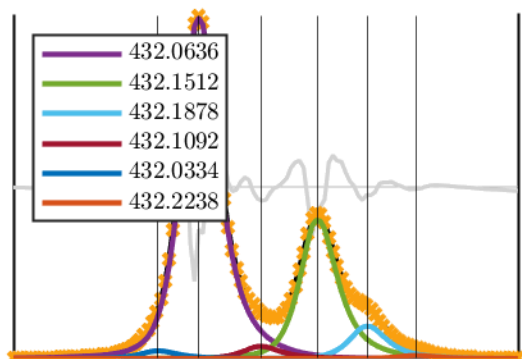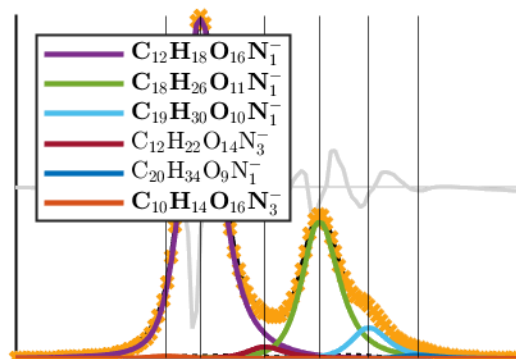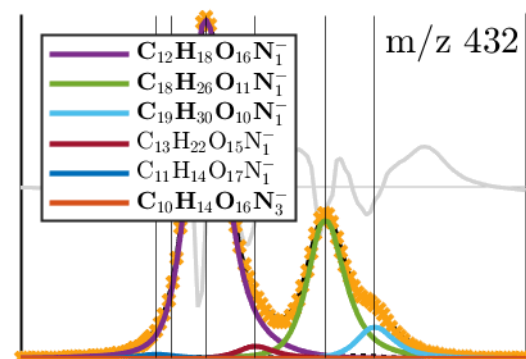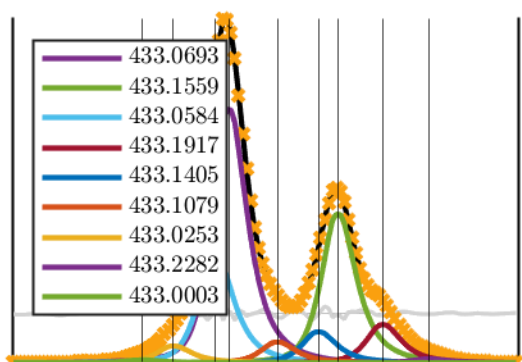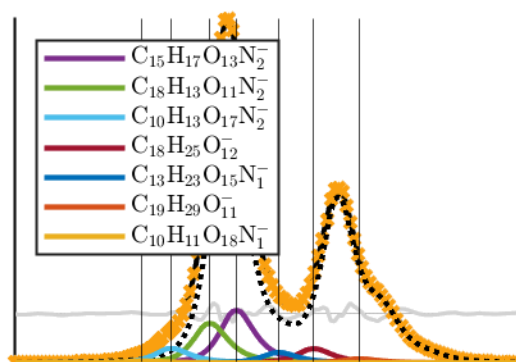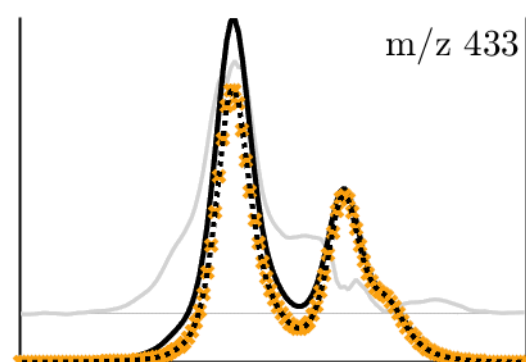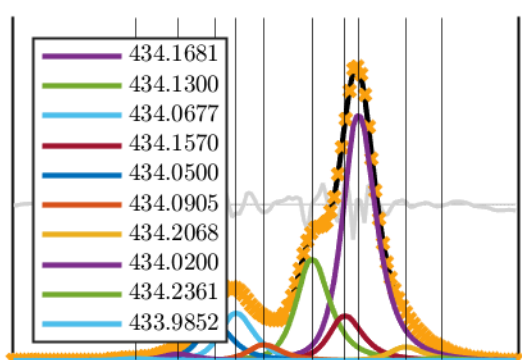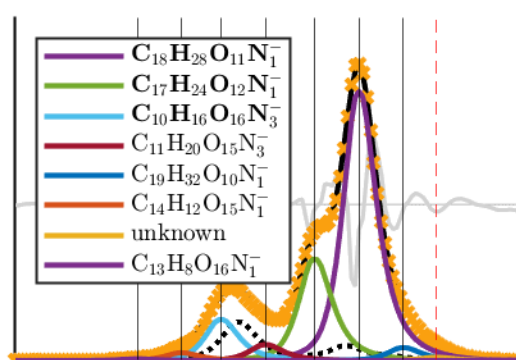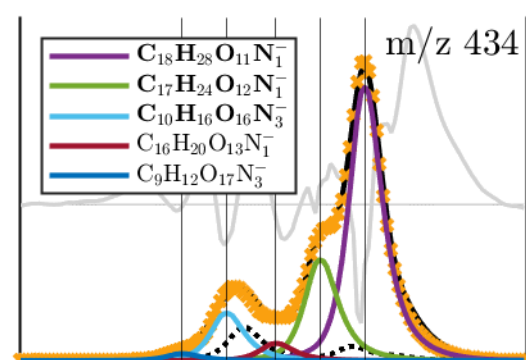



Free fit

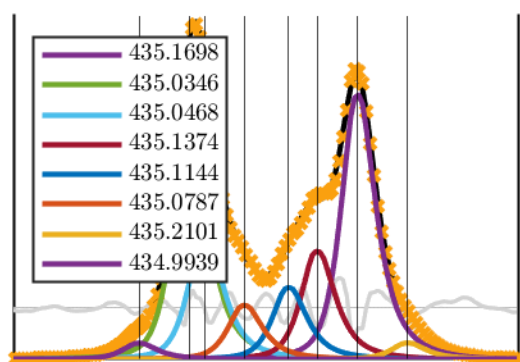

Final fit

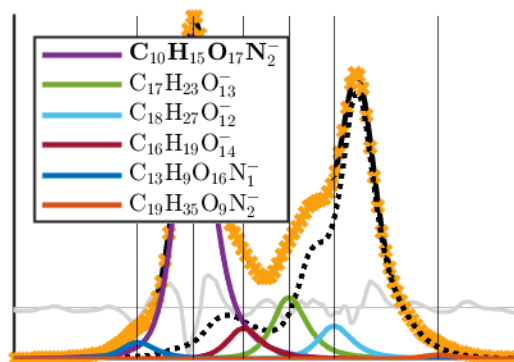

Manual fit

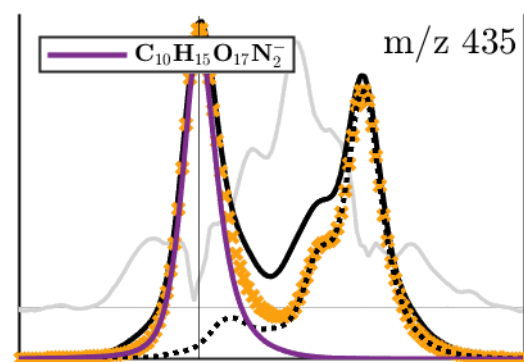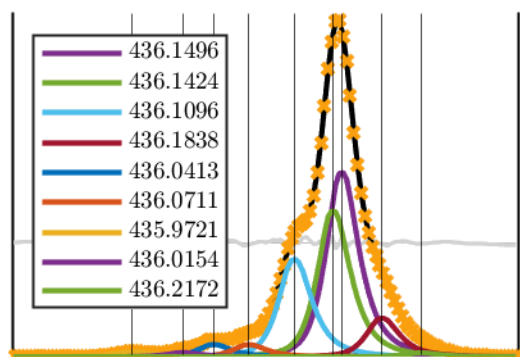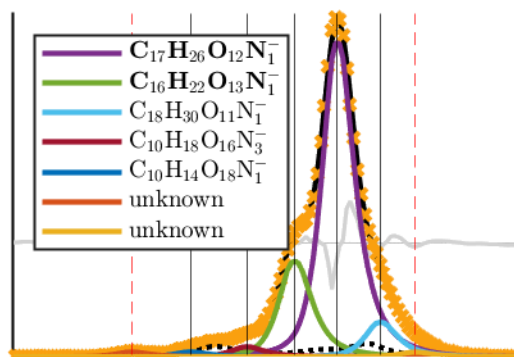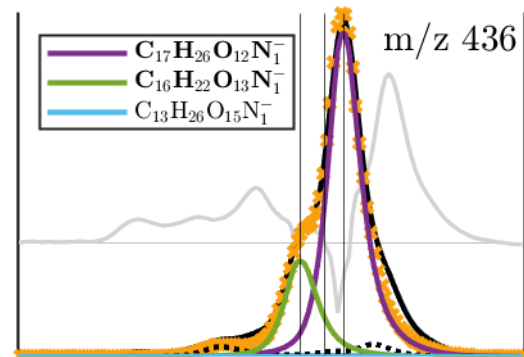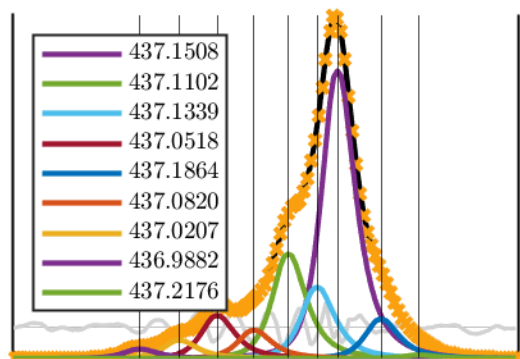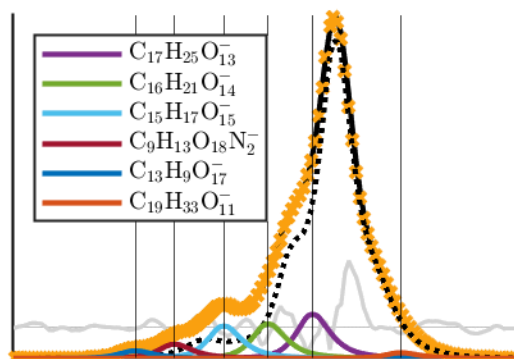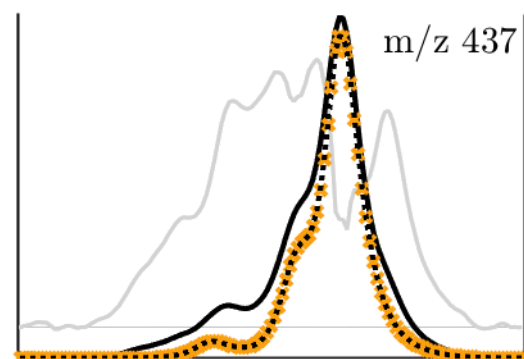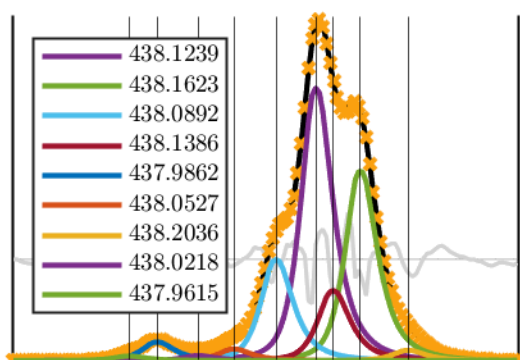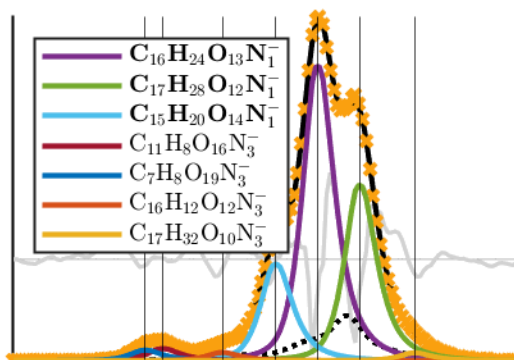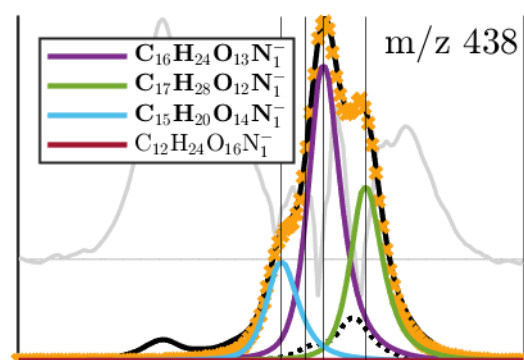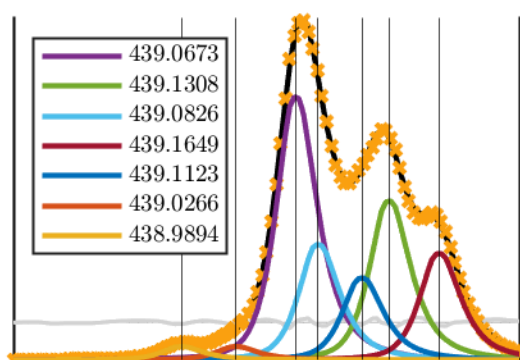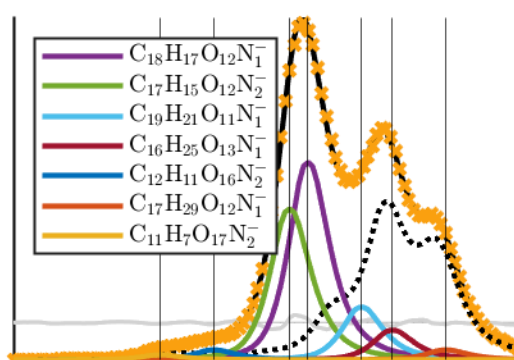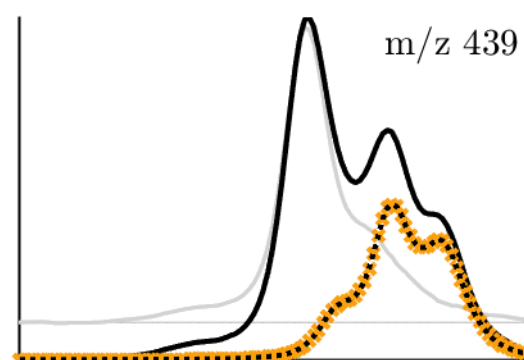



Free fit

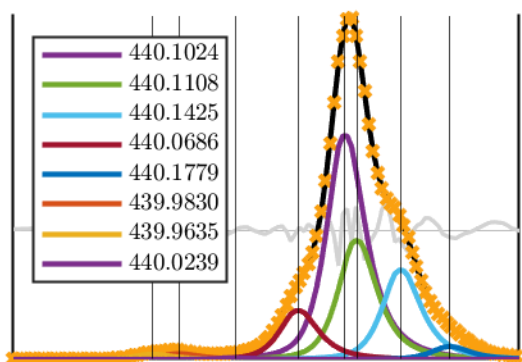

Final fit

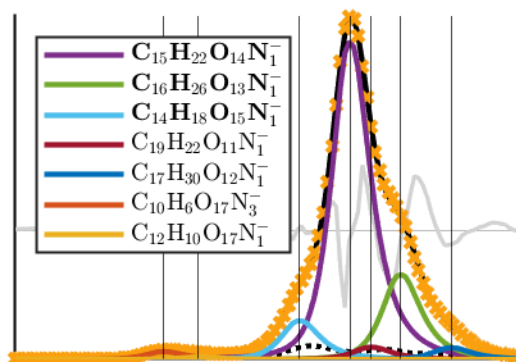

Manual fit

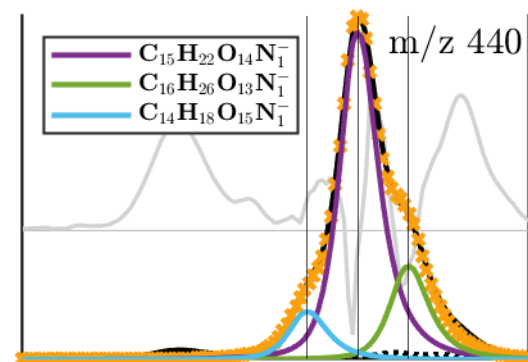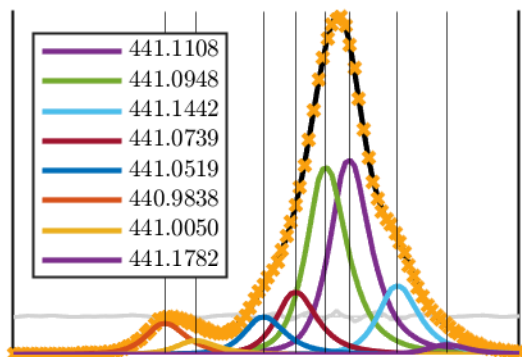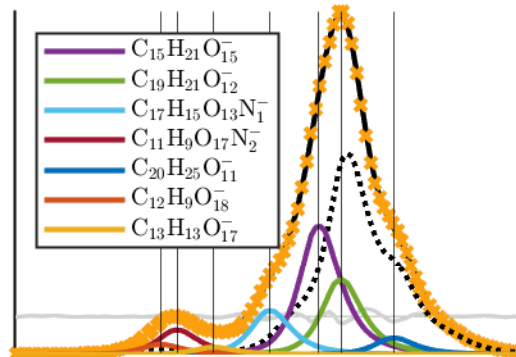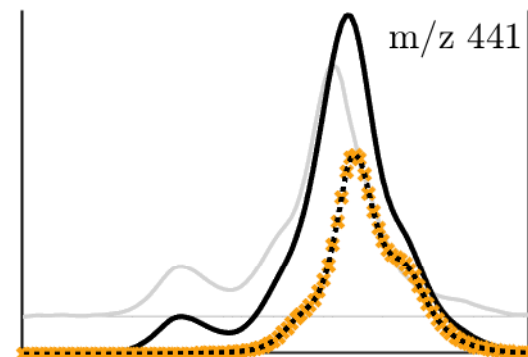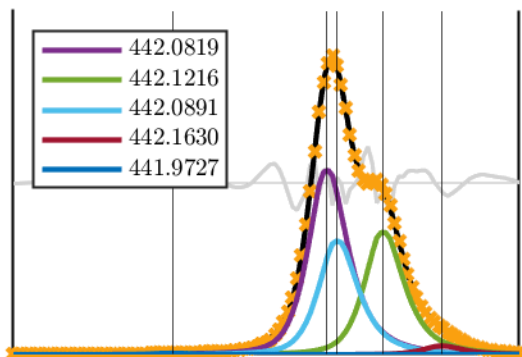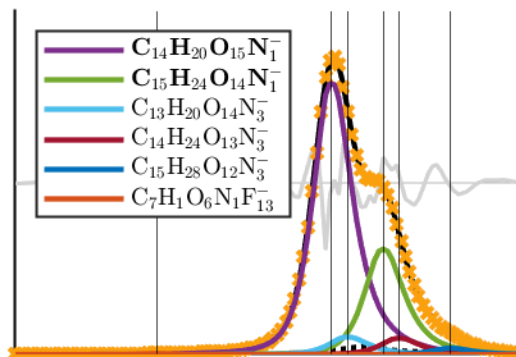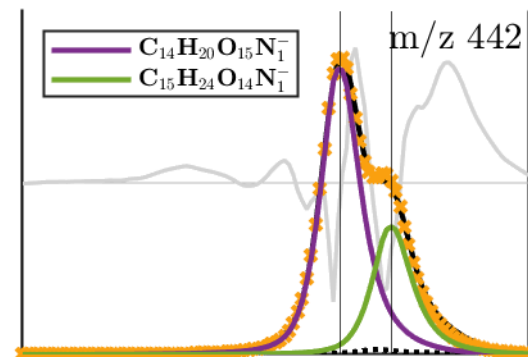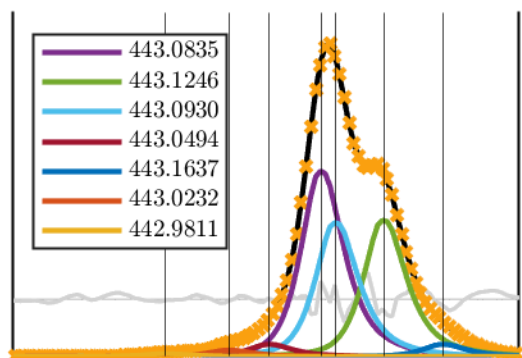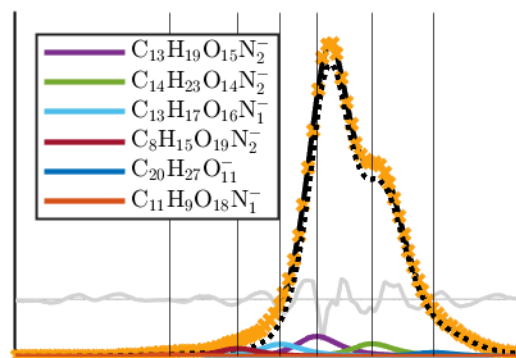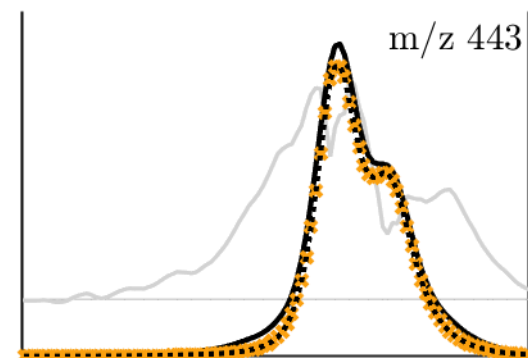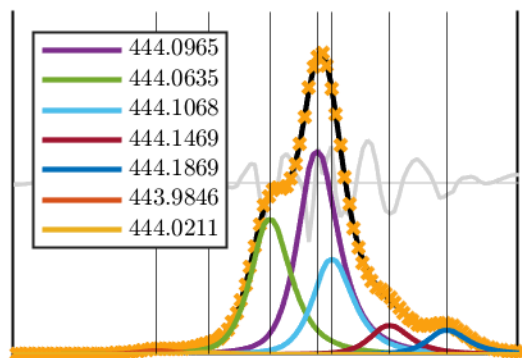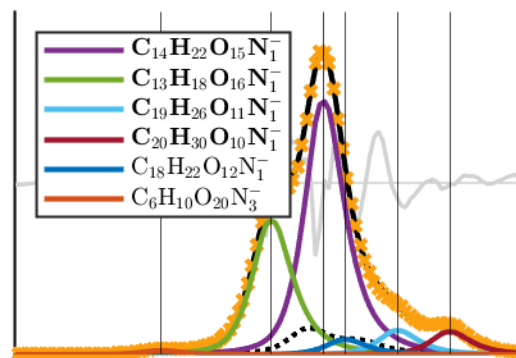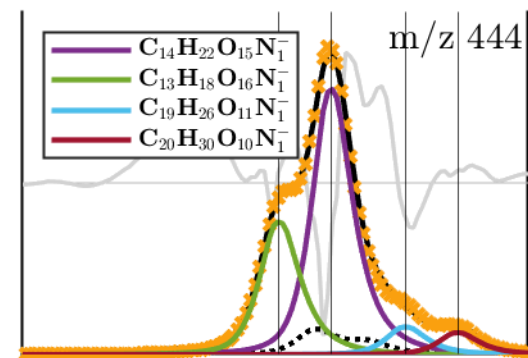

Free fit

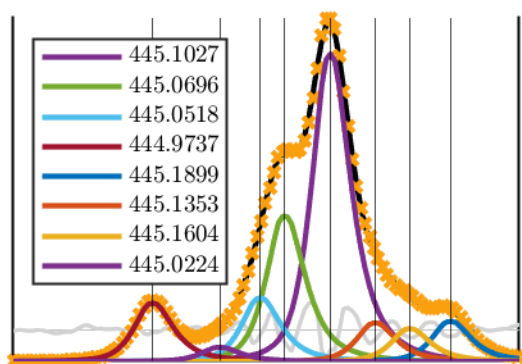

Final fit

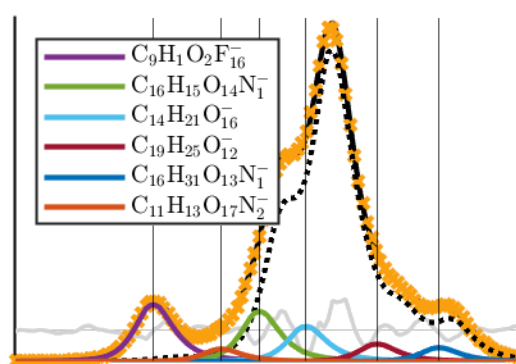

Manual fit

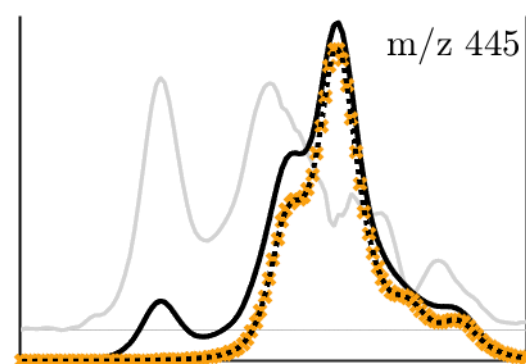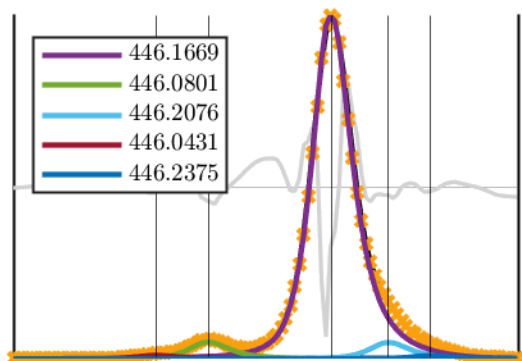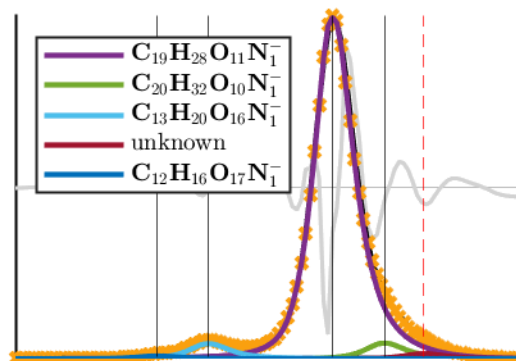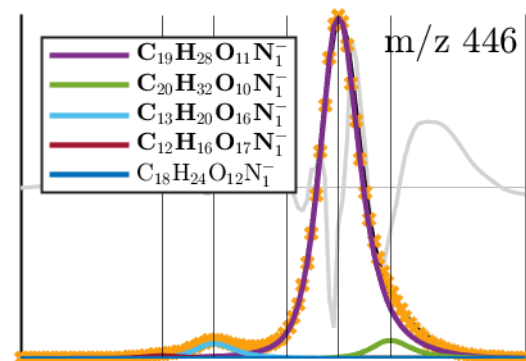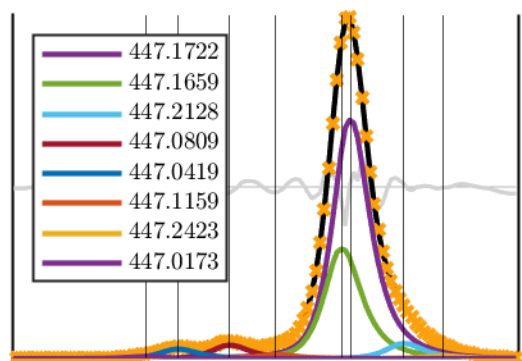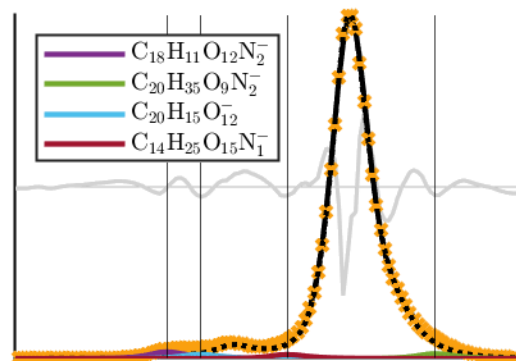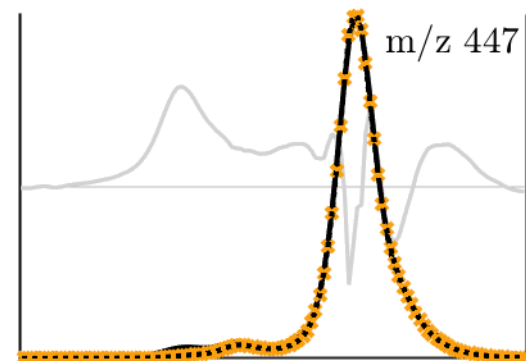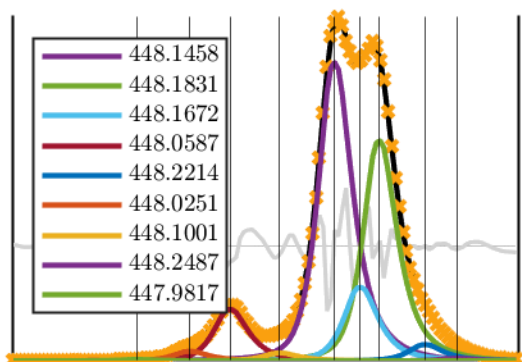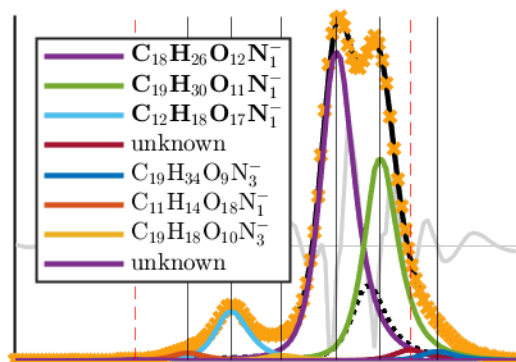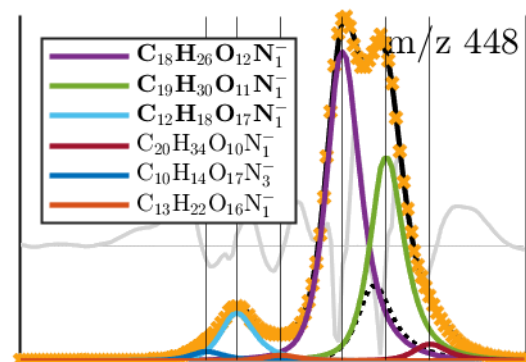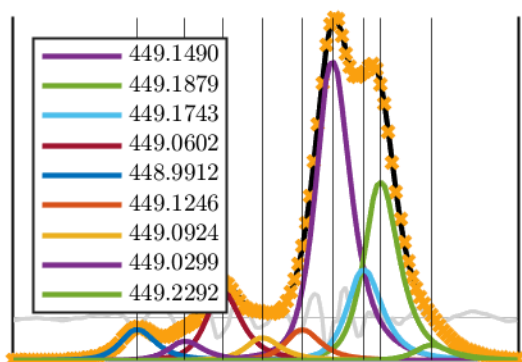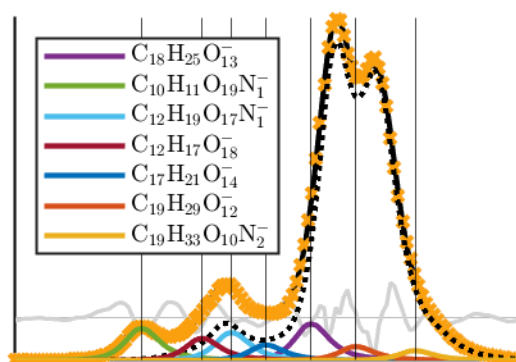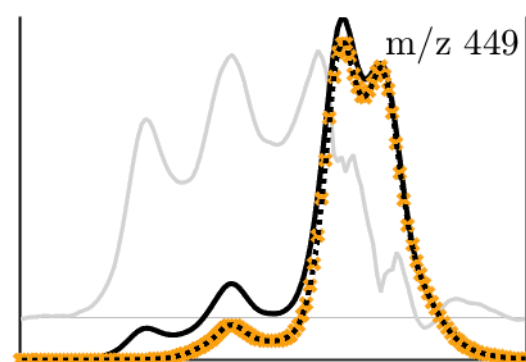

Free fit

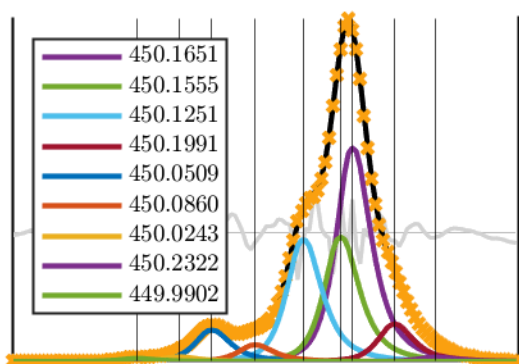

Final fit

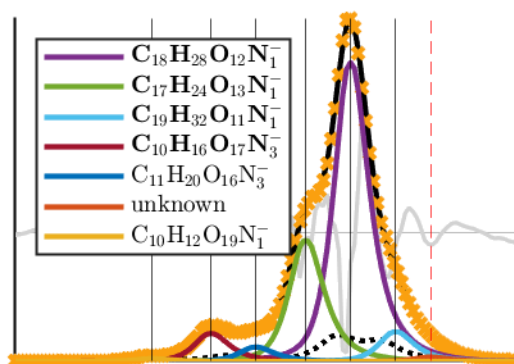

Manual fit

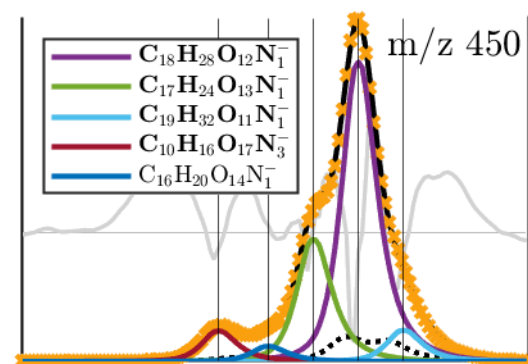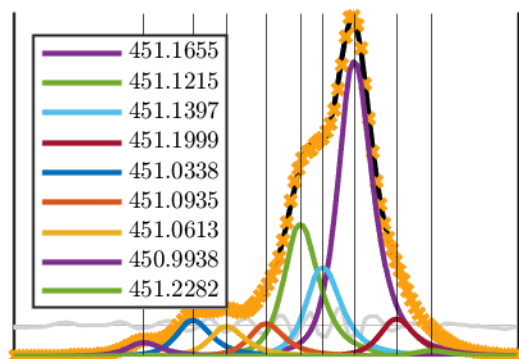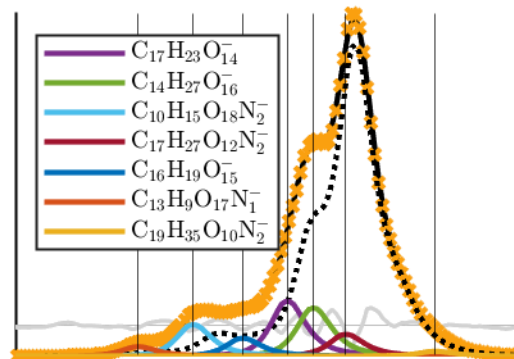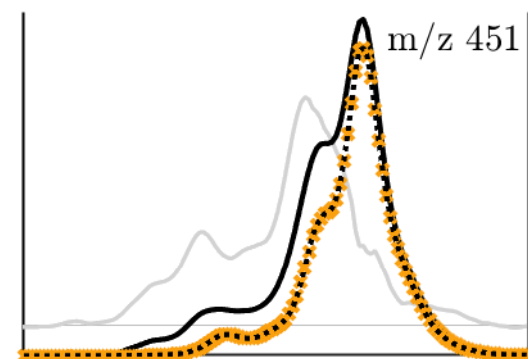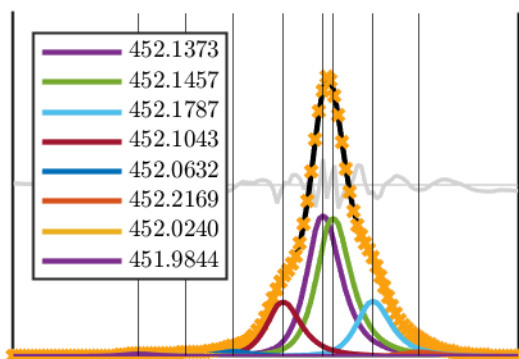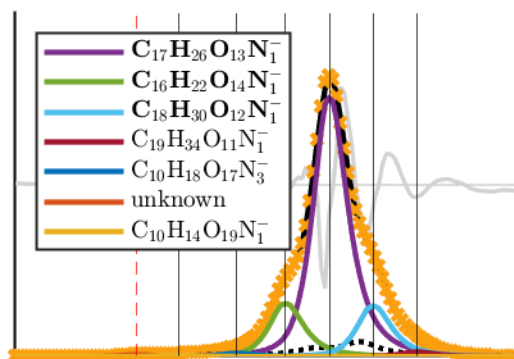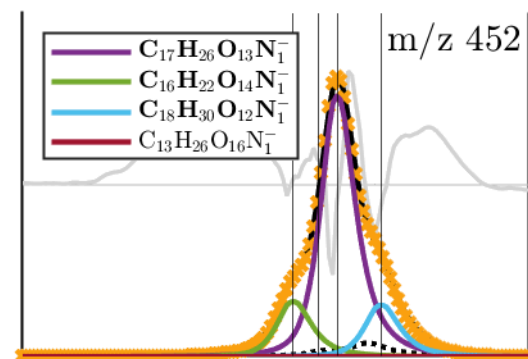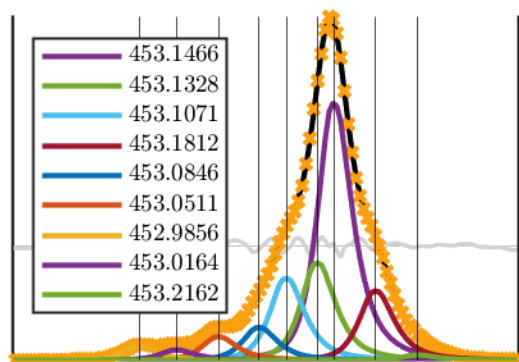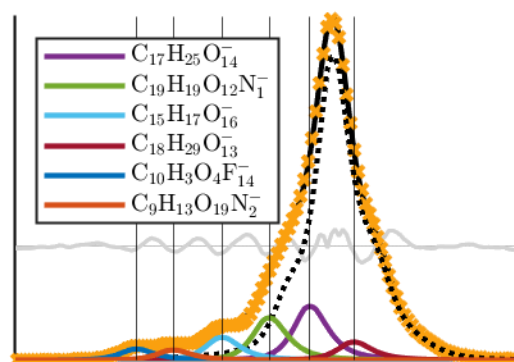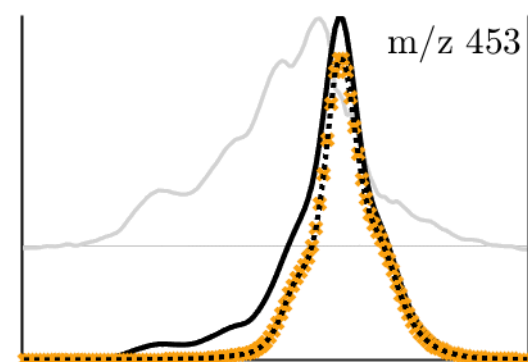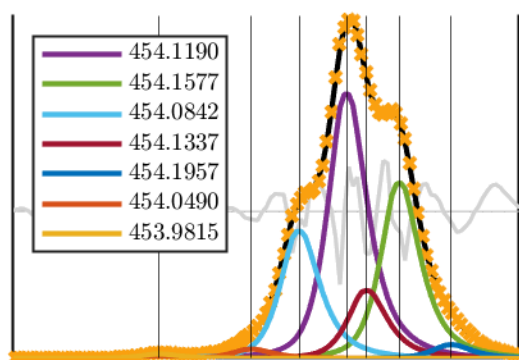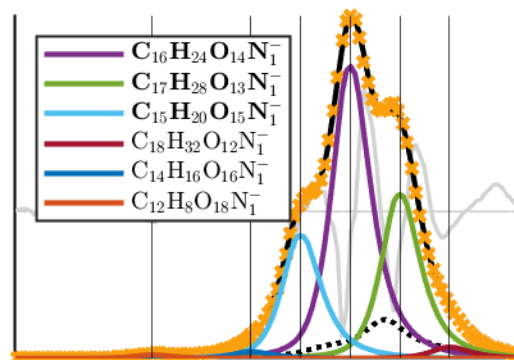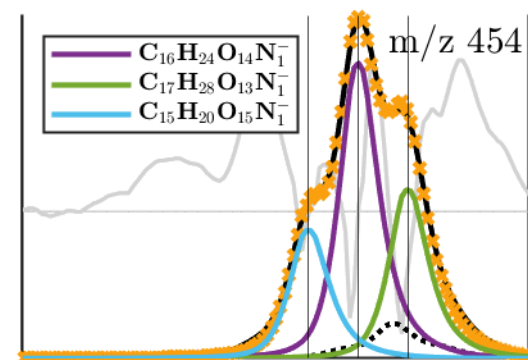



Free fit

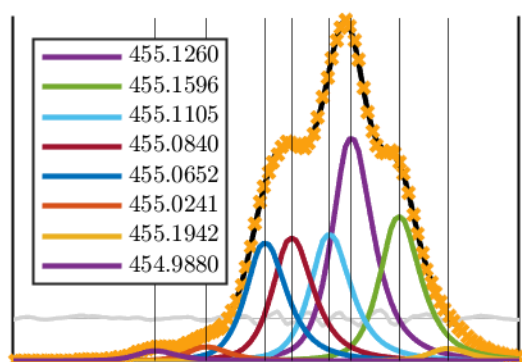

Final fit

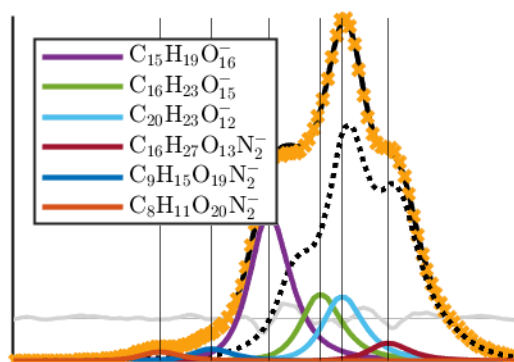

Manual fit

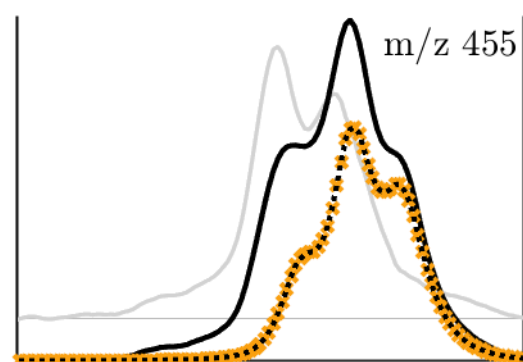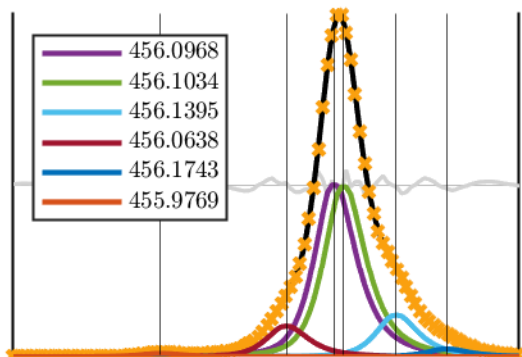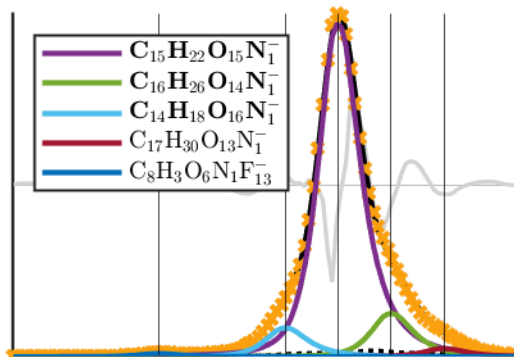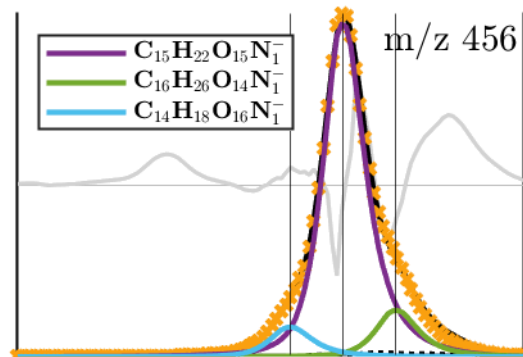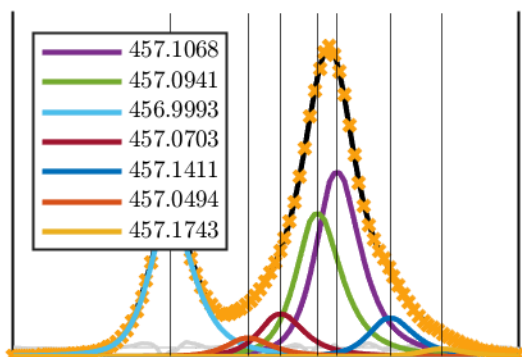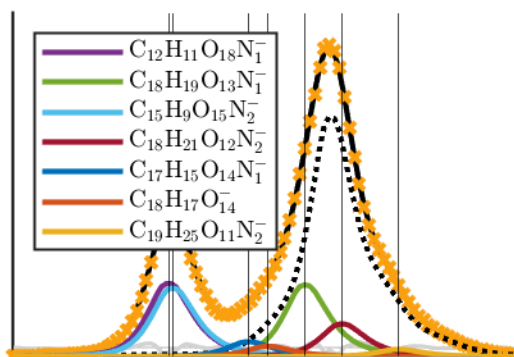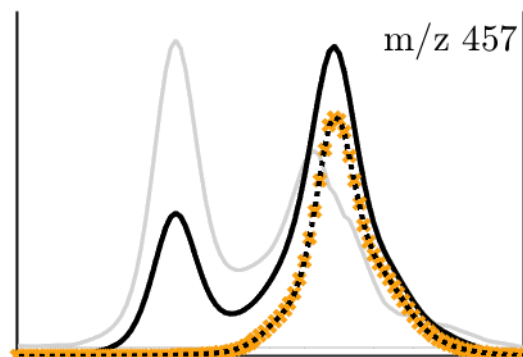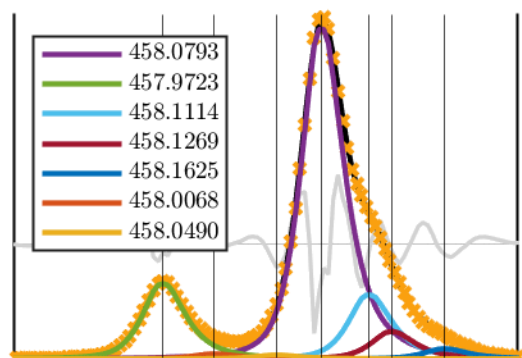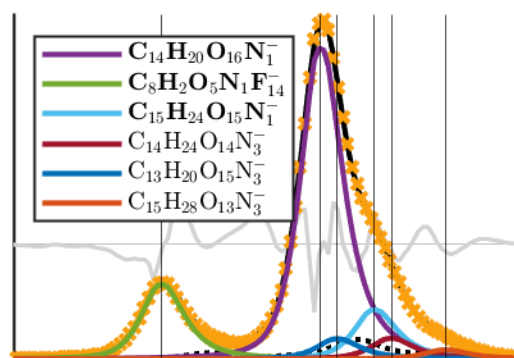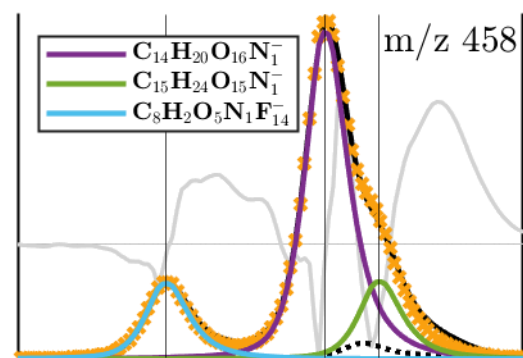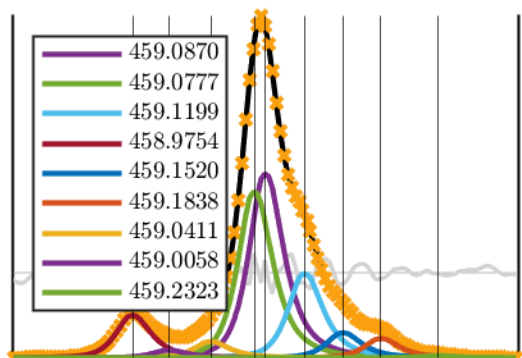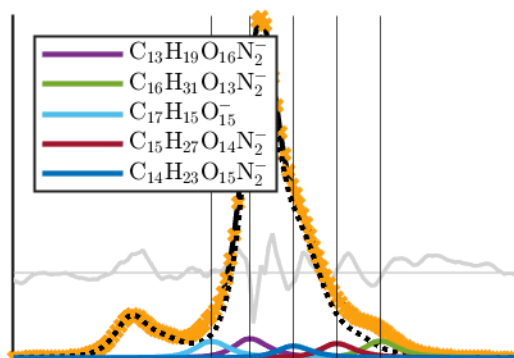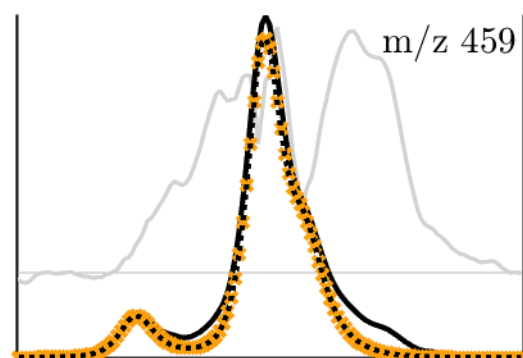



Free fit

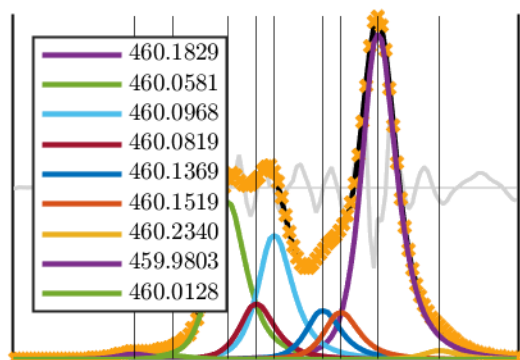

Final fit

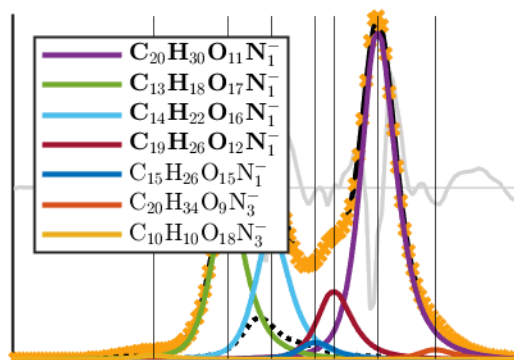

Manual fit

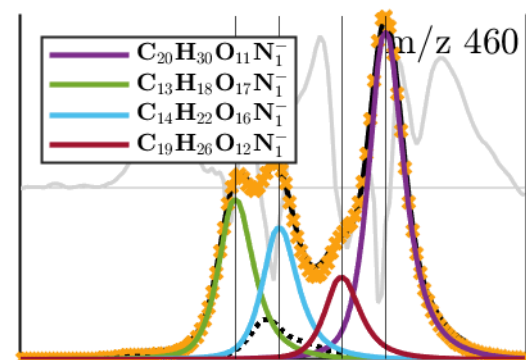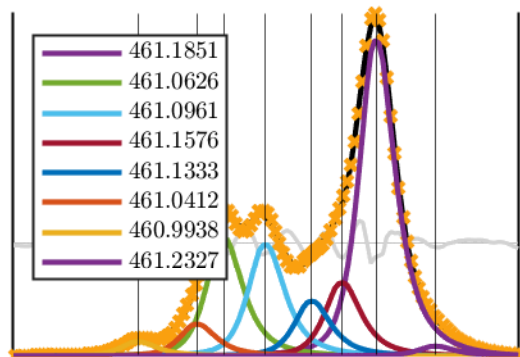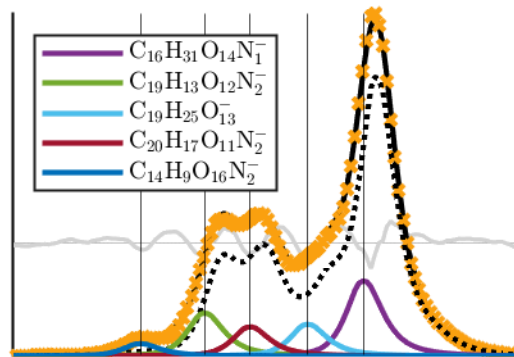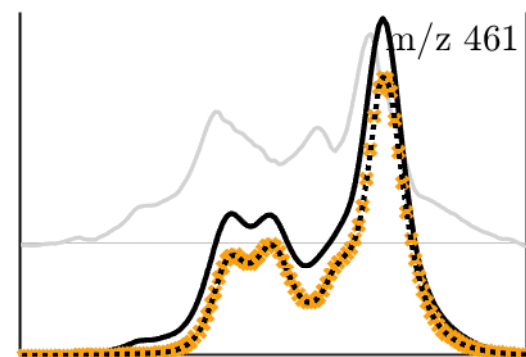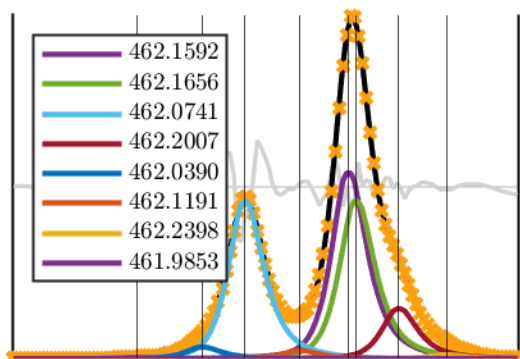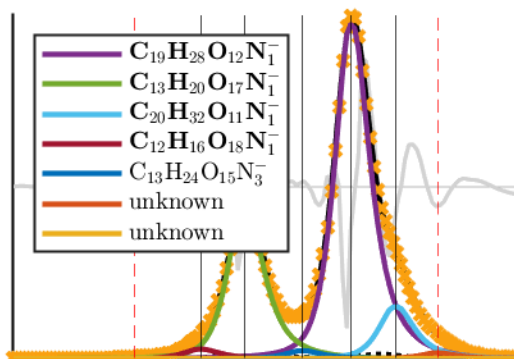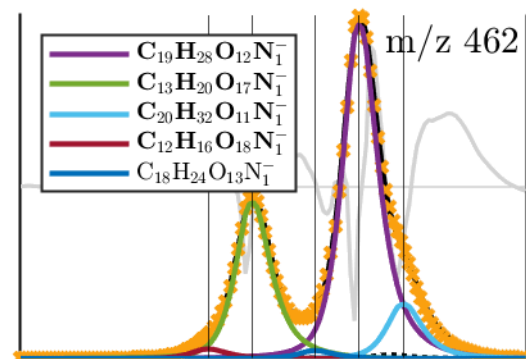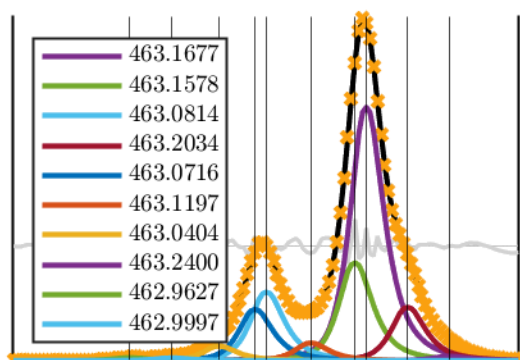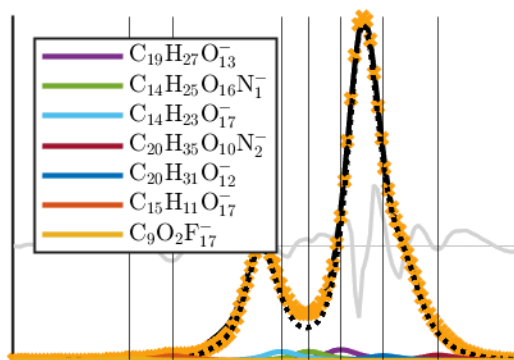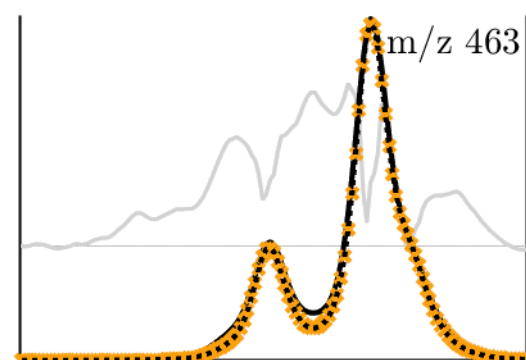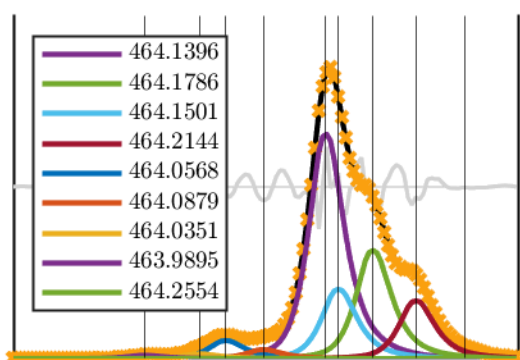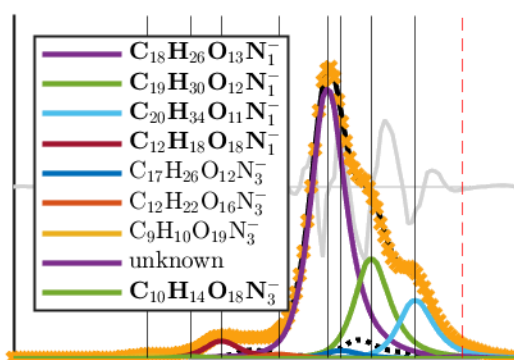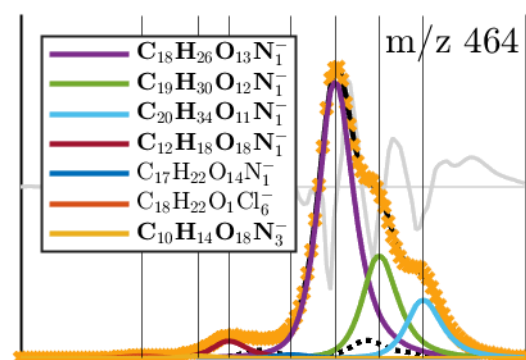

Free fit

Final fit

Manual fit

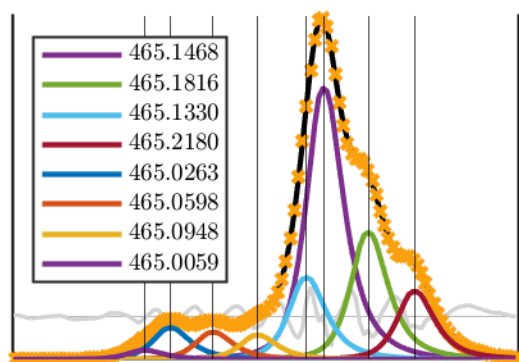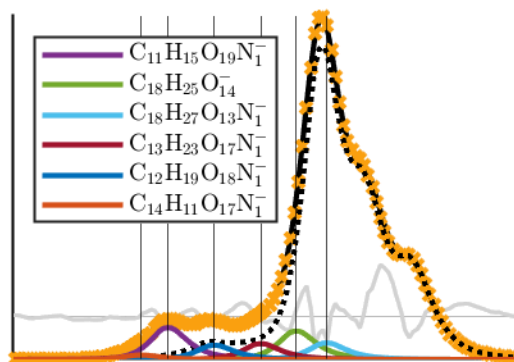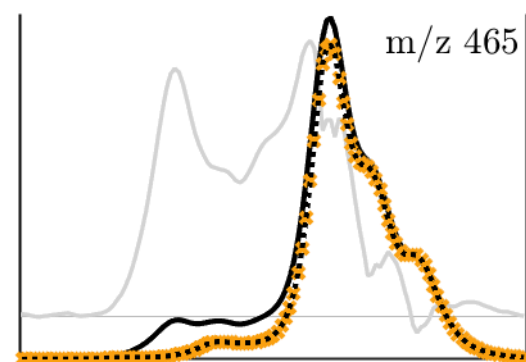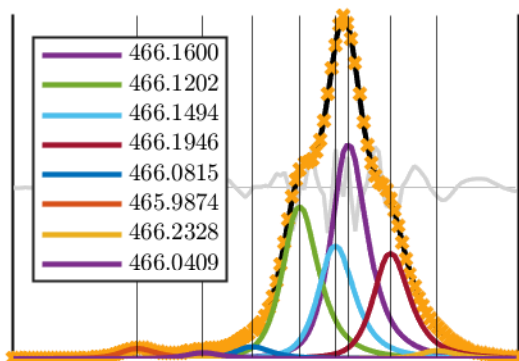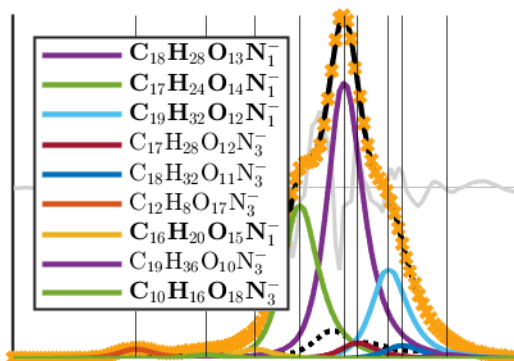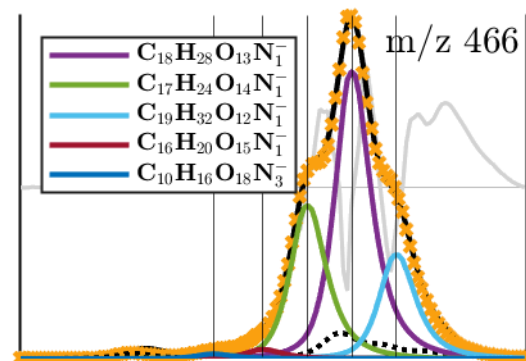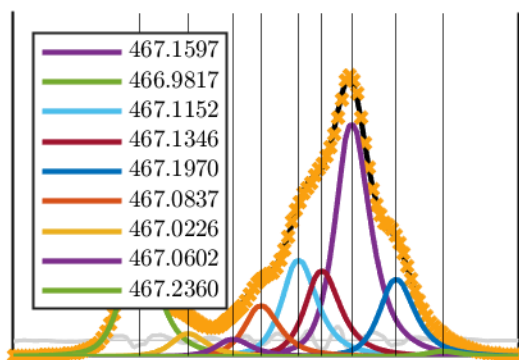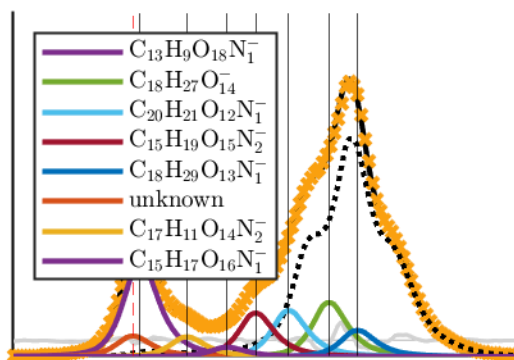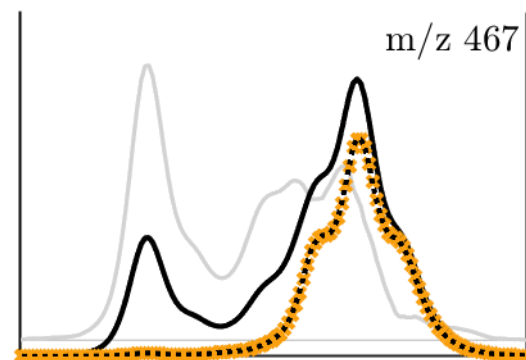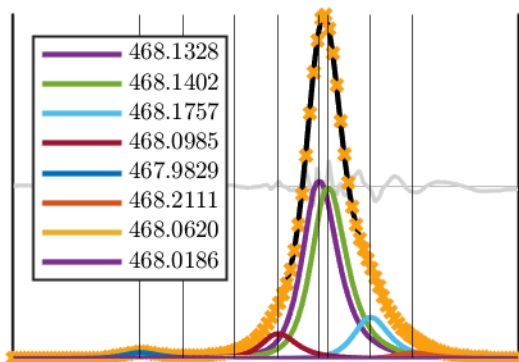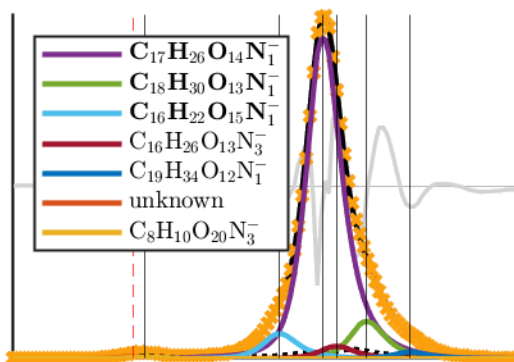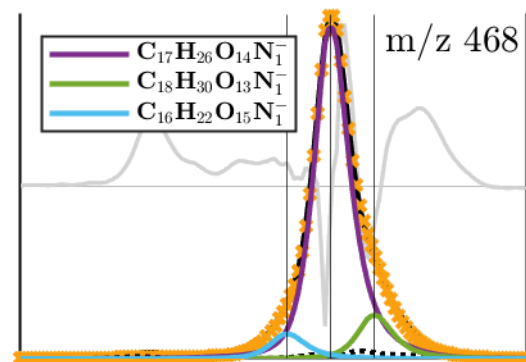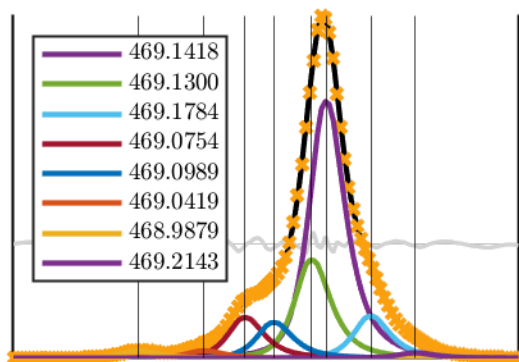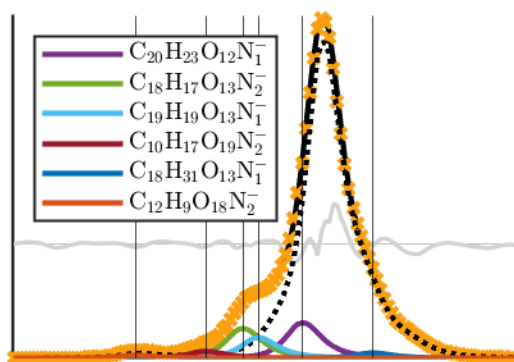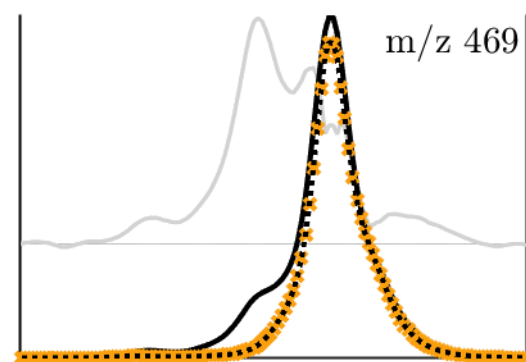

Free fit

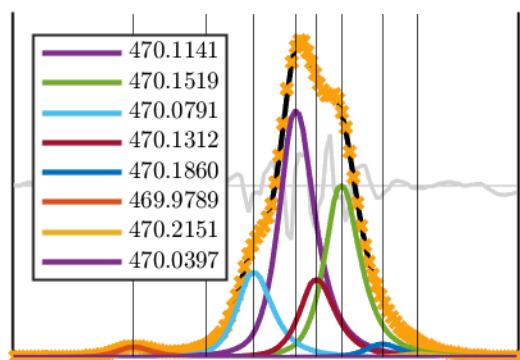

Final fit

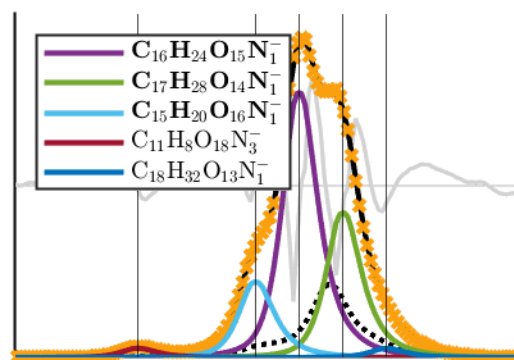

Manual fit

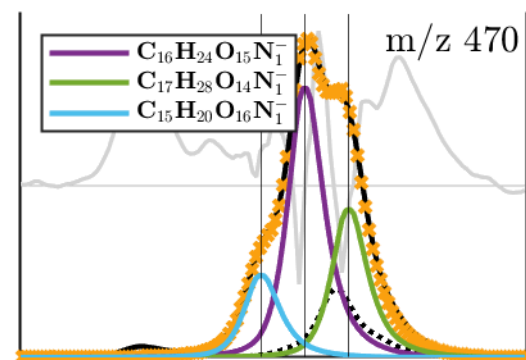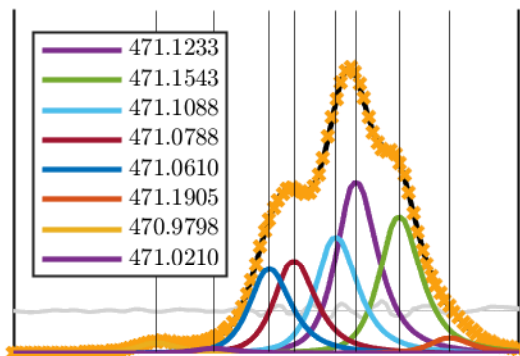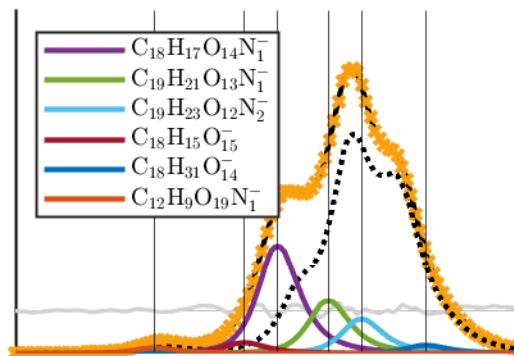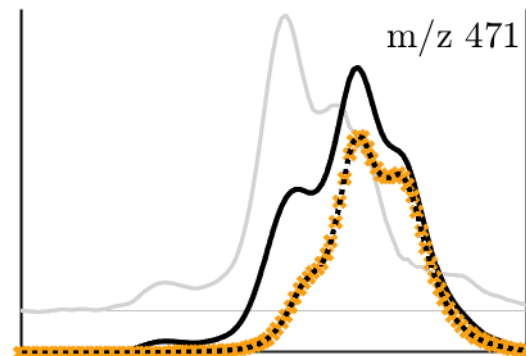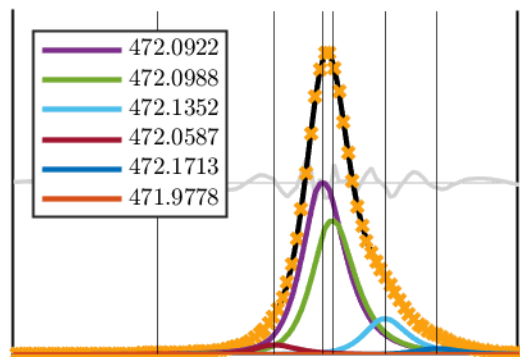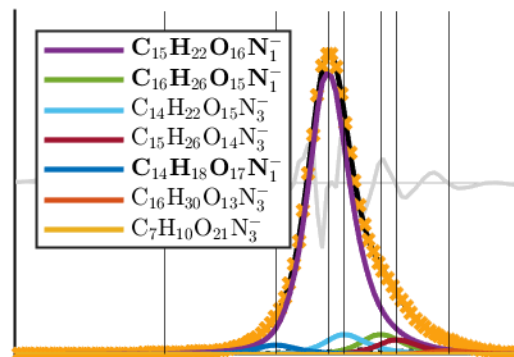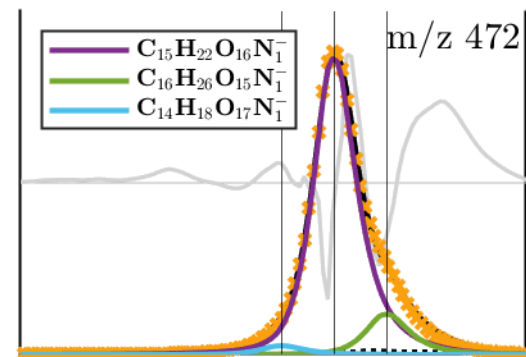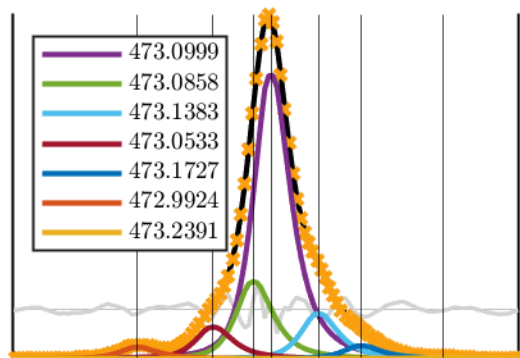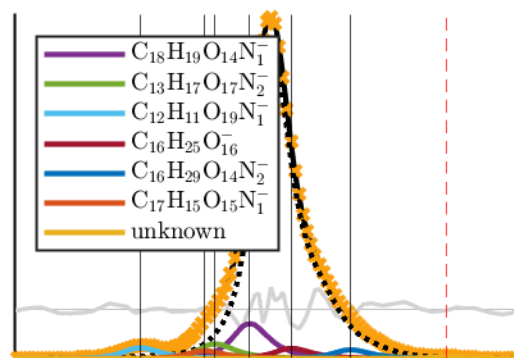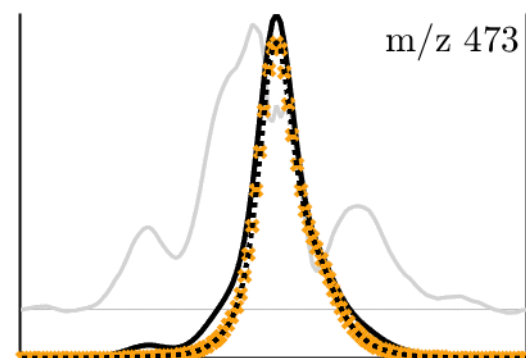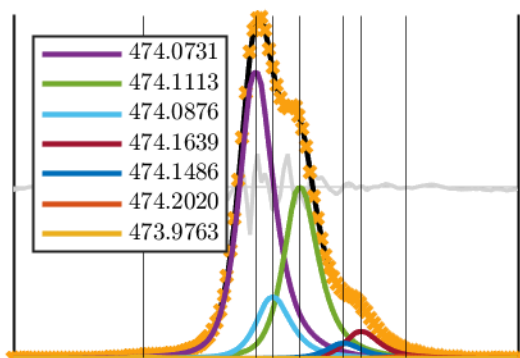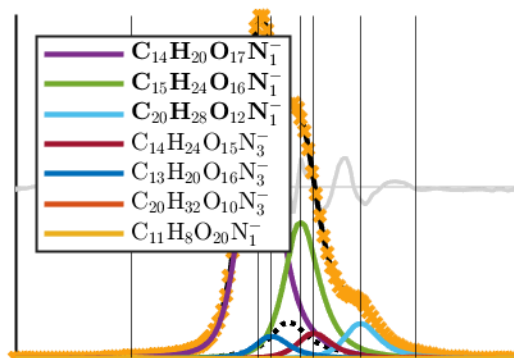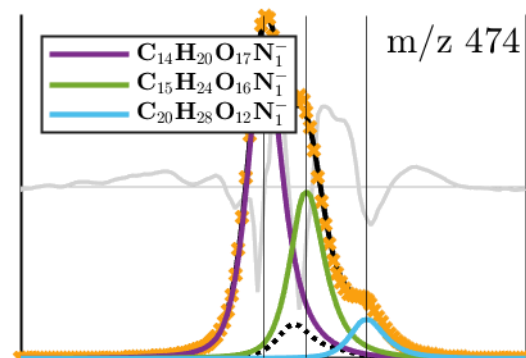



Free fit

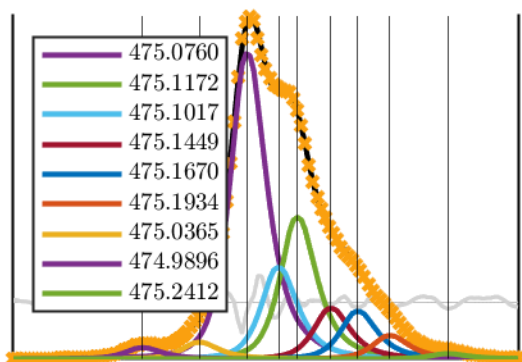

Final fit

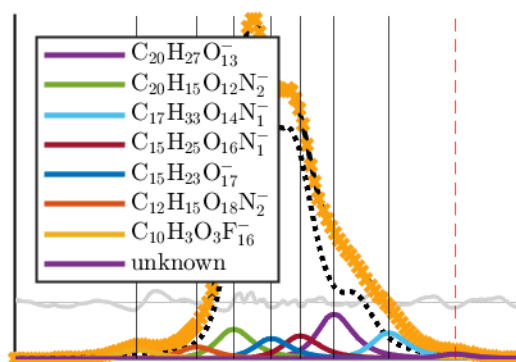

Manual fit

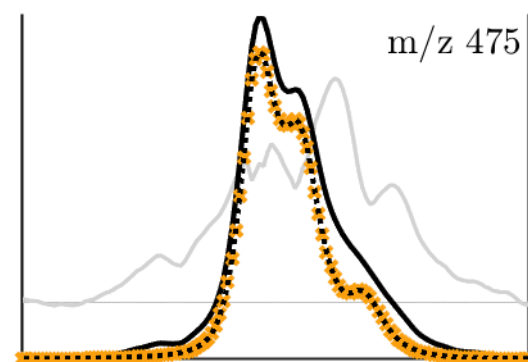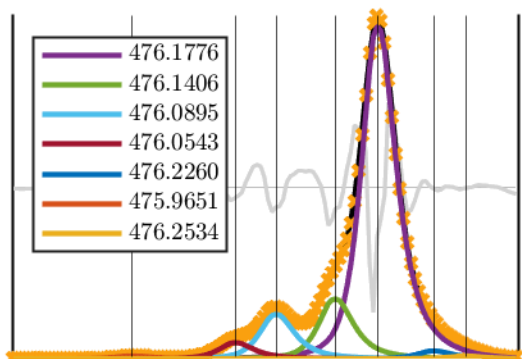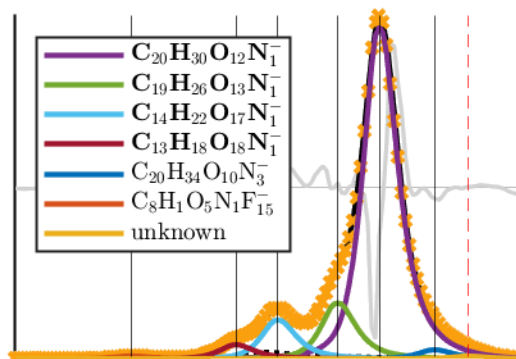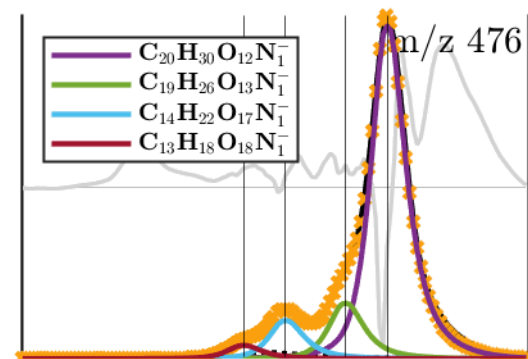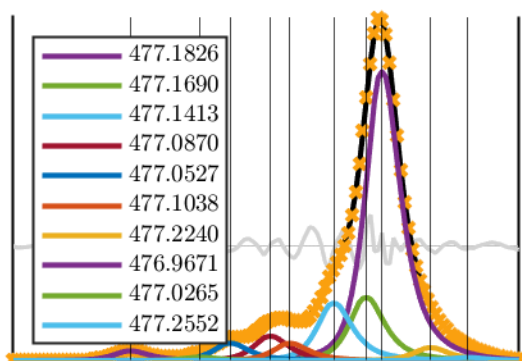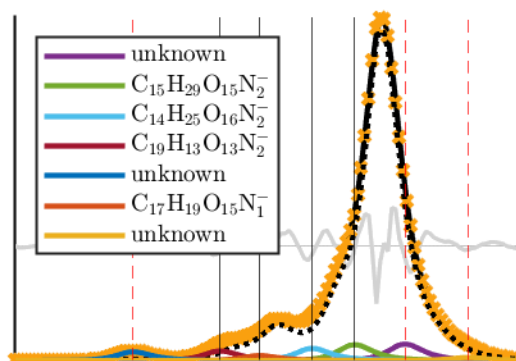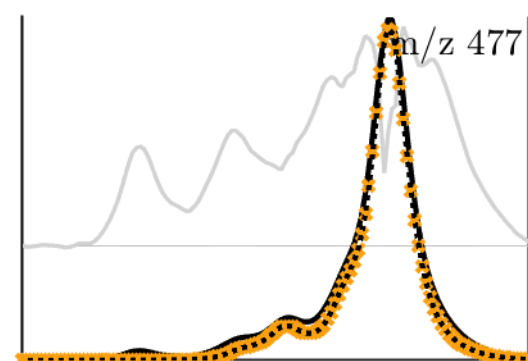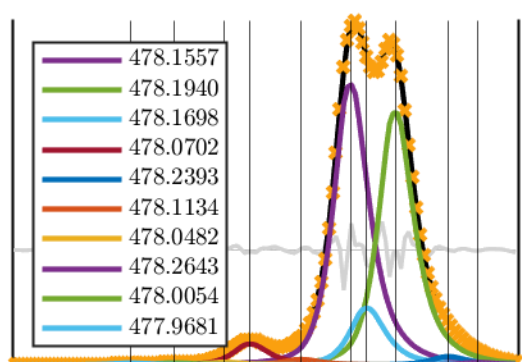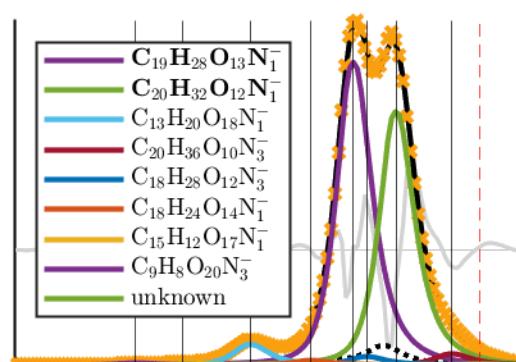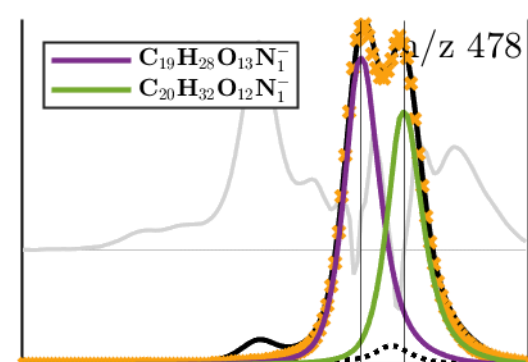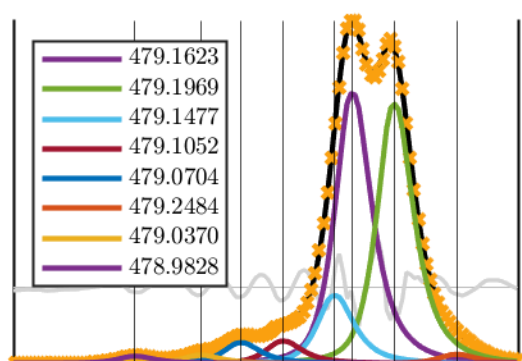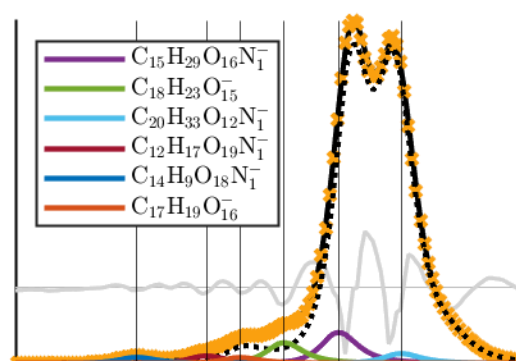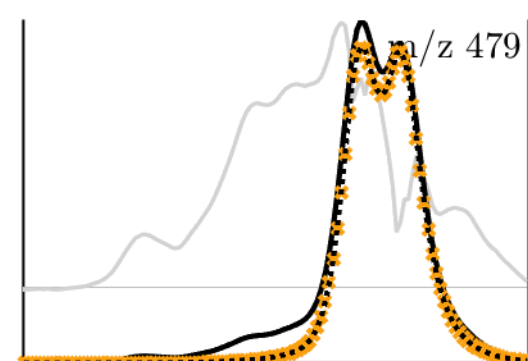

Free fit

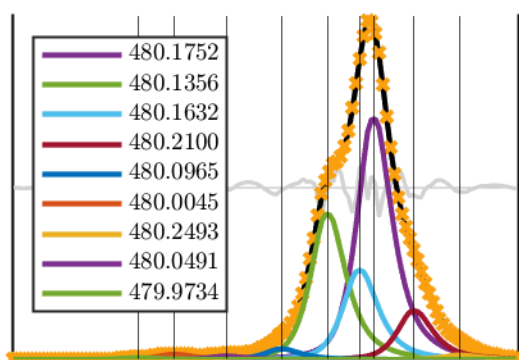

Final fit

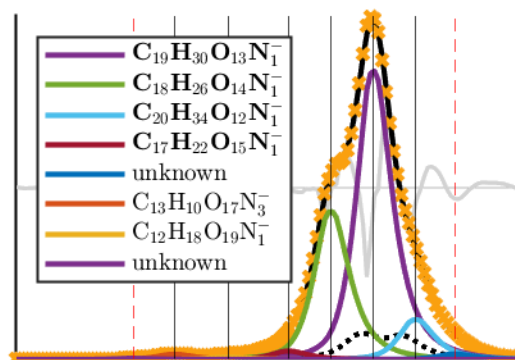

Manual fit

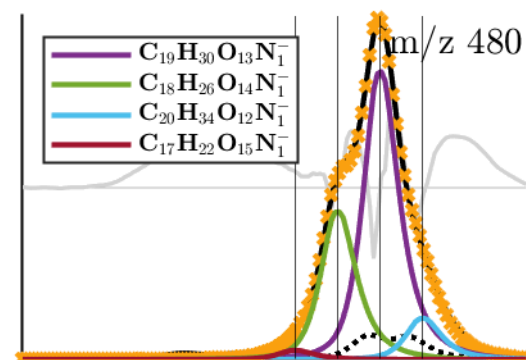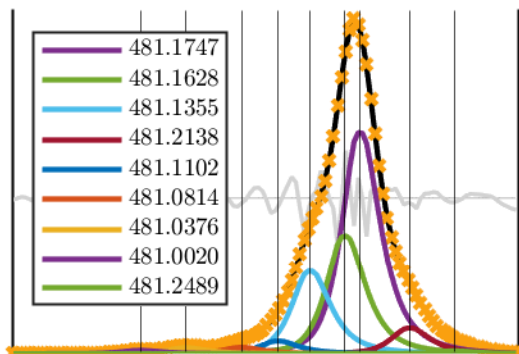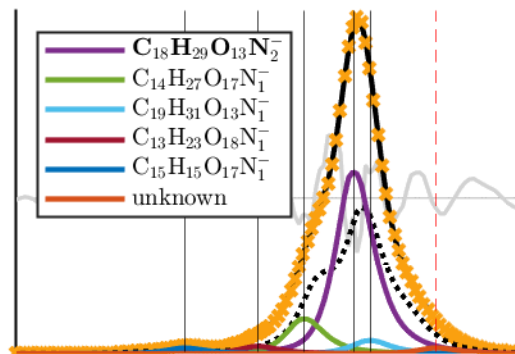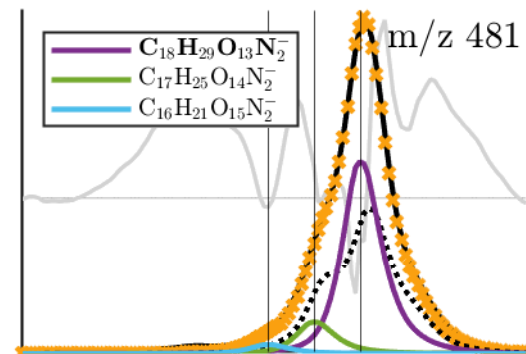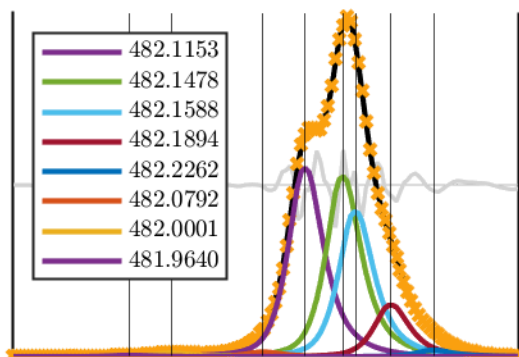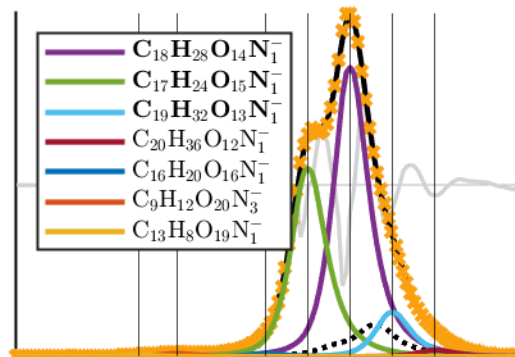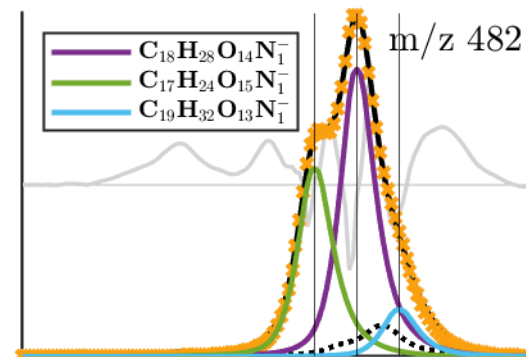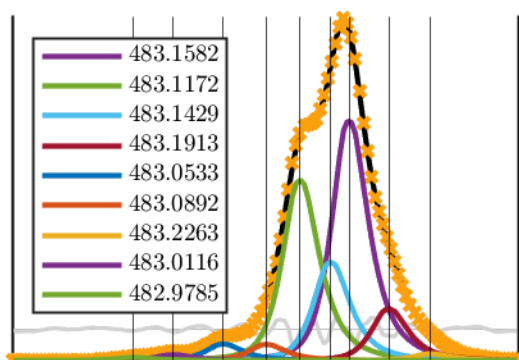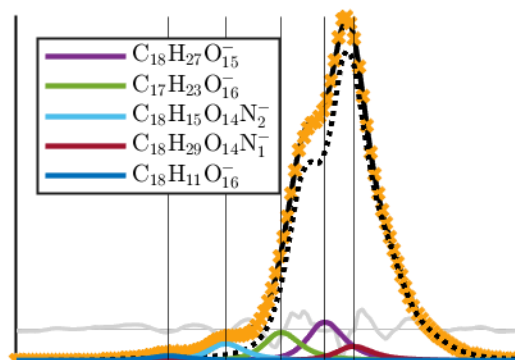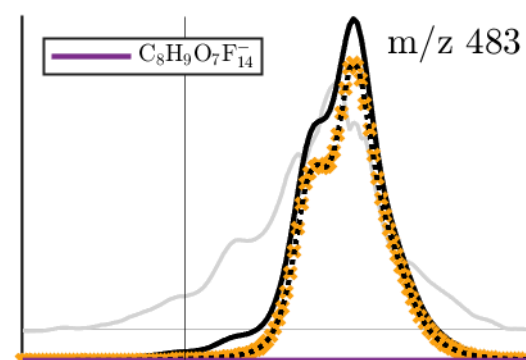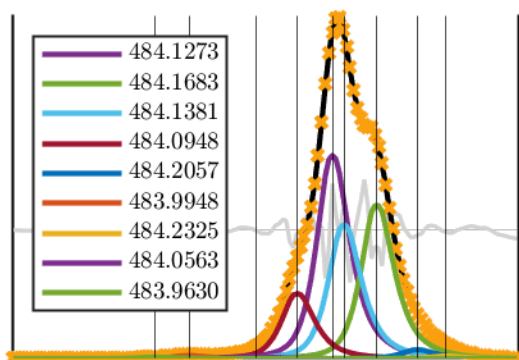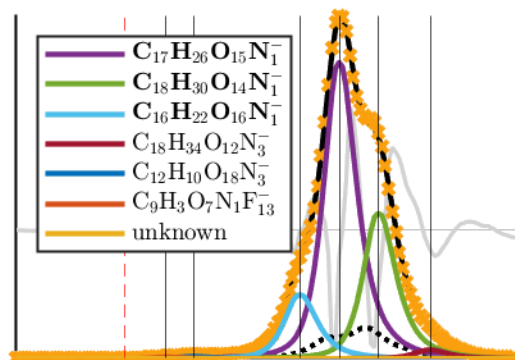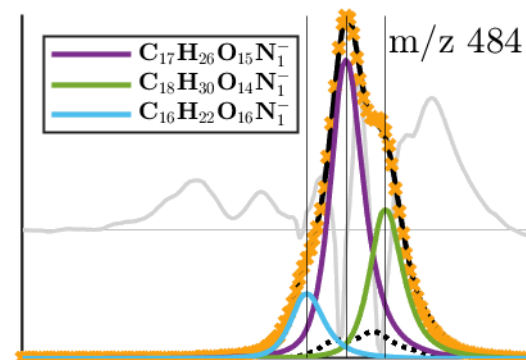

Free fit

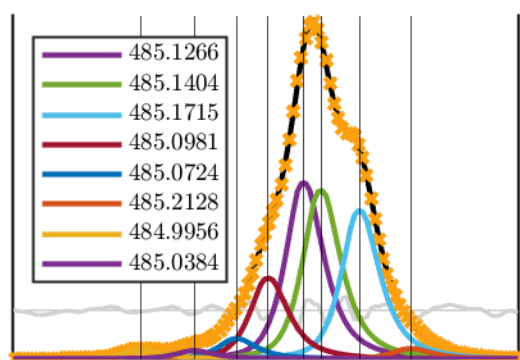

Final fit

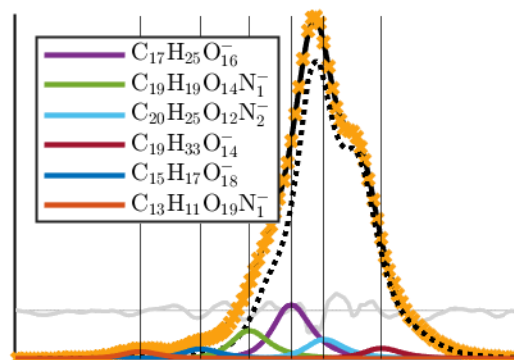

Manual fit

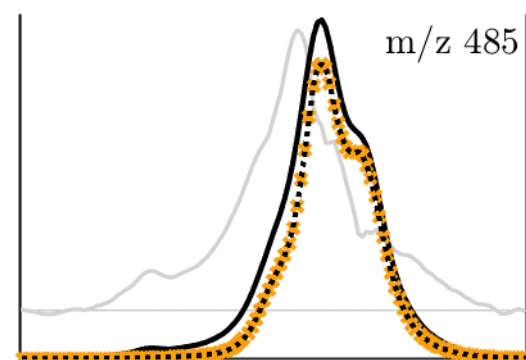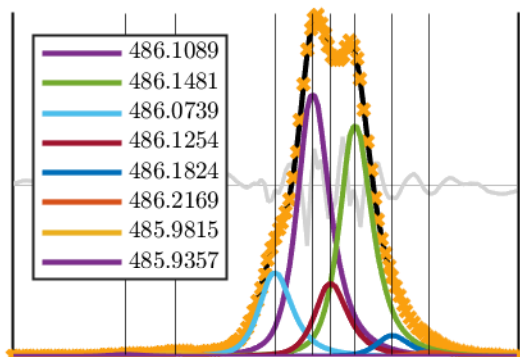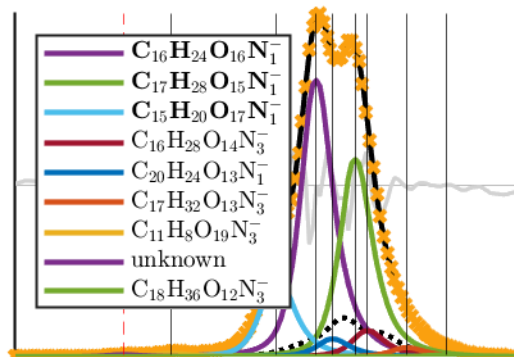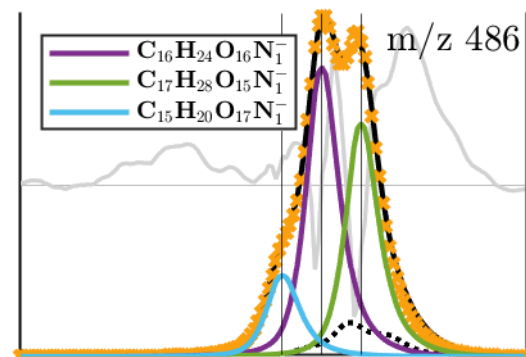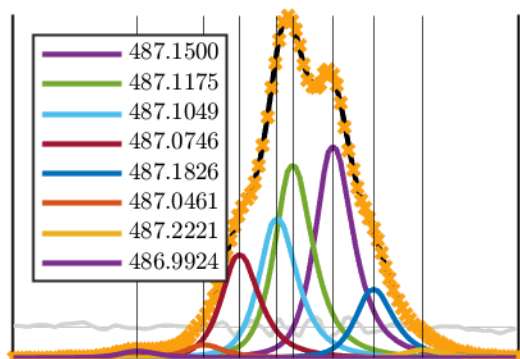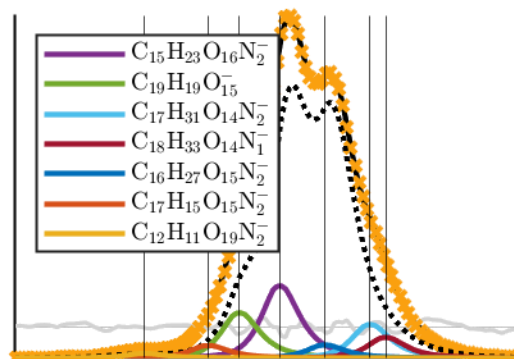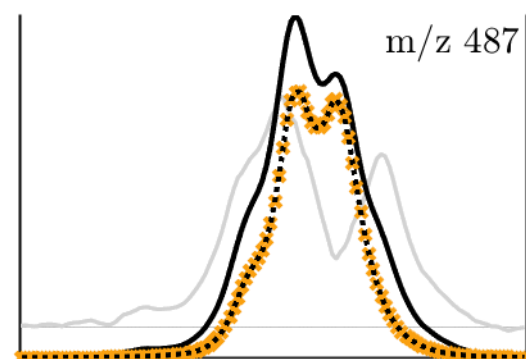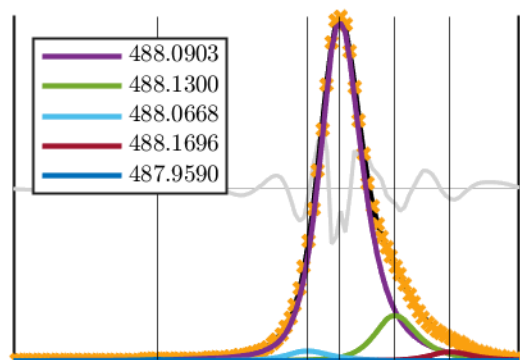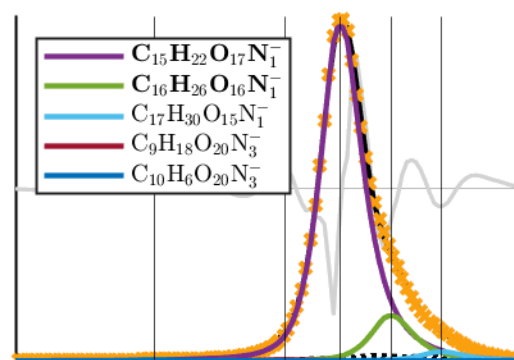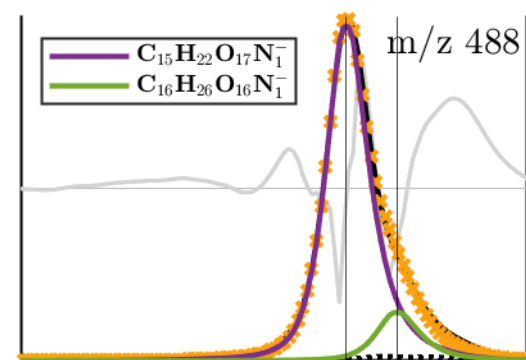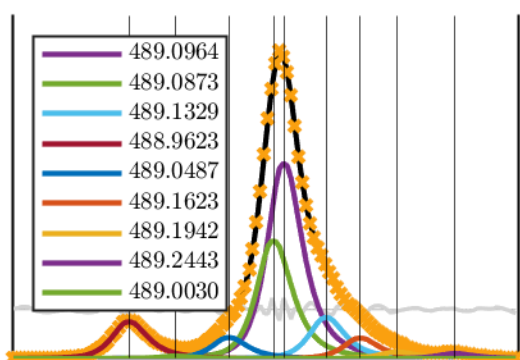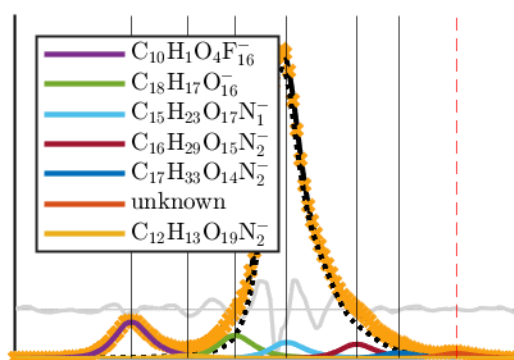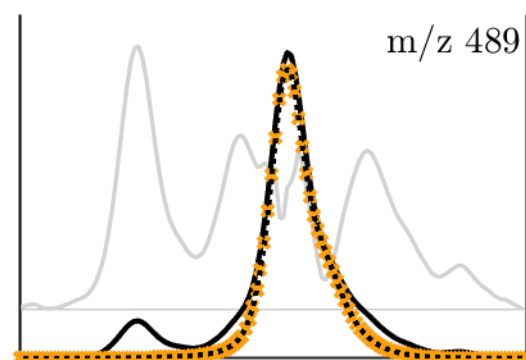



Free fit

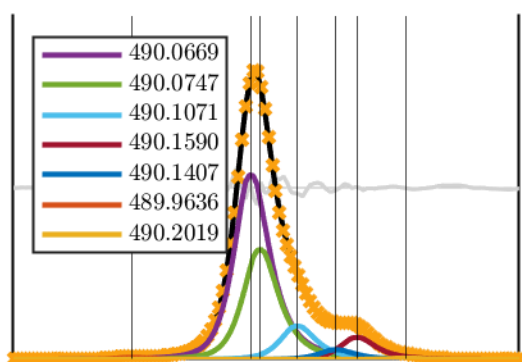

Final fit

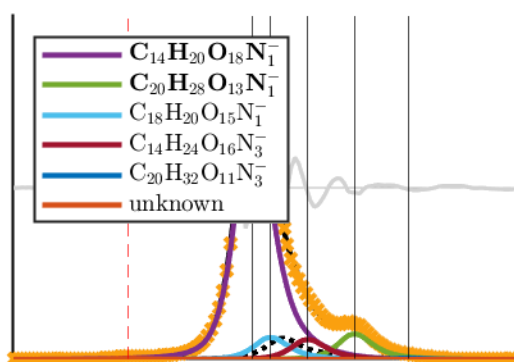

Manual fit

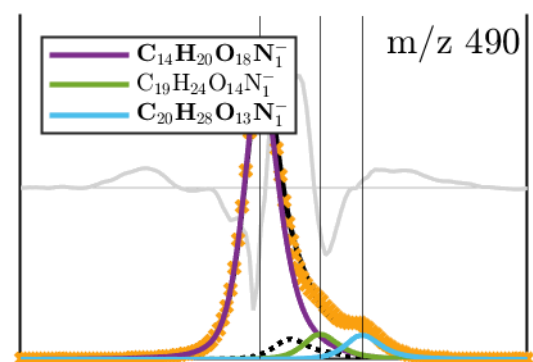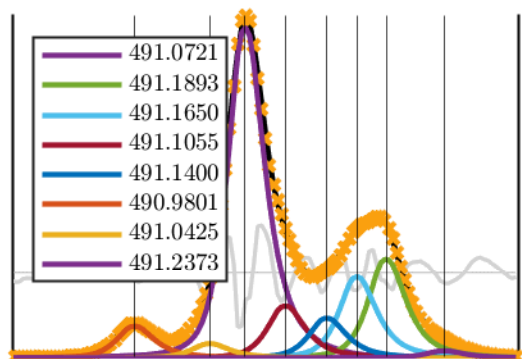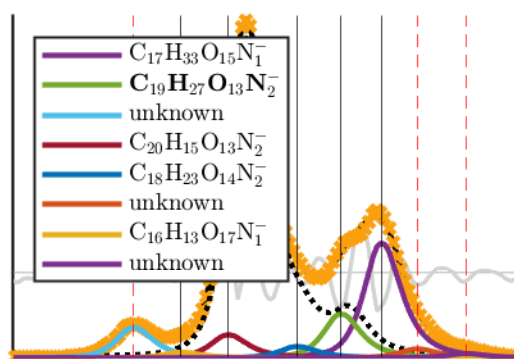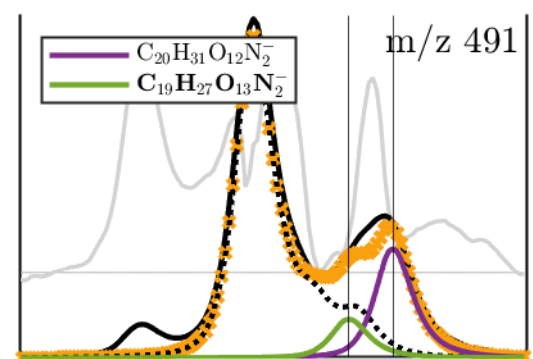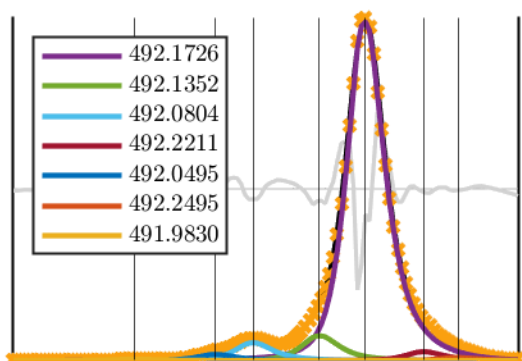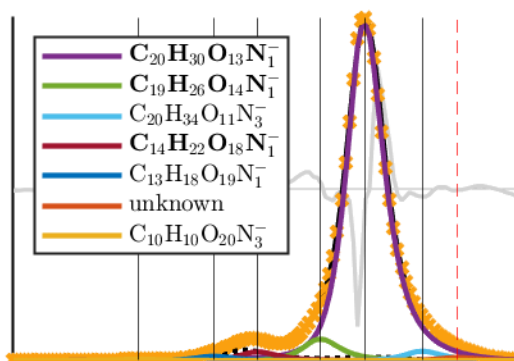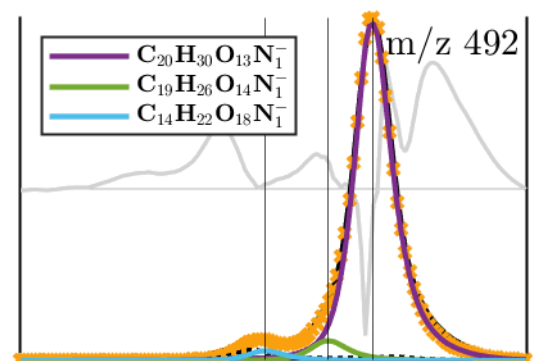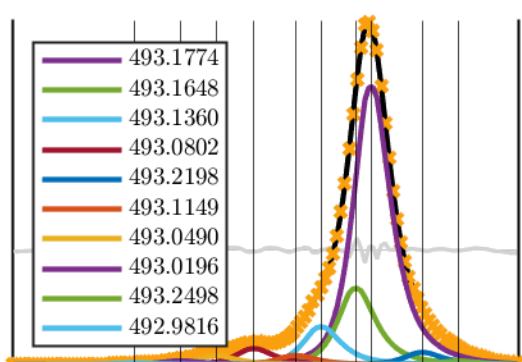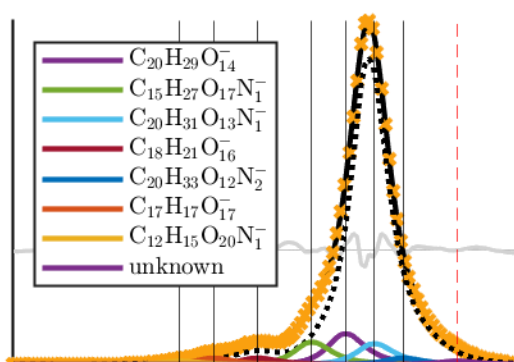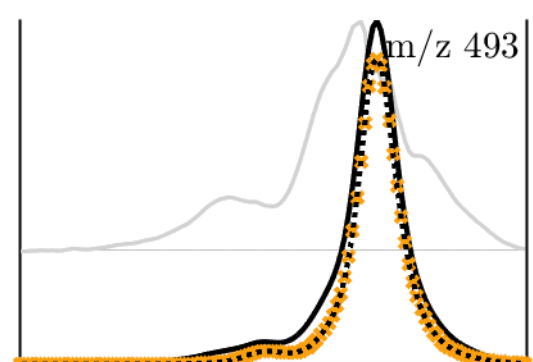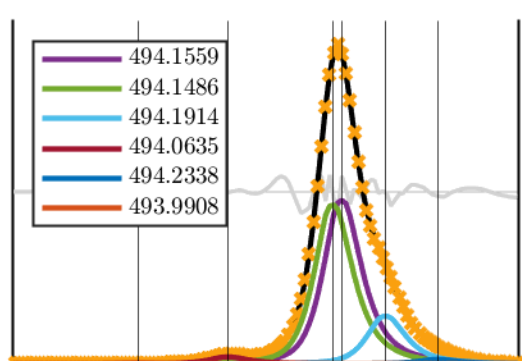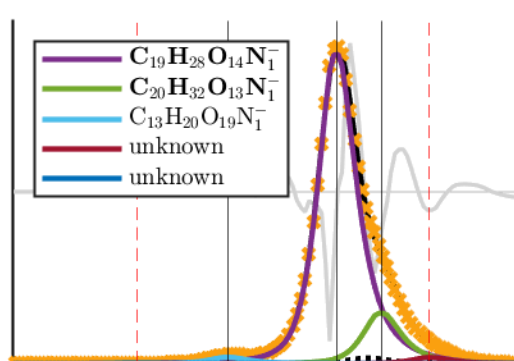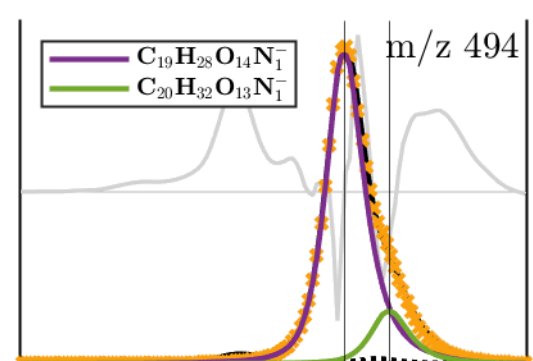

Free fit

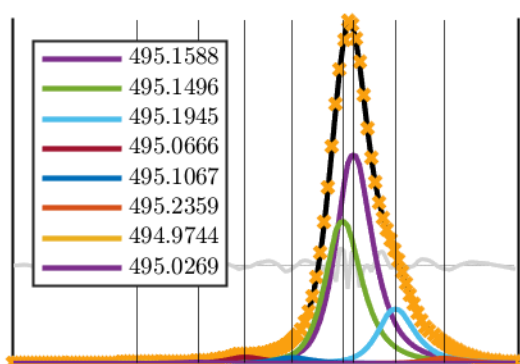

Final fit

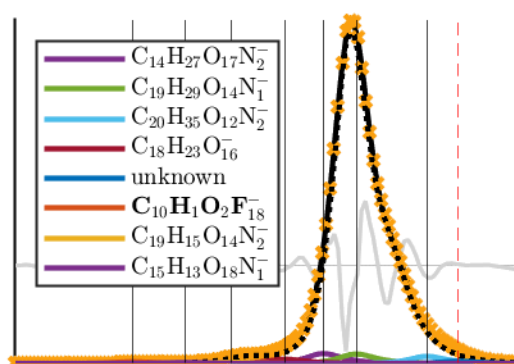

Manual fit

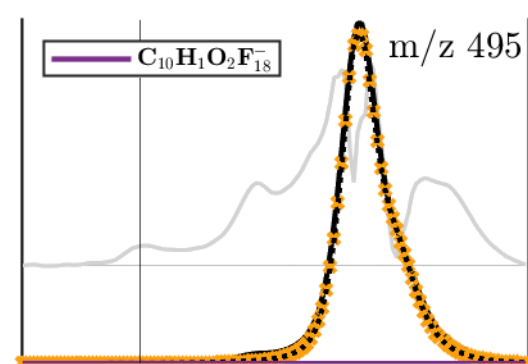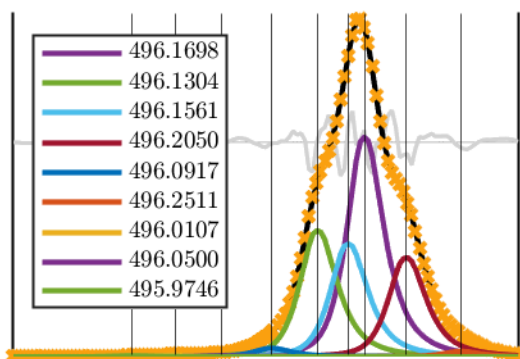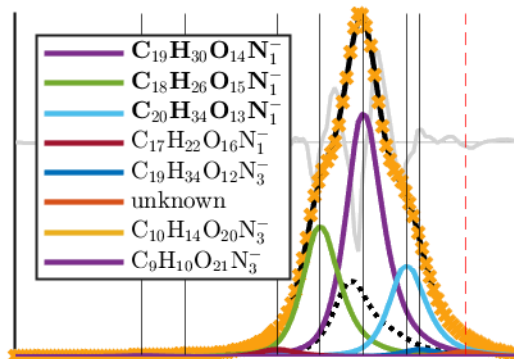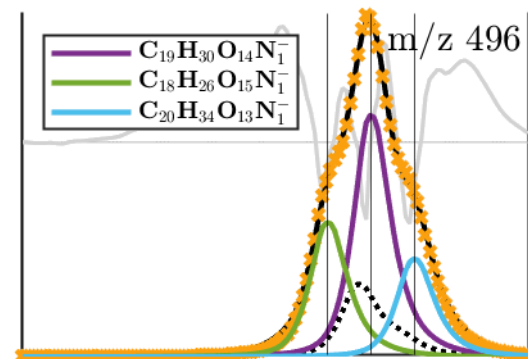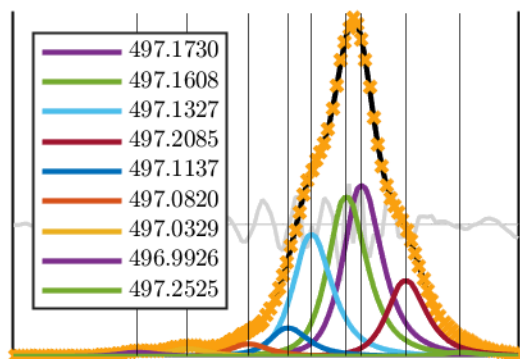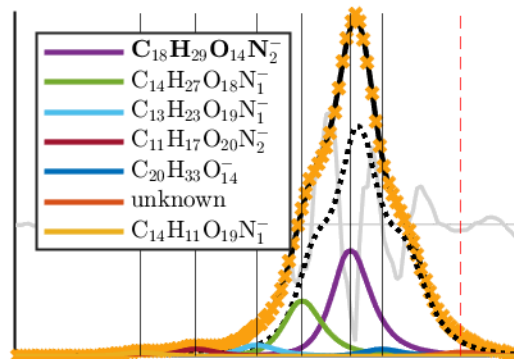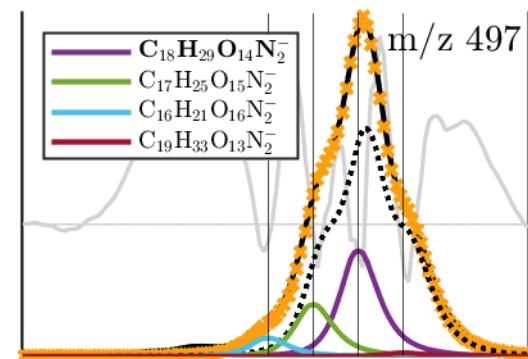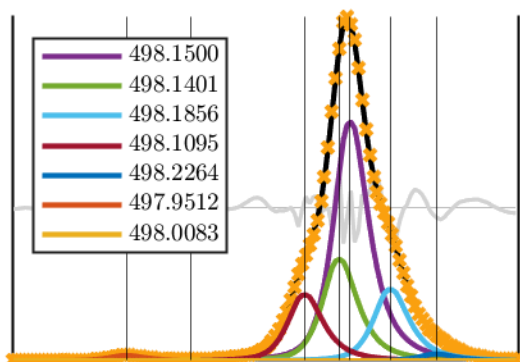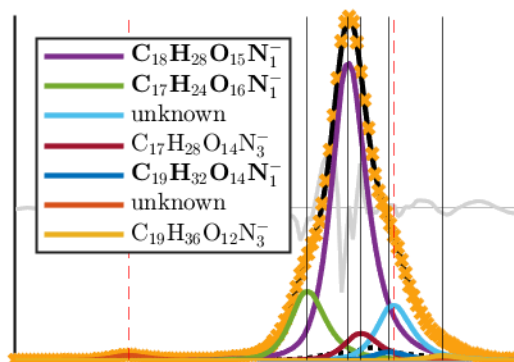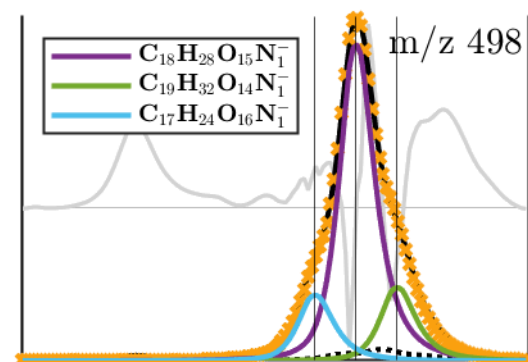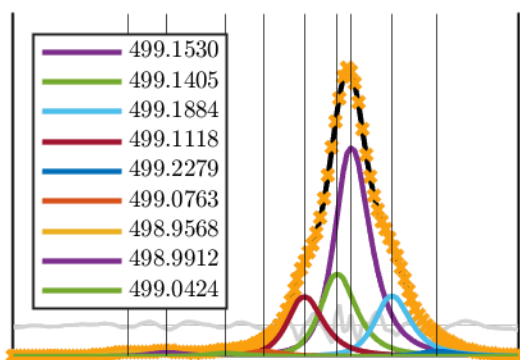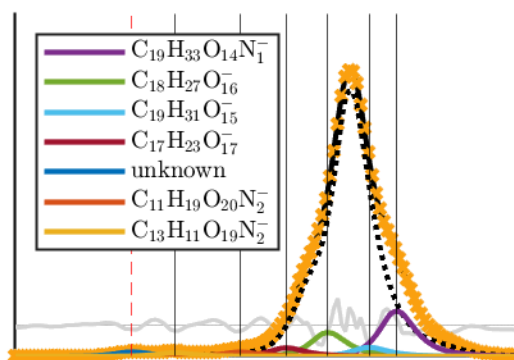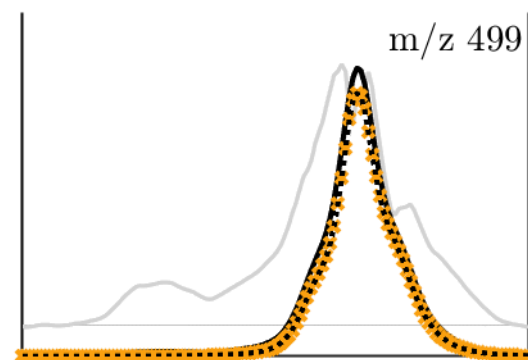

Free fit

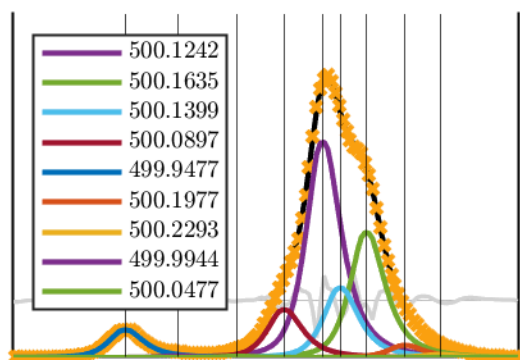

Final fit

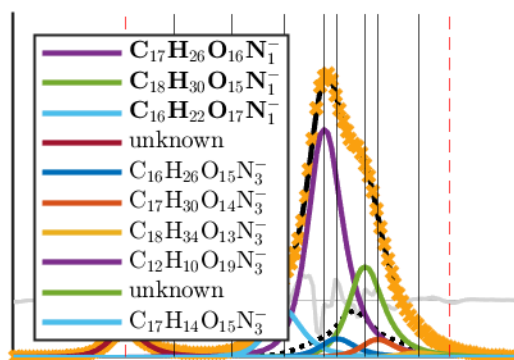

Manual fit

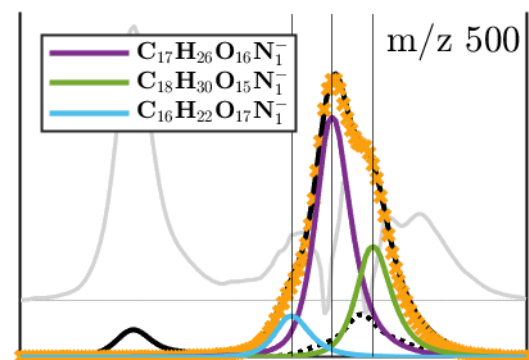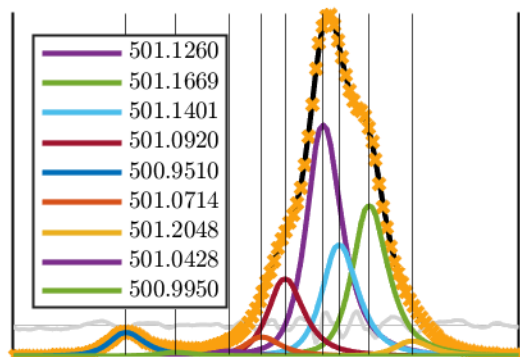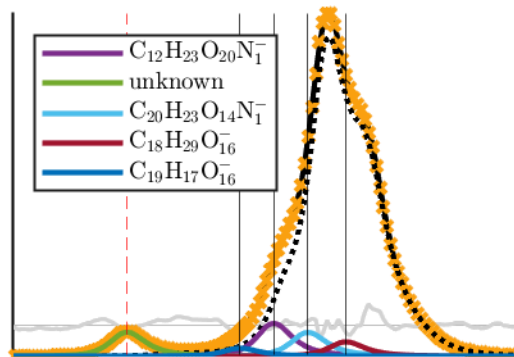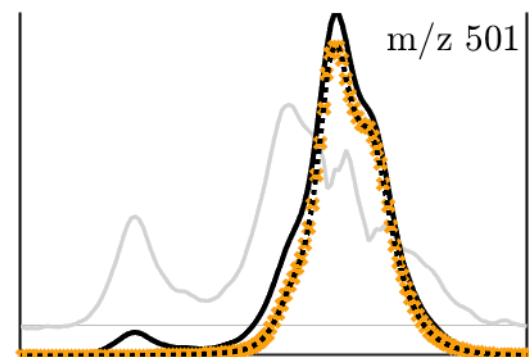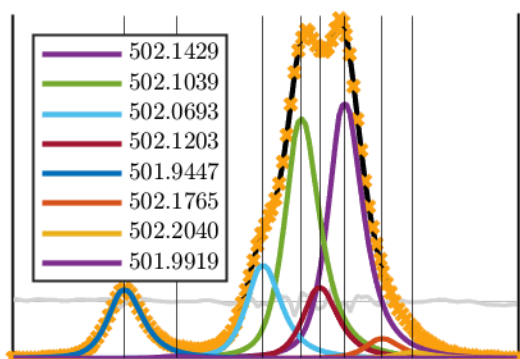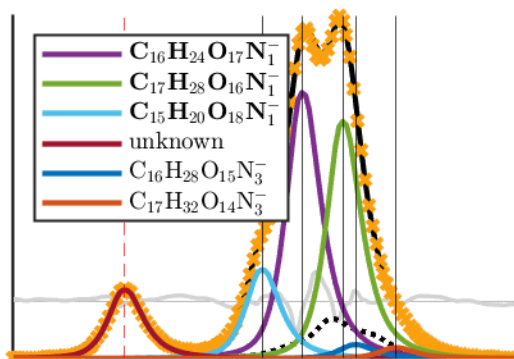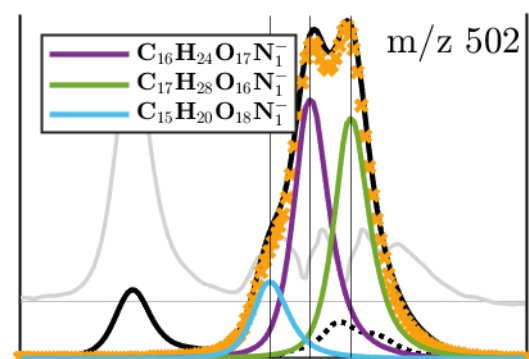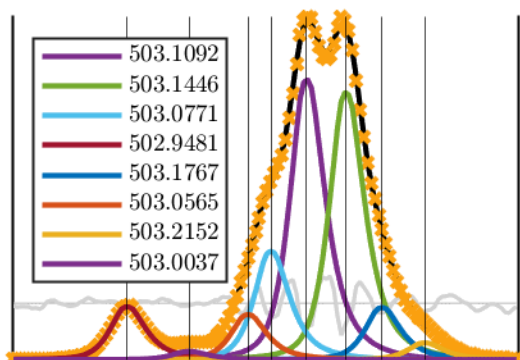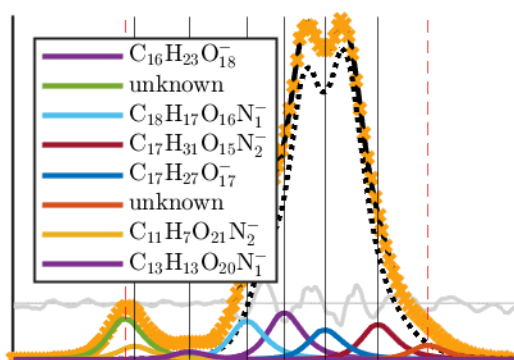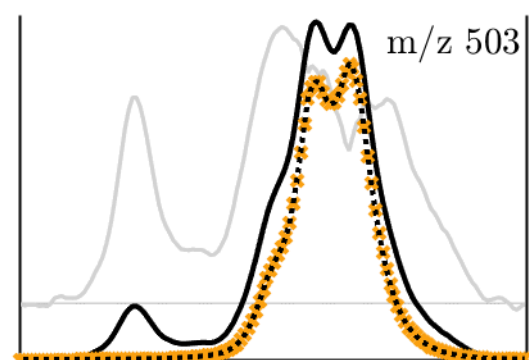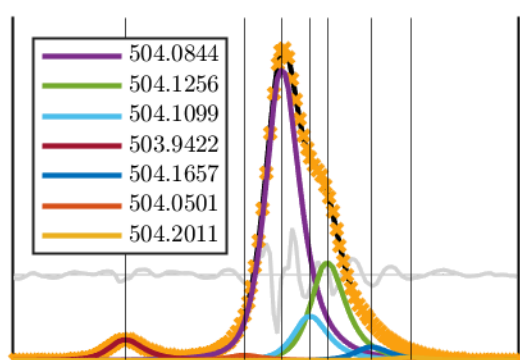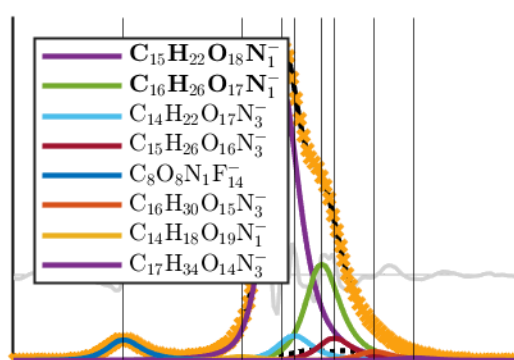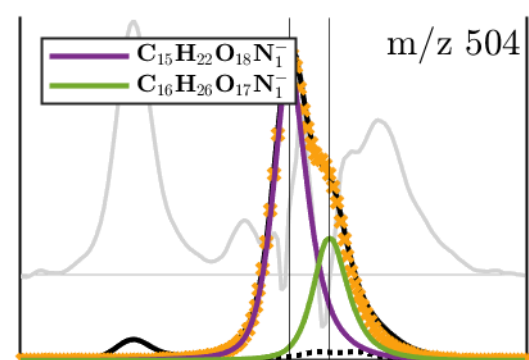



Free fit

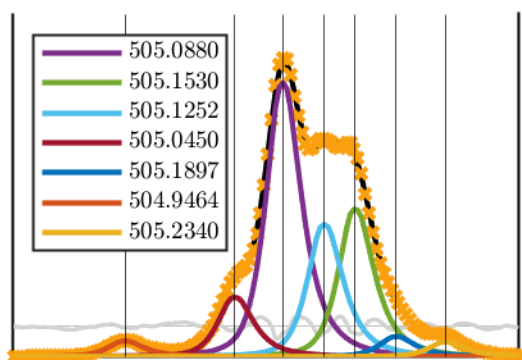

Final fit

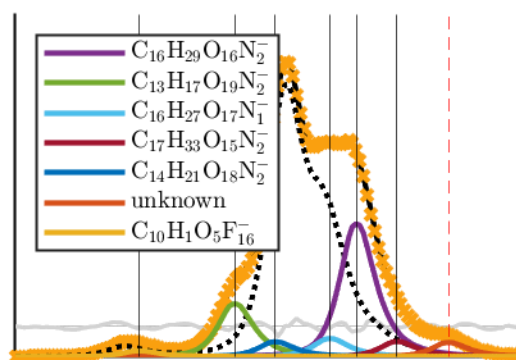

Manual fit

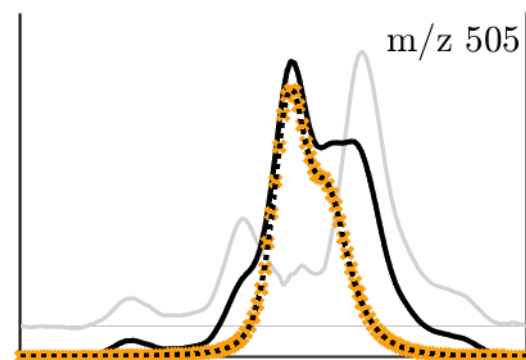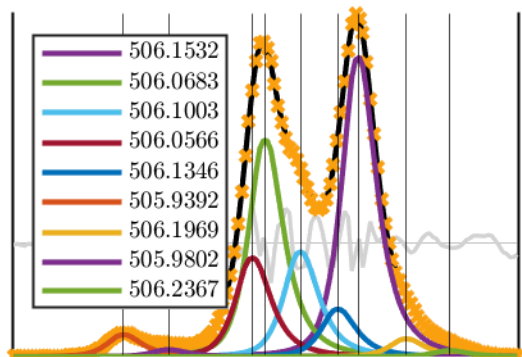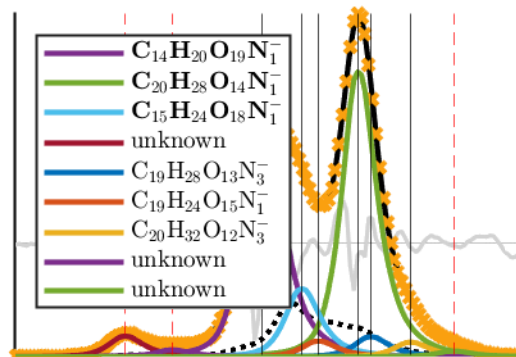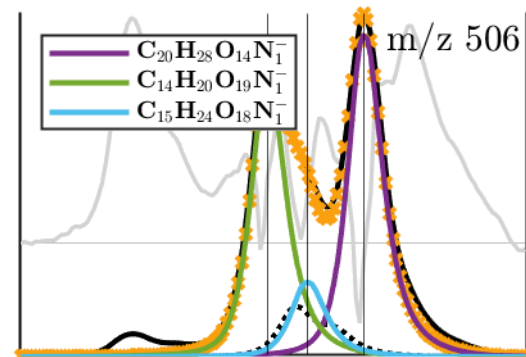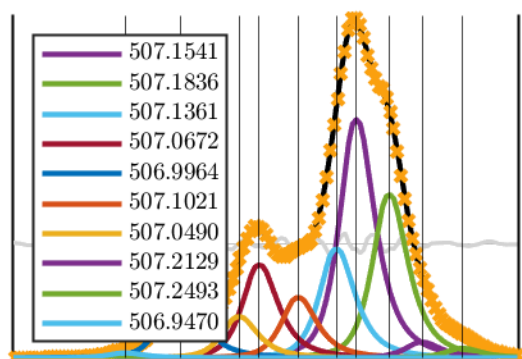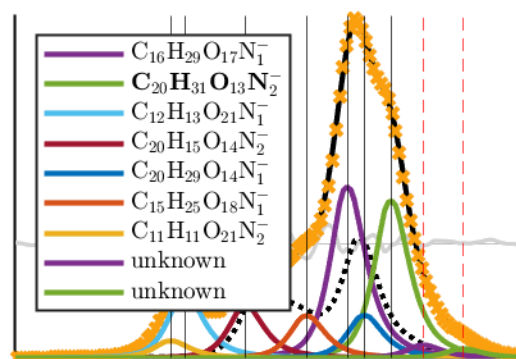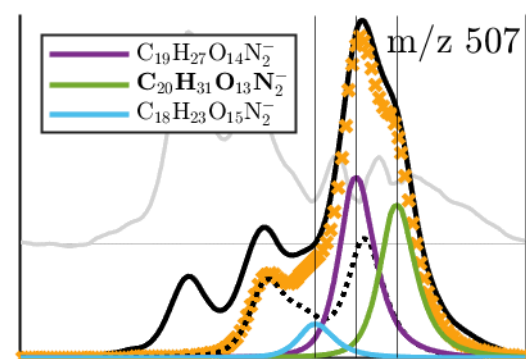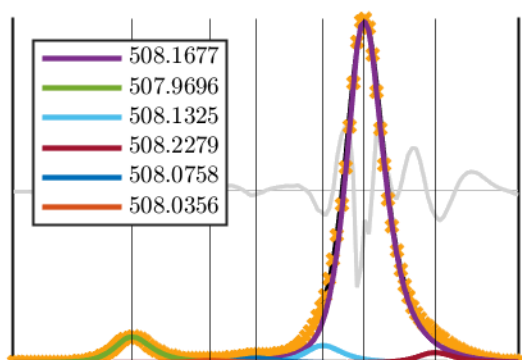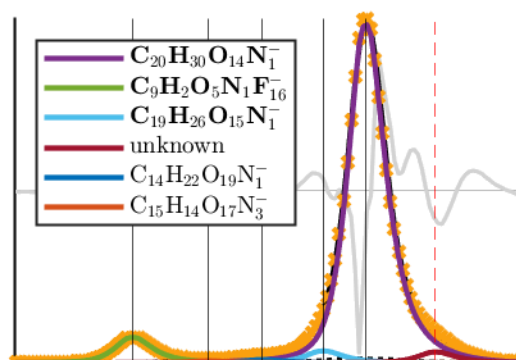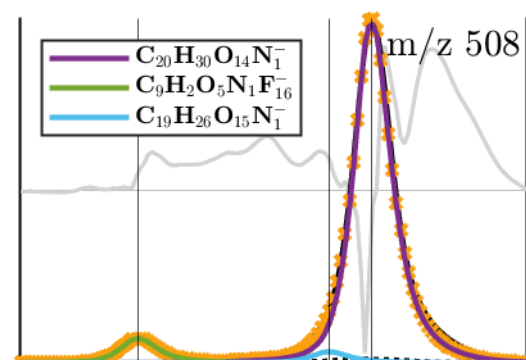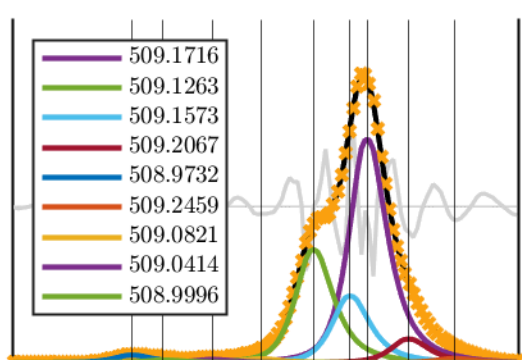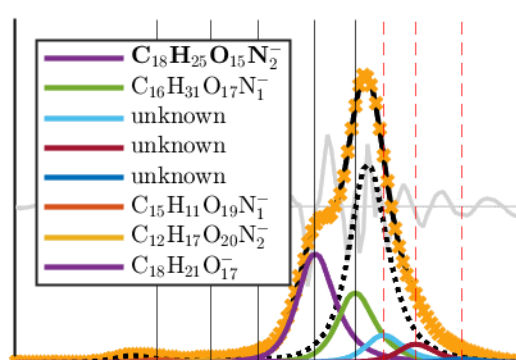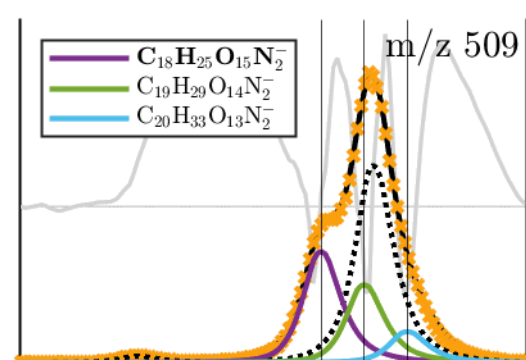

Free fit

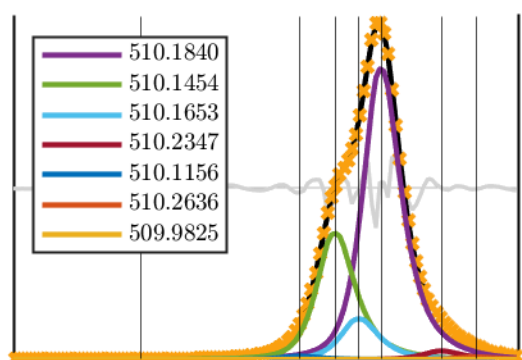

Final fit

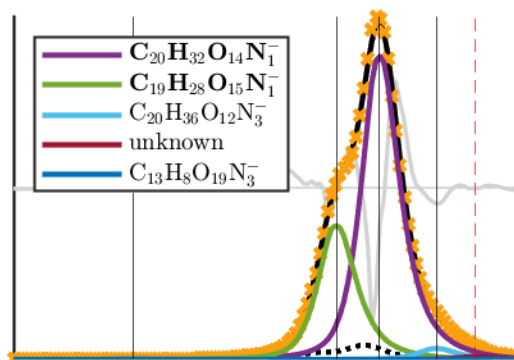

Manual fit

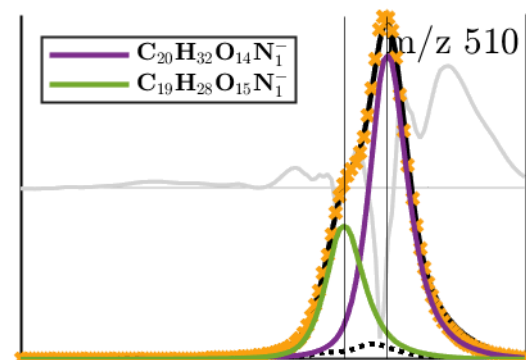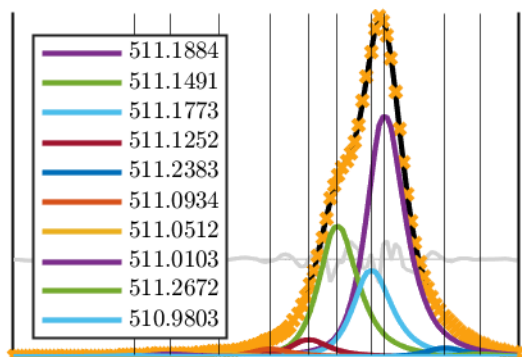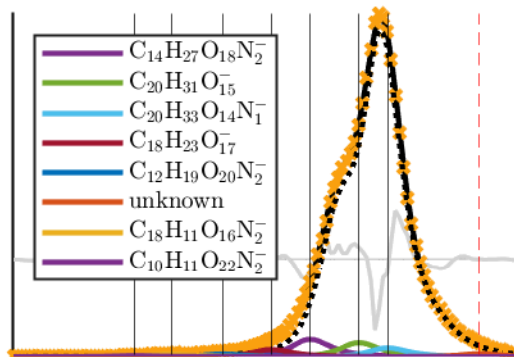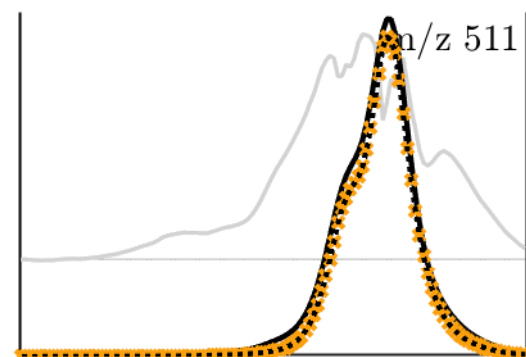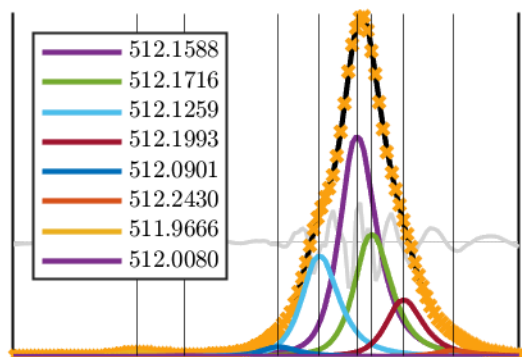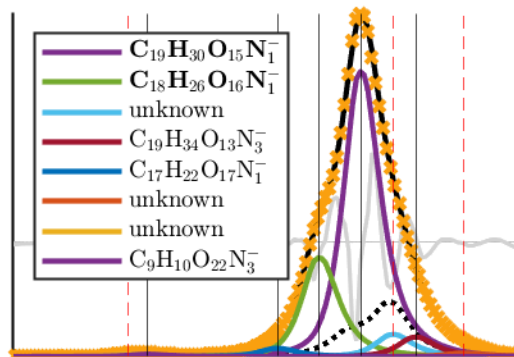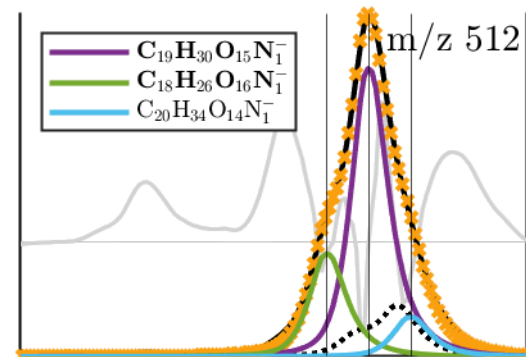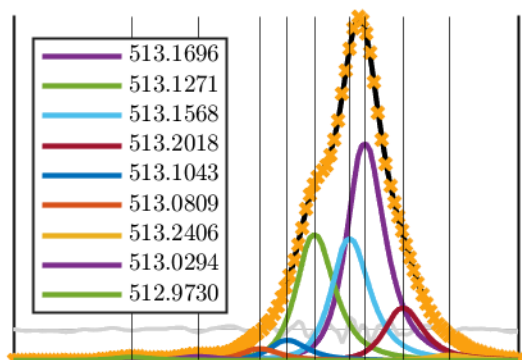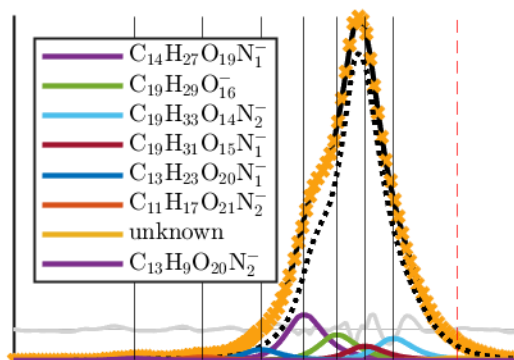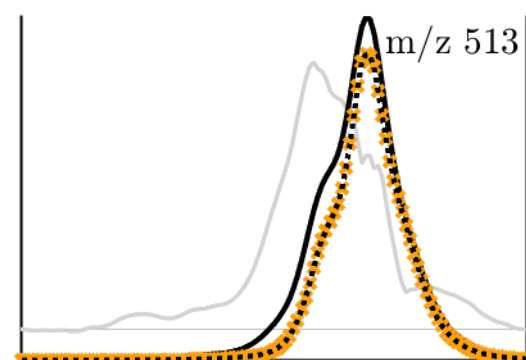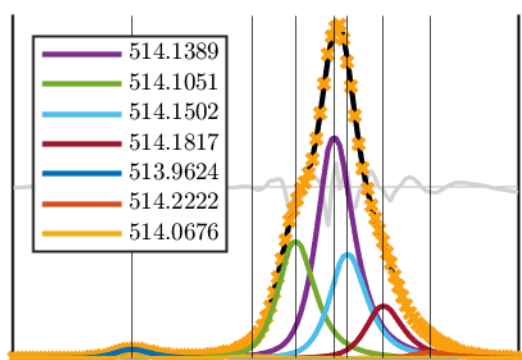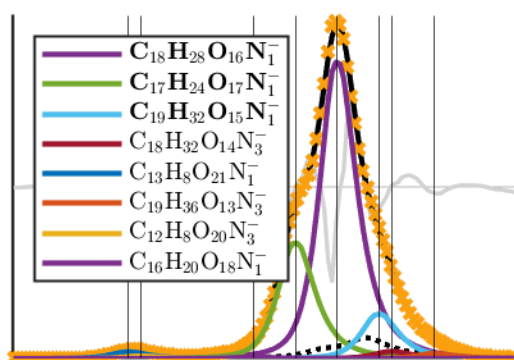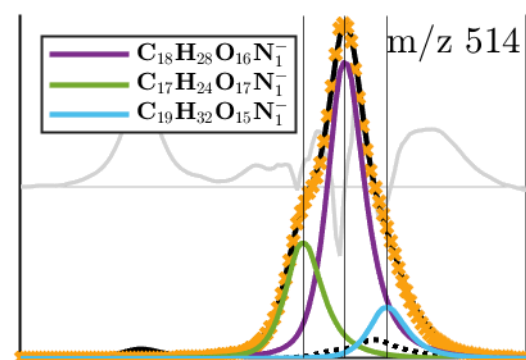

Free fit

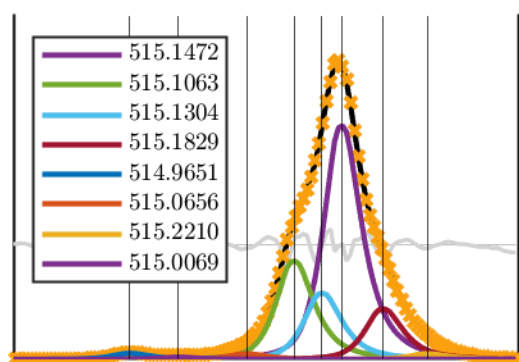

Final fit

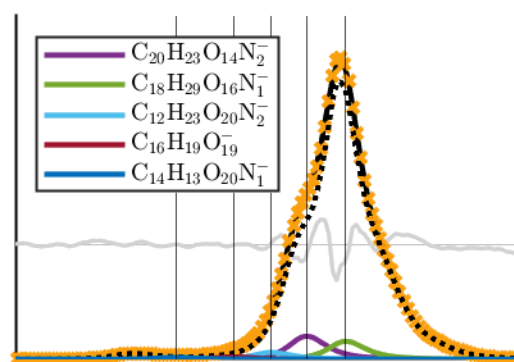

Manual fit

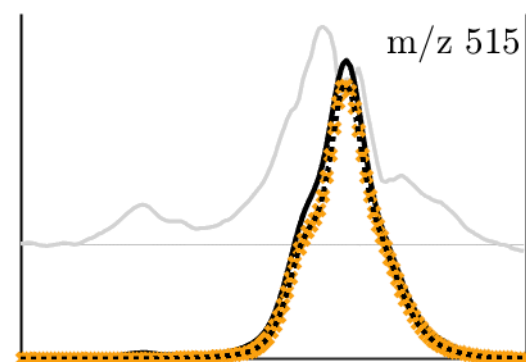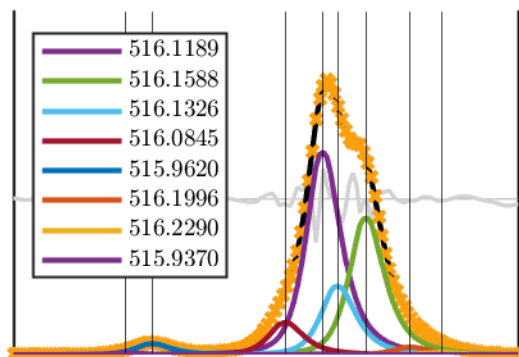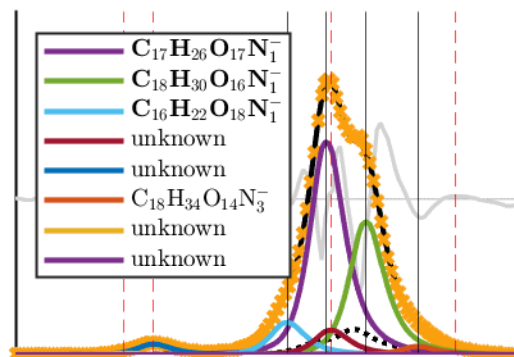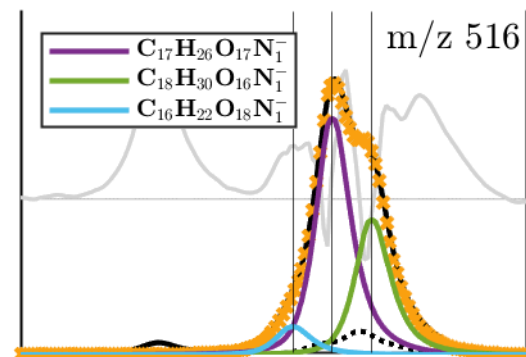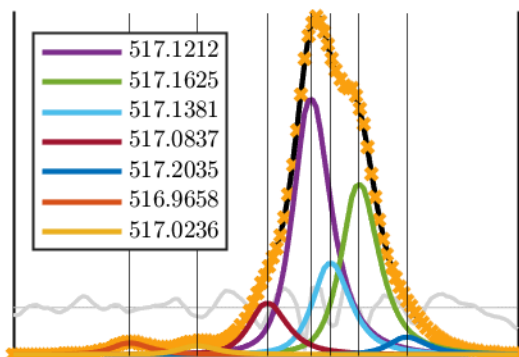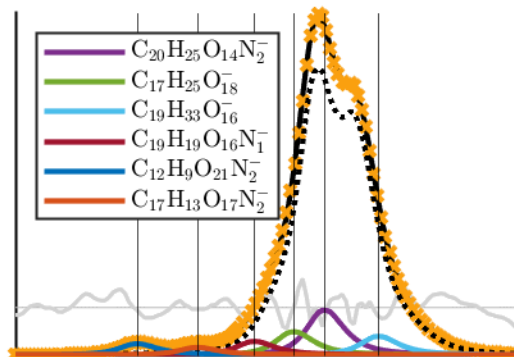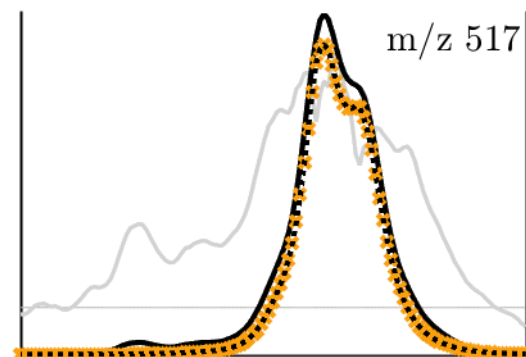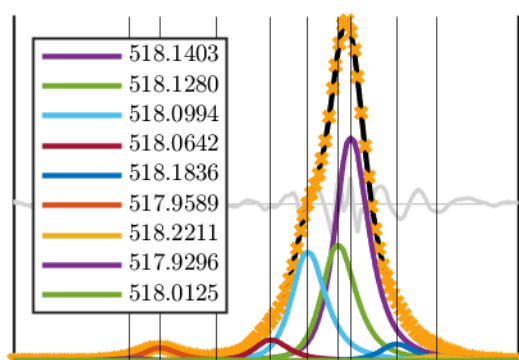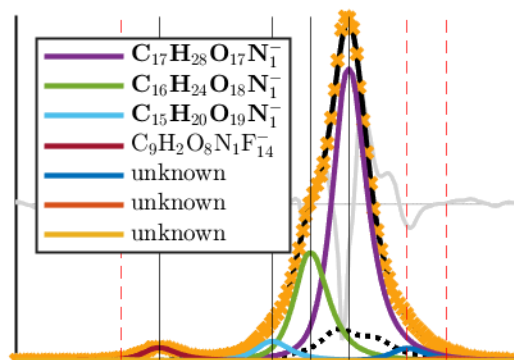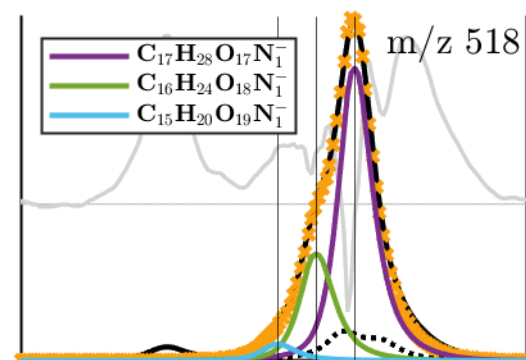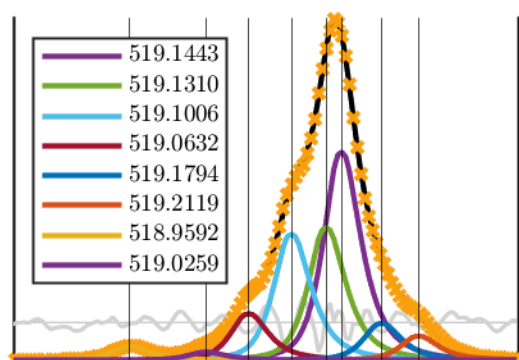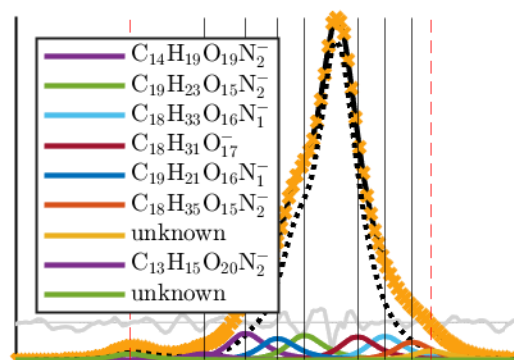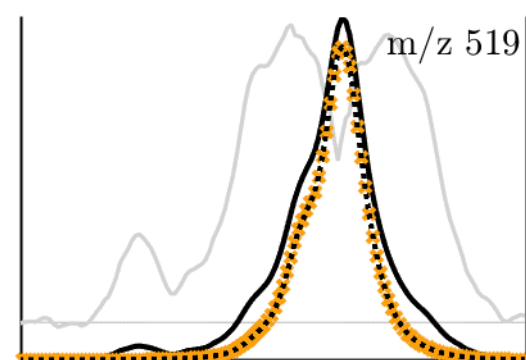



Free fit

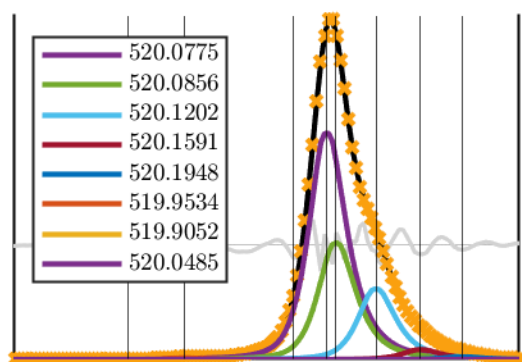

Final fit

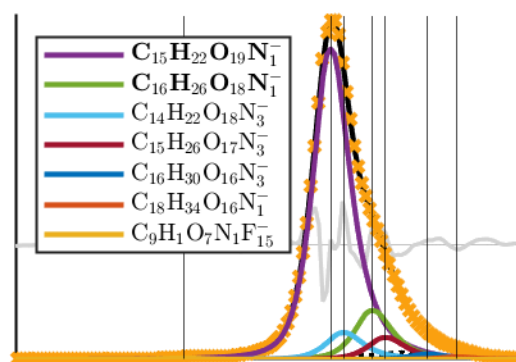

Manual fit

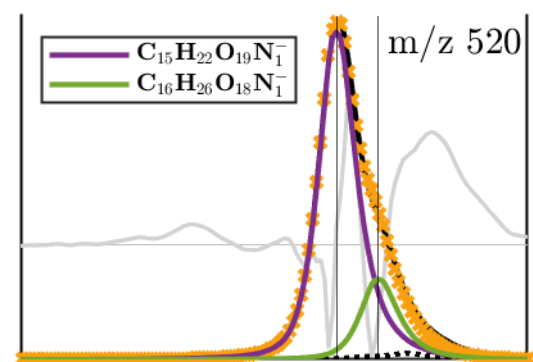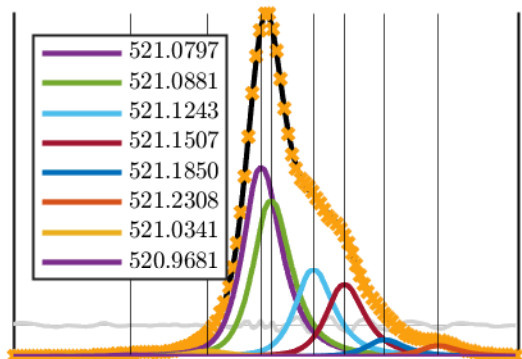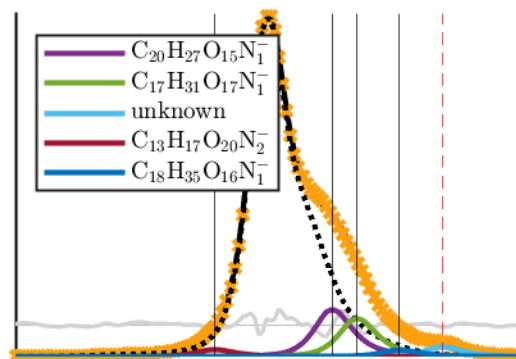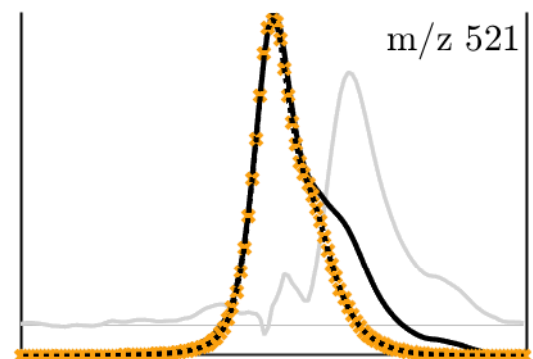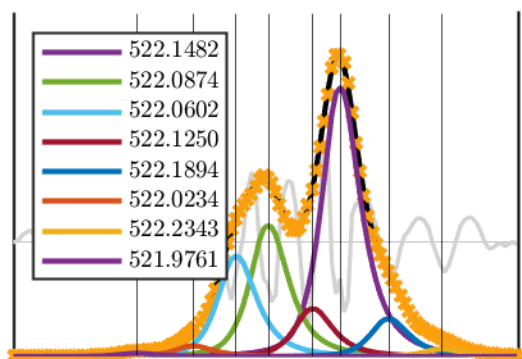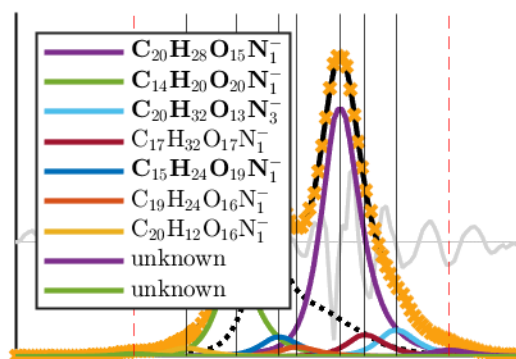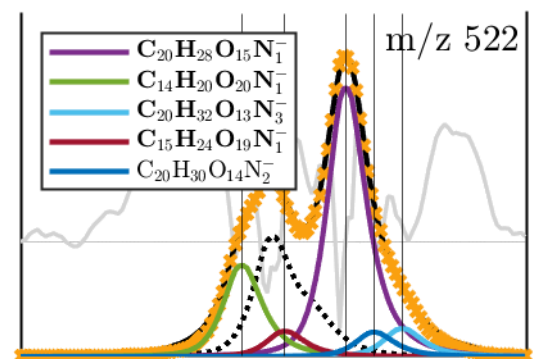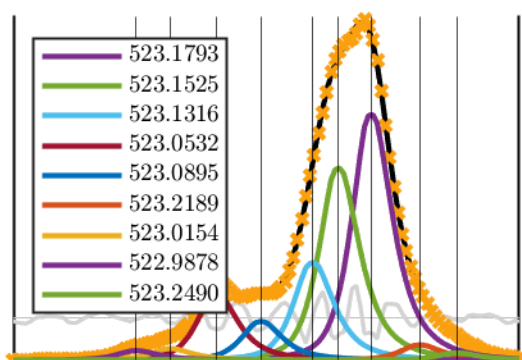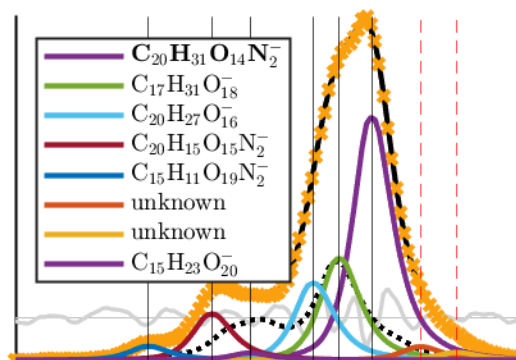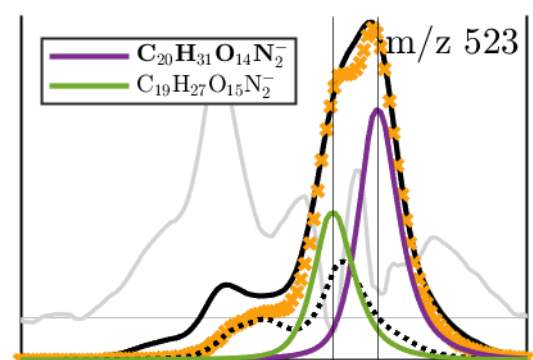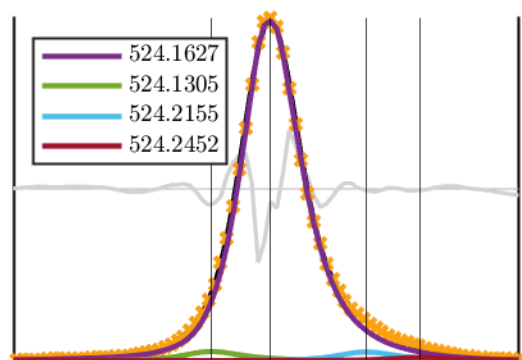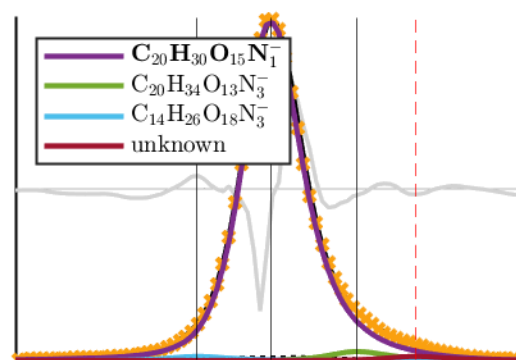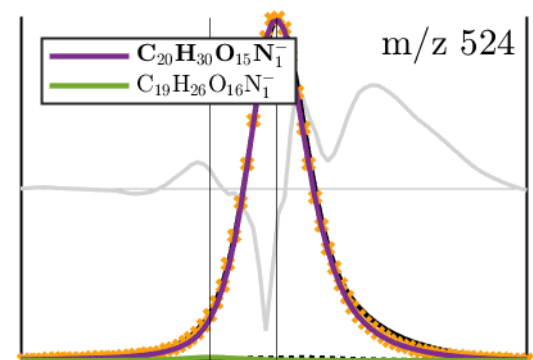

Free fit

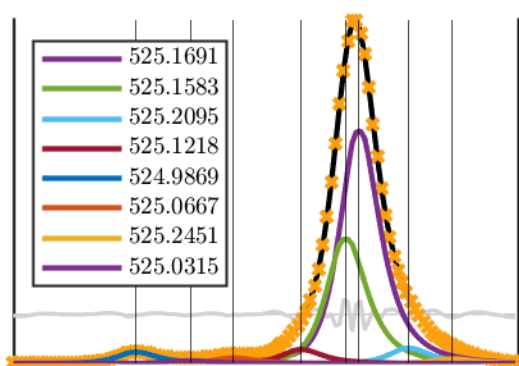

Final fit

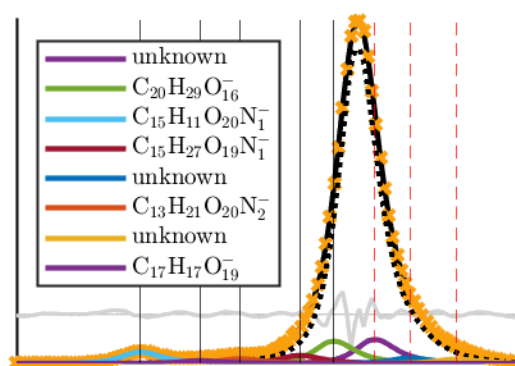

Manual fit

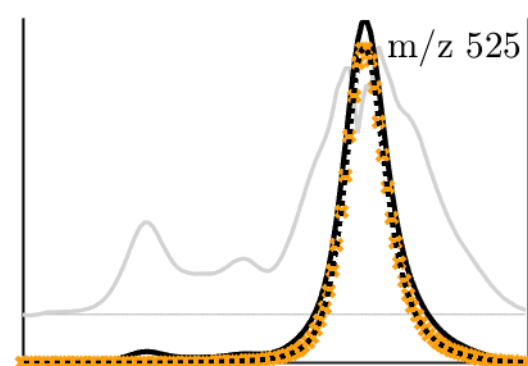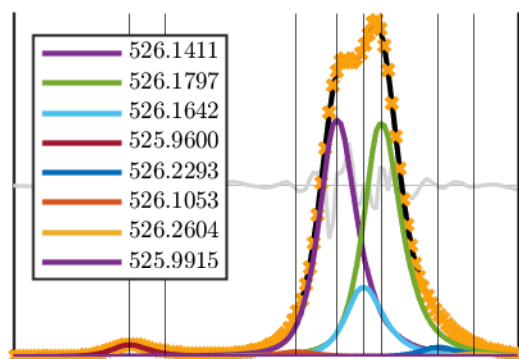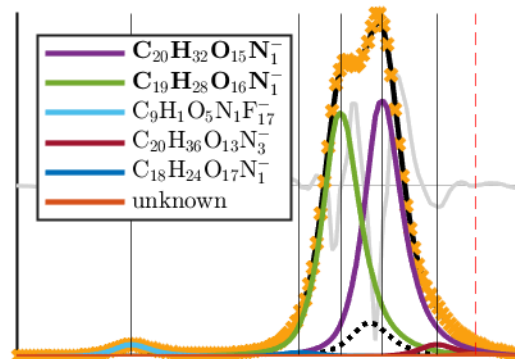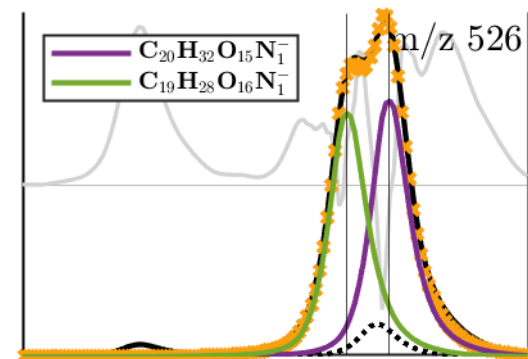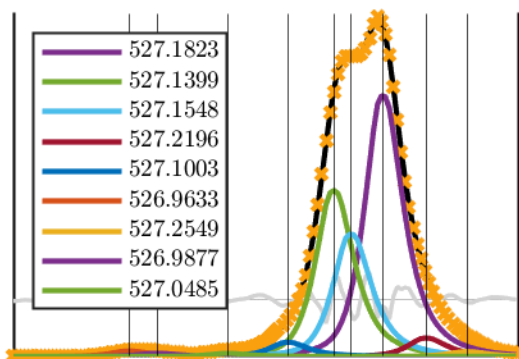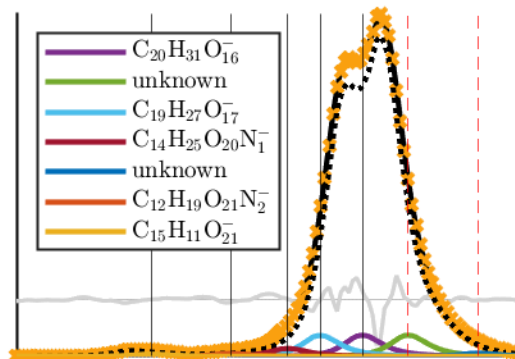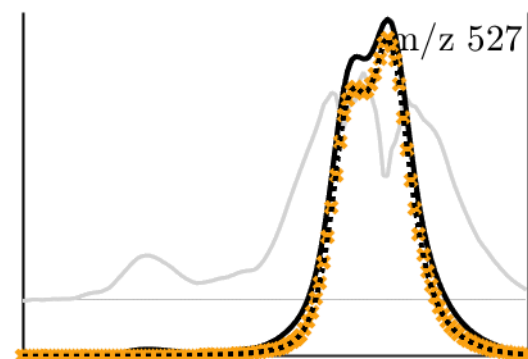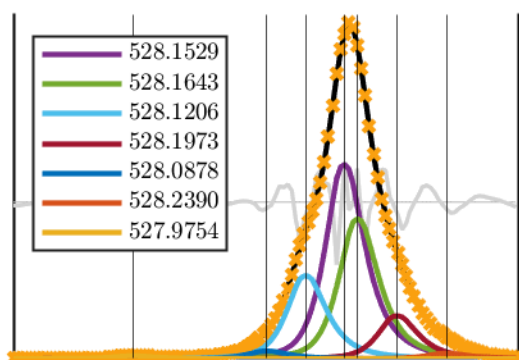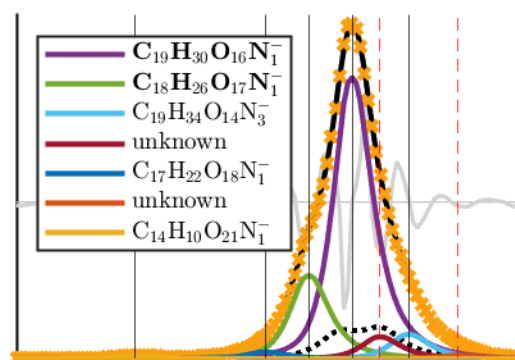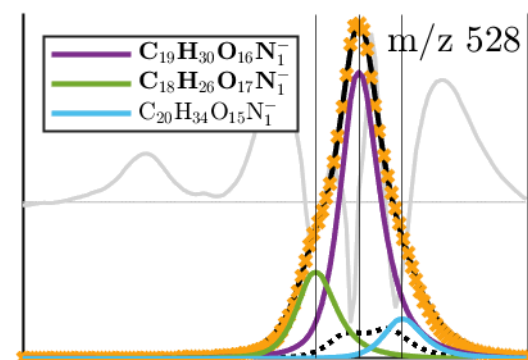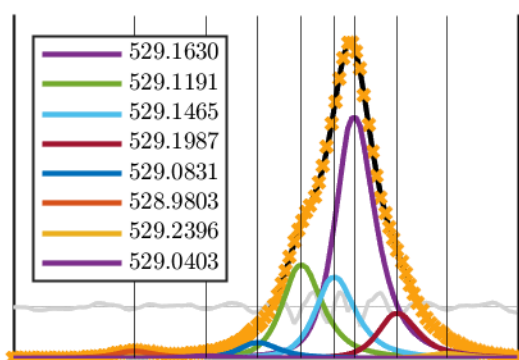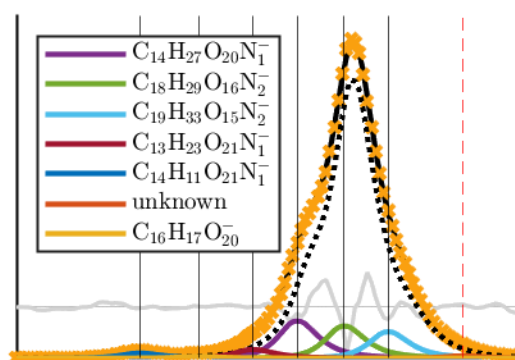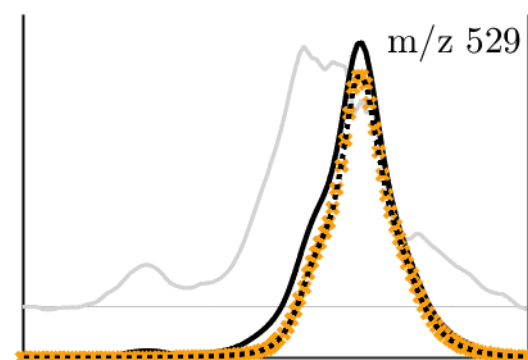

Free fit

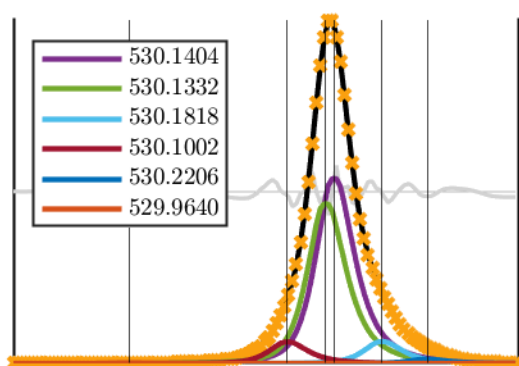

Final fit

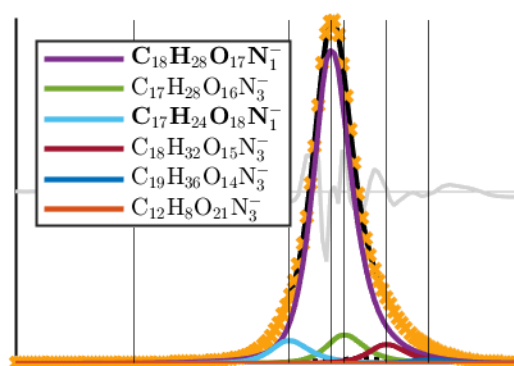

Manual fit

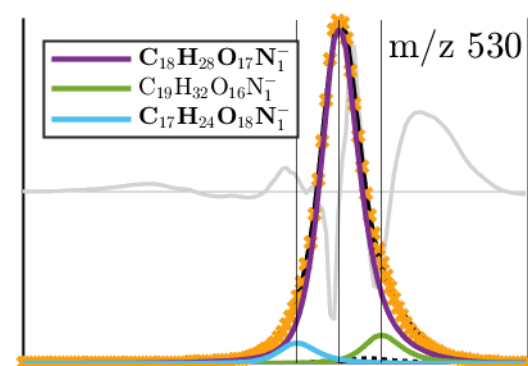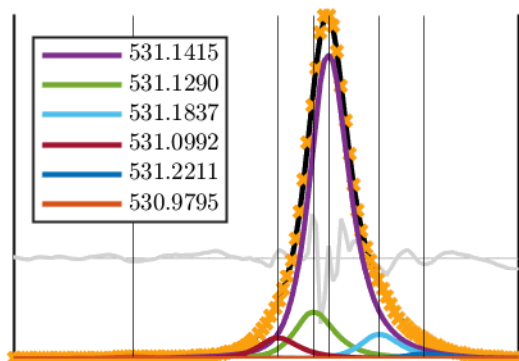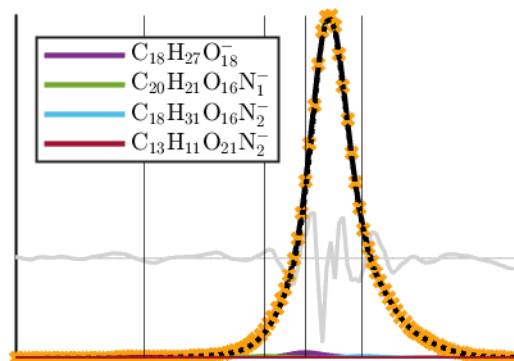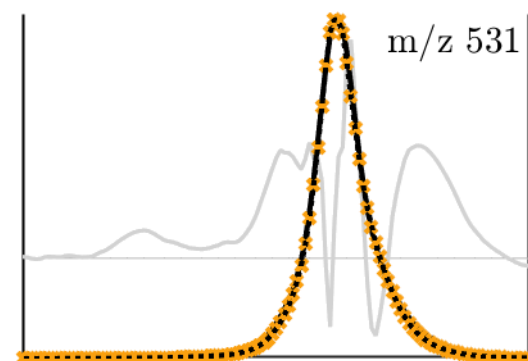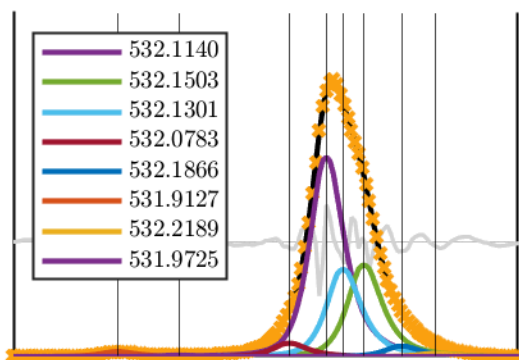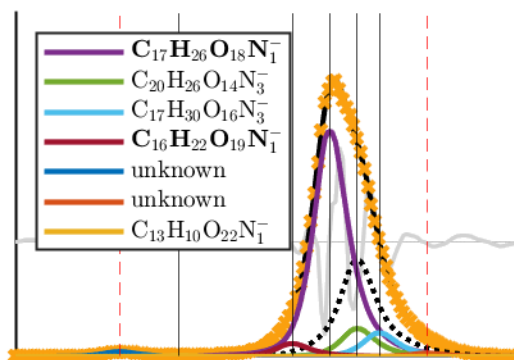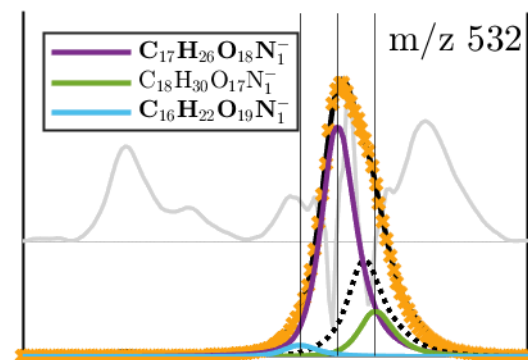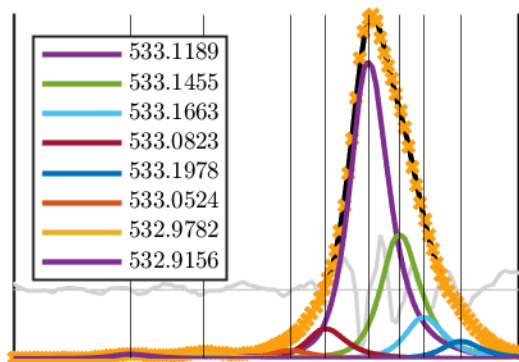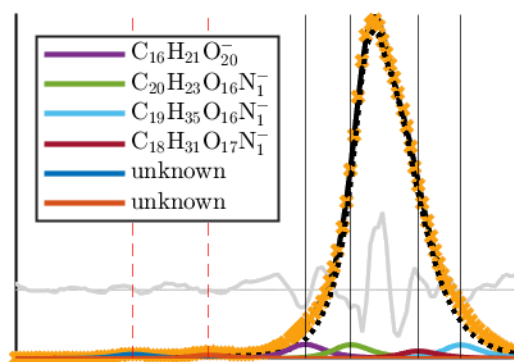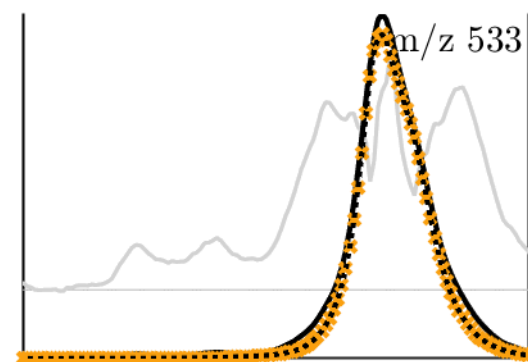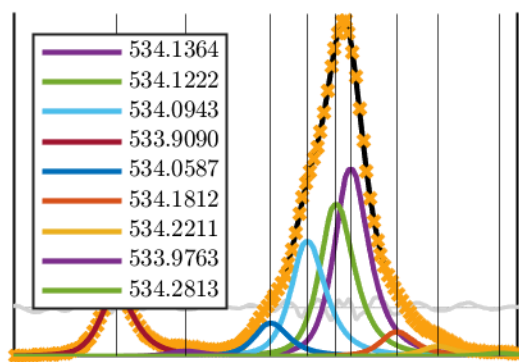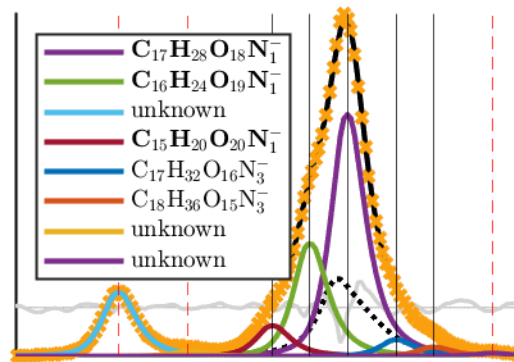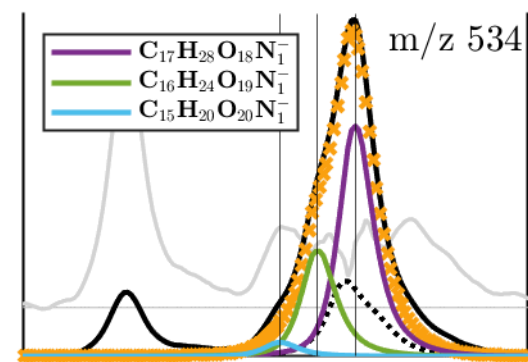



Free fit

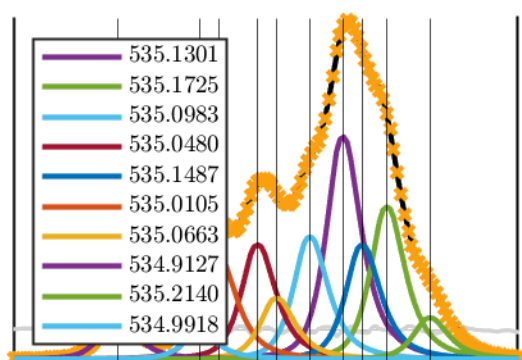

Final fit

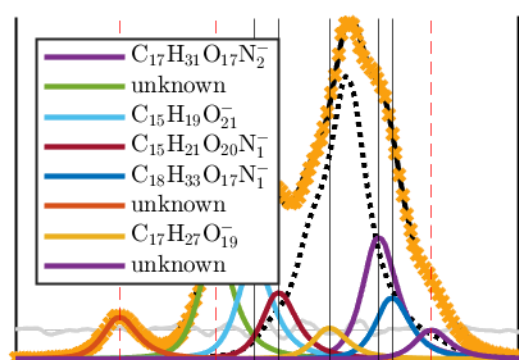

Manual fit

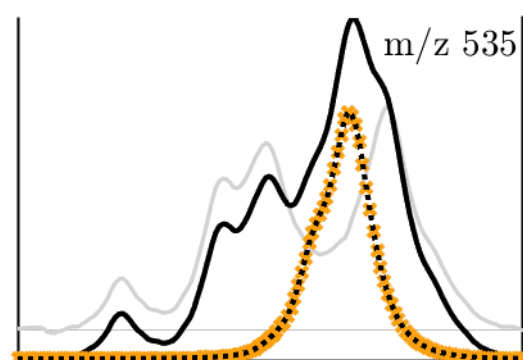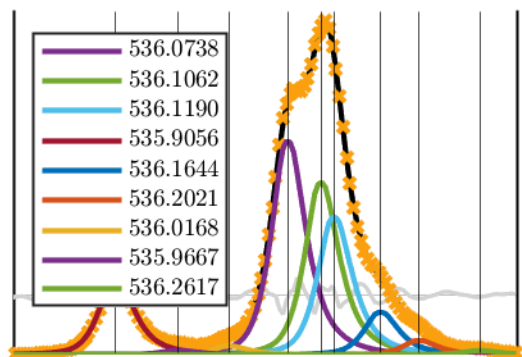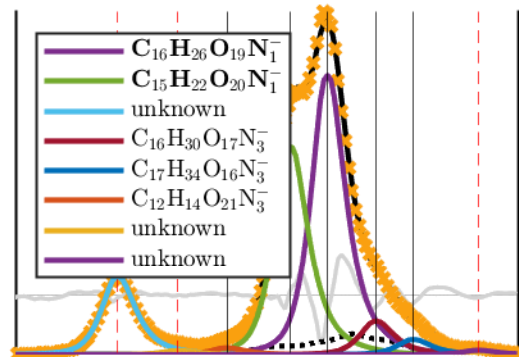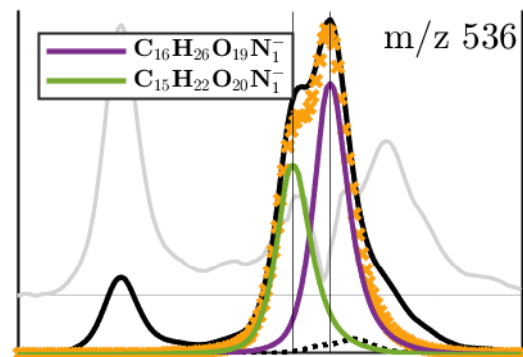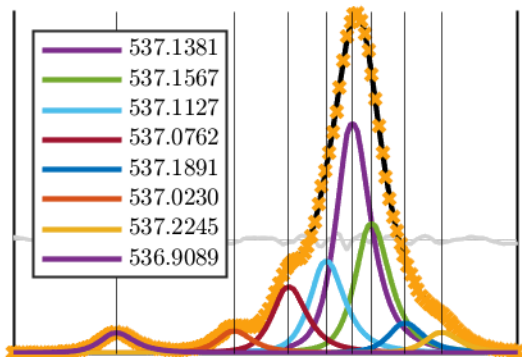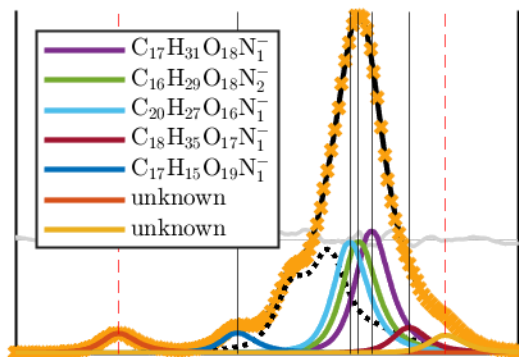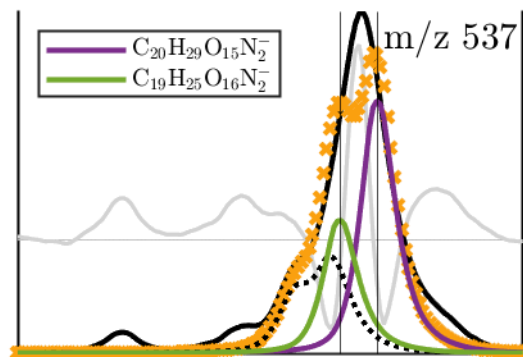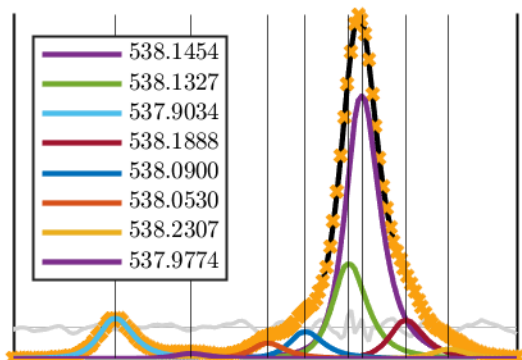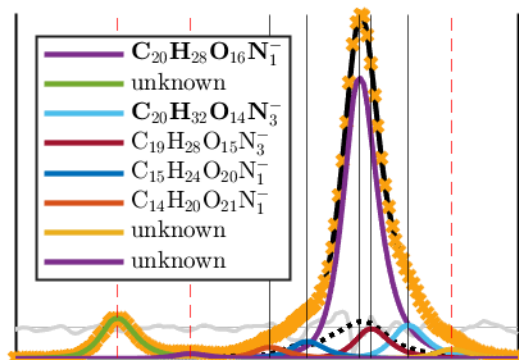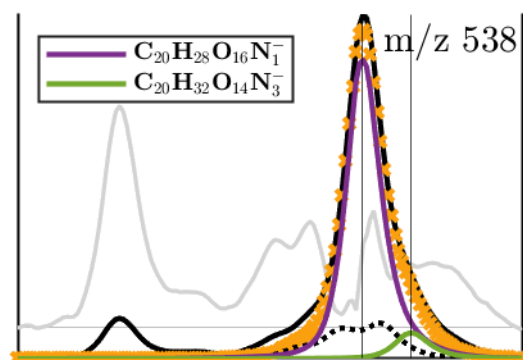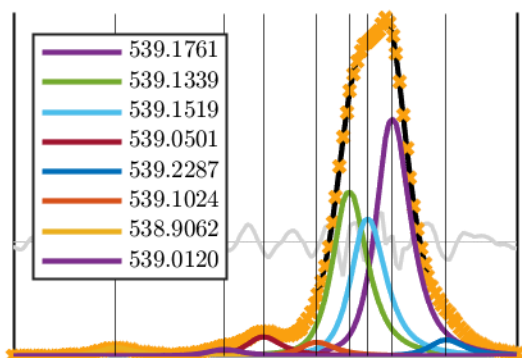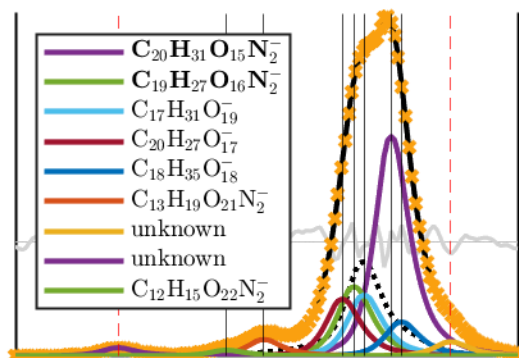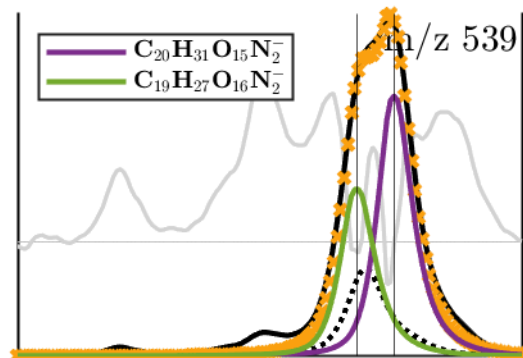

Free fit

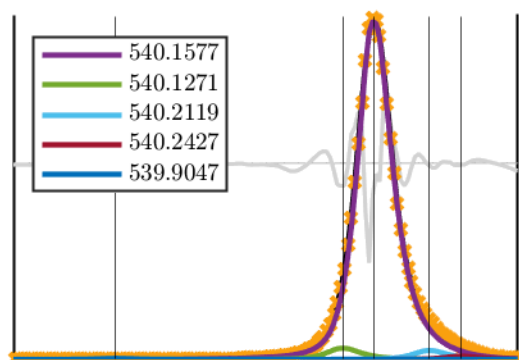

Final fit

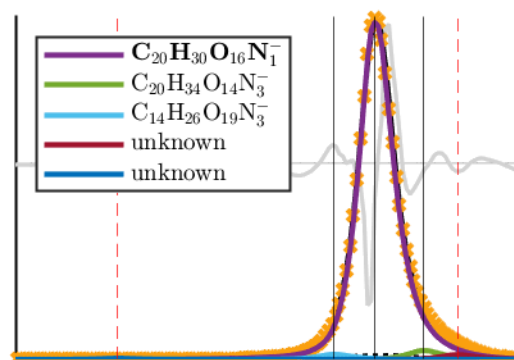

Manual fit

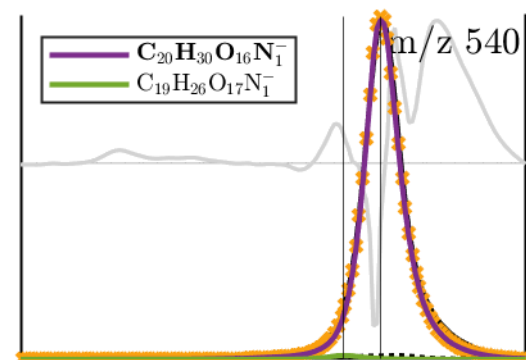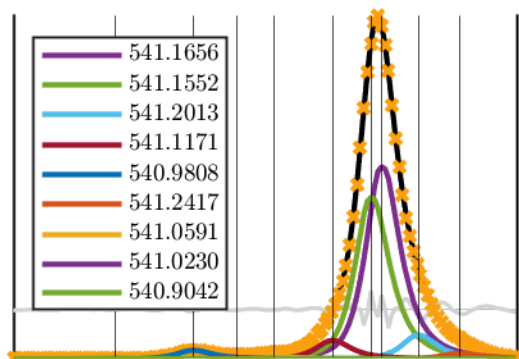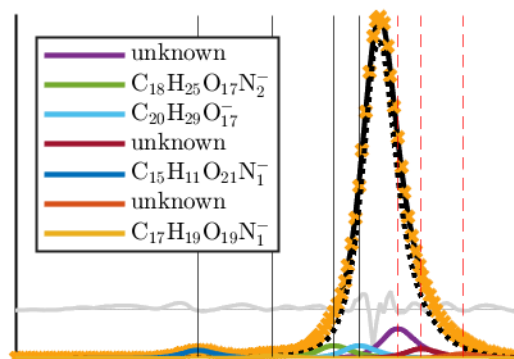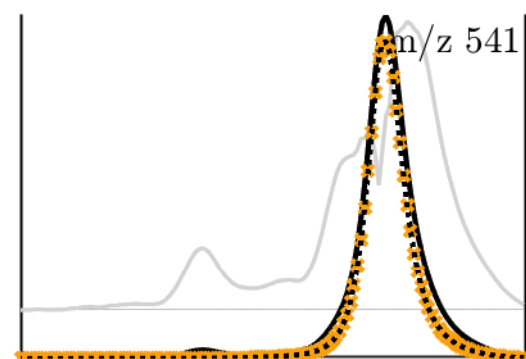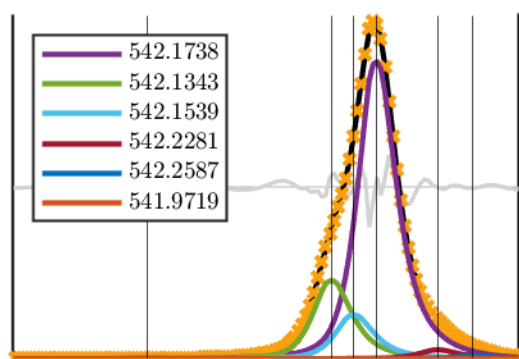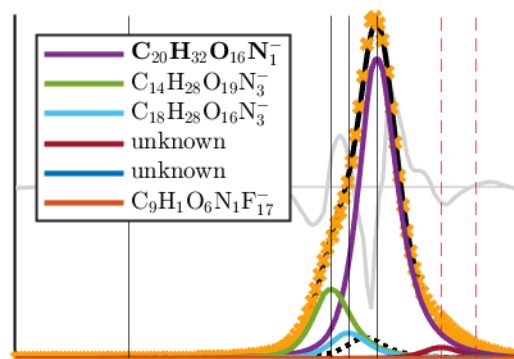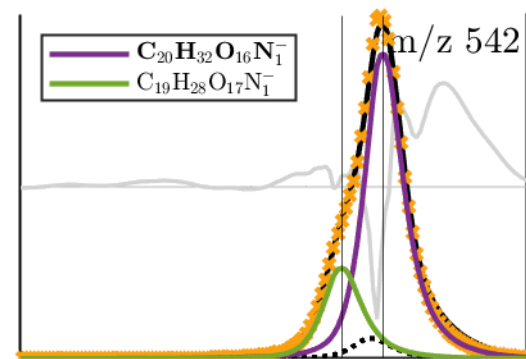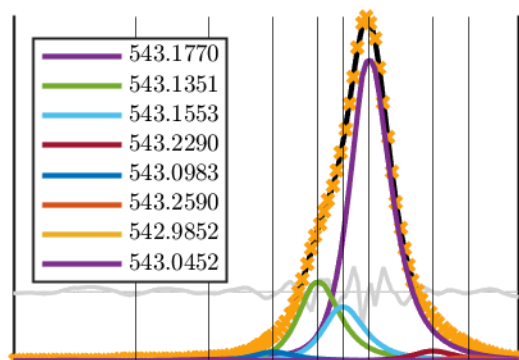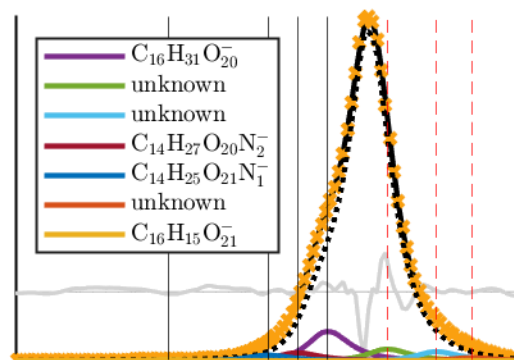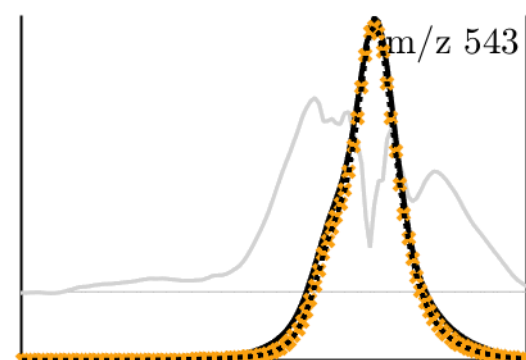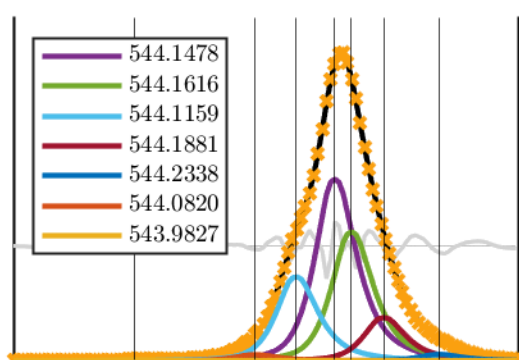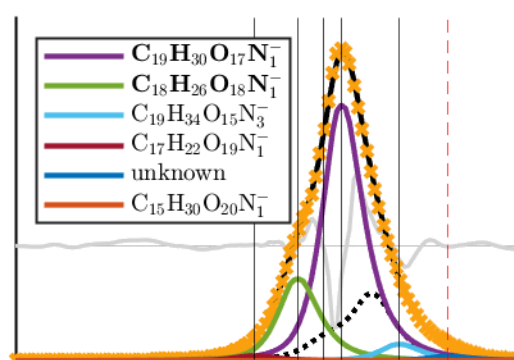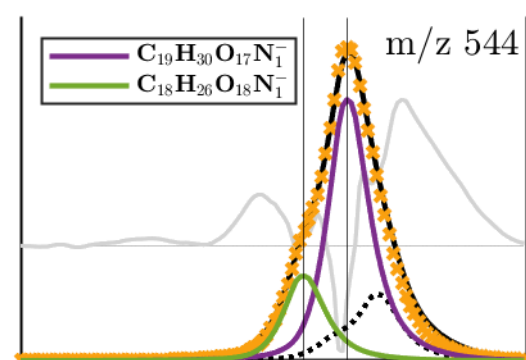

Free fit

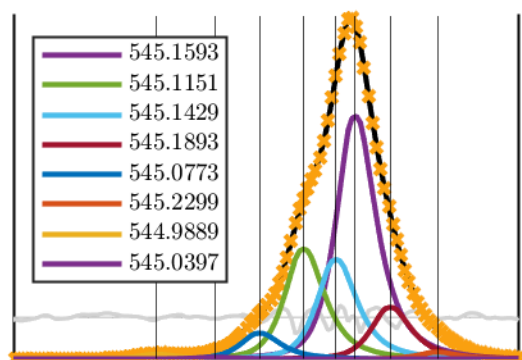

Final fit

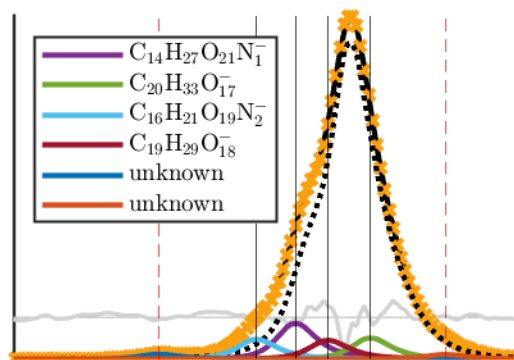

Manual fit

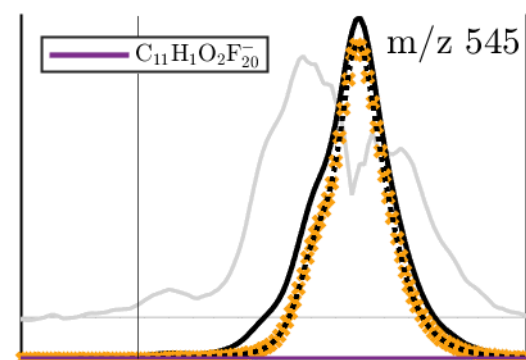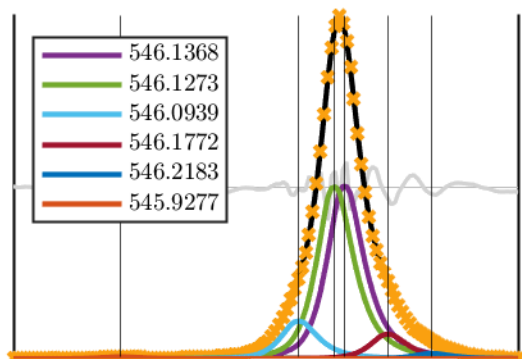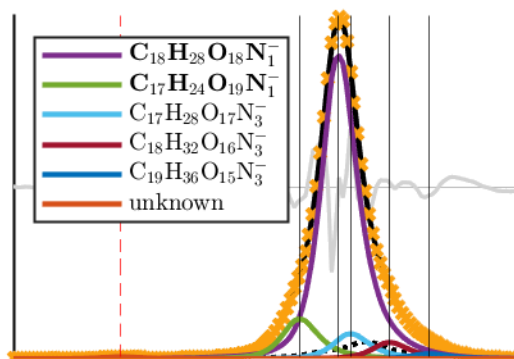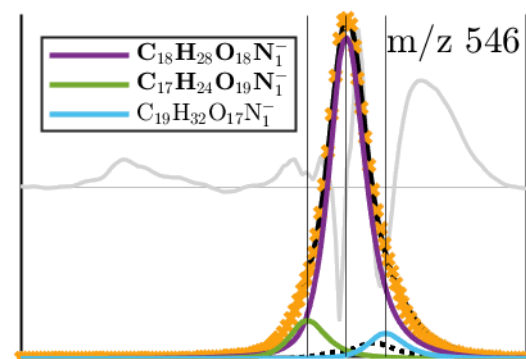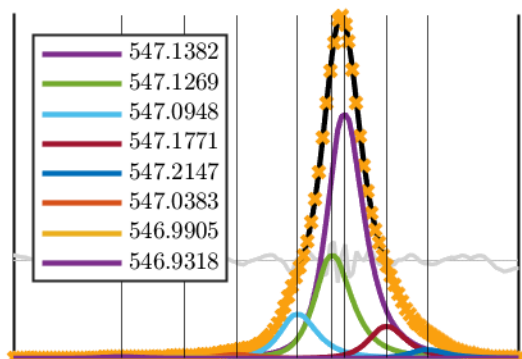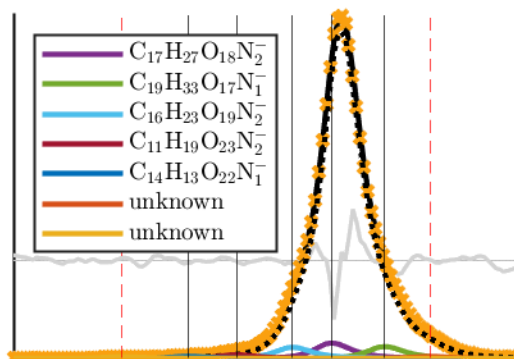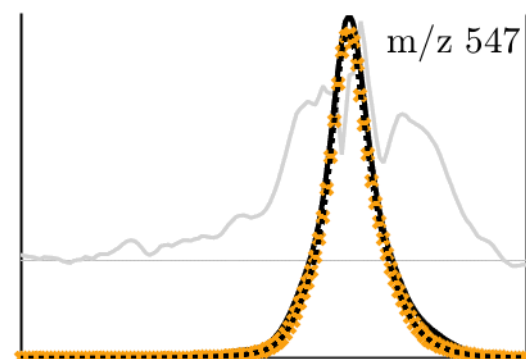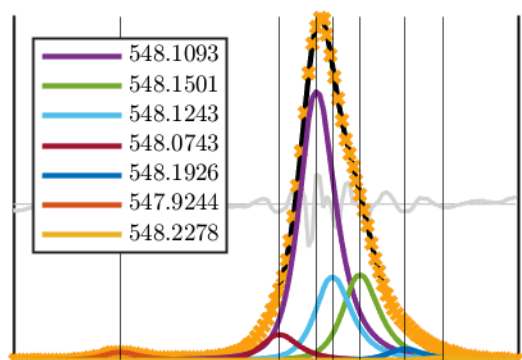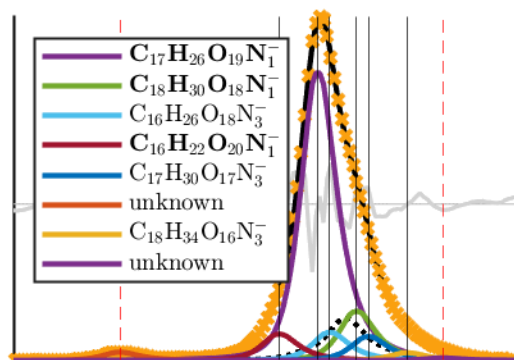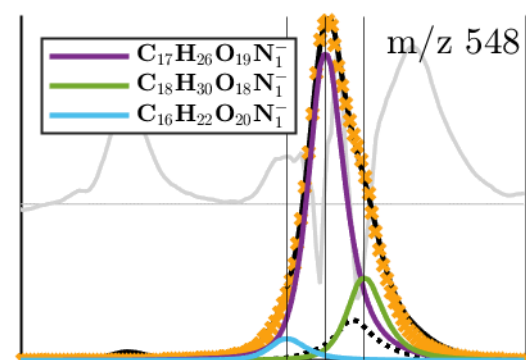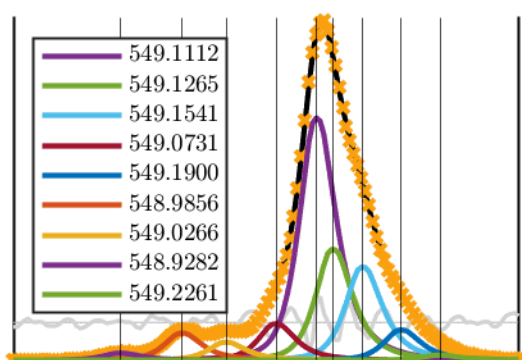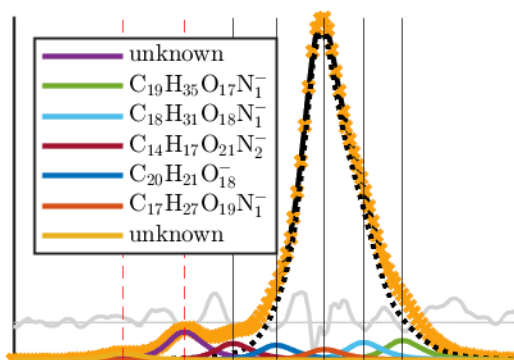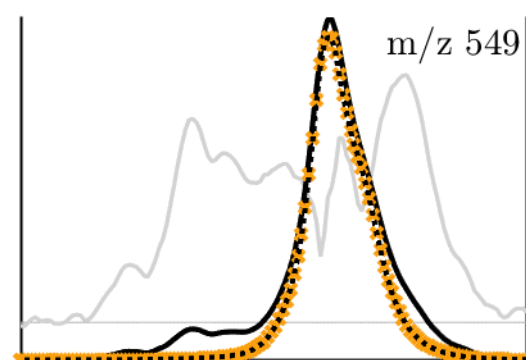



Free fit

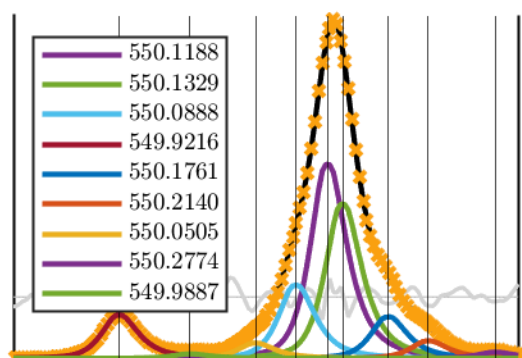

Final fit

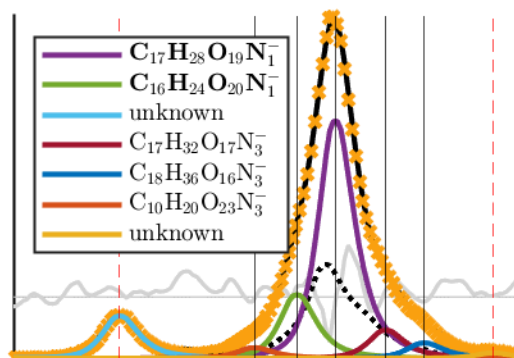

Manual fit

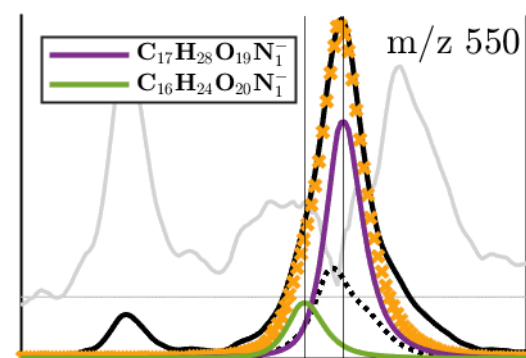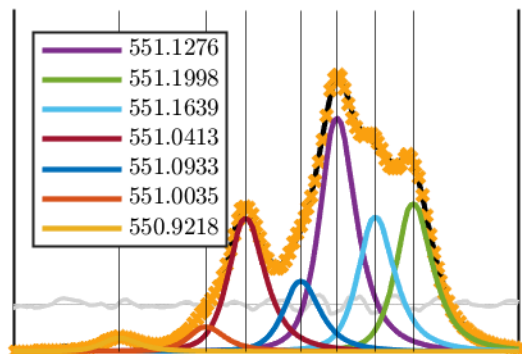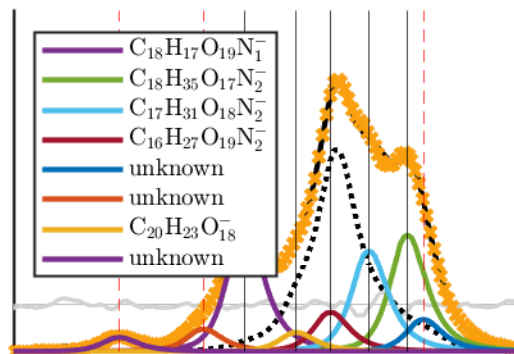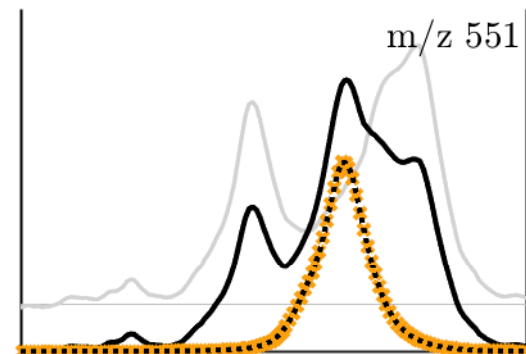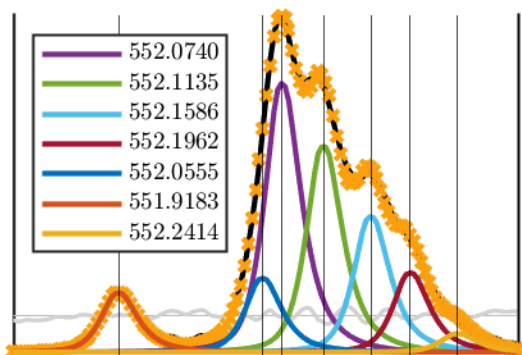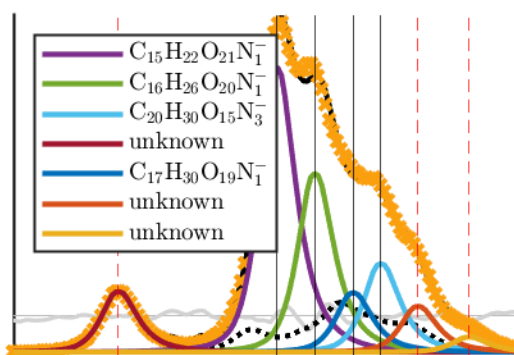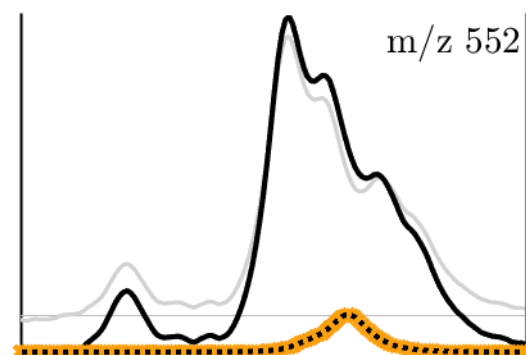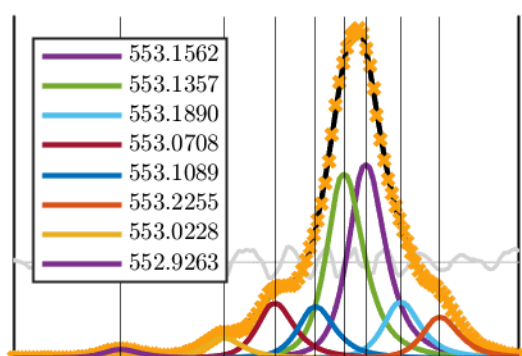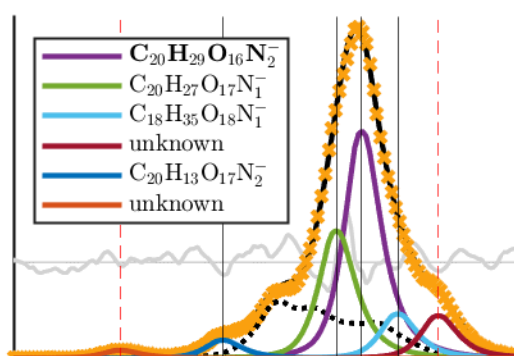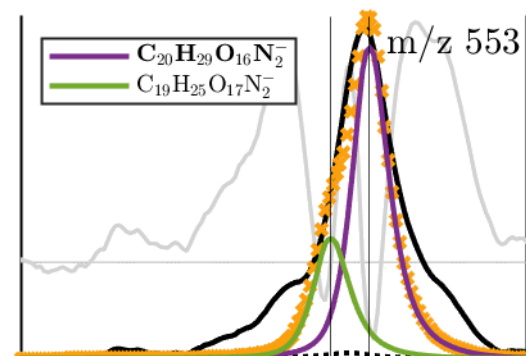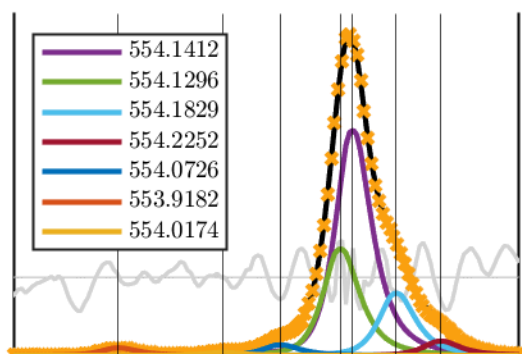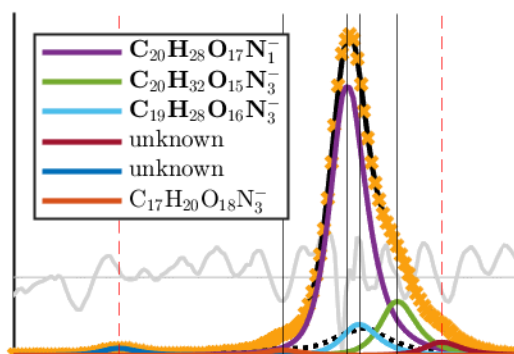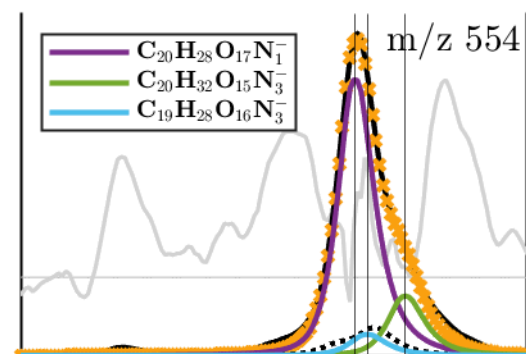

Free fit

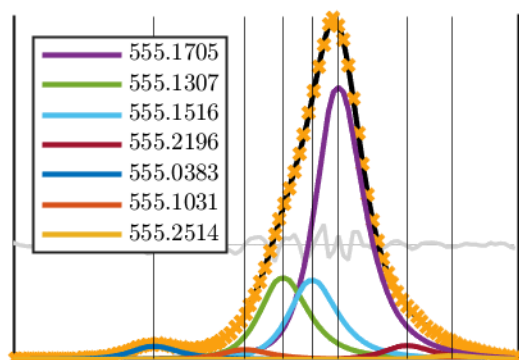

Final fit

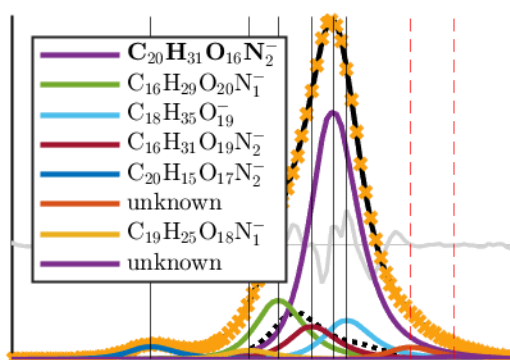

Manual fit

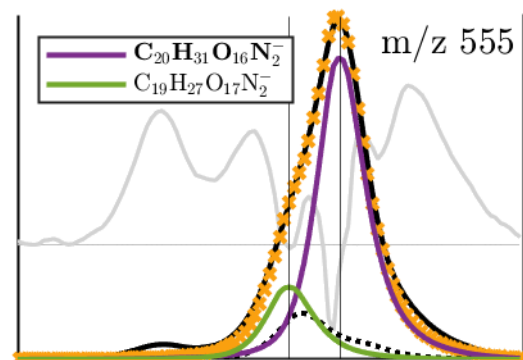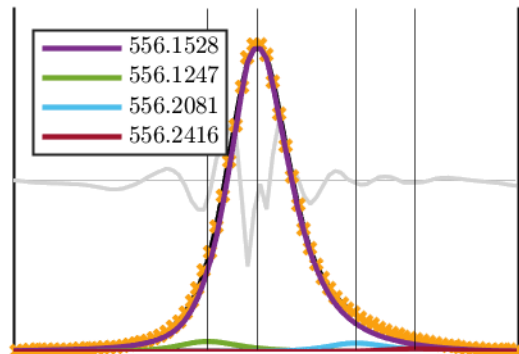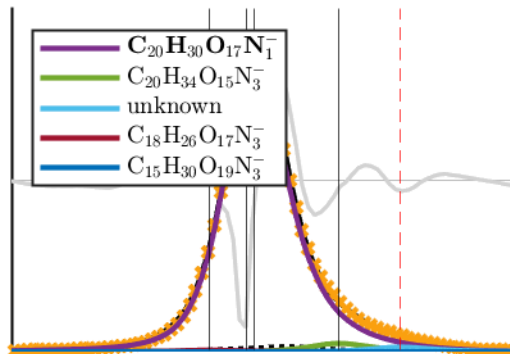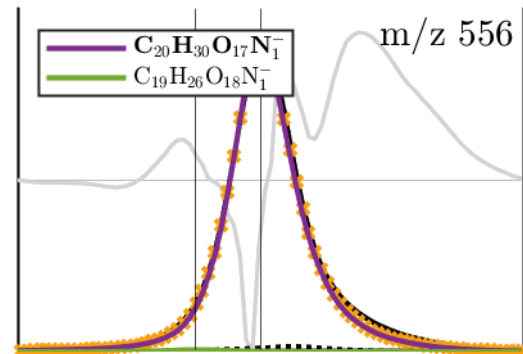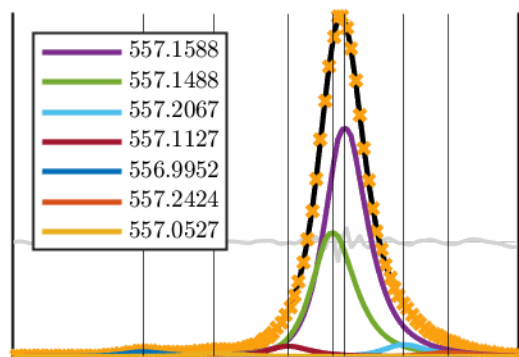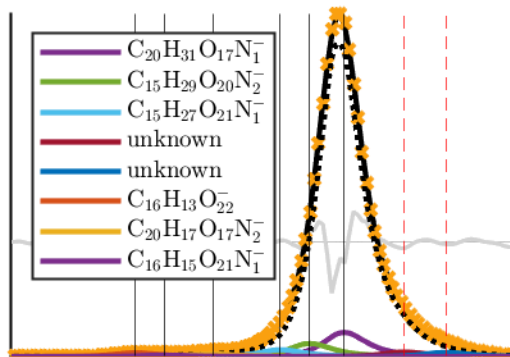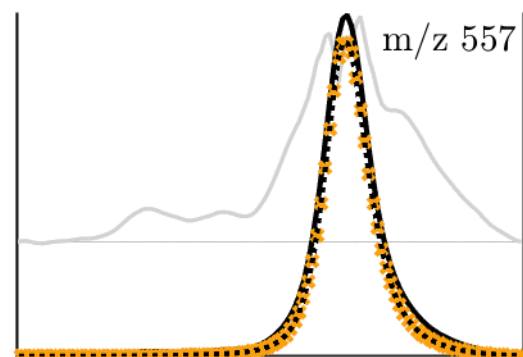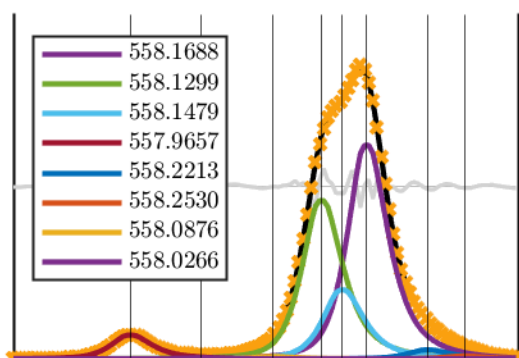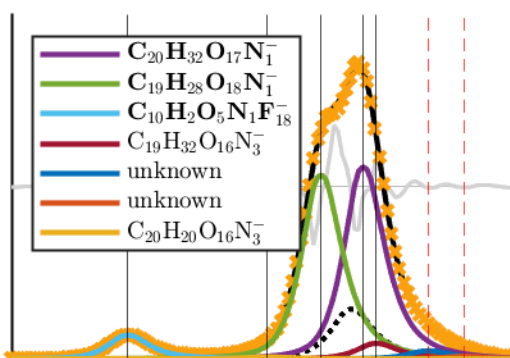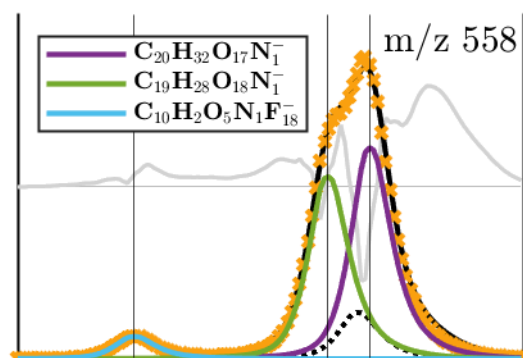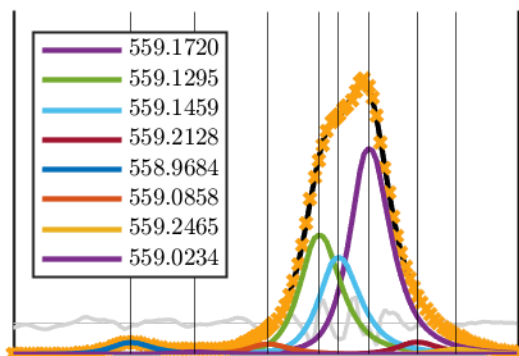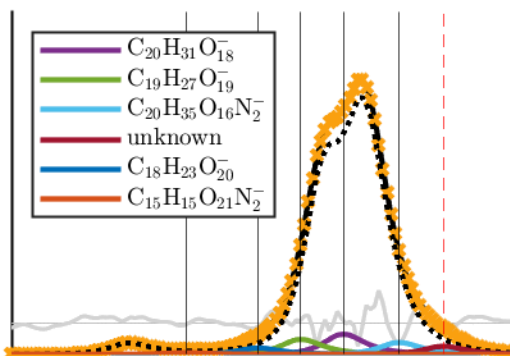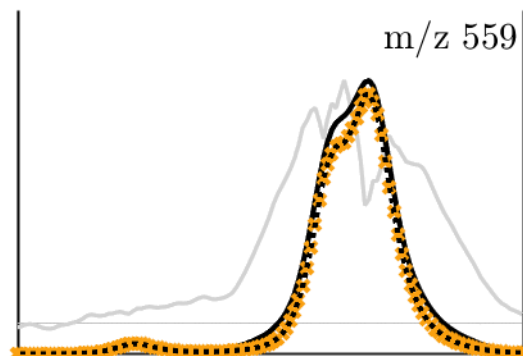

Free fit

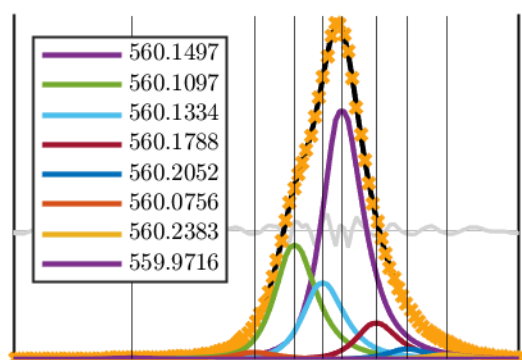

Final fit

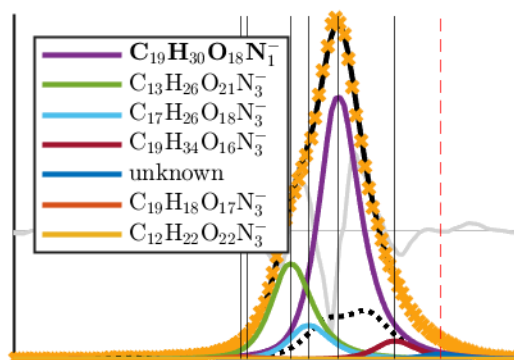

Manual fit

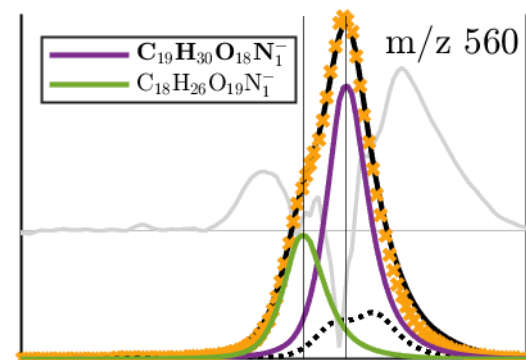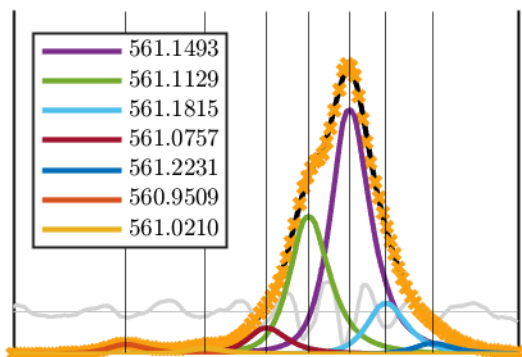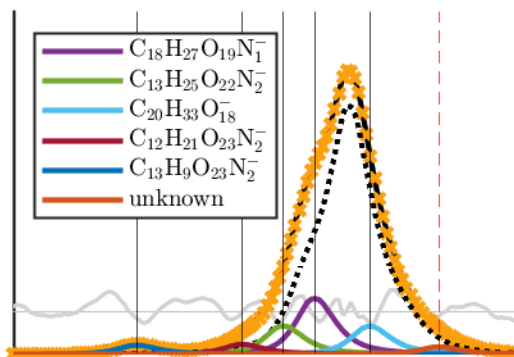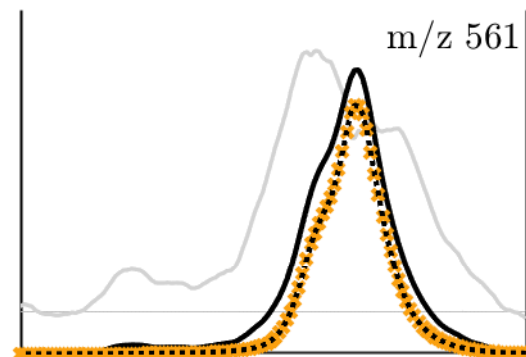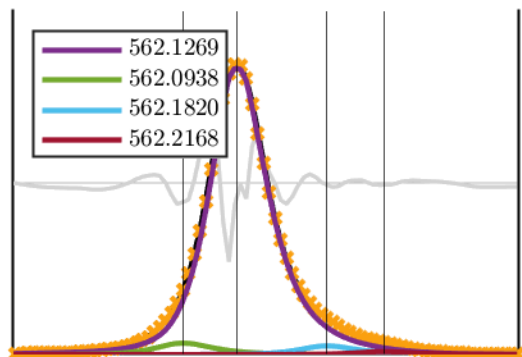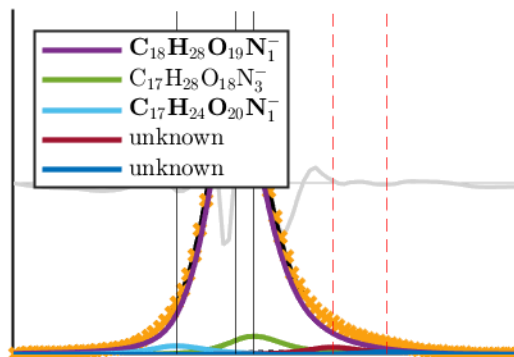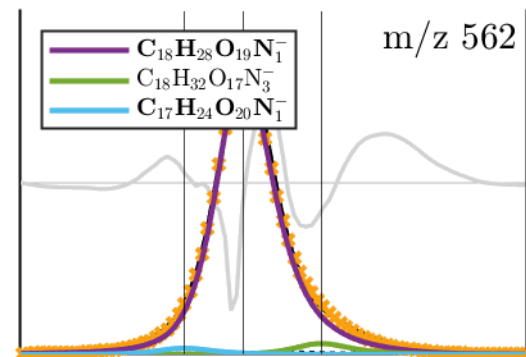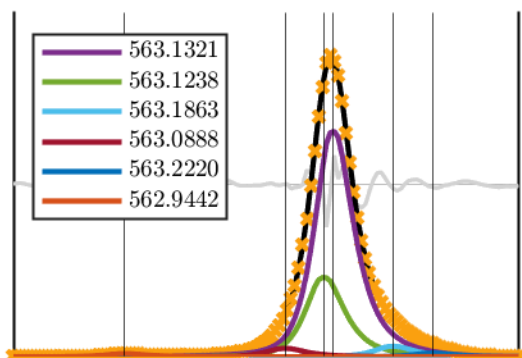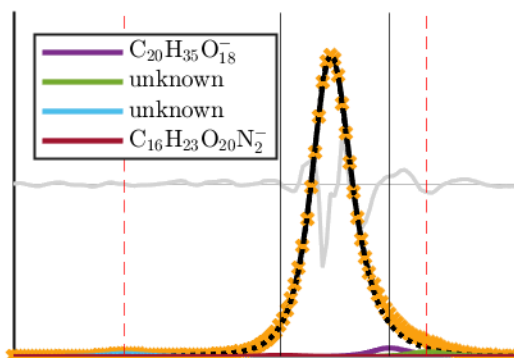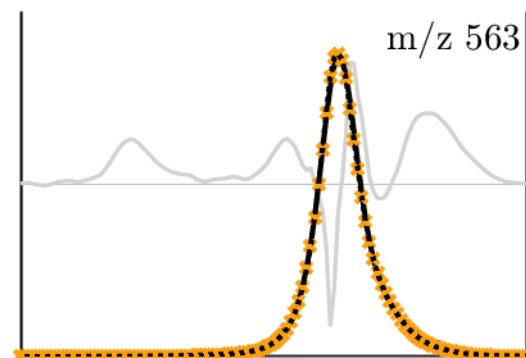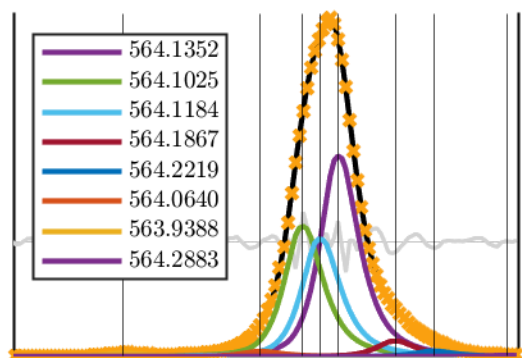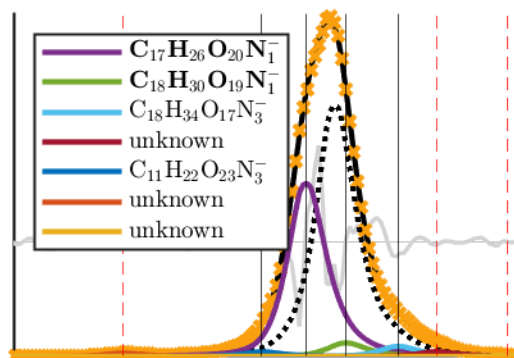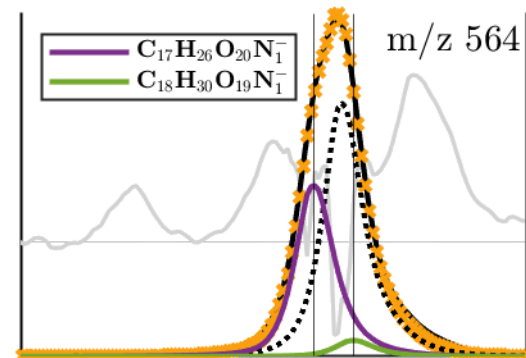



Free fit

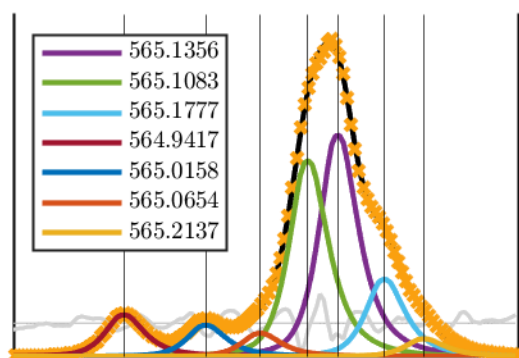

Final fit

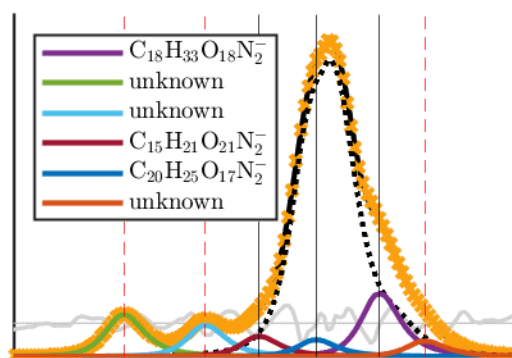

Manual fit

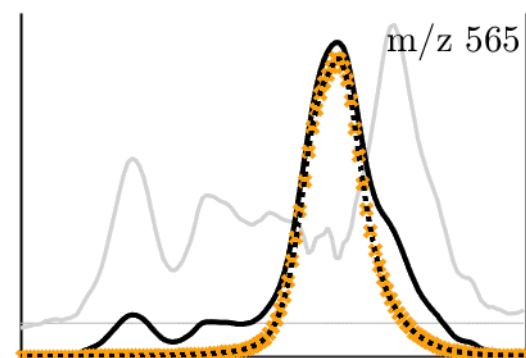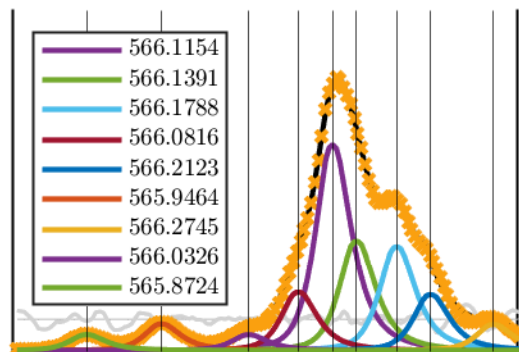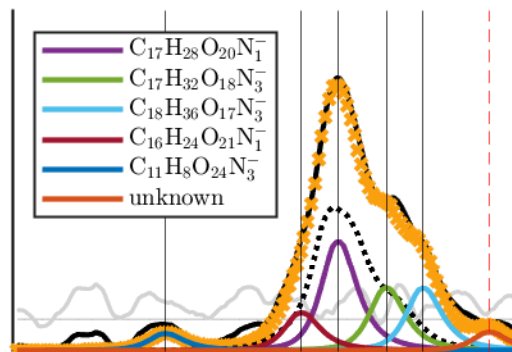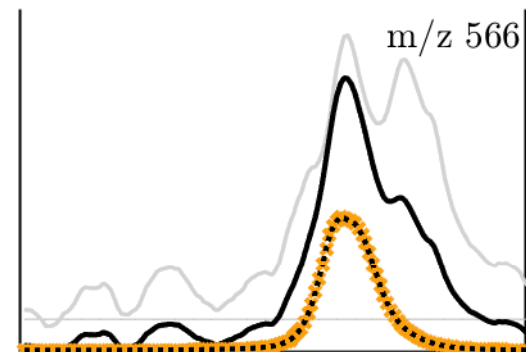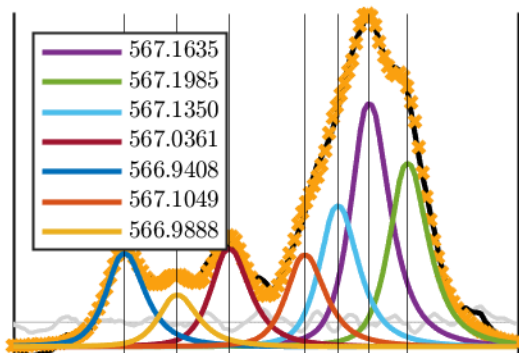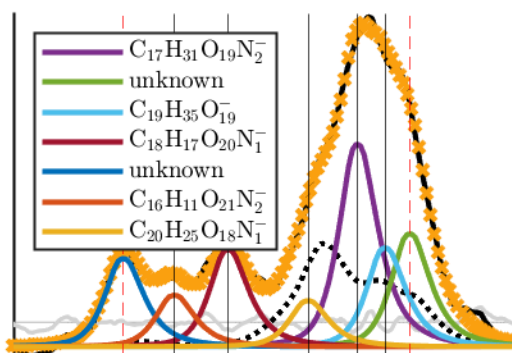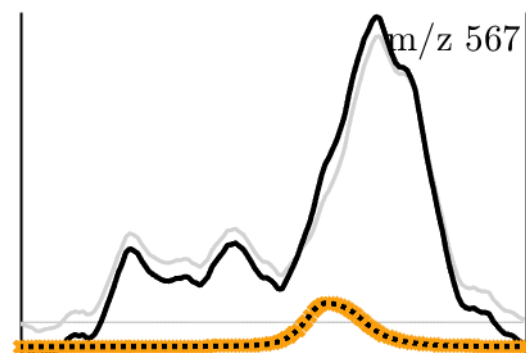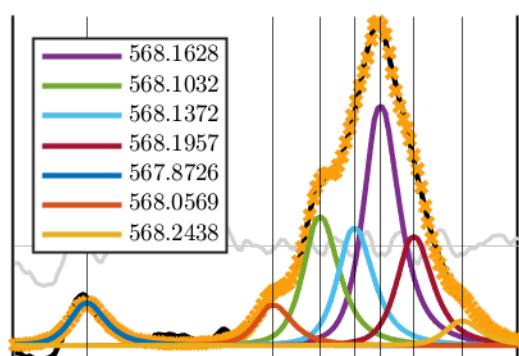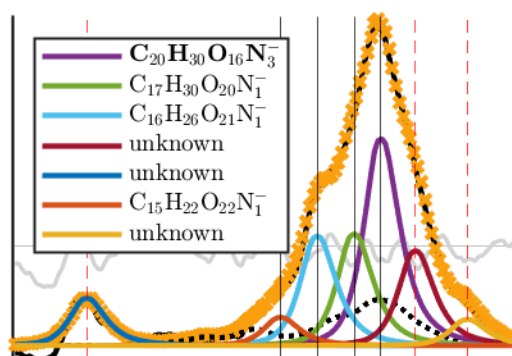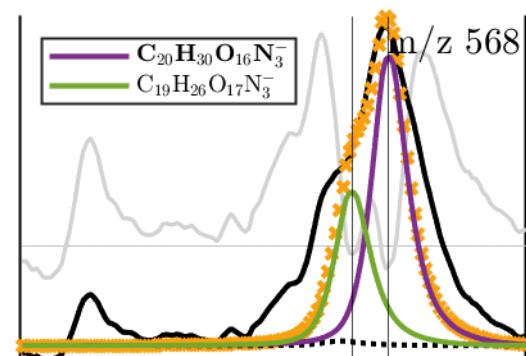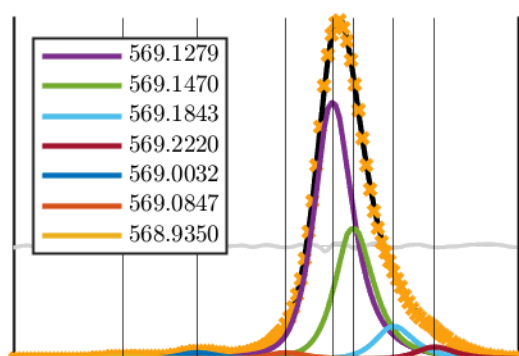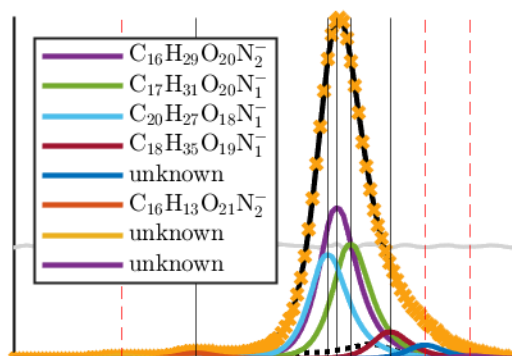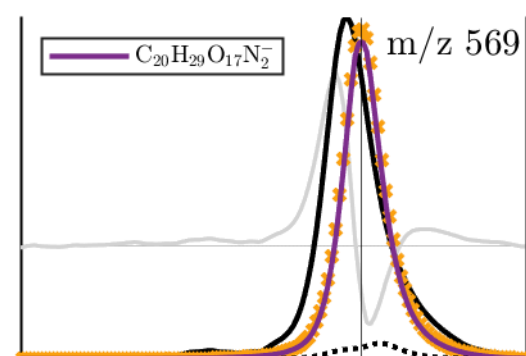

Free fit

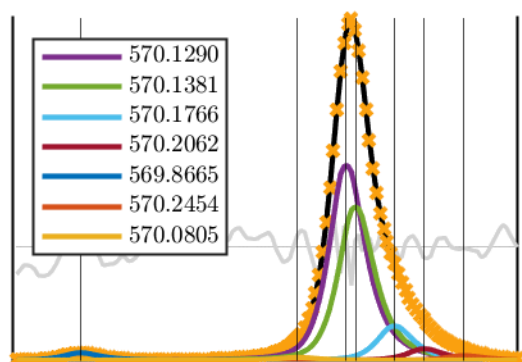

Final fit

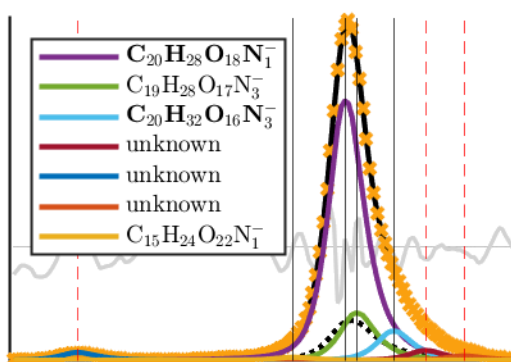

Manual fit

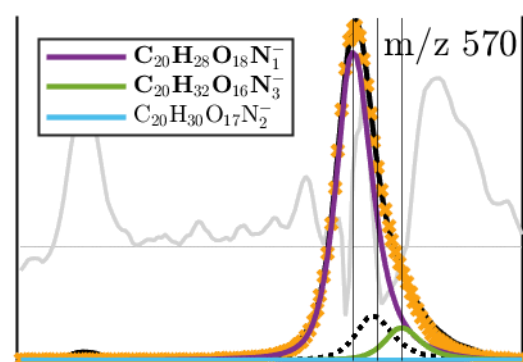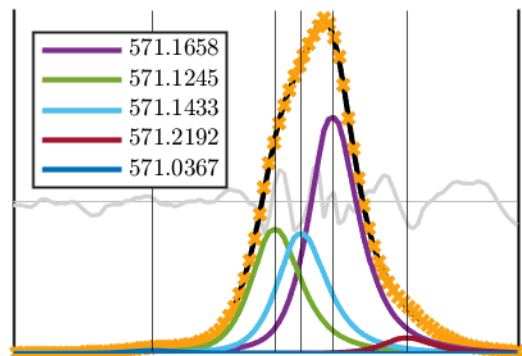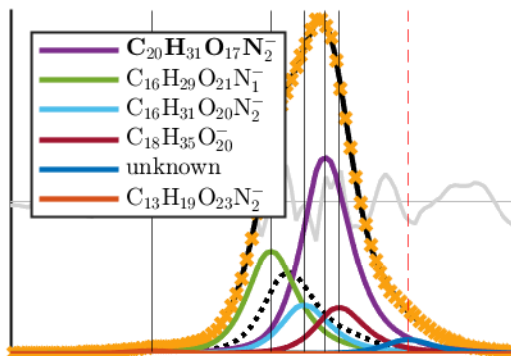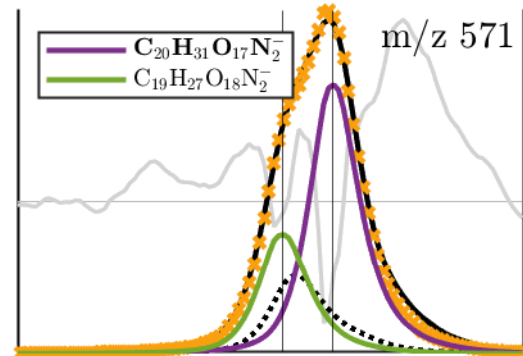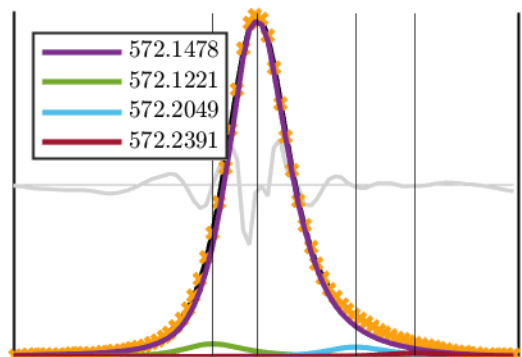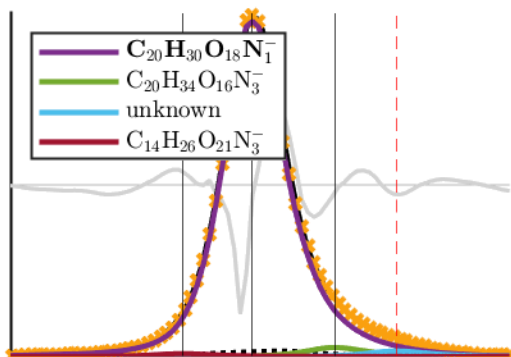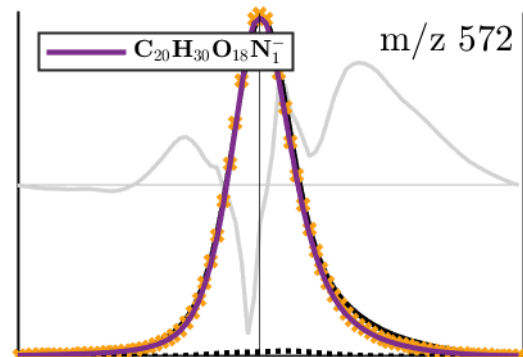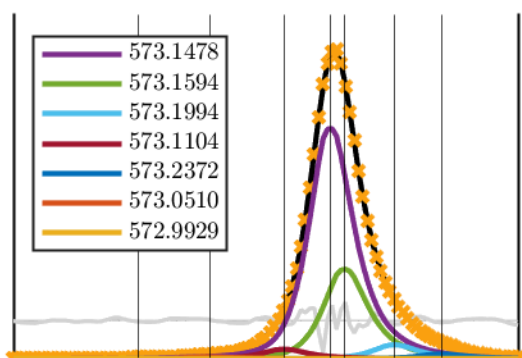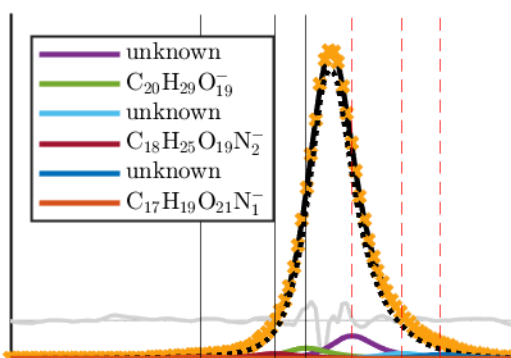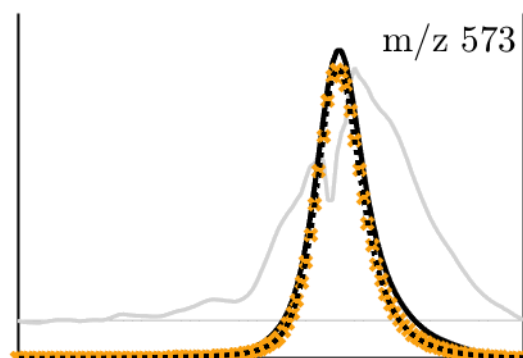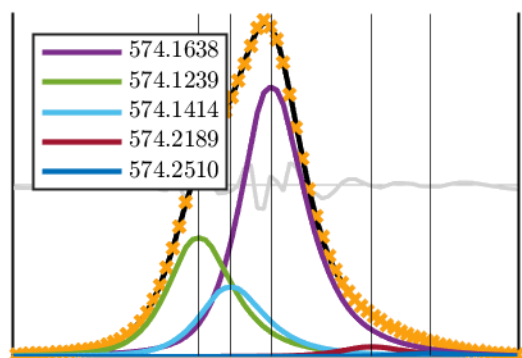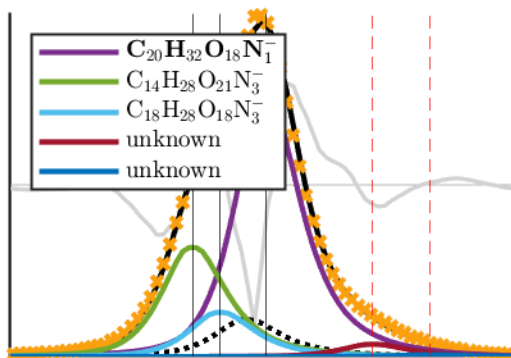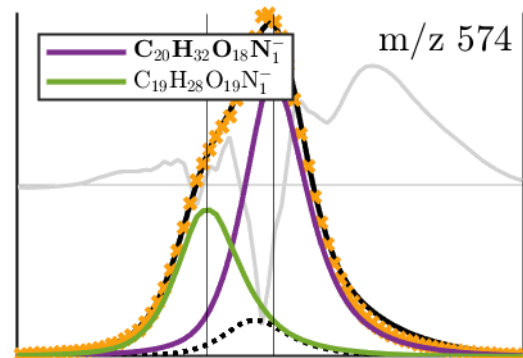

Free fit

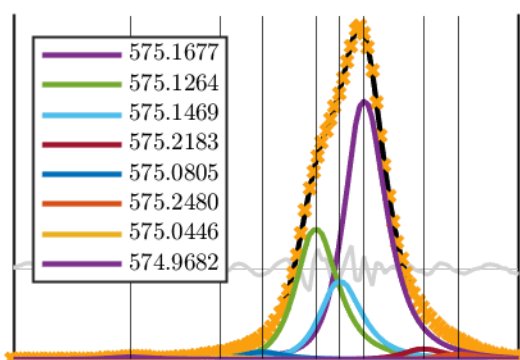

Final fit

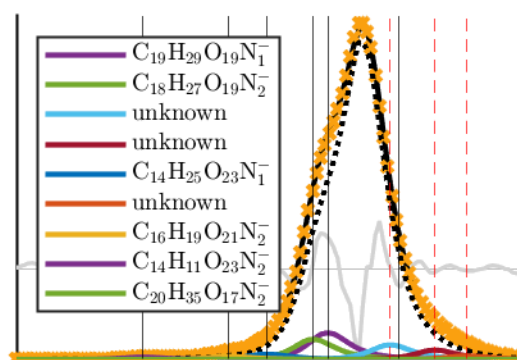

Manual fit

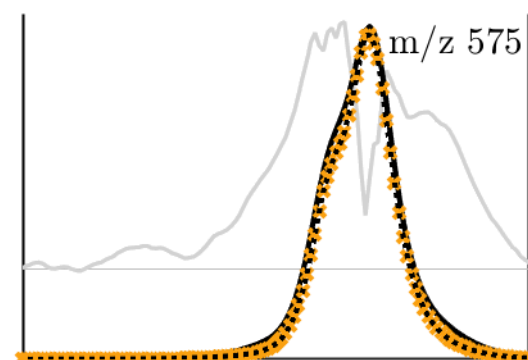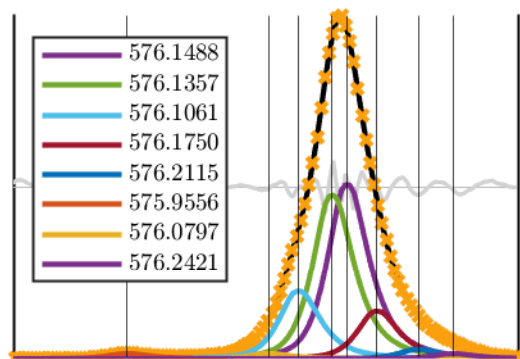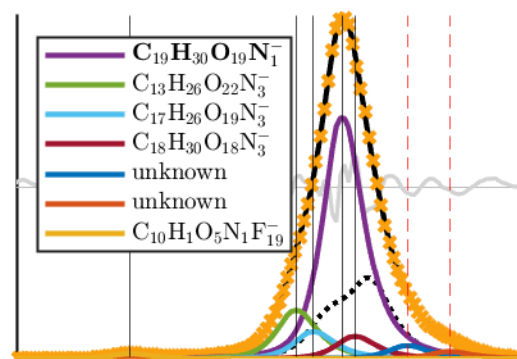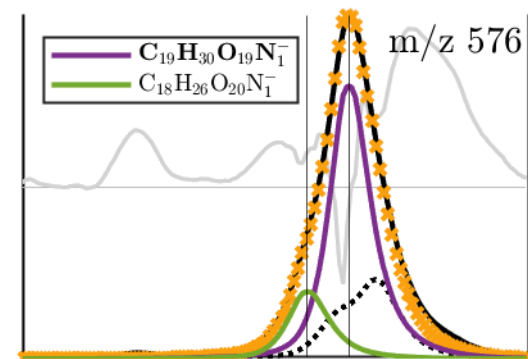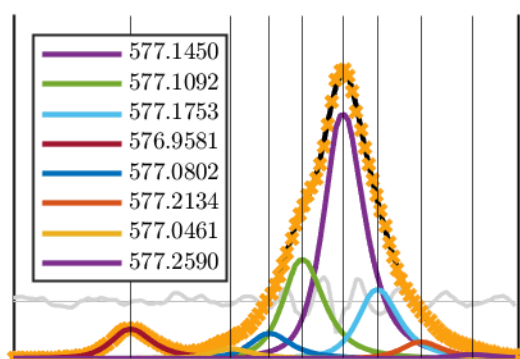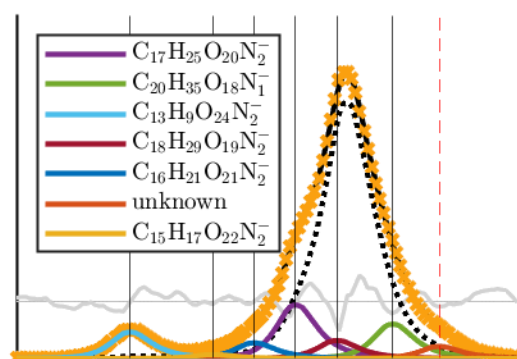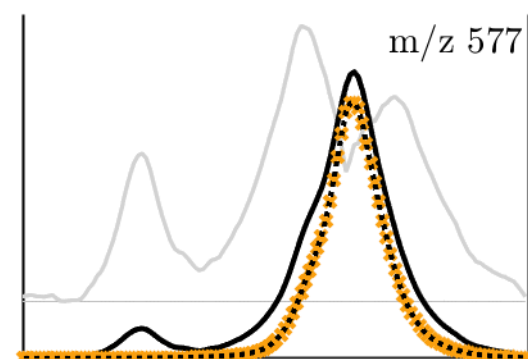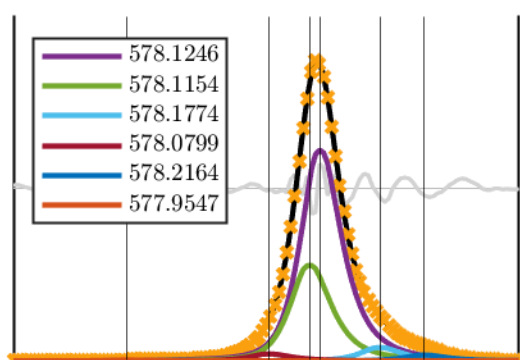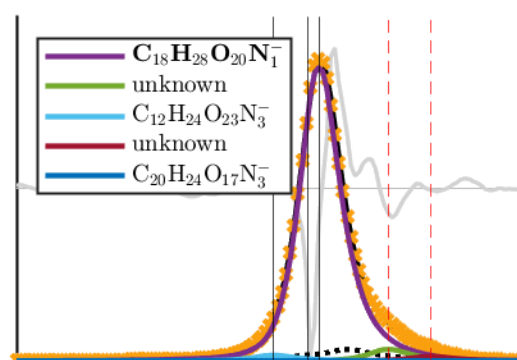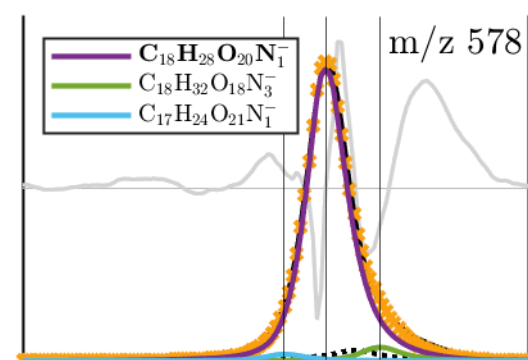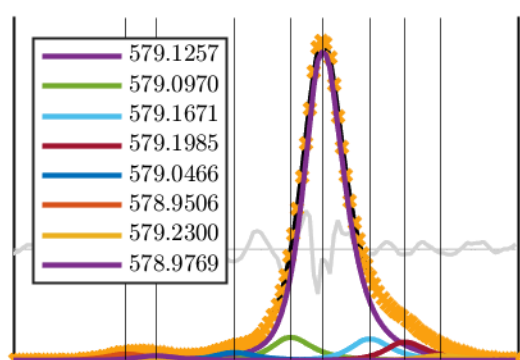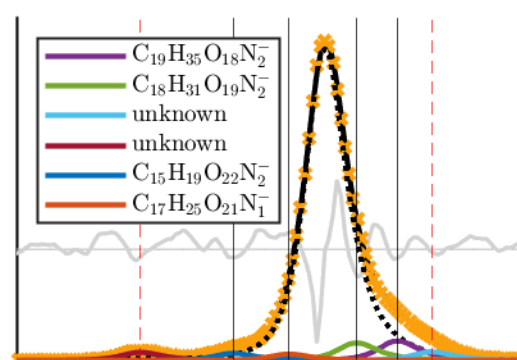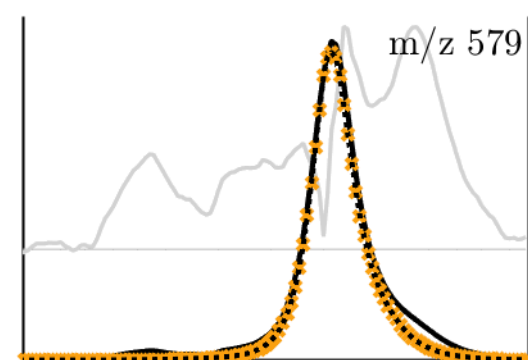



Free fit

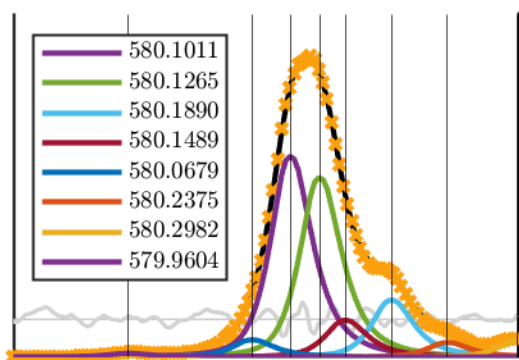

Final fit

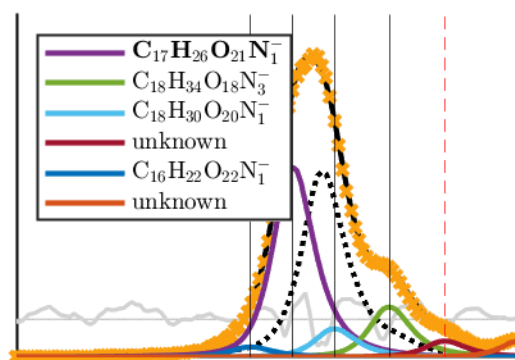

Manual fit

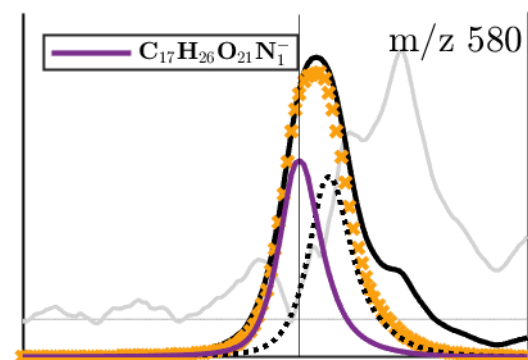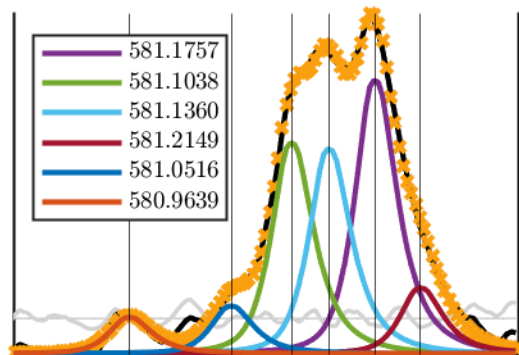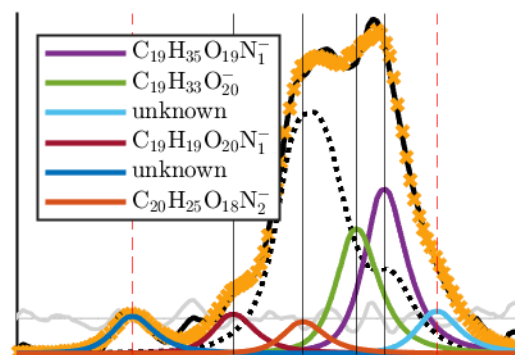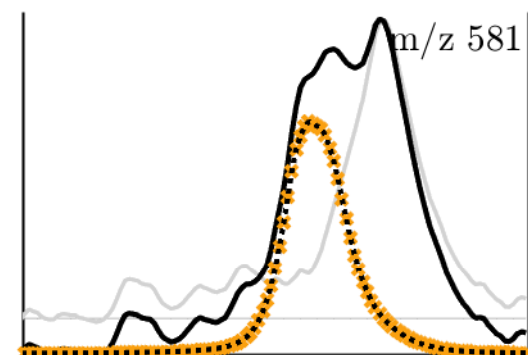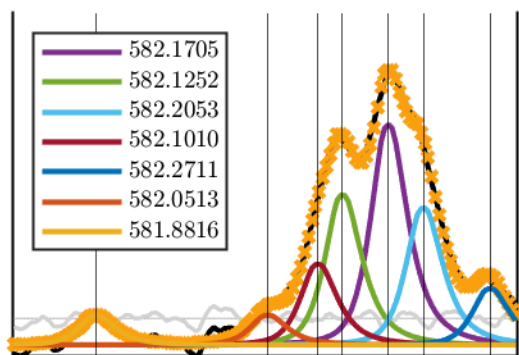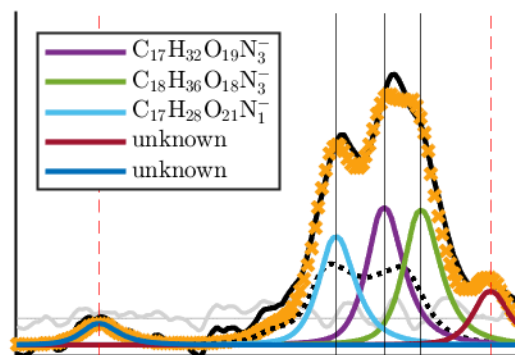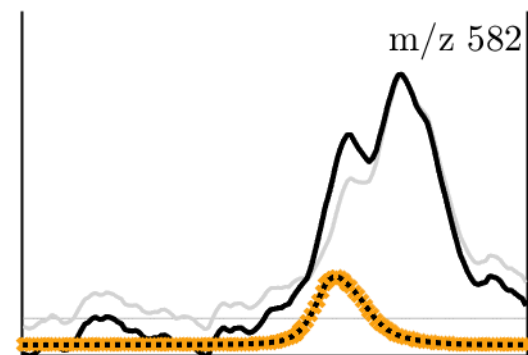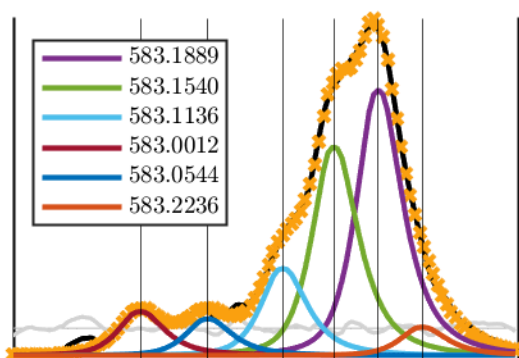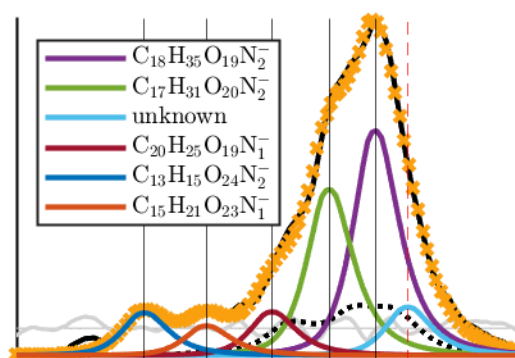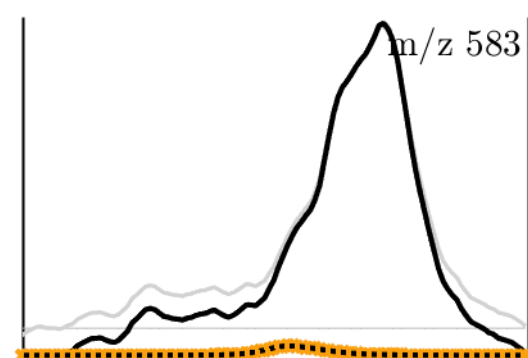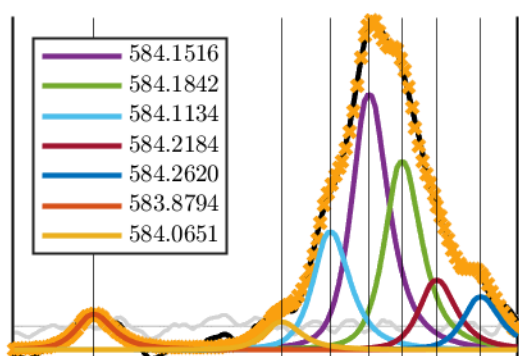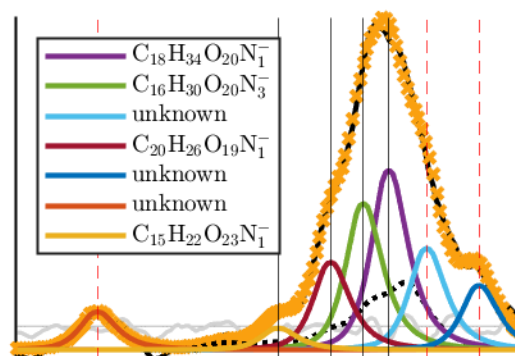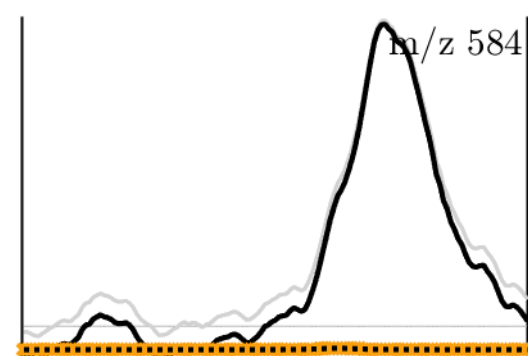

Free fit

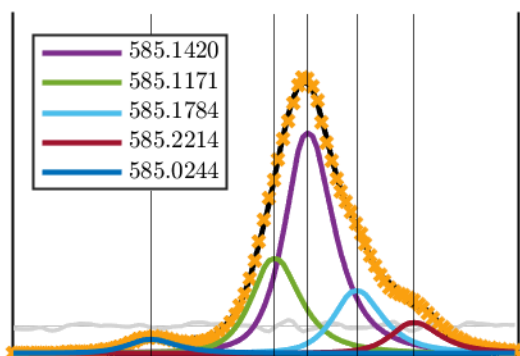

Final fit

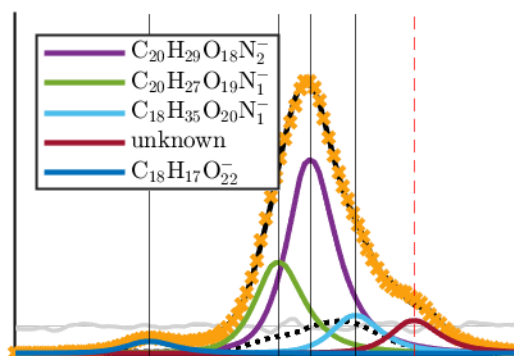

Manual fit

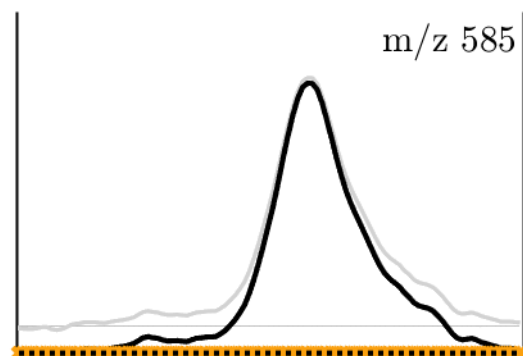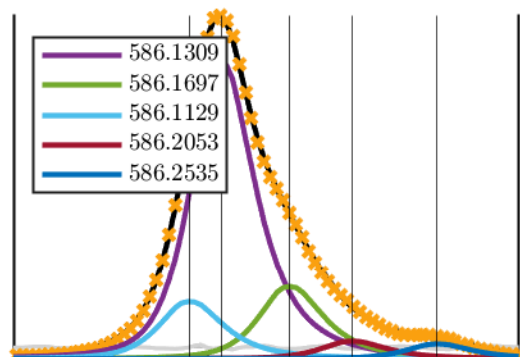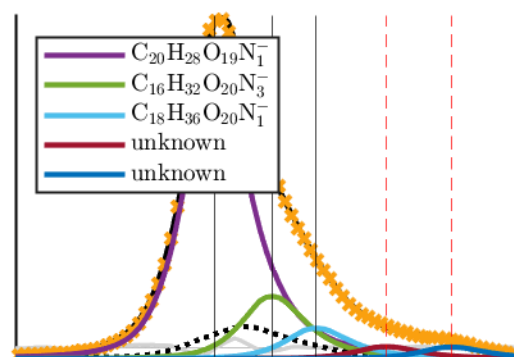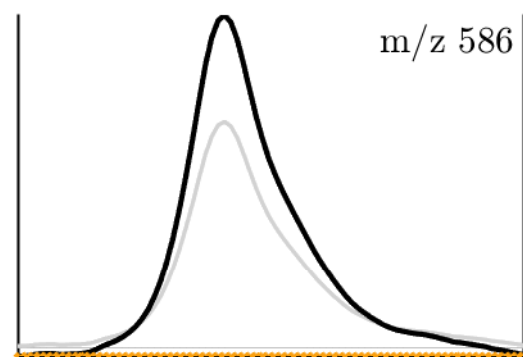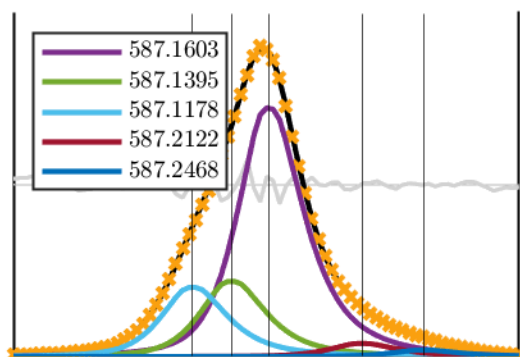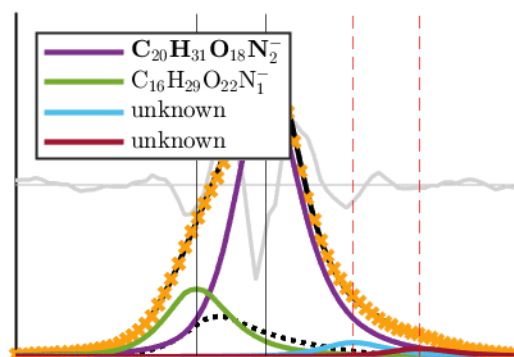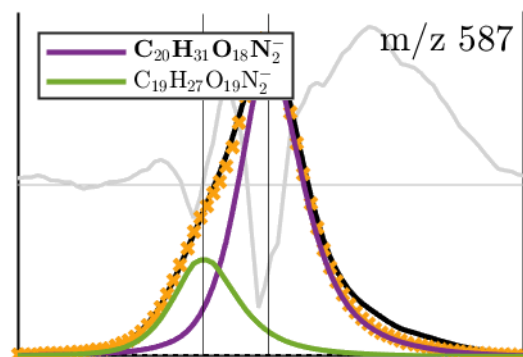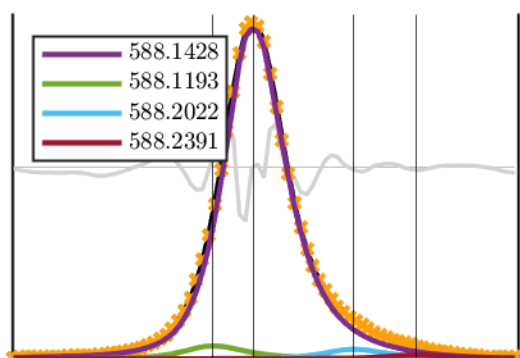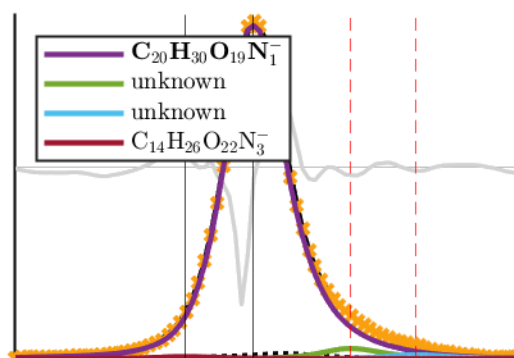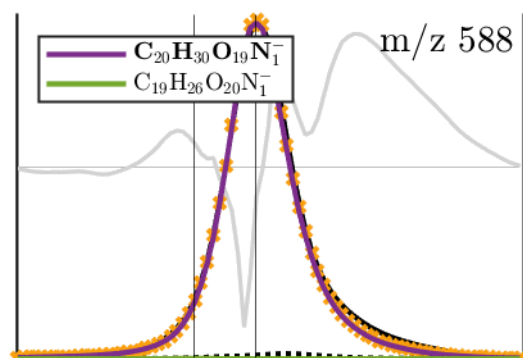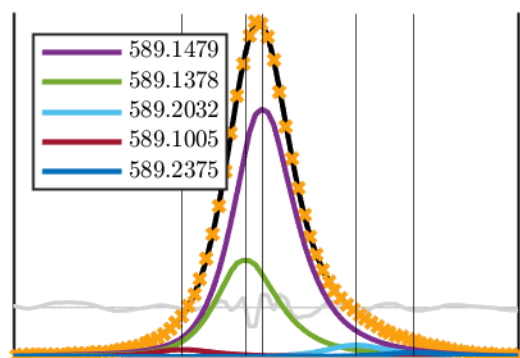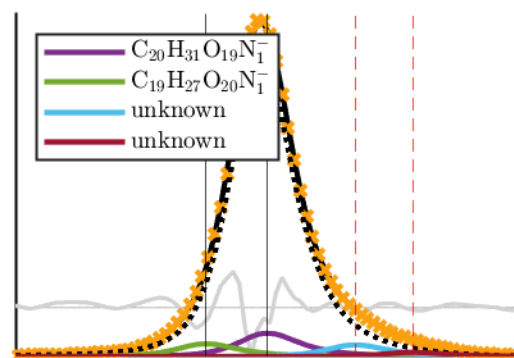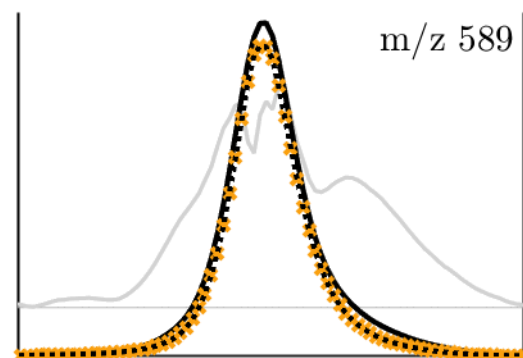

Free fit

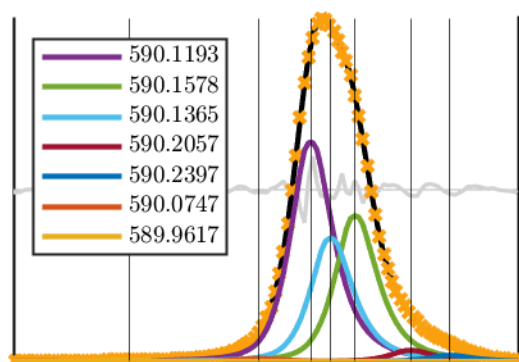

Final fit

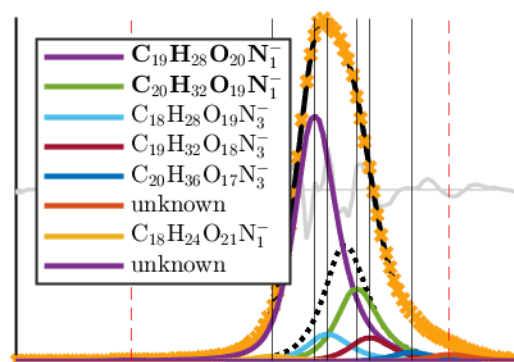

Manual fit

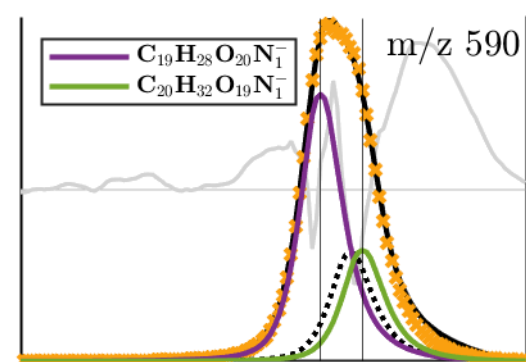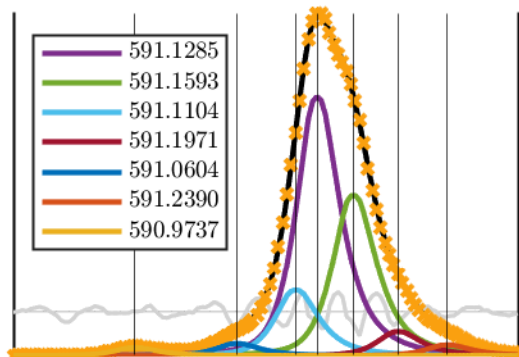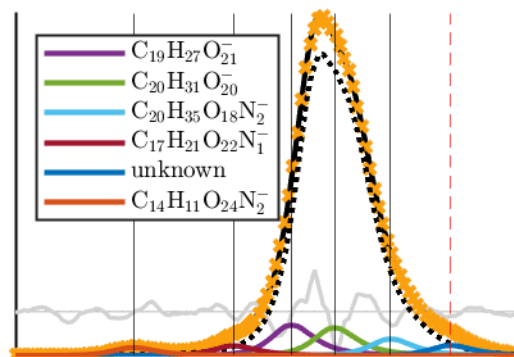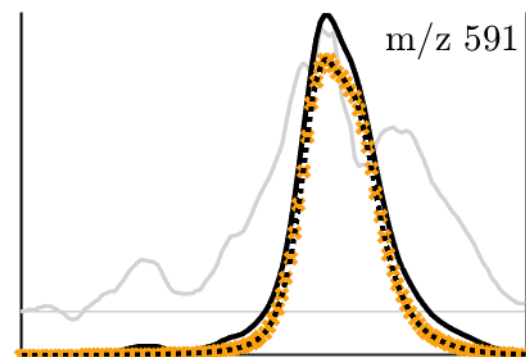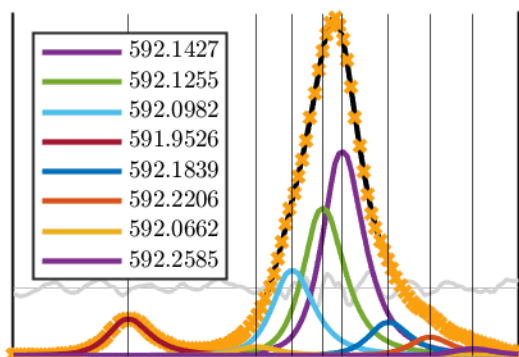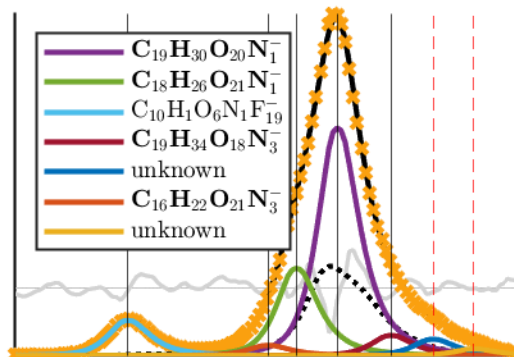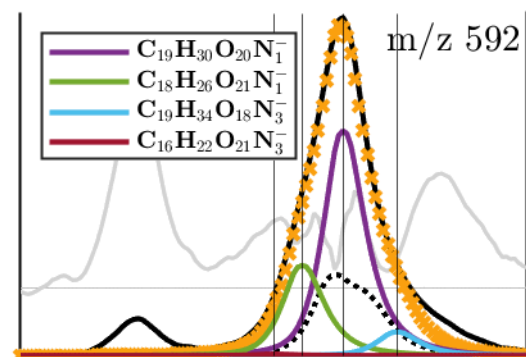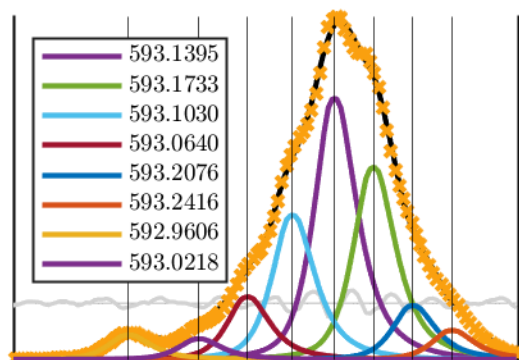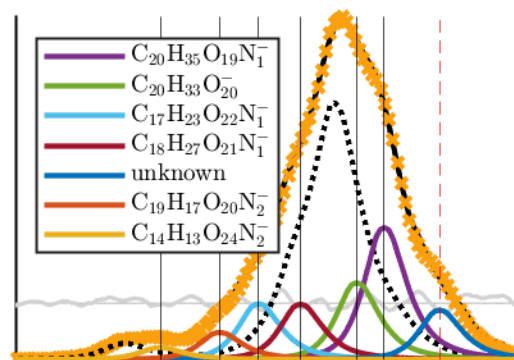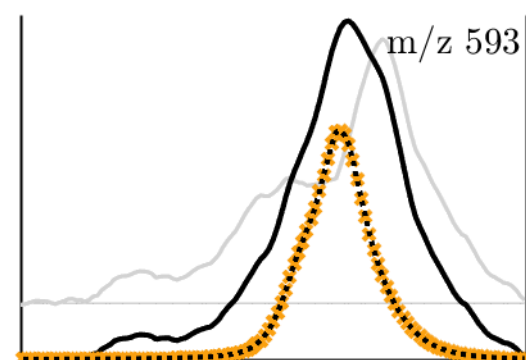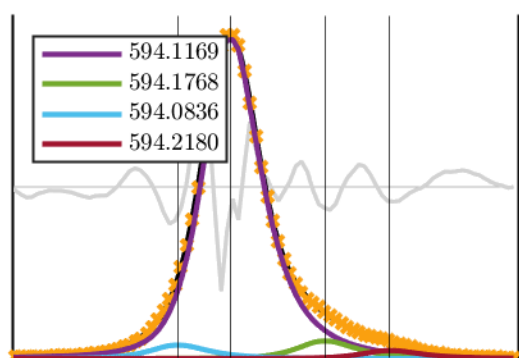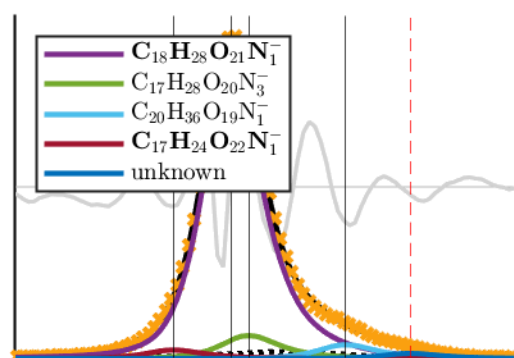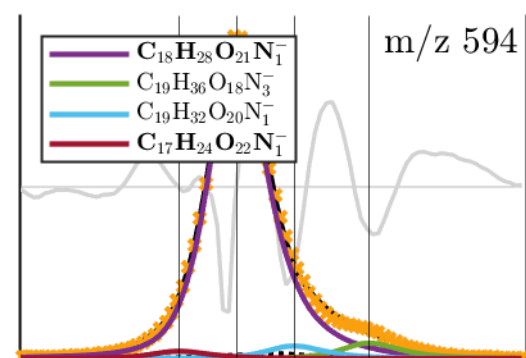



Free fit

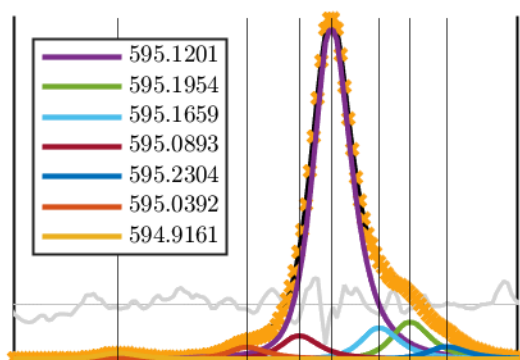

Final fit

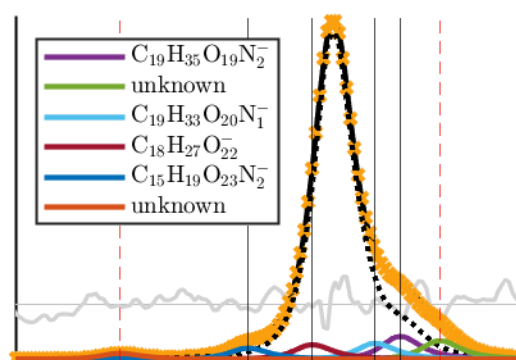

Manual fit

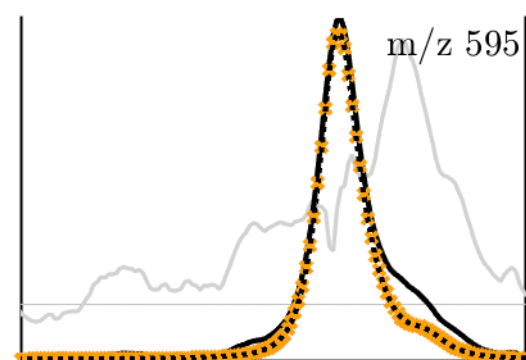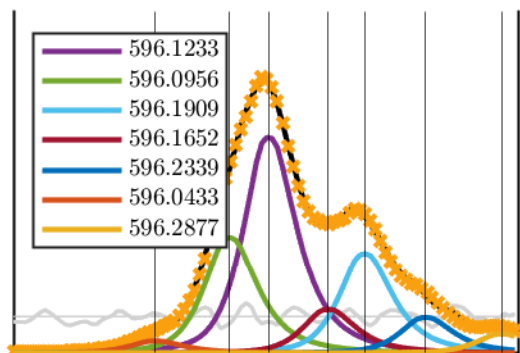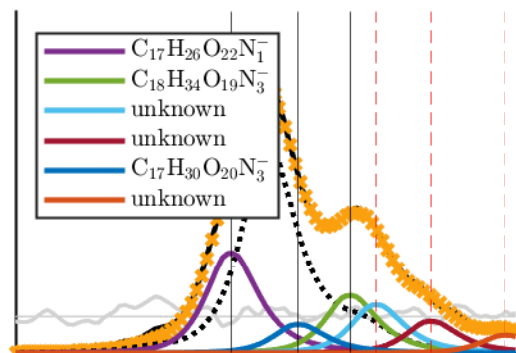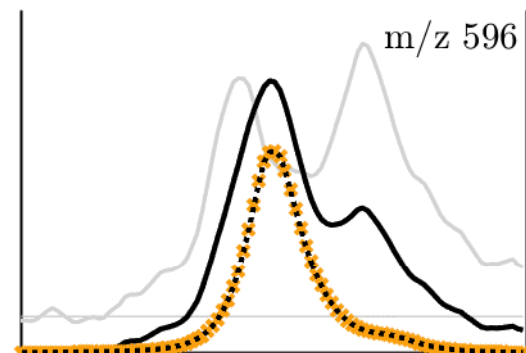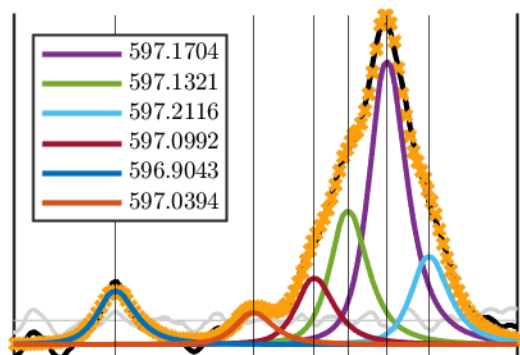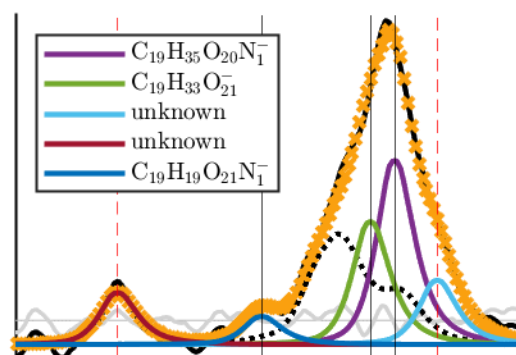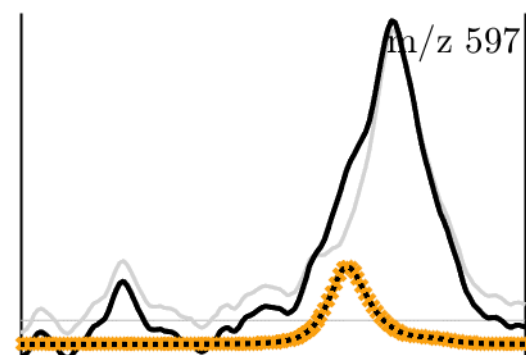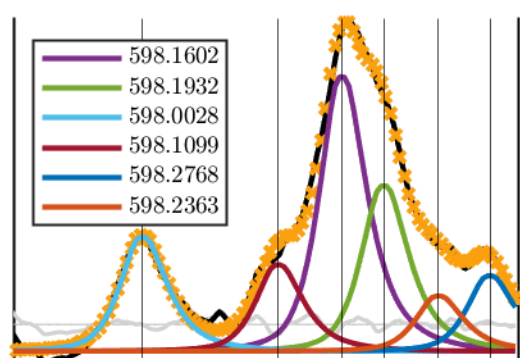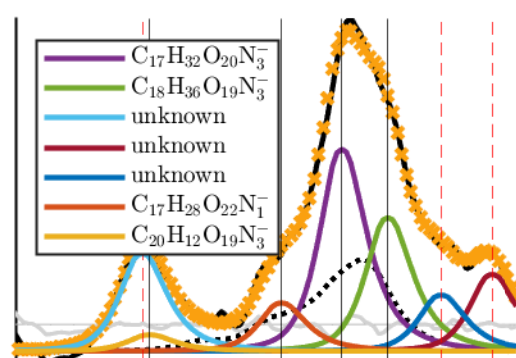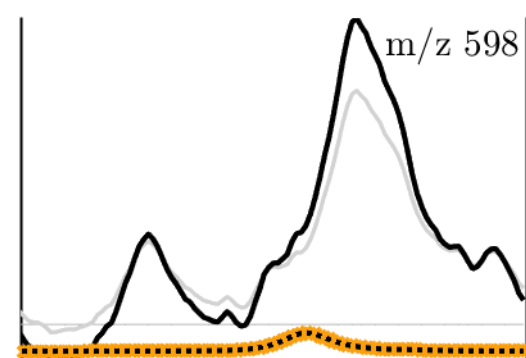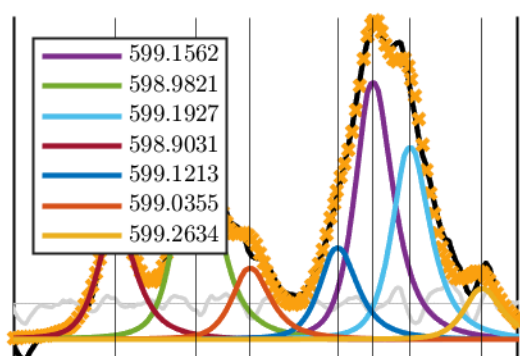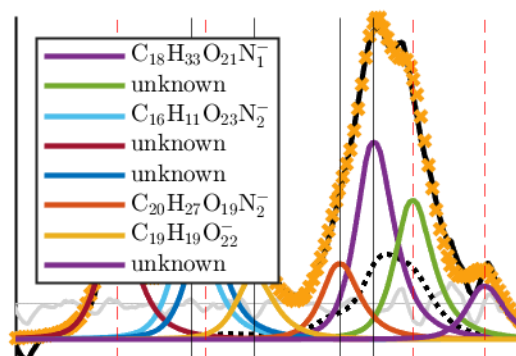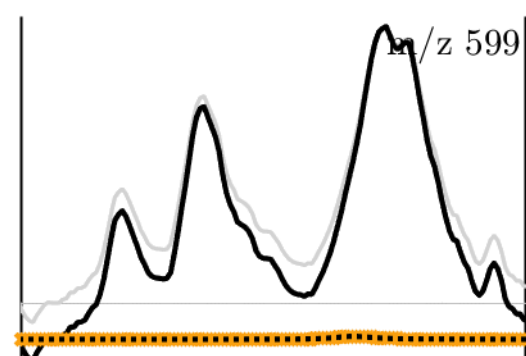

Supplement: Supplementary file 2 [file amt-18-1537-2025-supplement.zip]
