# Supplementary material for: An algorithm for automatic fitting and formula assignment in atmospheric mass spectra
Source: Copernicus journal article supplement (doi:10.5194/amt-18-1537-2025), 2025-04-03
Supplement: Supplementary file 1 [file amt-18-1537-2025-supplement.zip]

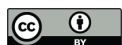

## *Supplement of*

# **An algorithm for automatic fitting and formula assignment in atmospheric mass spectra**

**Valter Mickwitz et al.**

*Correspondence to:* Valter Mickwitz ([valter.mickwitz@helsinki.fi](mailto:valter.mickwitz@helsinki.fi)) and Mikael Ehn ([mikael.ehn@helsinki.fi](mailto:mikael.ehn@helsinki.fi))

- [amt-18-1537-2025-supplement-title-page.pdf](#)
- [AllMassesAMS.pdf](#)
- [AllMassesCIMS.pdf](#)

The copyright of individual parts of the supplement might differ from the article licence.
